# Supplementary material for: Magnetism of metastable γ-Fe85Pd15 nanowire arrays across an unusually broad temperature range (5 K to 800 K)
Source: Royal Society of Chemistry journal article supplement (doi:10.1039/d4nr03119a), 2024-01-01
Supplement: d4nr03119a1.pdf [file d4nr03119a1.pdf]

## **Supplementary Information**

As required by this Journal, the data supporting this article have been included as part of the Supplementary Information.

**Figure 1**

| Length (um) | Diameter (nm) |
|-------------|---------------|
| 1.14027     | 54.484        |
| 1.34483     | 58.027        |
| 1.04598     | 57.173        |
| 1.09201     | 43.299        |
| 1.06208     | 54.429        |
| 1.06897     | 44.676        |
| 1.12442     | 53.791        |
| 1.07832     | 58.055        |
| 1.05066     | 54.85         |
| 1.16186     | 55.849        |
| 1.06007     | 58.99         |
| 1.05986     | 56.071        |
| 1.23726     | 54.858        |
| 1.35886     | 53.291        |
| 1.02759     | 58.603        |
| 1.35506     | 56.652        |
| 1.35107     | 57.444        |
| 1.0069      | 45.516        |
| 1.48736     | 46.097        |
| 1.12874     | 55.494        |
| 1.15632     | 54.779        |
| 1.10346     | 50.272        |
| 1.35161     | 51.608        |
| 1.17471     | 50.727        |
| 1.94737     | 54.645        |
| 1.89474     | 54.801        |
| 1.87368     | 57.268        |
| 1.82632     | 56.608        |
| 1.8         | 58.671        |
| 1.43684     | 54.572        |
| 1.47368     | 58.343        |
| 1.41579     | 52.675        |
| 1.37895     | 54.944        |
| 1.84737     | 51.919        |
| 1.38947     | 41.803        |
| 1.40526     | 45.849        |
| 1.71053     | 52.235        |
| 1.9         | 49.07         |
| 1.34241     | 51.579        |
| 1.47368     | 59.057        |
| 1.55263     | 53.728        |
| 1.80526     | 47.186        |
| 1.40526     | 46.989        |
| 1.38947     | 54.826        |
| 1.43684     | 58.721        |
| 1.51053     | 49.201        |
| 1.77895     | 47.406        |
| 1.42632     | 50.154        |

|         |        |
|---------|--------|
| 1.61053 | 50.867 |
| 1.27895 | 51.018 |
| 1.49474 | 58.031 |
| 1.58421 | 46.298 |
| 1.34737 | 59.551 |
| 1.47895 | 50.913 |
| 1.72632 | 52.144 |
| 1.58421 | 53.371 |
| 1.39474 | 48.507 |
| 1.43158 | 47.401 |
| 1.53158 | 55.659 |
| 1.47368 | 54.954 |
| 1.41579 | 48.206 |
| 1.46842 | 57.824 |
| 1.44211 | 50.705 |
| 1.65789 | 53.83  |
| 1.53684 | 54.755 |
| 1.43158 | 53.63  |
| 1.46842 | 53.787 |
| 1.51053 | 50.761 |
| 1.48421 | 56.406 |
| 1.16316 | 54.598 |
| 1.4     | 52.327 |
| 1.30526 | 50.597 |
| 1.35789 | 53.866 |
| 1.41053 | 58.367 |
| 1.48421 | 56.687 |
| 1.35895 | 52.065 |
| 1.75789 | 40.951 |
| 1.50526 | 50.376 |
| 1.49474 | 52.112 |
| 1.28947 | 55.262 |
| 1.57143 | 48.089 |
| 1.88    | 50.879 |
| 1.36038 | 46.039 |
| 1.35429 | 50.109 |
| 1.86286 | 55.986 |
| 1.72    | 43.122 |
| 1.35437 | 49.678 |
| 1.65714 | 48.146 |
| 1.71429 | 59.534 |
| 1.70881 | 53.092 |
| 1.66857 | 53.078 |
| 1.83429 | 50.883 |
| 1.66286 | 54.531 |
| 1.64    | 56.27  |
| 1.60571 | 56.906 |
| 1.53143 | 51.998 |
| 1.6     | 43.519 |
| 1.35429 | 55.782 |

|         |        |
|---------|--------|
| 1.43429 | 41.022 |
| 1.35657 | 53.652 |
| 1.62857 | 53.935 |
| 1.73143 | 59.169 |
| 1.35714 | 45.799 |
| 1.85714 | 51.119 |
| 1.65368 | 53.561 |
| 1.61143 | 46.873 |
| 1.34343 | 50.633 |
| 1.6     | 48.434 |
| 1.72    | 52.099 |
| 1.72571 | 56.531 |
| 1.66286 | 47.758 |
| 1.37429 | 53.532 |
| 1.54857 | 57.742 |
| 1.6     | 53.674 |
| 1.56    | 54.022 |
| 1.64571 | 52.508 |
| 1.31429 | 50.243 |
| 1.4     | 48.491 |
| 1.38974 | 48.519 |
| 1.61538 | 60.761 |
| 1.58974 | 48.519 |
| 1.68718 | 52.926 |
| 1.53846 | 57.237 |
| 1.33846 | 43.435 |
| 1.49744 | 52.122 |
| 1.46154 | 54.629 |
| 1.50769 | 55.48  |
| 1.35385 | 48.907 |
| 1.37436 | 51.953 |
| 1.38462 | 50.395 |
| 1.30256 | 52.677 |
| 1.43077 | 50.187 |
| 1.20513 | 45.425 |
| 1.37436 | 48.079 |
| 1.58462 | 51.888 |
| 1.64103 | 41.741 |
| 1.49744 | 57.578 |
| 1.50769 | 56.93  |
| 1.53333 | 51.323 |
| 1.49231 | 51.941 |
| 1.55385 | 55.182 |
| 1.48718 | 44.898 |
| 1.51795 | 47.883 |
| 1.58462 | 47.114 |
| 1.55385 | 51.421 |
| 1.52821 | 50.345 |
| 1.27606 | 50.687 |
| 1.29296 | 56.594 |

|         |        |
|---------|--------|
| 1.54648 | 50.68  |
| 1.41549 | 50.387 |
| 1.5     | 51.018 |
| 1.59296 | 51.406 |
| 1.69014 | 50.617 |
| 1.66479 | 51.484 |
| 1.72817 | 50.026 |
| 1.70704 | 54.113 |
| 1.75352 | 52.441 |
| 1.72394 | 53.324 |
| 1.77465 | 54.302 |
| 1.57606 | 52.6   |
| 1.64366 | 50.033 |
| 1.60141 | 58.869 |
| 1.67746 | 51.89  |
| 1.66479 | 51.258 |
| 1.56338 | 51.207 |
| 1.5338  | 57.361 |
| 1.41972 | 47.923 |
| 1.55915 | 49.62  |
| 1.61408 | 42.279 |
| 1.65634 | 44.907 |
| 1.66479 | 54.177 |
| 1.55915 | 46.92  |
| 1.64789 | 49.575 |
| 1.76197 | 46.64  |
| 1.43239 | 44.251 |
| 1.55915 | 43.911 |
| 1.49155 | 44.395 |
| 1.60141 | 48.249 |
| 1.67324 | 42.292 |
| 1.45042 | 56.842 |
| 1.71795 | 54.135 |
| 1.62564 | 52.83  |
| 1.44615 | 53.701 |
| 1.38974 | 47.641 |
| 1.3641  | 49.121 |
| 1.26667 | 44.438 |
| 1.82051 | 47.306 |
| 1.27692 | 50.292 |
| 1.62051 | 50.393 |
| 1.2359  | 51.895 |
| 1.44615 | 51.393 |
| 1.4359  | 50.363 |
| 1.6     | 52.974 |
| 1.54872 | 43.083 |
| 1.72821 | 51.386 |
| 1.43333 | 47.632 |
| 1.54359 | 44.312 |
| 1.54359 | 48.855 |

|         |          |
|---------|----------|
| 1.17949 | 51.825   |
| 1.79487 | 52.684   |
| 1.53333 | 47.757   |
| 1.54154 | 53.624   |
| 1.53946 | 52.263   |
| 1.52308 | 49.254   |
| 1.33846 | 52.524   |
| 1.24615 | 48.699   |
| 1.40513 | 47.914   |
| 1.45641 | 46.209   |
| 1.54444 | 46.936   |
| 1.31579 | 49.254   |
| 1.41053 | 47.053   |
| 1.47368 | 52.422   |
| 1.36316 | 52.938   |
| 1.21053 | 47.121   |
| 1.61053 | 45.498   |
| 1.5     | 46.054   |
| 1.4     | 51.126   |
| 1.37895 | 52.404   |
| 1.34211 | 48.957   |
| 1.41579 | 46.624   |
| 1.41053 | 47.678   |
| 1.71579 | 52.215   |
| 1.24737 | 51.67795 |
| 1.25474 | 50.285   |
| 0.97421 | 48.328   |
| 1.27895 | 36.878   |
| 1.37368 | 45.171   |
| 1.48421 | 42.866   |
| 1.44211 | 50.737   |
| 1.25789 | 40.677   |
| 1.26316 | 48.157   |
| 1.28158 | 54.474   |
| 1.15211 | 45.342   |
| 1.45789 | 44.328   |
| 1.34737 | 46.429   |
| 1.28421 | 44.931   |
| 1.15263 | 46.429   |
| 1.56316 | 40.399   |
| 1.28421 | 48.0135  |
| 1.53684 | 40.119   |
| 1.24156 | 42.761   |
| 0.98442 | 37.668   |
| 1.16883 | 48.348   |
| 1.15325 | 48.891   |
| 1.43896 | 51.861   |
| 1.32987 | 52.72    |
| 1.37792 | 48.793   |
| 1.35201 | 50.66    |

|         |        |
|---------|--------|
| 1.23117 | 47.299 |
| 1.29351 | 45.29  |
| 1.31169 | 48.56  |
| 1.18442 | 38.735 |
| 1.21558 | 45.95  |
| 1.37143 | 53.245 |
| 1.45013 | 50.972 |
| 1.25714 | 48.29  |
| 1.24675 | 37.089 |
| 1.08935 | 42.458 |
| 1.43571 | 35.974 |
| 1.22078 | 48.157 |
| 1.15325 | 50.534 |
| 1.19481 | 48.09  |
| 1.15325 | 42.162 |
| 1.13247 | 48.44  |
| 1.44156 | 48.993 |
| 1.14805 | 45.66  |
| 1.44714 | 47.714 |
| 1.19481 | 45.251 |
| 1.24156 | 44.28  |
| 1.22597 | 50.832 |
| 1.63636 | 40.152 |
| 1.53247 | 46.348 |
| 1.47532 | 55.464 |
| 1.26234 | 44.891 |
| 1.2987  | 48.731 |
| 1.27536 | 40.152 |
| 1.22509 | 41.8   |
| 1.25536 | 46.348 |
| 1.15001 | 63.195 |
| 1.25536 | 63.195 |
| 1.42032 | 45.513 |
| 1.16517 | 40.316 |
| 1.26525 | 54.726 |
| 1.38501 | 50.554 |
| 1.24516 | 44.644 |
| 1.55505 | 43.6   |
| 1.5802  | 45.611 |
| 1.22009 | 42.897 |
| 1.48008 | 38.774 |
| 1.05501 | 51.659 |
| 1.30535 | 41.139 |
| 1.3655  | 45.469 |
| 1.55752 | 44.974 |
| 1.61503 | 49.461 |
| 1.43043 | 43.703 |
| 1.43071 | 44.726 |
| 1.36545 | 47.128 |
| 1.58007 | 42.513 |

|          |        |
|----------|--------|
| 1.18526  | 48.272 |
| 1.35651  | 50.201 |
| 1.32555  | 45.44  |
|          | 38.113 |
|          | 40.36  |
|          | 44.546 |
|          | 45.688 |
|          | 44.615 |
|          | 44.743 |
|          | 46.179 |
|          | 41.864 |
|          | 45.075 |
|          | 41.693 |
|          | 41.645 |
|          | 37.459 |
|          | 43.585 |
|          | 45.739 |
|          | 42.348 |
|          | 42.585 |
|          | 38.144 |
|          | 40.151 |
|          | 47.596 |
|          | 47.117 |
|          | 48.466 |
|          | 44.543 |
|          | 40.632 |
|          | 42.269 |
|          | 40.446 |
|          | 42.626 |
|          | 50.304 |
|          | 42.466 |
| 41.05308 | 61.17  |
|          | 54.908 |
|          | 47.001 |
|          | 42.684 |
|          | 47.191 |
|          | 56.223 |
|          | 51.782 |
|          | 58.963 |
|          | 50.791 |
|          | 53.041 |
|          | 65.713 |
|          | 61.573 |
|          | 59.54  |
|          | 53.98  |
|          | 54.446 |
|          | 59.168 |
|          | 60.885 |
|          | 58.182 |



47.451  
53.598  
50.298  
57.188  
48.84  
46.864  
54.155  
45.799  
60.199  
44.084  
45.338  
52.947  
56.698  
47.726  
60.885  
47.513  
54.398  
63.2  
52.558  
50.953  
56.111  
57.381  
48.775  
61.964  
53.304  
56.893  
57.765  
61.144  
54.359  
52.308  
52.418  
66.974  
64.648  
48.994  
53.54  
59.54  
46.506  
61.685  
52.947  
54.975  
47.413  
56.643  
55.961  
60.199  
56.027  
55.961  
60.574  
49.156  
62.193  
56.494

52.538  
40.398  
46.821  
62.442  
58.40731  
34.185  
50.125  
50.472  
47.257  
48.023  
46.983  
45.762  
51.67795

**Figure 2**

| 2theta | Int (as-dep) | 2theta  | Int (annealed) |
|--------|--------------|---------|----------------|
| 30     | 0.04126      | 35.0117 | 0.02228        |
| 30.02  | 0.02286      | 35.0313 | -0.01136       |
| 30.04  | 0.04578      | 35.051  | 0.00559        |
| 30.06  | 0.0199       | 35.0707 | 0.00144        |
| 30.08  | 0.02725      | 35.0903 | 0.04122        |
| 30.1   | 0.00376      | 35.1296 | -0.00184       |
| 30.12  | 0.04554      | 35.1493 | -0.02181       |
| 30.14  | 0.00978      | 35.1689 | -0.03918       |
| 30.16  | 0.05994      | 35.1886 | -0.02619       |
| 30.18  | 0.02119      | 35.2082 | 0.01535        |
| 30.2   | 0.01776      | 35.2279 | 0.03099        |
| 30.22  | 0.03619      | 35.2475 | -0.01803       |
| 30.24  | 0.03006      | 35.2672 | 0.01299        |
| 30.26  | 0.0431       | 35.2868 | 0.01936        |
| 30.28  | 0.05464      | 35.3065 | -0.00414       |
| 30.3   | 0.03325      | 35.3262 | -0.03071       |
| 30.32  | 0.03611      | 35.3458 | 0.02226        |
| 30.34  | 0.04915      | 35.3655 | 0.03262        |
| 30.36  | 0.04363      | 35.3851 | 0.0069         |
| 30.38  | 0.03331      | 35.4048 | 0.04935        |
| 30.4   | 0.04216      | 35.4244 | 0.01835        |
| 30.42  | 0.02526      | 35.4441 | 0.00101        |
| 30.44  | 0.02064      | 35.4637 | -0.01943       |
| 30.46  | 0.01302      | 35.4834 | 5.95E-04       |
| 30.48  | 0.03085      | 35.503  | 0.03334        |
| 30.5   | 0.05496      | 35.5227 | 0.02963        |
| 30.52  | 0.02369      | 35.5423 | 0.06106        |
| 30.54  | 0.00919      | 35.5817 | 0.01979        |
| 30.56  | 0.0369       | 35.6013 | 0.0433         |
| 30.58  | 0.03257      | 35.621  | -0.00393       |
| 30.6   | 0.04381      | 35.6406 | 0.05124        |
| 30.62  | 0.01763      | 35.6603 | 0.04401        |
| 30.64  | 0.0139       | 35.6799 | -0.02083       |
| 30.66  | 0.05179      | 35.7192 | -0.03927       |
| 30.68  | 0.04028      | 35.7389 | -0.0065        |
| 30.7   | 0.04554      | 35.7585 | 0.11197        |
| 30.72  | 0.02355      | 35.7978 | 0.01396        |
| 30.74  | 0.027        | 35.8765 | 0.05316        |
| 30.76  | 0.01908      | 35.8961 | 0.06261        |
| 30.78  | 0.03931      | 35.9158 | -4.45E-04      |
| 30.8   | 0.03049      | 35.9354 | 0.0512         |
| 30.82  | 0.03724      | 35.9551 | 0.01584        |
| 30.84  | 0.02693      | 35.9747 | 0.03936        |
| 30.86  | 0.02231      | 35.9944 | 0.06466        |
| 30.88  | 0.05061      | 36.014  | -0.01953       |

|       |         |         |          |
|-------|---------|---------|----------|
| 30.9  | 0.04269 | 36.0337 | 0.04446  |
| 30.92 | 0.04855 | 36.073  | 0.02075  |
| 30.94 | 0.0559  | 36.0926 | 0.02404  |
| 30.96 | 0.03301 | 36.1123 | -0.0355  |
| 30.98 | 0.05294 | 36.1516 | 0.00101  |
| 31    | 0.04921 | 36.1713 | 0.04522  |
| 31.02 | 0.04518 | 36.1909 | 0.06917  |
| 31.04 | 0.02888 | 36.2302 | -0.0029  |
| 31.06 | 0.03174 | 36.2499 | 0.0224   |
| 31.08 | 0.06095 | 36.2695 | 0.04592  |
| 31.1  | 0.04644 | 36.3088 | -0.03099 |
| 31.12 | 0.04601 | 36.3285 | 0.02904  |
| 31.14 | 0.0342  | 36.3481 | -0.00459 |
| 31.16 | 0.0155  | 36.3678 | 0.04049  |
| 31.18 | 0.0465  | 36.3875 | 0.02887  |
| 31.2  | 0.03559 | 36.4071 | 0.04623  |
| 31.22 | 0.0157  | 36.4268 | 0.05966  |
| 31.24 | 0.02574 | 36.4464 | 0.01988  |
| 31.26 | 0.04776 | 36.4661 | 0.0654   |
| 31.28 | 0.03655 | 36.4857 | -0.01131 |
| 31.3  | 0.05138 | 36.5054 | -0.00359 |
| 31.32 | 0.04257 | 36.5447 | -0.02072 |
| 31.34 | 0.0113  | 36.5643 | 0.01994  |
| 31.36 | 0.05667 | 36.6036 | 0.01117  |
| 31.38 | 0.03288 | 36.6233 | 0.04439  |
| 31.4  | 0.02257 | 36.643  | 2.37E-04 |
| 31.42 | 0.04369 | 36.6626 | -0.01713 |
| 31.44 | 0.06092 | 36.7216 | 0.04292  |
| 31.46 | 0.06857 | 36.7412 | -0.00258 |
| 31.48 | 0.06335 | 36.7609 | 0.02448  |
| 31.5  | 0.03747 | 36.7805 | -0.00344 |
| 31.52 | 0.04871 | 36.8002 | 0.0522   |
| 31.54 | 0.07911 | 36.8198 | 0.04846  |
| 31.56 | 0.05892 | 36.8395 | -0.01592 |
| 31.58 | 0.09771 | 36.8591 | 0.01683  |
| 31.6  | 0.12631 | 36.8788 | 0.0118   |
| 31.62 | 0.1175  | 36.8984 | 0.03136  |
| 31.64 | 0.11107 | 36.9181 | 8.34E-04 |
| 31.66 | 0.08609 | 36.9378 | -0.03629 |
| 31.68 | 0.08476 | 36.9771 | 2.23E-04 |
| 31.7  | 0.07714 | 36.9967 | 0.01802  |
| 31.72 | 0.05515 | 37.0164 | 0.04465  |
| 31.74 | 0.03765 | 37.036  | 0.05497  |
| 31.76 | 0.06237 | 37.0557 | 0.0539   |
| 31.78 | 0.05115 | 37.0753 | 0.01235  |
| 31.8  | 0.04204 | 37.095  | -0.0274  |
| 31.82 | 0.03502 | 37.1146 | 0.02249  |

|       |         |         |           |
|-------|---------|---------|-----------|
| 31.84 | 0.02889 | 37.1343 | 0.05043   |
| 31.86 | 0.03265 | 37.1539 | 0.00449   |
| 31.88 | 0.03072 | 37.1736 | 0.02012   |
| 31.9  | 0.04646 | 37.1933 | -0.0214   |
| 31.92 | 0.04782 | 37.2129 | 0.02981   |
| 31.94 | 0.03451 | 37.2326 | -0.00159  |
| 31.96 | 0.03288 | 37.2522 | 0.00741   |
| 31.98 | 0.03424 | 37.2719 | 0.00854   |
| 32    | 0.05985 | 37.3112 | -0.00375  |
| 32.02 | 0.04715 | 37.3308 | 0.01449   |
| 32.04 | 0.03983 | 37.3505 | 0.04068   |
| 32.06 | 0.02442 | 37.3701 | 0.00572   |
| 32.08 | 0.05812 | 37.3898 | -0.00282  |
| 32.1  | 0.07505 | 37.4094 | 0.03476   |
| 32.12 | 0.03629 | 37.4291 | -0.01159  |
| 32.14 | 0.04664 | 37.4488 | -0.01706  |
| 32.16 | 0.06088 | 37.4684 | 0.01305   |
| 32.18 | 0.04218 | 37.5274 | 0.07574   |
| 32.2  | 0.03546 | 37.547  | 0.00386   |
| 32.22 | 0.01975 | 37.5667 | 0.01774   |
| 32.24 | 0.05704 | 37.606  | 0.0604    |
| 32.26 | 0.04823 | 37.6256 | -0.01807  |
| 32.28 | 0.04151 | 37.6453 | -0.01783  |
| 32.3  | 0.03868 | 37.6649 | -0.00618  |
| 32.32 | 0.03435 | 37.6846 | -0.00857  |
| 32.34 | 0.00937 | 37.7043 | 0.01014   |
| 32.36 | 0.05714 | 37.7436 | 0.01236   |
| 32.38 | 0.04772 | 37.7632 | -0.02303  |
| 32.4  | 0.03531 | 37.8222 | 0.04581   |
| 32.42 | 0.04955 | 37.8615 | -0.01967  |
| 32.44 | 0.02247 | 37.8811 | -5.47E-04 |
| 32.46 | 0.0406  | 37.9008 | -3.01E-04 |
| 32.48 | 0.01651 | 37.9204 | 0.00915   |
| 32.5  | 0.03434 | 37.9401 | -0.00643  |
| 32.52 | 0.04858 | 37.9597 | 0.01796   |
| 32.54 | 0.03677 | 37.9794 | -0.03015  |
| 32.56 | 0.0546  | 37.9991 | 0.05714   |
| 32.58 | 0.02273 | 38.0384 | 0.04178   |
| 32.6  | 0.03816 | 38.058  | 0.0521    |
| 32.62 | 0.02515 | 38.0777 | -0.01008  |
| 32.64 | 0.02921 | 38.0973 | 0.05652   |
| 32.66 | 0.02608 | 38.117  | 0.07787   |
| 32.68 | 0.03433 | 38.1366 | 0.06622   |
| 32.7  | 0.0327  | 38.1563 | 0.04844   |
| 32.72 | 0.03616 | 38.1759 | -0.00454  |
| 32.74 | 0.04171 | 38.2152 | 0.05439   |
| 32.76 | 0.04577 | 38.2349 | 0.05684   |

|       |         |         |           |
|-------|---------|---------|-----------|
| 32.78 | 0.03935 | 38.2546 | 0.01092   |
| 32.8  | 0.01825 | 38.2939 | 0.00987   |
| 32.82 | 0.02141 | 38.3135 | -8.80E-04 |
| 32.84 | 0.05571 | 38.3332 | 0.00904   |
| 32.86 | 0.03252 | 38.3725 | 0.09174   |
| 32.88 | 0.04706 | 38.3921 | -0.00737  |
| 32.9  | 0.03644 | 38.4118 | 0.08212   |
| 32.92 | 0.04499 | 38.4314 | 0.08588   |
| 32.94 | 0.03528 | 38.4511 | 0.02371   |
| 32.96 | 0.04772 | 38.4707 | -0.00374  |
| 32.98 | 0.02393 | 38.4904 | 0.03651   |
| 33    | 0.05284 | 38.5101 | -0.00764  |
| 33.02 | 0.04731 | 38.5887 | 0.03599   |
| 33.04 | 0.03161 | 38.6083 | 0.02656   |
| 33.06 | 0.06261 | 38.628  | -4.45E-04 |
| 33.08 | 0.03823 | 38.6476 | 0.00288   |
| 33.1  | 0.04648 | 38.6673 | 0.04533   |
| 33.12 | 0.03047 | 38.6869 | 0.06975   |
| 33.14 | 0.03932 | 38.7066 | 0.00889   |
| 33.16 | 0.02661 | 38.7262 | 0.01749   |
| 33.18 | 0.03396 | 38.7459 | -0.00732  |
| 33.2  | 0.03952 | 38.7656 | -0.01147  |
| 33.22 | 0.04537 | 38.7852 | 0.07318   |
| 33.24 | 0.04823 | 38.8245 | 0.04642   |
| 33.26 | 0.0466  | 38.8442 | 0.00667   |
| 33.28 | 0.05874 | 38.8638 | 0.04384   |
| 33.3  | 0.02747 | 38.8835 | 0.00892   |
| 33.32 | 0.03961 | 38.9031 | 0.02806   |
| 33.34 | 0.04576 | 38.9228 | 0.04238   |
| 33.36 | 0.02497 | 38.9424 | 0.00834   |
| 33.38 | 0.02963 | 38.9621 | 0.05211   |
| 33.4  | 0.02051 | 38.9817 | 0.06114   |
| 33.42 | 0.05061 | 39.0014 | 0.03589   |
| 33.44 | 0.04659 | 39.021  | 0.01548   |
| 33.46 | 0.03328 | 39.0407 | 0.05837   |
| 33.48 | 0.0565  | 39.0604 | 0.03224   |
| 33.5  | 0.04229 | 39.08   | 0.01666   |
| 33.52 | 0.03467 | 39.0997 | 0.04724   |
| 33.54 | 0.04981 | 39.1193 | 0.00484   |
| 33.56 | 0.05177 | 39.1586 | 0.0194    |
| 33.58 | 0.03038 | 39.1783 | 0.08472   |
| 33.6  | 0.04132 | 39.1979 | 0.01242   |
| 33.62 | 0.0367  | 39.2176 | -9.55E-04 |
| 33.64 | 0.04465 | 39.2372 | 0.03578   |
| 33.66 | 0.03852 | 39.2765 | -0.03143  |
| 33.68 | 0.0336  | 39.2962 | 0.03784   |
| 33.7  | 0.02149 | 39.3355 | 0.00888   |

|       |         |         |          |
|-------|---------|---------|----------|
| 33.72 | 0.01237 | 39.3552 | 0.00209  |
| 33.74 | 0.02242 | 39.3748 | 0.01421  |
| 33.76 | 0.04504 | 39.3945 | 0.03775  |
| 33.78 | 0.03472 | 39.4141 | 0.05251  |
| 33.8  | 0.05345 | 39.4338 | 0.04572  |
| 33.82 | 0.02966 | 39.4534 | 0.01563  |
| 33.84 | 0.03522 | 39.4731 | 0.01236  |
| 33.86 | 0.0273  | 39.5124 | 0.00231  |
| 33.88 | 0.03555 | 39.532  | 0.06278  |
| 33.9  | 0.02733 | 39.6107 | 0.01321  |
| 33.92 | 0.01013 | 39.6303 | 0.01961  |
| 33.94 | 0.04053 | 39.65   | 0.00975  |
| 33.96 | 0.03741 | 39.6696 | 0.0434   |
| 33.98 | 0.03308 | 39.7089 | -0.02116 |
| 34    | 0.02696 | 39.7482 | 0.03472  |
| 34.02 | 0.06125 | 39.7679 | 0.07234  |
| 34.04 | 0.03956 | 39.7875 | 0.02246  |
| 34.06 | 0.03673 | 39.8072 | 0.04953  |
| 34.08 | 0.01115 | 39.8269 | 0.03176  |
| 34.1  | 0.03916 | 39.8465 | 0.01398  |
| 34.12 | 0.04411 | 39.9055 | 0.00373  |
| 34.14 | 0.02482 | 39.9251 | 0.01144  |
| 34.16 | 0.02858 | 39.9448 | 0.07236  |
| 34.18 | 0.02275 | 39.9644 | 0.00798  |
| 34.2  | 0.02082 | 39.9841 | 0.09395  |
| 34.22 | 0.03087 | 40.0037 | 0.00452  |
| 34.24 | 0.04391 | 40.0234 | 0.01004  |
| 34.26 | 0.04467 | 40.043  | 0.05249  |
| 34.28 | 0.04903 | 40.0627 | 0.01405  |
| 34.3  | 0.0471  | 40.0823 | 0.11848  |
| 34.32 | 0.00145 | 40.102  | 0.06598  |
| 34.34 | 0.05731 | 40.1217 | 0.20339  |
| 34.36 | 0.02663 | 40.1413 | 0.12714  |
| 34.38 | 0.03069 | 40.161  | 0.14409  |
| 34.4  | 0.02936 | 40.1806 | 0.22786  |
| 34.42 | 0.04749 | 40.2003 | 0.33098  |
| 34.44 | 0.04825 | 40.2199 | 0.31056  |
| 34.46 | 0.02686 | 40.2396 | 0.38467  |
| 34.48 | 0.02942 | 40.2592 | 0.36029  |
| 34.5  | 0.03707 | 40.2789 | 0.35571  |
| 34.52 | 0.03125 | 40.2985 | 0.35111  |
| 34.54 | 0.02932 | 40.3182 | 0.4195   |
| 34.56 | 0.00613 | 40.3378 | 0.41447  |
| 34.58 | 0.03833 | 40.3575 | 0.53737  |
| 34.6  | 0.02562 | 40.3772 | 0.58686  |
| 34.62 | 0.0189  | 40.3968 | 0.62974  |
| 34.64 | 0.04002 | 40.4165 | 0.85947  |

|       |         |         |         |
|-------|---------|---------|---------|
| 34.66 | 0.04109 | 40.4361 | 0.91554 |
| 34.68 | 0.04005 | 40.4558 | 0.95272 |
| 34.7  | 0.02794 | 40.4754 | 1       |
| 34.72 | 0.05326 | 40.4951 | 0.98267 |
| 34.74 | 0.05163 | 40.5147 | 0.97192 |
| 34.76 | 0.03592 | 40.5344 | 0.85172 |
| 34.78 | 0.03399 | 40.554  | 0.86515 |
| 34.8  | 0.01799 | 40.5737 | 0.79022 |
| 34.82 | 0.05259 | 40.5933 | 0.77376 |
| 34.84 | 0.02072 | 40.613  | 0.61531 |
| 34.86 | 0.03226 | 40.6327 | 0.57204 |
| 34.88 | 0.04739 | 40.6523 | 0.50195 |
| 34.9  | 0.04636 | 40.672  | 0.38174 |
| 34.92 | 0.01748 | 40.6916 | 0.34154 |
| 34.94 | 0.05238 | 40.7113 | 0.23717 |
| 34.96 | 0.04386 | 40.7309 | 0.30819 |
| 34.98 | 0.02247 | 40.7506 | 0.19634 |
| 35    | 0.0165  | 40.7702 | 0.24494 |
| 35.02 | 0.03014 | 40.7899 | 0.16606 |
| 35.04 | 0.02523 | 40.8095 | 0.11355 |
| 35.06 | 0.02241 | 40.8292 | 0.14017 |
| 35.08 | 0.02797 | 40.8488 | 0.1136  |
| 35.1  | 0.0479  | 40.8685 | 0.07912 |
| 35.12 | 0.03131 | 40.8881 | 0.02881 |
| 35.14 | 0.0246  | 40.9078 | 0.02071 |
| 35.16 | 0.03615 | 40.9275 | 0.06975 |
| 35.18 | 0.03902 | 40.9471 | 0.08187 |
| 35.2  | 0.04698 | 40.9668 | 0.14058 |
| 35.22 | 0.01901 | 40.9864 | 0.05159 |
| 35.24 | 0.03775 | 41.0061 | 0.0303  |
| 35.26 | 0.02684 | 41.0257 | 0.09253 |
| 35.28 | 0.0333  | 41.0454 | 0.11827 |
| 35.3  | 0.05713 | 41.065  | 0.1084  |
| 35.32 | 0.05581 | 41.0847 | 0.07129 |
| 35.34 | 0.03143 | 41.1043 | 0.05439 |
| 35.36 | 0.04268 | 41.124  | 0.02958 |
| 35.38 | 0.05333 | 41.1436 | 0.03378 |
| 35.4  | 0.01938 | 41.1633 | 0.06832 |
| 35.42 | 0.02135 | 41.183  | 0.04922 |
| 35.44 | 0.03949 | 41.2026 | 0.08639 |
| 35.46 | 0.05313 | 41.2223 | 0.04972 |
| 35.48 | 0.04043 | 41.2419 | 0.04425 |
| 35.5  | 0.03791 | 41.2616 | 0.11659 |
| 35.52 | 0.01593 | 41.2812 | 0.11552 |
| 35.54 | 0.04604 | 41.3009 | 0.01993 |
| 35.56 | 0.05221 | 41.3205 | 0.13403 |
| 35.58 | 0.04969 | 41.3402 | 0.01075 |



|       |         |         |         |
|-------|---------|---------|---------|
| 35.6  | 0.05345 | 41.3598 | 0.02902 |
| 35.62 | 0.04644 | 41.3991 | 0.10732 |
| 35.64 | 0.04542 | 41.4385 | 0.02386 |
| 35.66 | 0.03781 | 41.4581 | 0.05268 |
| 35.68 | 0.04367 | 41.4778 | 0.07798 |
| 35.7  | 0.03935 | 41.4974 | 0.0391  |
| 35.72 | 0.02755 | 41.5171 | 0.06353 |
| 35.74 | 0.01455 | 41.5367 | 0.06949 |
| 35.76 | 0.03508 | 41.5564 | 0.10403 |
| 35.78 | 0.04334 | 41.576  | 0.00976 |
| 35.8  | 0.03663 | 41.6153 | 0.03838 |
| 35.82 | 0.03022 | 41.635  | 0.07732 |
| 35.84 | 0.04207 | 41.6546 | 0.1057  |
| 35.86 | 0.04284 | 41.6743 | 0.03649 |
| 35.88 | 0.02834 | 41.694  | 0.07103 |
| 35.9  | 0.03391 | 41.7136 | 0.02116 |
| 35.92 | 0.04755 | 41.7333 | 0.05218 |
| 35.94 | 0.03545 | 41.7529 | 0.07836 |
| 35.96 | 0.0476  | 41.7726 | 0.0452  |
| 35.98 | 0.04838 | 41.7922 | 0.09424 |
| 36    | 0.06681 | 41.8315 | 0.05648 |
| 36.02 | 0.02956 | 41.8512 | 0.01058 |
| 36.04 | 0.03034 | 41.8708 | 0.12995 |
| 36.06 | 0.05805 | 41.8905 | 0.02074 |
| 36.08 | 0.0705  | 41.9101 | 0.09748 |
| 36.1  | 0.04014 | 41.9298 | 0.03178 |
| 36.12 | 0.06696 | 41.9494 | 0.10193 |
| 36.14 | 0.06743 | 41.9691 | 0.09954 |
| 36.16 | 0.03318 | 41.9888 | 0.01362 |
| 36.18 | 0.05371 | 42.0084 | 0.0398  |
| 36.2  | 0.04999 | 42.0281 | 0.09632 |
| 36.22 | 0.07112 | 42.0477 | 0.05744 |
| 36.24 | 0.05154 | 42.0674 | 0.03307 |
| 36.26 | 0.05321 | 42.1263 | 0.04348 |
| 36.28 | 0.07344 | 42.146  | 0.09033 |
| 36.3  | 0.05026 | 42.1656 | 0.10112 |
| 36.32 | 0.06361 | 42.1853 | 0.03279 |
| 36.34 | 0.05001 | 42.2049 | 0.02952 |
| 36.36 | 0.04809 | 42.2246 | 0.06934 |
| 36.38 | 0.04736 | 42.2443 | 0.03442 |
| 36.4  | 0.05592 | 42.2639 | 0.07071 |
| 36.42 | 0.0558  | 42.2836 | 0.10613 |
| 36.44 | 0.05807 | 42.3032 | 0.06197 |
| 36.46 | 0.04626 | 42.3229 | 0.07409 |
| 36.48 | 0.04853 | 42.3425 | 0.09411 |
| 36.5  | 0.08284 | 42.3622 | 0.08074 |
| 36.52 | 0.04978 | 42.3818 | 0.06032 |

|       |         |         |         |
|-------|---------|---------|---------|
| 36.54 | 0.05265 | 42.4015 | 0.03947 |
| 36.56 | 0.066   | 42.4211 | 0.05378 |
| 36.58 | 0.05958 | 42.4408 | 0.08128 |
| 36.6  | 0.05826 | 42.4801 | 0.07826 |
| 36.62 | 0.04855 | 42.4998 | 0.08906 |
| 36.64 | 0.06909 | 42.5194 | 0.12359 |
| 36.66 | 0.06297 | 42.5391 | 0.07417 |
| 36.68 | 0.04997 | 42.5587 | 0.13024 |
| 36.7  | 0.05195 | 42.5784 | 0.05488 |
| 36.72 | 0.04643 | 42.598  | 0.02742 |
| 36.74 | 0.0496  | 42.6177 | 0.13538 |
| 36.76 | 0.04887 | 42.6373 | 0.07364 |
| 36.78 | 0.03647 | 42.657  | 0.11125 |
| 36.8  | 0.05491 | 42.6766 | 0.07985 |
| 36.82 | 0.06257 | 42.6963 | 0.08933 |
| 36.84 | 0.03939 | 42.7159 | 0.11155 |
| 36.86 | 0.06382 | 42.7356 | 0.1118  |
| 36.88 | 0.06429 | 42.7553 | 0.14986 |
| 36.9  | 0.06386 | 42.7749 | 0.09119 |
| 36.92 | 0.0335  | 42.7946 | 0.05803 |
| 36.94 | 0.05643 | 42.8142 | 0.04992 |
| 36.96 | 0.06109 | 42.8339 | 0.08314 |
| 36.98 | 0.05199 | 42.8535 | 0.11328 |
| 37    | 0.05785 | 42.8732 | 0.10474 |
| 37.02 | 0.07329 | 42.8928 | 0.08784 |
| 37.04 | 0.07167 | 42.9125 | 0.08325 |
| 37.06 | 0.07214 | 42.9321 | 0.09097 |
| 37.08 | 0.06813 | 42.9518 | 0.07319 |
| 37.1  | 0.06321 | 42.9714 | 0.05102 |
| 37.12 | 0.0574  | 42.9911 | 0.06313 |
| 37.14 | 0.05517 | 43.0107 | 0.13987 |
| 37.16 | 0.06463 | 43.0304 | 0.07022 |
| 37.18 | 0.05852 | 43.0501 | 0.09289 |
| 37.2  | 0.07426 | 43.0697 | 0.05313 |
| 37.22 | 0.06904 | 43.0894 | 0.05778 |
| 37.24 | 0.06682 | 43.109  | 0.08791 |
| 37.26 | 0.0658  | 43.1483 | 0.12753 |
| 37.28 | 0.06268 | 43.168  | 0.07898 |
| 37.3  | 0.05866 | 43.1876 | 0.07703 |
| 37.32 | 0.05718 | 43.2073 | 0.12564 |
| 37.34 | 0.05659 | 43.2269 | 0.12632 |
| 37.36 | 0.05989 | 43.2662 | 0.05384 |
| 37.38 | 0.07188 | 43.2859 | 0.09893 |
| 37.4  | 0.0656  | 43.3056 | 0.0939  |
| 37.42 | 0.0692  | 43.3252 | 0.09986 |
| 37.44 | 0.0749  | 43.3645 | 0.10211 |
| 37.46 | 0.08688 | 43.3842 | 0.03598 |

|       |         |         |         |
|-------|---------|---------|---------|
| 37.48 | 0.06593 | 43.4038 | 0.10041 |
| 37.5  | 0.08929 | 43.4235 | 0.07868 |
| 37.52 | 0.08421 | 43.4431 | 0.05562 |
| 37.54 | 0.07255 | 43.4628 | 0.06598 |
| 37.56 | 0.07854 | 43.4824 | 0.05875 |
| 37.58 | 0.07616 | 43.5217 | 0.03331 |
| 37.6  | 0.09353 | 43.5414 | 0.12104 |
| 37.62 | 0.09384 | 43.5611 | 0.087   |
| 37.64 | 0.09235 | 43.5807 | 0.12461 |
| 37.66 | 0.08398 | 43.6004 | 0.04309 |
| 37.68 | 0.09357 | 43.62   | 0.09653 |
| 37.7  | 0.10765 | 43.6397 | 0.0515  |
| 37.72 | 0.10406 | 43.6593 | 0.13571 |
| 37.74 | 0.09958 | 43.679  | 0.09815 |
| 37.76 | 0.08672 | 43.6986 | 0.03861 |
| 37.78 | 0.0987  | 43.7183 | 0.07007 |
| 37.8  | 0.12116 | 43.7379 | 0.09229 |
| 37.82 | 0.11309 | 43.7576 | 0.1365  |
| 37.84 | 0.12717 | 43.7969 | 0.06798 |
| 37.86 | 0.14844 | 43.8166 | 0.11219 |
| 37.88 | 0.14216 | 43.8559 | 0.10916 |
| 37.9  | 0.14037 | 43.8755 | 0.06017 |
| 37.92 | 0.15325 | 43.9148 | 0.14287 |
| 37.94 | 0.16913 | 43.9345 | 0.12686 |
| 37.96 | 0.18052 | 43.9738 | 0.06844 |
| 37.98 | 0.19969 | 43.9934 | 0.0744  |
| 38    | 0.21317 | 44.0131 | 0.05882 |
| 38.02 | 0.22036 | 44.0524 | 0.04657 |
| 38.04 | 0.22905 | 44.072  | 0.04901 |
| 38.06 | 0.25481 | 44.0917 | 0.03915 |
| 38.08 | 0.28596 | 44.1114 | 0.12776 |
| 38.1  | 0.31351 | 44.131  | 0.12273 |
| 38.12 | 0.31472 | 44.1703 | 0.04365 |
| 38.14 | 0.30574 | 44.19   | 0.0672  |
| 38.16 | 0.35096 | 44.2096 | 0.04283 |
| 38.18 | 0.34558 | 44.2293 | 0.05495 |
| 38.2  | 0.35098 | 44.2489 | 0.07321 |
| 38.22 | 0.3471  | 44.2686 | 0.04049 |
| 38.24 | 0.33303 | 44.2882 | 0.04249 |
| 38.26 | 0.3525  | 44.3079 | 0.12231 |
| 38.28 | 0.33455 | 44.3275 | 0.11245 |
| 38.3  | 0.28905 | 44.3472 | 0.0573  |
| 38.32 | 0.30822 | 44.3669 | 0.14811 |
| 38.34 | 0.30464 | 44.3865 | 0.03538 |
| 38.36 | 0.27231 | 44.4062 | 0.02464 |
| 38.38 | 0.26424 | 44.4258 | 0.08774 |
| 38.4  | 0.25466 | 44.4455 | 0.12536 |

|       |         |         |         |
|-------|---------|---------|---------|
| 38.42 | 0.23072 | 44.4651 | 0.11286 |
| 38.44 | 0.21696 | 44.4848 | 0.06519 |
| 38.46 | 0.20739 | 44.5044 | 0.13797 |
| 38.48 | 0.18943 | 44.5241 | 0.04282 |
| 38.5  | 0.20561 | 44.5437 | 0.02108 |
| 38.52 | 0.19035 | 44.5634 | 0.11057 |
| 38.54 | 0.16221 | 44.583  | 0.0651  |
| 38.56 | 0.16941 | 44.6027 | 0.09612 |
| 38.58 | 0.15325 | 44.6224 | 0.07483 |
| 38.6  | 0.12901 | 44.642  | 0.06057 |
| 38.62 | 0.14878 | 44.6617 | 0.05774 |
| 38.64 | 0.14789 | 44.6813 | 0.03732 |
| 38.66 | 0.11975 | 44.701  | 0.04592 |
| 38.68 | 0.12904 | 44.7206 | 0.06727 |
| 38.7  | 0.1066  | 44.7403 | 0.06356 |
| 38.72 | 0.13864 | 44.7599 | 0.09677 |
| 38.74 | 0.11799 | 44.7796 | 0.04251 |
| 38.76 | 0.11201 | 44.7992 | 0.06693 |
| 38.78 | 0.1252  | 44.8189 | 0.07422 |
| 38.8  | 0.12281 | 44.8385 | 0.10699 |
| 38.82 | 0.10845 | 44.8582 | 0.07955 |
| 38.84 | 0.12103 | 44.8779 | 0.05122 |
| 38.86 | 0.10338 | 44.8975 | 0.09806 |
| 38.88 | 0.12464 | 44.9172 | 0.07941 |
| 38.9  | 0.11807 | 44.9368 | 0.1179  |
| 38.92 | 0.12346 | 44.9565 | 0.12079 |
| 38.94 | 0.10192 | 44.9958 | 0.10326 |
| 38.96 | 0.12797 | 45.0154 | 0.11801 |
| 38.98 | 0.08696 | 45.0351 | 0.10419 |
| 39    | 0.08667 | 45.0547 | 0.08993 |
| 39.02 | 0.10794 | 45.0744 | 0.1293  |
| 39.04 | 0.09178 | 45.094  | 0.0236  |
| 39.06 | 0.11904 | 45.1137 | 0.08407 |
| 39.08 | 0.11815 | 45.1333 | 0.12476 |
| 39.1  | 0.11396 | 45.153  | 0.0494  |
| 39.12 | 0.09661 | 45.1727 | 0.08438 |
| 39.14 | 0.11039 | 45.1923 | 0.06308 |
| 39.16 | 0.11399 | 45.212  | 0.09015 |
| 39.18 | 0.11729 | 45.2316 | 0.09391 |
| 39.2  | 0.11581 | 45.2513 | 0.08317 |
| 39.22 | 0.10983 | 45.2709 | 0.09704 |
| 39.24 | 0.11672 | 45.2906 | 0.08454 |
| 39.26 | 0.11463 | 45.3102 | 0.07115 |
| 39.28 | 0.11255 | 45.3299 | 0.08855 |
| 39.3  | 0.12902 | 45.3495 | 0.06593 |
| 39.32 | 0.15209 | 45.3692 | 0.06135 |
| 39.34 | 0.12665 | 45.3888 | 0.09412 |

|       |         |         |         |
|-------|---------|---------|---------|
| 39.36 | 0.13863 | 45.4085 | 0.11415 |
| 39.38 | 0.16199 | 45.4282 | 0.0977  |
| 39.4  | 0.1614  | 45.4478 | 0.06937 |
| 39.42 | 0.16171 | 45.4675 | 0.08808 |
| 39.44 | 0.171   | 45.4871 | 0.1169  |
| 39.46 | 0.18358 | 45.5068 | 0.07626 |
| 39.48 | 0.17461 | 45.5264 | 0.03211 |
| 39.5  | 0.20546 | 45.5461 | 0.0706  |
| 39.52 | 0.20337 | 45.5657 | 0.04711 |
| 39.54 | 0.21835 | 45.5854 | 0.13352 |
| 39.56 | 0.23812 | 45.605  | 0.06826 |
| 39.58 | 0.24531 | 45.6247 | 0.07554 |
| 39.6  | 0.29053 | 45.6443 | 0.01864 |
| 39.62 | 0.30431 | 45.664  | 0.11209 |
| 39.64 | 0.3157  | 45.6837 | 0.09167 |
| 39.66 | 0.36541 | 45.7033 | 0.10554 |
| 39.68 | 0.37919 | 45.723  | 0.0592  |
| 39.7  | 0.40225 | 45.7426 | 0.05988 |
| 39.72 | 0.45076 | 45.7623 | 0.07156 |
| 39.74 | 0.46724 | 45.7819 | 0.05378 |
| 39.76 | 0.50407 | 45.8016 | 0.06897 |
| 39.78 | 0.57743 | 45.8212 | 0.06438 |
| 39.8  | 0.61666 | 45.8409 | 0.0598  |
| 39.82 | 0.64182 | 45.8605 | 0.0385  |
| 39.84 | 0.67805 | 45.8802 | 0.04798 |
| 39.86 | 0.72028 | 45.9195 | 0.12892 |
| 39.88 | 0.77148 | 45.9392 | 0.03685 |
| 39.9  | 0.84364 | 45.9785 | 0.04482 |
| 39.92 | 0.84126 | 45.9981 | 0.03803 |
| 39.94 | 0.86821 | 46.0178 | 0.10246 |
| 39.96 | 0.89637 | 46.0374 | 0.07281 |
| 39.98 | 0.96523 | 46.0571 | 0.11702 |
| 40    | 0.97423 | 46.0767 | 0.05924 |
| 40.02 | 0.98202 | 46.0964 | 0.10301 |
| 40.04 | 0.97604 | 46.116  | 0.08347 |
| 40.06 | 1       | 46.1357 | 0.11273 |
| 40.08 | 0.98115 | 46.1553 | 0.03736 |
| 40.1  | 0.96738 | 46.175  | 0.0552  |
| 40.12 | 0.97637 | 46.1946 | 0.05237 |
| 40.14 | 0.90004 | 46.2143 | 0.05833 |
| 40.16 | 0.8731  | 46.234  | 0.05418 |
| 40.18 | 0.81982 | 46.2536 | 0.07817 |
| 40.2  | 0.7327  | 46.2733 | 0.03006 |
| 40.22 | 0.69739 | 46.2929 | 0.01931 |
| 40.24 | 0.6477  | 46.3126 | 0.04462 |
| 40.26 | 0.58663 | 46.3322 | 0.04618 |
| 40.28 | 0.52855 | 46.4305 | 0.08097 |

|       |         |         |         |
|-------|---------|---------|---------|
| 40.3  | 0.53006 | 46.4501 | 0.06738 |
| 40.32 | 0.46061 | 46.4698 | 0.1149  |
| 40.34 | 0.4208  | 46.4895 | 0.11583 |
| 40.36 | 0.37919 | 46.5091 | 0.07191 |
| 40.38 | 0.34058 | 46.5288 | 0.09393 |
| 40.4  | 0.32143 | 46.5484 | 0.11859 |
| 40.42 | 0.32323 | 46.5681 | 0.13974 |
| 40.44 | 0.25468 | 46.5877 | 0.10769 |
| 40.46 | 0.23613 | 46.6074 | 0.16928 |
| 40.48 | 0.18883 | 46.627  | 0.1614  |
| 40.5  | 0.22088 | 46.6467 | 0.1443  |
| 40.52 | 0.18676 | 46.6663 | 0.18787 |
| 40.54 | 0.17688 | 46.686  | 0.13076 |
| 40.56 | 0.1712  | 46.7056 | 0.2174  |
| 40.58 | 0.16493 | 46.7253 | 0.19019 |
| 40.6  | 0.13021 | 46.745  | 0.26453 |
| 40.62 | 0.15686 | 46.7646 | 0.31337 |
| 40.64 | 0.12903 | 46.7843 | 0.27649 |
| 40.66 | 0.13203 | 46.8039 | 0.29763 |
| 40.68 | 0.11587 | 46.8236 | 0.34383 |
| 40.7  | 0.1045  | 46.8432 | 0.27398 |
| 40.72 | 0.08445 | 46.8629 | 0.26611 |
| 40.74 | 0.10063 | 46.8825 | 0.31011 |
| 40.76 | 0.09196 | 46.9022 | 0.44687 |
| 40.78 | 0.09975 | 46.9218 | 0.36163 |
| 40.8  | 0.10844 | 46.9415 | 0.3797  |
| 40.82 | 0.0818  | 46.9611 | 0.38985 |
| 40.84 | 0.07403 | 46.9808 | 0.44836 |
| 40.86 | 0.06865 | 47.0005 | 0.46028 |
| 40.88 | 0.05728 | 47.0201 | 0.47263 |
| 40.9  | 0.07136 | 47.0398 | 0.51927 |
| 40.92 | 0.07796 | 47.0594 | 0.50348 |
| 40.94 | 0.09204 | 47.0791 | 0.48858 |
| 40.96 | 0.09085 | 47.0987 | 0.47719 |
| 40.98 | 0.07259 | 47.1184 | 0.50581 |
| 41    | 0.08548 | 47.138  | 0.50058 |
| 41.02 | 0.07501 | 47.1577 | 0.42281 |
| 41.04 | 0.04747 | 47.1773 | 0.39296 |
| 41.06 | 0.06754 | 47.197  | 0.42641 |
| 41.08 | 0.06096 | 47.2166 | 0.34073 |
| 41.1  | 0.07744 | 47.2363 | 0.36847 |
| 41.12 | 0.06248 | 47.2559 | 0.33554 |
| 41.14 | 0.06099 | 47.2756 | 0.36372 |
| 41.16 | 0.05321 | 47.2953 | 0.24639 |
| 41.18 | 0.07149 | 47.3149 | 0.22401 |
| 41.2  | 0.06162 | 47.3346 | 0.24252 |
| 41.22 | 0.0754  | 47.3542 | 0.14277 |

|       |         |         |          |
|-------|---------|---------|----------|
| 41.24 | 0.05924 | 47.3739 | 0.20216  |
| 41.26 | 0.04907 | 47.3935 | 0.2211   |
| 41.28 | 0.05896 | 47.4132 | 0.19345  |
| 41.3  | 0.05567 | 47.4328 | 0.16404  |
| 41.32 | 0.05359 | 47.4525 | 0.14123  |
| 41.34 | 0.05719 | 47.4721 | 0.14215  |
| 41.36 | 0.04821 | 47.4918 | 0.15934  |
| 41.38 | 0.04104 | 47.5114 | 0.17256  |
| 41.4  | 0.05362 | 47.5311 | 0.11986  |
| 41.42 | 0.02459 | 47.5508 | 0.03813  |
| 41.44 | 0.06382 | 47.5704 | 0.12082  |
| 41.46 | 0.0294  | 47.5901 | 0.05141  |
| 41.48 | 0.05905 | 47.6097 | 0.03035  |
| 41.5  | 0.05007 | 47.6294 | 0.08974  |
| 41.52 | 0.06086 | 47.649  | 0.16979  |
| 41.54 | 0.04889 | 47.6687 | 0.04542  |
| 41.56 | 0.03812 | 47.6883 | 0.05865  |
| 41.58 | 0.04412 | 47.708  | 0.09782  |
| 41.6  | 0.05191 | 47.7276 | 0.06138  |
| 41.62 | 0.04594 | 47.7473 | 0.06098  |
| 41.64 | 0.05133 | 47.7669 | 0.05091  |
| 41.66 | 0.04955 | 47.7866 | 0.0404   |
| 41.68 | 0.04237 | 47.8063 | 0.01803  |
| 41.7  | 0.03879 | 47.8259 | 0.0695   |
| 41.72 | 0.04119 | 47.8456 | 0.0968   |
| 41.74 | 0.02803 | 47.8652 | 0.04409  |
| 41.76 | 0.05348 | 47.8849 | 0.03447  |
| 41.78 | 0.04242 | 47.9045 | 0.06836  |
| 41.8  | 0.02895 | 47.9242 | 0.0051   |
| 41.82 | 0.03405 | 47.9438 | -0.01289 |
| 41.84 | 0.03675 | 47.9635 | 0.0764   |
| 41.86 | 0.05712 | 47.9831 | 0.05534  |
| 41.88 | 0.04066 | 48.0028 | 0.06593  |
| 41.9  | 0.07241 | 48.0224 | 0.0352   |
| 41.92 | 0.0293  | 48.0421 | 0.00623  |
| 41.94 | 0.04967 | 48.0618 | 0.0265   |
| 41.96 | 0.04699 | 48.0814 | 0.05248  |
| 41.98 | 0.02813 | 48.1011 | 0.05516  |
| 42    | 0.03772 | 48.1207 | 0.06399  |
| 42.02 | 0.03294 | 48.1404 | 0.0891   |
| 42.04 | 0.04253 | 48.16   | 0.05616  |
| 42.06 | 0.03865 | 48.1797 | 0.07643  |
| 42.08 | 0.04225 | 48.1993 | 0.0035   |
| 42.1  | 0.03028 | 48.219  | 0.04399  |
| 42.12 | 0.03838 | 48.2386 | 0.04754  |
| 42.14 | 0.03599 | 48.2583 | 0.13991  |
| 42.16 | 0.02432 | 48.2779 | 0.04895  |

|       |         |         |          |
|-------|---------|---------|----------|
| 42.18 | 0.03361 | 48.2976 | 0.02833  |
| 42.2  | 0.04709 | 48.3172 | 0.00991  |
| 42.22 | 0.02555 | 48.3369 | 0.00512  |
| 42.24 | 0.04262 | 48.3566 | -0.00803 |
| 42.26 | 0.03754 | 48.3762 | 0.01663  |
| 42.28 | 0.03995 | 48.3959 | 0.09669  |
| 42.3  | 0.01451 | 48.4155 | -0.01801 |
| 42.32 | 0.03817 | 48.4548 | 0.06604  |
| 42.34 | 0.02919 | 48.4745 | 0.01069  |
| 42.36 | 0.04657 | 48.4941 | 0.01821  |
| 42.38 | 0.04837 | 48.5138 | 0.01254  |
| 42.4  | 0.03042 | 48.5334 | 0.03895  |
| 42.42 | 0.04869 | 48.5531 | 0.06186  |
| 42.44 | 0.02325 | 48.5727 | 0.0641   |
| 42.46 | 0.01368 | 48.5924 | 0.05755  |
| 42.48 | 0.04093 | 48.6121 | 0.00528  |
| 42.5  | 0.03885 | 48.6317 | 0.04357  |
| 42.52 | 0.05382 | 48.671  | 0.0841   |
| 42.54 | 0.04455 | 48.6907 | 0.02348  |
| 42.56 | 0.0263  | 48.7103 | 0.08638  |
| 42.58 | 0.0317  | 48.73   | 0.03323  |
| 42.6  | 0.04608 | 48.7496 | 0.07108  |
| 42.62 | 0.0368  | 48.7693 | 0.01925  |
| 42.64 | 0.0422  | 48.7889 | 0.03819  |
| 42.66 | 0.02844 | 48.8086 | 0.00219  |
| 42.68 | 0.03773 | 48.8282 | 0.02729  |
| 42.7  | 0.03714 | 48.8479 | 0.02338  |
| 42.72 | 0.03775 | 48.8676 | 0.00452  |
| 42.74 | 0.03836 | 48.8872 | 0.0283   |
| 42.76 | 0.02878 | 48.9069 | 0.02527  |
| 42.78 | 0.05364 | 48.9265 | 0.03014  |
| 42.8  | 0.03209 | 48.9462 | -0.01289 |
| 42.82 | 0.05037 | 48.9658 | 0.04342  |
| 42.84 | 0.05247 | 48.9855 | 0.04346  |
| 42.86 | 0.03122 | 49.0051 | 0.05405  |
| 42.88 | 0.048   | 49.0248 | 0.03651  |
| 42.9  | 0.04531 | 49.0444 | 0.06337  |
| 42.92 | 0.04592 | 49.0641 | -0.00736 |
| 42.94 | 0.06389 | 49.0837 | 0.04675  |
| 42.96 | 0.03007 | 49.1034 | 0.07976  |
| 42.98 | 0.04565 | 49.1231 | 0.04684  |
| 43    | 0.05434 | 49.1427 | 0.0671   |
| 43.02 | 0.04686 | 49.1624 | 0.01571  |
| 43.04 | 0.03999 | 49.182  | 0.08521  |
| 43.06 | 0.05347 | 49.2017 | 0.04393  |
| 43.08 | 0.04629 | 49.2213 | 0.01276  |
| 43.1  | 0.0487  | 49.241  | 0.03127  |



|       |         |         |          |
|-------|---------|---------|----------|
| 43.12 | 0.05469 | 49.2606 | 0.02867  |
| 43.14 | 0.06967 | 49.2803 | 0.05817  |
| 43.16 | 0.05052 | 49.2999 | 0.0037   |
| 43.18 | 0.05741 | 49.3196 | 0.0754   |
| 43.2  | 0.04245 | 49.3392 | 0.02445  |
| 43.22 | 0.05534 | 49.3589 | 0.01042  |
| 43.24 | 0.04906 | 49.3785 | 0.07157  |
| 43.26 | 0.04817 | 49.3982 | 0.05491  |
| 43.28 | 0.04698 | 49.4179 | 0.02682  |
| 43.3  | 0.0425  | 49.4375 | 0.03609  |
| 43.32 | 0.05987 | 49.4572 | 0.02998  |
| 43.34 | 0.03443 | 49.4768 | 0.0076   |
| 43.36 | 0.0533  | 49.4965 | 0.03798  |
| 43.38 | 0.05032 | 49.5161 | 0.02395  |
| 43.4  | 0.05662 | 49.5358 | 0.07543  |
| 43.42 | 0.04734 | 49.5554 | 0.0425   |
| 43.44 | 0.05394 | 49.5751 | 0.05398  |
| 43.46 | 0.04886 | 49.5947 | 0.07864  |
| 43.48 | 0.04947 | 49.6144 | -0.0088  |
| 43.5  | 0.05157 | 49.6537 | 0.06778  |
| 43.52 | 0.03092 | 49.6734 | 0.01815  |
| 43.54 | 0.03213 | 49.693  | 0.04412  |
| 43.56 | 0.04292 | 49.7127 | 0.00636  |
| 43.58 | 0.03933 | 49.752  | 0.03019  |
| 43.6  | 0.04473 | 49.7716 | 0.08826  |
| 43.62 | 0.02438 | 49.7913 | 0.00565  |
| 43.64 | 0.04654 | 49.8109 | 0.01009  |
| 43.66 | 0.05404 | 49.8306 | -0.01404 |
| 43.68 | 0.04417 | 49.8502 | 0.01941  |
| 43.7  | 0.05166 | 49.8699 | -0.00121 |
| 43.72 | 0.0358  | 49.8895 | 0.0296   |
| 43.74 | 0.03731 | 49.9092 | 0.038    |
| 43.76 | 0.03971 | 49.9289 | 0.02838  |
| 43.78 | 0.0475  | 49.9485 | 0.03721  |
| 43.8  | 0.05111 | 49.9682 | 0.01307  |
| 43.82 | 0.03405 | 49.9878 | 0.01443  |
| 43.84 | 0.06011 | 50.0075 | 0.06855  |
| 43.86 | 0.05562 | 50.0197 | 0.0445   |
| 43.88 | 0.05444 | 50.0393 | 0.02784  |
| 43.9  | 0.05594 | 50.059  | 0.03096  |
| 43.92 | 0.04308 | 50.0786 | 0.07804  |
| 43.94 | 0.04249 | 50.0983 | 0.04951  |
| 43.96 | 0.04818 | 50.1179 | 0.03065  |
| 43.98 | 0.04969 | 50.1572 | -0.0018  |
| 44    | 0.04251 | 50.1965 | 0.04137  |
| 44.02 | 0.05689 | 50.2162 | 0.00625  |
| 44.04 | 0.06888 | 50.2358 | -0.0113  |

|       |         |         |          |
|-------|---------|---------|----------|
| 44.06 | 0.08476 | 50.2555 | 0.04106  |
| 44.08 | 0.0692  | 50.2752 | 0.0433   |
| 44.1  | 0.05753 | 50.2948 | 0.00202  |
| 44.12 | 0.07191 | 50.3145 | 0.05526  |
| 44.14 | 0.0791  | 50.3341 | 0.072    |
| 44.16 | 0.06384 | 50.3538 | 0.05183  |
| 44.18 | 0.08152 | 50.3734 | 0.05275  |
| 44.2  | 0.07913 | 50.3931 | 0.00312  |
| 44.22 | 0.08932 | 50.4127 | 0.02602  |
| 44.24 | 0.08514 | 50.4324 | 0.05991  |
| 44.26 | 0.09053 | 50.452  | -0.00511 |
| 44.28 | 0.08455 | 50.4717 | 0.02395  |
| 44.3  | 0.07768 | 50.4913 | 0.05124  |
| 44.32 | 0.08397 | 50.511  | 0.03722  |
| 44.34 | 0.07829 | 50.5306 | 0.0355   |
| 44.36 | 0.08968 | 50.5503 | 0.03995  |
| 44.38 | 0.08849 | 50.57   | 0.08791  |
| 44.4  | 0.10437 | 50.5896 | 0.02157  |
| 44.42 | 0.10318 | 50.6093 | 0.06381  |
| 44.44 | 0.09421 | 50.6289 | 0.08144  |
| 44.46 | 0.09481 | 50.6486 | 0.02434  |
| 44.48 | 0.09393 | 50.6682 | 0.04855  |
| 44.5  | 0.08884 | 50.6879 | 0.06267  |
| 44.52 | 0.07778 | 50.7075 | 0.03941  |
| 44.54 | 0.09126 | 50.7272 | 0.03813  |
| 44.56 | 0.07779 | 50.7468 | -0.01238 |
| 44.58 | 0.0781  | 50.7665 | 0.02503  |
| 44.6  | 0.07871 | 50.7861 | 0.00265  |
| 44.62 | 0.0889  | 50.8058 | 0.00753  |
| 44.64 | 0.07364 | 50.8255 | 0.03395  |
| 44.66 | 0.06796 | 50.8451 | 0.0463   |
| 44.68 | 0.05629 | 50.8648 | 0.05206  |
| 44.7  | 0.0554  | 50.8844 | 0.02089  |
| 44.72 | 0.05002 | 50.9041 | 0.04687  |
| 44.74 | 0.04794 | 50.9237 | 0.05834  |
| 44.76 | 0.05812 | 50.9434 | 0.05927  |
| 44.78 | 0.05694 | 50.963  | 0.03997  |
| 44.8  | 0.05694 | 50.9827 | 0.0343   |
| 44.82 | 0.0333  | 51.0023 | 0.06335  |
| 44.84 | 0.05996 | 51.022  | 0.06735  |
| 44.86 | 0.0447  | 51.0416 | 0.09685  |
| 44.88 | 0.02495 | 51.0613 | 0.0881   |
| 44.9  | 0.03034 | 51.081  | 0.08726  |
| 44.92 | 0.04263 | 51.1203 | 0.0579   |
| 44.94 | 0.02168 | 51.1399 | 0.00167  |
| 44.96 | 0.0636  | 51.1596 | 0.0105   |
| 44.98 | 0.05553 | 51.1792 | 0.11033  |

|       |         |         |           |
|-------|---------|---------|-----------|
| 45    | 0.03308 | 51.2185 | 0.11965   |
| 45.02 | 0.02441 | 51.2382 | 0.06211   |
| 45.04 | 0.0355  | 51.2578 | 0.00456   |
| 45.06 | 0.03521 | 51.2775 | 0.04901   |
| 45.08 | 0.03462 | 51.2971 | 0.06223   |
| 45.1  | 0.03852 | 51.3168 | 0.05525   |
| 45.12 | 0.02597 | 51.3365 | 0.08958   |
| 45.14 | 0.03078 | 51.3561 | 0.01049   |
| 45.16 | 0.05356 | 51.3758 | 0.03691   |
| 45.18 | 0.02604 | 51.3954 | 0.01849   |
| 45.2  | 0.02846 | 51.4151 | -8.09E-04 |
| 45.22 | 0.0204  | 51.4347 | 0.03836   |
| 45.24 | 0.01982 | 51.4544 | 0.07929   |
| 45.26 | 0.06326 | 51.474  | 6.36E-04  |
| 45.28 | 0.04382 | 51.5133 | 0.07897   |
| 45.3  | 0.02558 | 51.533  | 0.06627   |
| 45.32 | 0.0256  | 51.5526 | 0.04784   |
| 45.34 | 0.03162 | 51.5723 | 0.08174   |
| 45.36 | 0.05469 | 51.5919 | 0.0554    |
| 45.38 | 0.0616  | 51.6116 | 0.1016    |
| 45.4  | 0.03797 | 51.6313 | 0.06823   |
| 45.42 | 0.04937 | 51.6509 | 0.05553   |
| 45.44 | 0.04311 | 51.6706 | 0.01996   |
| 45.46 | 0.03595 | 51.6902 | 0.09122   |
| 45.48 | 0.05214 | 51.7099 | 0.05961   |
| 45.5  | 0.05276 | 51.7295 | 0.11328   |
| 45.52 | 0.03213 | 51.7492 | 0.08167   |
| 45.54 | 0.03963 | 51.7688 | 0.07072   |
| 45.56 | 0.04624 | 51.7885 | 0.00921   |
| 45.58 | 0.05106 | 51.8081 | 0.0286    |
| 45.6  | 0.04958 | 51.8278 | 0.06293   |
| 45.62 | 0.06997 | 51.8474 | 0.05286   |
| 45.64 | 0.05771 | 51.8671 | 0.0696    |
| 45.66 | 0.05684 | 51.8868 | 0.04942   |
| 45.68 | 0.06045 | 51.9064 | 0.06001   |
| 45.7  | 0.05988 | 51.9261 | 0.04159   |
| 45.72 | 0.08206 | 51.9457 | 0.10757   |
| 45.74 | 0.09046 | 51.9654 | 0.03772   |
| 45.76 | 0.10186 | 51.985  | 0.04787   |
| 45.78 | 0.07105 | 52.0047 | 0.08      |
| 45.8  | 0.09143 | 52.0243 | 0.10202   |
| 45.82 | 0.09774 | 52.044  | 0.00755   |
| 45.84 | 0.10705 | 52.0636 | 0.08892   |
| 45.86 | 0.09689 | 52.0833 | 0.05906   |
| 45.88 | 0.07955 | 52.1226 | 0.07365   |
| 45.9  | 0.09604 | 52.1423 | 0.07237   |
| 45.92 | 0.11013 | 52.1619 | 0.06978   |

|       |         |         |         |
|-------|---------|---------|---------|
| 45.94 | 0.11345 | 52.1816 | 0.0496  |
| 45.96 | 0.11707 | 52.2012 | 0.01579 |
| 45.98 | 0.10302 | 52.2209 | 0.03869 |
| 46    | 0.11711 | 52.2405 | 0.05719 |
| 46.02 | 0.12342 | 52.2602 | 0.05987 |
| 46.04 | 0.13512 | 52.2798 | 0.10563 |
| 46.06 | 0.13066 | 52.2995 | 0.06567 |
| 46.08 | 0.13996 | 52.3191 | 0.03581 |
| 46.1  | 0.12591 | 52.3388 | 0.06135 |
| 46.12 | 0.15408 | 52.3584 | 0.07063 |
| 46.14 | 0.16518 | 52.3781 | 0.0311  |
| 46.16 | 0.13826 | 52.3978 | 0.06807 |
| 46.18 | 0.16044 | 52.4174 | 0.09405 |
| 46.2  | 0.15118 | 52.4371 | 0.0809  |
| 46.22 | 0.17306 | 52.4567 | 0.04885 |
| 46.24 | 0.17757 | 52.4764 | 0.0146  |
| 46.26 | 0.17071 | 52.496  | 0.04673 |
| 46.28 | 0.16834 | 52.5353 | 0.09209 |
| 46.3  | 0.17225 | 52.555  | 0.02707 |
| 46.32 | 0.18425 | 52.5943 | 0.00957 |
| 46.34 | 0.18757 | 52.6139 | 0.01752 |
| 46.36 | 0.18849 | 52.6336 | 0.07603 |
| 46.38 | 0.16786 | 52.6532 | 0.08882 |
| 46.4  | 0.17776 | 52.6729 | 0.10557 |
| 46.42 | 0.17659 | 52.6926 | 0.06165 |
| 46.44 | 0.18799 | 52.7319 | 0.05865 |
| 46.46 | 0.20897 | 52.7515 | 0.00726 |
| 46.48 | 0.17546 | 52.7712 | 0.0051  |
| 46.5  | 0.19045 | 52.7908 | 0.02097 |
| 46.52 | 0.20005 | 52.8105 | 0.0575  |
| 46.54 | 0.18601 | 52.8301 | 0.05886 |
| 46.56 | 0.18783 | 52.8498 | -0.0066 |
| 46.58 | 0.17617 | 52.8694 | 0.0097  |
| 46.6  | 0.18159 | 52.8891 | 0.0537  |
| 46.62 | 0.1846  | 52.9087 | 0.06254 |
| 46.64 | 0.19211 | 52.9284 | 0.07665 |
| 46.66 | 0.16968 | 52.9481 | 0.04635 |
| 46.68 | 0.13797 | 52.9677 | 0.08112 |
| 46.7  | 0.17062 | 52.9874 | 0.05523 |
| 46.72 | 0.17244 | 53.007  | 0.06538 |
| 46.74 | 0.14672 | 53.0267 | 0.01179 |
| 46.76 | 0.12878 | 53.0463 | 0.04656 |
| 46.78 | 0.11982 | 53.066  | 0.01978 |
| 46.8  | 0.13182 | 53.0856 | 0.01455 |
| 46.82 | 0.13723 | 53.1053 | 0.01767 |
| 46.84 | 0.13845 | 53.1249 | 0.00848 |
| 46.86 | 0.13848 | 53.1446 | 0.01423 |

|       |         |         |          |
|-------|---------|---------|----------|
| 46.88 | 0.11365 | 53.1642 | 0.00328  |
| 46.9  | 0.11906 | 53.1839 | 0.04597  |
| 46.92 | 0.10052 | 53.2036 | -0.00587 |
| 46.94 | 0.09636 | 53.2232 | 0.00428  |
| 46.96 | 0.09428 | 53.2429 | 0.02543  |
| 46.98 | 0.08922 | 53.2625 | 0.01272  |
| 47    | 0.08774 | 53.2822 | 0.01232  |
| 47.02 | 0.09495 | 53.3018 | 0.02863  |
| 47.04 | 0.0824  | 53.3215 | 0.04493  |
| 47.06 | 0.08991 | 53.3411 | 0.07223  |
| 47.08 | 0.07856 | 53.3608 | 0.02479  |
| 47.1  | 0.07349 | 53.4001 | 0.04905  |
| 47.12 | 0.06273 | 53.4197 | 0.03415  |
| 47.14 | 0.05168 | 53.4394 | 0.04342  |
| 47.16 | 0.04841 | 53.4591 | 0.0228   |
| 47.18 | 0.07298 | 53.4787 | 0.02768  |
| 47.2  | 0.06373 | 53.4984 | 0.09146  |
| 47.22 | 0.06585 | 53.518  | 0.02248  |
| 47.24 | 0.0509  | 53.5377 | 0.00362  |
| 47.26 | 0.04164 | 53.5573 | 0.02784  |
| 47.28 | 0.05125 | 53.577  | 0.08942  |
| 47.3  | 0.036   | 53.6163 | 0.00554  |
| 47.32 | 0.02974 | 53.6359 | 0.01262  |
| 47.34 | 0.01389 | 53.6556 | 0.05794  |
| 47.36 | 0.05643 | 53.6949 | 0.05362  |
| 47.38 | 0.05076 | 53.7145 | 0.04091  |
| 47.4  | 0.03791 | 53.7342 | 0.06381  |
| 47.42 | 0.03285 | 53.7539 | 0.03528  |
| 47.44 | 0.04125 | 53.7735 | 0.02125  |
| 47.46 | 0.04337 | 53.7932 | -0.01255 |
| 47.48 | 0.03202 | 53.8128 | -0.01251 |
| 47.5  | 0.0548  | 53.8325 | 0.09259  |
| 47.52 | 0.03296 | 53.8521 | 0.09263  |
| 47.54 | 0.03418 | 53.8718 | 0.04124  |
| 47.56 | 0.04708 | 53.8914 | 0.02282  |
| 47.58 | 0.03363 | 53.9111 | -0.01099 |
| 47.6  | 0.02437 | 53.9307 | 0.10027  |
| 47.62 | 0.02649 | 53.9504 | 0.07481  |
| 47.64 | 0.03849 | 53.97   | -0.00735 |
| 47.66 | 0.03193 | 53.9897 | 0.00852  |
| 47.68 | 0.02147 | 54.0094 | 0.10527  |
| 47.7  | 0.03587 | 54.029  | 0.08333  |
| 47.72 | 0.02631 | 54.0487 | 0.05656  |
| 47.74 | 0.03621 | 54.088  | 0.01268  |
| 47.76 | 0.03055 | 54.1076 | 0.07514  |
| 47.78 | 0.0165  | 54.1469 | -0.01358 |
| 47.8  | 0.0279  | 54.1666 | 0.0401   |

|       |         |         |           |
|-------|---------|---------|-----------|
| 47.82 | 0.0408  | 54.1862 | 0.03266   |
| 47.84 | 0.03453 | 54.2059 | 0.04545   |
| 47.86 | 0.02528 | 54.2255 | 0.04813   |
| 47.88 | 0.0274  | 54.2649 | 0.07811   |
| 47.9  | 0.01874 | 54.2845 | 0.0232    |
| 47.92 | 0.02804 | 54.3042 | 0.01049   |
| 47.94 | 0.02387 | 54.3238 | 0.03866   |
| 47.96 | 0.03946 | 54.3435 | -0.00657  |
| 47.98 | 0.02871 | 54.3631 | -0.01708  |
| 48    | 0.03382 | 54.3828 | 0.04714   |
| 48.02 | 0.03534 | 54.4024 | 0.03619   |
| 48.04 | 0.04495 | 54.4221 | -0.01037  |
| 48.06 | 0.03958 | 54.4417 | -0.00769  |
| 48.08 | 0.01565 | 54.4614 | 0.04291   |
| 48.1  | 0.02256 | 54.481  | 0.01218   |
| 48.12 | 0.02827 | 54.5007 | 0.01573   |
| 48.14 | 0.00644 | 54.5204 | 0.04083   |
| 48.16 | 0.02203 | 54.54   | 0.04615   |
| 48.18 | 0.01457 | 54.5597 | 0.07828   |
| 48.2  | 0.03226 | 54.5793 | 0.03656   |
| 48.22 | 0.02659 | 54.599  | 0.00275   |
| 48.24 | 0.02332 | 54.6186 | 0.04983   |
| 48.26 | 0.01916 | 54.6383 | 0.08064   |
| 48.28 | 0.03445 | 54.6579 | 0.01342   |
| 48.3  | 0.02429 | 54.6776 | 0.05259   |
| 48.32 | 0.02462 | 54.6972 | 0.04735   |
| 48.34 | 0.03182 | 54.7169 | 0.09136   |
| 48.36 | 0.02197 | 54.7365 | 0.06634   |
| 48.38 | 0.02858 | 54.7562 | 0.01363   |
| 48.4  | 0.01363 | 54.7758 | 0.04796   |
| 48.42 | 0.01545 | 54.7955 | 0.06207   |
| 48.44 | 0.01158 | 54.8152 | 0.01243   |
| 48.46 | 0.01939 | 54.8348 | 0.06171   |
| 48.48 | 0.01642 | 54.8545 | -0.00595  |
| 48.5  | 0.01644 | 54.8741 | 0.0319    |
| 48.52 | 0.02575 | 54.8938 | -1.55E-04 |
| 48.54 | 0.02577 | 54.9331 | 0.02279   |
| 48.56 | 0.04046 | 54.9527 | 0.03689   |
| 48.58 | 0.01234 | 54.9724 | 0.05716   |
| 48.6  | 0.02255 | 54.992  | 0.03434   |
| 48.62 | 0.03544 | 55.0117 | -3.49E-04 |
| 48.64 | 0.03277 | 55.0313 | 0.00892   |
| 48.66 | 0.0301  | 55.051  | 0.01951   |
| 48.68 | 0.03162 | 55.0707 | 0.07934   |
| 48.7  | 0.01757 | 55.0903 | 0.05784   |
| 48.72 | 0.02838 | 55.11   | 0.05129   |
| 48.74 | 0.0269  | 55.1296 | 0.01616   |

|       |         |         |          |
|-------|---------|---------|----------|
| 48.76 | 0.02513 | 55.1493 | 0.01532  |
| 48.78 | 0.03563 | 55.1689 | 0.01492  |
| 48.8  | 0.02607 | 55.1886 | 0.02288  |
| 48.82 | 0.00304 | 55.2082 | 0.04578  |
| 48.84 | 0.03091 | 55.2279 | -0.0043  |
| 48.86 | 0.03752 | 55.2868 | 0.07496  |
| 48.88 | 0.03725 | 55.3065 | 0.00202  |
| 48.9  | 0.03877 | 55.3262 | 0.0302   |
| 48.92 | 0.02083 | 55.3458 | 0.05266  |
| 48.94 | 0.02744 | 55.3655 | 0.02896  |
| 48.96 | 0.03794 | 55.3851 | 0.04527  |
| 48.98 | 0.02778 | 55.4048 | 0.04179  |
| 49    | 0.04188 | 55.4244 | 0.06249  |
| 49.02 | 0.03771 | 55.4441 | 0.06122  |
| 49.04 | 0.03893 | 55.4637 | 0.01422  |
| 49.06 | 0.02847 | 55.4834 | 0.07273  |
| 49.08 | 0.03179 | 55.503  | 0.03232  |
| 49.1  | 0.02433 | 55.5227 | 0.00203  |
| 49.12 | 0.01567 | 55.5423 | 0.04515  |
| 49.14 | 0.02078 | 55.562  | 0.07641  |
| 49.16 | 0.04057 | 55.6013 | 0.06726  |
| 49.18 | 0.02801 | 55.621  | 0.07609  |
| 49.2  | 0.01487 | 55.6603 | 0.01507  |
| 49.22 | 0.03255 | 55.6799 | 0.00675  |
| 49.24 | 0.03826 | 55.6996 | -0.00727 |
| 49.26 | 0.04637 | 55.7192 | 0.06443  |
| 49.28 | 0.01316 | 55.7389 | 0.08073  |
| 49.3  | 0.03414 | 55.7585 | 0.04692  |
| 49.32 | 0.02908 | 55.7782 | 0.03202  |
| 49.34 | 0.027   | 55.8175 | 0.01935  |
| 49.36 | 0.02284 | 55.8371 | -0.01446 |
| 49.38 | 0.01867 | 55.8568 | 0.02031  |
| 49.4  | 0.01989 | 55.8765 | 0.02958  |
| 49.42 | 0.03099 | 55.8961 | 0.04941  |
| 49.44 | 0.04029 | 55.9158 | 0.00417  |
| 49.46 | 0.03104 | 55.9354 | 0.03938  |
| 49.48 | 0.03495 | 55.9551 | -0.01377 |
| 49.5  | 0.0218  | 55.9747 | -0.00406 |
| 49.52 | 0.01913 | 55.9944 | 0.0162   |
| 49.54 | 0.04251 | 56.014  | -0.00222 |
| 49.56 | 0.02487 | 56.0533 | 0.01852  |
| 49.58 | 0.03477 | 56.073  | 0.01549  |
| 49.6  | 0.03898 | 56.0926 | 0.04278  |
| 49.62 | 0.05218 | 56.1123 | 0.10437  |
| 49.64 | 0.01747 | 56.132  | 0.03055  |
| 49.66 | 0.03726 | 56.1516 | 0.09302  |
| 49.68 | 0.03429 | 56.1713 | 0.00646  |

|       |         |         |          |
|-------|---------|---------|----------|
| 49.7  | 0.02623 | 56.1909 | 0.00386  |
| 49.72 | 0.03074 | 56.2106 | 0.04127  |
| 49.74 | 0.03555 | 56.2302 | 0.06153  |
| 49.76 | 0.02899 | 56.2499 | 0.05893  |
| 49.78 | 0.03081 | 56.2695 | 0.07744  |
| 49.8  | 0.01317 | 56.2892 | 0.03176  |
| 49.82 | 0.03744 | 56.3088 | 0.03224  |
| 49.84 | 0.02819 | 56.3285 | 0.01778  |
| 49.86 | 0.0351  | 56.3481 | 0.04463  |
| 49.88 | 0.02524 | 56.3678 | 0.0794   |
| 49.9  | 0.04891 | 56.3875 | 0.02977  |
| 49.92 | 0.04475 | 56.4071 | 0.01134  |
| 49.94 | 0.03908 | 56.4268 | 0.01974  |
| 49.96 | 0.02893 | 56.4464 | 0.00483  |
| 49.98 | 0.0514  | 56.4661 | 0.06906  |
| 50    | 0.04364 | 56.4857 | 0.0625   |
| 50.02 | 0.04217 | 56.5054 | 0.05243  |
| 50.04 | 0.0383  | 56.525  | 0.07533  |
| 50.06 | 0.03593 | 56.5447 | 0.02218  |
| 50.08 | 0.03296 | 56.5643 | 0.01123  |
| 50.1  | 0.01502 | 56.584  | -0.00411 |
| 50.12 | 0.01265 | 56.6036 | 0.08693  |
| 50.14 | 0.03782 | 56.6233 | 0.09224  |
| 50.16 | 0.03425 | 56.643  | 0.05931  |
| 50.18 | 0.04774 | 56.6626 | 0.01715  |
| 50.2  | 0.02831 | 56.6823 | 0.01411  |
| 50.22 | 0.0283  | 56.7019 | -0.01222 |
| 50.24 | 0.00705 | 56.7216 | 0.07486  |
| 50.26 | 0.03491 | 56.7412 | 0.02259  |
| 50.28 | 0.01096 | 56.7609 | 0.08681  |
| 50.3  | 0.01936 | 56.7805 | 0.06268  |
| 50.32 | 0.01547 | 56.8002 | 0.04249  |
| 50.34 | 0.0086  | 56.8198 | 0.0333   |
| 50.36 | 0.03525 | 56.8395 | 0.11379  |
| 50.38 | 0.01281 | 56.8591 | 0.07647  |
| 50.4  | 0.01222 | 56.8788 | 0.04969  |
| 50.42 | 0.03348 | 56.8984 | 0.02819  |
| 50.44 | 0.02241 | 56.9181 | 0.07571  |
| 50.46 | 0.01643 | 56.9378 | 0.03795  |
| 50.48 | 0.02273 | 56.9574 | 0.05513  |
| 50.5  | 0.01406 | 56.9771 | 0.03803  |
| 50.52 | 0.01436 | 56.9967 | 0.04202  |
| 50.54 | 0.02545 | 57.0164 | 0.05833  |
| 50.56 | 0.01827 | 57.036  | 0.06057  |
| 50.58 | 0.02697 | 57.0557 | 0.11073  |
| 50.6  | 0.03326 | 57.0753 | 0.10153  |
| 50.62 | 0.02908 | 57.095  | 0.08839  |



|       |           |         |          |
|-------|-----------|---------|----------|
| 50.64 | 0.0222    | 57.1146 | 0.1003   |
| 50.66 | 0.02161   | 57.1343 | 0.06121  |
| 50.68 | 0.02761   | 57.1539 | 0.00542  |
| 50.7  | 0.04918   | 57.1736 | 0.10482  |
| 50.72 | 0.03212   | 57.1933 | 0.08068  |
| 50.74 | 0.00788   | 57.2129 | 0.00159  |
| 50.76 | 0.03094   | 57.2326 | 0.02669  |
| 50.78 | 0.02257   | 57.2522 | 0.03904  |
| 50.8  | 0.01988   | 57.2719 | 0.06677  |
| 50.82 | 0.01091   | 57.2915 | 0.06506  |
| 50.84 | 0.01511   | 57.3112 | 0.02465  |
| 50.86 | -0.00943  | 57.3308 | 0.03437  |
| 50.88 | -0.00374  | 57.3505 | 0.0643   |
| 50.9  | 0.02352   | 57.3701 | 0.02126  |
| 50.92 | 0.0364    | 57.3898 | 0.03317  |
| 50.94 | 0.02473   | 57.4094 | 0.07365  |
| 50.96 | 0.02504   | 57.4291 | 0.07589  |
| 50.98 | 0.02146   | 57.4488 | 0.10803  |
| 51    | 0.01488   | 57.4684 | 0.05487  |
| 51.02 | 0.02267   | 57.4881 | 0.06415  |
| 51.04 | 0.01969   | 57.5077 | 0.0022   |
| 51.06 | 0.02329   | 57.5274 | 0.09148  |
| 51.08 | 0.01102   | 57.547  | -0.00958 |
| 51.1  | 0.01582   | 57.5667 | 0.052    |
| 51.12 | 0.01314   | 57.5863 | 0.04193  |
| 51.14 | 0.01883   | 57.606  | 0.07582  |
| 51.16 | 0.01735   | 57.6256 | 0.02839  |
| 51.18 | 0.03023   | 57.6453 | 0.02139  |
| 51.2  | -4.25E-17 | 57.6649 | 0.03023  |
| 51.22 | 0.01977   | 57.6846 | 0.04433  |
| 51.24 | 0.01948   | 57.7043 | 0.00921  |
| 51.26 | 0.0153    | 57.7239 | 0.04617  |
| 51.28 | 0.00962   | 57.7436 | 0.02379  |
| 51.3  | 0.01352   | 57.7632 | 0.01724  |
| 51.32 | 0.00754   | 57.7829 | -0.00162 |
| 51.34 | 0.03389   | 57.8025 | 0.03667  |
| 51.36 | 0.03091   | 57.8222 | 0.07144  |
| 51.38 | 0.01445   | 57.8418 | 0.0196   |
| 51.4  | 0.02374   | 57.8615 | 0.06229  |
| 51.42 | 0.03303   | 57.8811 | 0.02056  |
| 51.44 | 0.02586   | 57.9008 | 0.09314  |
| 51.46 | 0.02437   | 57.9204 | 0.02592  |
| 51.48 | 0.01899   | 57.9401 | 0.01805  |
| 51.5  | 0.0184    | 57.9597 | 0.10645  |
| 51.52 | 0.03008   | 57.9794 | 0.04627  |
| 51.54 | 0.01812   | 57.9991 | 0.06653  |
| 51.56 | 0.00974   | 58.0187 | 0.02832  |

|       |          |         |          |
|-------|----------|---------|----------|
| 51.58 | 0.01963  | 58.0384 | 0.07452  |
| 51.6  | 0.02563  | 58.058  | 0.05742  |
| 51.62 | 0.01216  | 58.0777 | 0.05482  |
| 51.64 | 0.02265  | 58.0973 | 0.01706  |
| 51.66 | 0.01967  | 58.1366 | 0.0611   |
| 51.68 | 0.02626  | 58.1563 | 0.05015  |
| 51.7  | 0.03406  | 58.1759 | 0.05986  |
| 51.72 | 0.00862  | 58.1956 | -0.00648 |
| 51.74 | 0.01821  | 58.2152 | 0.04456  |
| 51.76 | 0.0251   | 58.2349 | 0.01119  |
| 51.78 | 0.02212  | 58.2546 | 0.0719   |
| 51.8  | 0.00626  | 58.2742 | 0.0227   |
| 51.82 | 0.01465  | 58.2939 | 0.06978  |
| 51.84 | 0.01705  | 58.3135 | 0.03597  |
| 51.86 | 0.01227  | 58.3332 | 0.02019  |
| 51.88 | 0.02845  | 58.3528 | 0.06595  |
| 51.9  | -0.00807 | 58.3725 | 0.04445  |
| 51.92 | 0.02068  | 58.3921 | 0.07965  |
| 51.94 | 0.02129  | 58.4118 | 0.00101  |
| 51.96 | 0.01651  | 58.4314 | 0.06303  |
| 51.98 | 0.03239  | 58.4511 | 0.08066  |
| 52    | 0.01683  | 58.4707 | 0.07674  |
| 52.02 | 0.01115  | 58.4904 | 0.06711  |
| 52.04 | 0.02163  | 58.5101 | 0.02055  |
| 52.06 | 0.02374  | 58.5297 | 0.03906  |
| 52.08 | 0.02255  | 58.5494 | 0.10152  |
| 52.1  | 0.02555  | 58.569  | 0.01408  |
| 52.12 | 0.01179  | 58.5887 | 0.07347  |
| 52.14 | 0.01689  | 58.6083 | 9.75E-04 |
| 52.16 | 0.02259  | 58.628  | 0.01816  |
| 52.18 | 0.03038  | 58.6476 | 0.07139  |
| 52.2  | 0.01781  | 58.6673 | 0.05033  |
| 52.22 | -0.00343 | 58.6869 | 0.05741  |
| 52.24 | 0.01903  | 58.7066 | -0.00937 |
| 52.26 | 0.01095  | 58.7262 | 0.08255  |
| 52.28 | 0.00557  | 58.7459 | 0.08567  |
| 52.3  | 0.02055  | 58.7656 | 0.08087  |
| 52.32 | 0.01218  | 58.7852 | 0.04618  |
| 52.34 | 0.02506  | 58.8049 | 0.05721  |
| 52.36 | 0.01759  | 58.8245 | 0.06473  |
| 52.38 | 0.01071  | 58.8442 | 0.05202  |
| 52.4  | 0.01581  | 58.8638 | 0.03404  |
| 52.42 | 0.00803  | 58.8835 | 6.68E-04 |
| 52.44 | 0.02002  | 58.9031 | 0.03544  |
| 52.46 | 0.02212  | 58.9228 | 0.06186  |
| 52.48 | 0.00836  | 58.9424 | 0.0298   |
| 52.5  | 0.01795  | 58.9817 | 0.05319  |

|       |          |         |          |
|-------|----------|---------|----------|
| 52.52 | 5.93E-04 | 59.0014 | 0.06729  |
| 52.54 | 0.02815  | 59.021  | 0.05019  |
| 52.56 | -0.00418 | 59.0407 | 0.01111  |
| 52.58 | 0.0093   | 59.0604 | 0.04588  |
| 52.6  | 0.00781  | 59.08   | 0.09559  |
| 52.62 | 0.0195   | 59.0997 | 0.07453  |
| 52.64 | 0.00753  | 59.1193 | 0.04995  |
| 52.66 | 0.00634  | 59.139  | 0.00208  |
| 52.68 | 0.02851  | 59.1586 | 0.0729   |
| 52.7  | 0.00936  | 59.1783 | 0.07382  |
| 52.72 | 0.02164  | 59.1979 | 0.04089  |
| 52.74 | 0.02075  | 59.2176 | 0.10335  |
| 52.76 | 0.01747  | 59.2372 | 0.05811  |
| 52.78 | 0.02346  | 59.2765 | 0.0771   |
| 52.8  | 0.02407  | 59.2962 | 0.07846  |
| 52.82 | 0.00522  | 59.3159 | 0.04377  |
| 52.84 | 0.02199  | 59.3552 | 0.08649  |
| 52.86 | 0.0211   | 59.3748 | 0.02499  |
| 52.88 | 0.02351  | 59.3945 | 0.00657  |
| 52.9  | 0.01873  | 59.4141 | 0.0853   |
| 52.92 | 0.01514  | 59.4338 | 0.05413  |
| 52.94 | 0.02443  | 59.4534 | 0.06032  |
| 52.96 | 0.03133  | 59.4731 | 0.02783  |
| 52.98 | 0.01188  | 59.4927 | 0.05864  |
| 53    | 0.00829  | 59.5124 | 0.03539  |
| 53.02 | 0.01249  | 59.532  | 0.10005  |
| 53.04 | 0.0152   | 59.5517 | 0.0847   |
| 53.06 | 0.01551  | 59.5714 | 0.05133  |
| 53.08 | 0.0224   | 59.591  | 0.08654  |
| 53.1  | 0.01852  | 59.6107 | 0.0523   |
| 53.12 | 0.03529  | 59.6303 | 0.01541  |
| 53.14 | 0.01943  | 59.65   | 0.00358  |
| 53.16 | 0.01316  | 59.6696 | 0.03571  |
| 53.18 | 0.03771  | 59.6893 | 0.08323  |
| 53.2  | 0.02245  | 59.7089 | 0.06393  |
| 53.22 | 0.0057   | 59.7286 | 0.03803  |
| 53.24 | 0.0072   | 59.7482 | 0.06665  |
| 53.26 | 0.02577  | 59.7875 | 0.04915  |
| 53.28 | 0.00992  | 59.8072 | -0.01631 |
| 53.3  | 0.01442  | 59.8269 | 0.01362  |
| 53.32 | 0.01203  | 59.8465 | 0.07521  |
| 53.34 | 0.00665  | 59.8662 | 0.01326  |
| 53.36 | 0.01534  | 59.8858 | 0.08804  |
| 53.38 | 0.00697  | 59.9055 | 0.08544  |
| 53.4  | 0.00608  | 59.9251 | 0.01031  |
| 53.42 | 0.00549  | 59.9448 | 0.01386  |
| 53.44 | 0.03693  | 59.9644 | 0.08117  |

|       |         |         |          |
|-------|---------|---------|----------|
| 53.46 | 0.02407 | 59.9841 | 0.05571  |
| 53.48 | 0.0106  | 60.0037 | 0.05531  |
| 53.5  | 0.0172  | 60.0234 | 0.06458  |
| 53.52 | 0.02499 | 60.043  | -0.00176 |
| 53.54 | 0.02111 | 60.0823 | 0.06119  |
| 53.56 | 0.01633 | 60.102  | 0.05508  |
| 53.58 | 0.01065 | 60.1217 | 0.09424  |
| 53.6  | 0.00347 | 60.1413 | 0.06703  |
| 53.62 | 0.00857 | 60.161  | 0.08597  |
| 53.64 | 0.02684 | 60.1806 | 0.0803   |
| 53.66 | 0.02176 | 60.2003 | 0.03506  |
| 53.68 | 0.01698 | 60.2396 | 0.06635  |
| 53.7  | 0.02028 | 60.2592 | 0.02287  |
| 53.72 | 0.0155  | 60.2789 | 0.02599  |
| 53.74 | 0.02479 | 60.2985 | 0.06252  |
| 53.76 | 0.01193 | 60.3182 | 0.05948  |
| 53.78 | 0.02751 | 60.3378 | 0.05249  |
| 53.8  | 0.00207 | 60.3575 | 0.07715  |
| 53.82 | 0.02094 | 60.3772 | 0.08554  |
| 53.84 | 0.01107 | 60.3968 | 0.00997  |
| 53.86 | 0.00419 | 60.4165 | 0.02672  |
| 53.88 | 0.0018  | 60.4361 | 8.19E-04 |
| 53.9  | 0.006   | 60.4558 | 0.00877  |
| 53.92 | 0.02907 | 60.4754 | 0.03915  |
| 53.94 | 0.01351 | 60.4951 | 0.02512  |
| 53.96 | 0.01322 | 60.5147 | 0.00714  |
| 53.98 | 0.00275 | 60.5344 | -0.00205 |
| 54    | 0.02042 | 60.554  | 0.05689  |
| 54.02 | 0.02941 | 60.5737 | 0.02748  |
| 54.04 | 0.00816 | 60.5933 | 0.0517   |
| 54.06 | 0.03452 | 60.613  | 0.07196  |
| 54.08 | 0.01566 | 60.6327 | 0.06277  |
| 54.1  | 0.03094 | 60.6523 | 0.02721  |
| 54.12 | 0.01089 | 60.672  | 0.00527  |
| 54.14 | 0.04144 | 60.6916 | -0.0136  |
| 54.16 | 0.02199 | 60.7113 | 0.04008  |
| 54.18 | 0.00733 | 60.7309 | 0.04012  |
| 54.2  | 0.00793 | 60.7506 | 0.0806   |
| 54.22 | 0.00255 | 60.7702 | 0.08548  |
| 54.24 | 0.00765 | 60.7899 | 0.07629  |
| 54.26 | 0.00527 | 60.8095 | 0.08688  |
| 54.28 | 0.01785 | 60.8292 | 0.02494  |
| 54.3  | -0.0025 | 60.8685 | 0.07645  |
| 54.32 | 0.03284 | 60.8881 | 0.08792  |
| 54.34 | 0.01698 | 60.9078 | 0.08225  |
| 54.36 | 0.02807 | 60.9275 | 0.04668  |
| 54.38 | 0.03167 | 60.9471 | 0.08453  |

|       |          |         |           |
|-------|----------|---------|-----------|
| 54.4  | 0.00323  | 60.9668 | 0.05995   |
| 54.42 | 5.48E-04 | 60.9864 | 0.07889   |
| 54.44 | 0.00744  | 61.0061 | 0.08157   |
| 54.46 | 0.02781  | 61.0257 | 0.00776   |
| 54.48 | 0.01016  | 61.0454 | 0.06935   |
| 54.5  | 0.00507  | 61.065  | 0.06851   |
| 54.52 | 0.01916  | 61.0847 | 0.09141   |
| 54.54 | 0.01318  | 61.1043 | 0.03782   |
| 54.56 | 0.0039   | 61.124  | 0.04973   |
| 54.58 | 0.01649  | 61.1436 | 0.07702   |
| 54.6  | 0.00362  | 61.1633 | 0.07838   |
| 54.62 | 0.01261  | 61.2419 | 0.06096   |
| 54.64 | 0.00963  | 61.2616 | 0.0443    |
| 54.66 | 0.01533  | 61.2812 | 0.10237   |
| 54.68 | 0.02402  | 61.3009 | 0.04394   |
| 54.7  | 0.00906  | 61.3205 | 0.03211   |
| 54.72 | 0.02613  | 61.3402 | 0.03083   |
| 54.74 | 0.01057  | 61.3598 | 0.02648   |
| 54.76 | 0.02016  | 61.3795 | -2.97E-04 |
| 54.78 | 0.01029  | 61.3991 | 0.0059    |
| 54.8  | 0.02976  | 61.4188 | 0.00198   |
| 54.82 | 0.0139   | 61.4385 | 0.04291   |
| 54.84 | 0.01481  | 61.4581 | 0.07504   |
| 54.86 | 0.0214   | 61.4778 | 0.06145   |
| 54.88 | 0.01423  | 61.4974 | 0.06501   |
| 54.9  | 0.00855  | 61.5171 | 0.05274   |
| 54.92 | 0.01694  | 61.5367 | -0.00393  |
| 54.94 | 0.02024  | 61.5564 | 0.07173   |
| 54.96 | 0.00468  | 61.576  | 0.03308   |
| 54.98 | 0.00888  | 61.5957 | 0.02785   |
| 55    | 0.0047   | 61.6153 | 1.94E-04  |
| 55.02 | 0.02207  | 61.635  | -0.02526  |
| 55.04 | 0.01669  | 61.6546 | 0.07281   |
| 55.06 | 0.0158   | 61.6743 | 0.0623    |
| 55.08 | 0.00534  | 61.694  | 0.01838   |
| 55.1  | 0.01373  | 61.7136 | 0.02326   |
| 55.12 | -0.00483 | 61.7333 | 0.01846   |
| 55.14 | 0.01883  | 61.7529 | 0.03213   |
| 55.16 | 0.00357  | 61.7726 | 0.06382   |
| 55.18 | 0.01346  | 61.7922 | -0.00471  |
| 55.2  | 0.01347  | 61.8119 | 0.01159   |
| 55.22 | 0.01258  | 61.8315 | 0.03405   |
| 55.24 | 0.01469  | 61.8512 | 0.03541   |
| 55.26 | -0.00416 | 61.8708 | -0.01818  |
| 55.28 | 3.59E-05 | 61.8905 | 0.06187   |
| 55.3  | 0.01621  | 61.9101 | 0.05532   |
| 55.32 | 0.01293  | 61.9298 | 0.0536    |

|       |           |         |           |
|-------|-----------|---------|-----------|
| 55.34 | 0.01294   | 61.9494 | -0.01098  |
| 55.36 | 0.01774   | 61.9691 | 0.04181   |
| 55.38 | 0.01325   | 61.9888 | -0.0087   |
| 55.4  | 0.00787   | 62.0084 | 0.10388   |
| 55.42 | 0.01537   | 62.0281 | 0.0582    |
| 55.44 | 0.02705   | 62.0477 | 0.01912   |
| 55.46 | -7.81E-04 | 62.0674 | 0.09389   |
| 55.48 | 0.00731   | 62.1067 | 0.06628   |
| 55.5  | -0.00166  | 62.1263 | 0.03994   |
| 55.52 | 0.01751   | 62.146  | 0.0479    |
| 55.54 | 0.01812   | 62.1656 | 0.05145   |
| 55.56 | 0.01423   | 62.1853 | 0.01764   |
| 55.58 | 0.01993   | 62.2049 | -0.00957  |
| 55.6  | 0.01245   | 62.2246 | 0.02388   |
| 55.62 | 0.03432   | 62.2443 | -0.01476  |
| 55.64 | 0.01068   | 62.2639 | 0.05913   |
| 55.66 | 0.01847   | 62.2836 | 0.0684    |
| 55.68 | -0.00278  | 62.3032 | 0.01965   |
| 55.7  | 0.0143    | 62.3229 | 0.05574   |
| 55.72 | 0.0173    | 62.3425 | 0.00346   |
| 55.74 | 0.01761   | 62.3622 | 0.0589    |
| 55.76 | 0.01552   | 62.4015 | 0.06909   |
| 55.78 | 0.01882   | 62.4211 | 0.02209   |
| 55.8  | 0.01344   | 62.4408 | 0.01949   |
| 55.82 | 0.03142   | 62.4604 | -6.87E-04 |
| 55.84 | 0.00628   | 62.4801 | 0.05738   |
| 55.86 | 0.00569   | 62.4998 | 0.01918   |
| 55.88 | 0.02036   | 62.5194 | 0.08076   |
| 55.9  | 0.0063    | 62.5391 | 0.07729   |
| 55.92 | 0.00272   | 62.5587 | 0.08656   |
| 55.94 | 0.04794   | 62.5784 | 0.0655    |
| 55.96 | 0.00304   | 62.598  | -0.00963  |
| 55.98 | 0.01472   | 62.6177 | 0.03613   |
| 56    | 0.02521   | 62.6373 | 0.10123   |
| 56.02 | 0.01803   | 62.657  | 0.0683    |
| 56.04 | 0.01445   | 62.6766 | 0.0279    |
| 56.06 | 0.01566   | 62.6963 | -0.00108  |
| 56.08 | 0.01327   | 62.7159 | 0.09304   |
| 56.1  | 0.0028    | 62.7356 | 0.06231   |
| 56.12 | 7.13E-04  | 62.7553 | 0.06235   |
| 56.14 | 0.02377   | 62.7749 | 0.0725    |
| 56.16 | 0.01869   | 62.7946 | 0.06903   |
| 56.18 | 0.0217    | 62.8142 | 0.04093   |
| 56.2  | 0.01183   | 62.8339 | 0.10252   |
| 56.22 | 0.01064   | 62.8535 | 0.06431   |
| 56.24 | 0.0343    | 62.8732 | 0.07315   |
| 56.26 | 0.02054   | 62.8928 | 0.09253   |

|       |          |         |          |
|-------|----------|---------|----------|
| 56.28 | 0.01156  | 62.9125 | 0.0429   |
| 56.3  | 0.02624  | 62.9321 | -0.01204 |
| 56.32 | 0.01038  | 62.9518 | 0.04644  |
| 56.34 | 0.03195  | 62.9714 | 0.01041  |
| 56.36 | 0.0086   | 62.9911 | 0.03943  |
| 56.38 | 0.00951  | 63.0107 | 0.0289   |
| 56.4  | 0.0209   | 63.0304 | 0.03946  |
| 56.42 | 0.02809  | 63.0501 | 0.05926  |
| 56.44 | 0.00654  | 63.0894 | 3.74E-04 |
| 56.46 | 8.65E-04 | 63.109  | 0.08875  |
| 56.48 | 0.01644  | 63.1287 | 0.0914   |
| 56.5  | 0.00927  | 63.1483 | 0.00393  |
| 56.52 | 0.01287  | 63.168  | 0.06637  |
| 56.54 | 0.01078  | 63.2073 | 0.03386  |
| 56.56 | 0.04791  | 63.2269 | 0.03959  |
| 56.58 | 0.01798  | 63.2466 | 0.05675  |
| 56.6  | 0.02219  | 63.2662 | 0.03171  |
| 56.62 | 0.00962  | 63.2859 | 0.01018  |
| 56.64 | 0.01023  | 63.3056 | -0.00431 |
| 56.66 | 0.00694  | 63.3252 | 5.33E-04 |
| 56.68 | 0.00695  | 63.3449 | -0.00209 |
| 56.7  | 0.02253  | 63.3645 | 0.01507  |
| 56.72 | 0.00637  | 63.3842 | 0.02783  |
| 56.74 | 0.01057  | 63.4038 | 0.0107   |
| 56.76 | 0.01507  | 63.4235 | 0.03621  |
| 56.78 | 0.02825  | 63.4431 | 0.016    |
| 56.8  | 0.01928  | 63.4628 | 0.04679  |
| 56.82 | 0.00492  | 63.4824 | 0.01075  |
| 56.84 | 0.01301  | 63.5021 | 0.04989  |
| 56.86 | 0.02769  | 63.5217 | 0.05078  |
| 56.88 | 0.01602  | 63.5414 | 0.10047  |
| 56.9  | 0.00735  | 63.5611 | 0.03103  |
| 56.92 | 0.03011  | 63.5807 | 0.01741  |
| 56.94 | 0.01036  | 63.6004 | 0.04864  |
| 56.96 | 7.90E-04 | 63.62   | 0.0359   |
| 56.98 | 0.01457  | 63.6397 | 0.06185  |
| 57    | 0.01129  | 63.6593 | 0.0179   |
| 57.02 | 0.01998  | 63.679  | 0.02715  |
| 57.04 | 0.00562  | 63.6986 | 0.02145  |
| 57.06 | 0.02359  | 63.7183 | 0.05487  |
| 57.08 | 0.02599  | 63.7379 | 0.06104  |
| 57.1  | 0.00834  | 63.7576 | 0.09622  |
| 57.12 | 0.01104  | 63.7772 | 0.02766  |
| 57.14 | 0.01913  | 63.7969 | 0.05668  |
| 57.16 | 0.01106  | 63.8166 | 0.02197  |
| 57.18 | 0.02274  | 63.8362 | 0.02814  |
| 57.2  | 0.01467  | 63.8559 | 0.04486  |

|       |          |         |          |
|-------|----------|---------|----------|
| 57.22 | 0.01558  | 63.8755 | -0.00305 |
| 57.24 | 0.02726  | 63.8952 | 0.07917  |
| 57.26 | 0.00751  | 64      | 0.07456  |
| 57.28 | 0.01141  | 64.0197 | 0.03002  |
| 57.3  | 0.02789  | 64.0393 | 0.07862  |
| 57.32 | 0.0288   | 64.059  | 0.07213  |
| 57.34 | 0.02282  | 64.0983 | 0.09209  |
| 57.36 | 0.02043  | 64.1376 | 0.02345  |
| 57.38 | 0.01355  | 64.1572 | -0.01485 |
| 57.4  | 0.00997  | 64.1769 | 0.01842  |
| 57.42 | 0.01746  | 64.1965 | 0.02385  |
| 57.44 | -0.00798 | 64.2162 | 0.03383  |
| 57.46 | 0.007    | 64.2358 | -0.00219 |
| 57.48 | 0.00192  | 64.2555 | 0.01006  |
| 57.5  | 0.00582  | 64.2752 | 0.06661  |
| 57.52 | 0.04086  | 64.2948 | -0.01428 |
| 57.54 | 0.01392  | 64.3145 | 0.06783  |
| 57.56 | 0.03818  | 64.3341 | 0.01874  |
| 57.58 | 0.02203  | 64.3538 | 0.06905  |
| 57.6  | 0.02533  | 64.3734 | 0.04098  |
| 57.62 | 0.01276  | 64.3931 | 0.07822  |
| 57.64 | 0.01996  | 64.4127 | 0.00471  |
| 57.66 | 0.02925  | 64.4324 | -0.01087 |
| 57.68 | 0.01279  | 64.452  | 0.05647  |
| 57.7  | 0.00232  | 64.4717 | 0.02953  |
| 57.72 | 0.02029  | 64.4913 | 0.031    |
| 57.74 | 0.01252  | 64.511  | 0.02734  |
| 57.76 | 0.02001  | 64.5306 | 0.06175  |
| 57.78 | 0.01433  | 64.5503 | 0.0314   |
| 57.8  | 0.03081  | 64.57   | 0.03854  |
| 57.82 | 0.00866  | 64.5896 | 0.02183  |
| 57.84 | 0.01855  | 64.6093 | 0.07327  |
| 57.86 | 0.03802  | 64.6289 | 0.04917  |
| 57.88 | 0.003    | 64.6486 | 0.0069   |
| 57.9  | 0.02037  | 64.6682 | 0.06572  |
| 57.92 | 0.01799  | 64.6879 | 0.05696  |
| 57.94 | 0.02428  | 64.7075 | 0.0908   |
| 57.96 | 0.02429  | 64.7272 | 0.02864  |
| 57.98 | 0.01352  | 64.7468 | 0.05964  |
| 58    | 0.02431  | 64.7665 | -0.02694 |
| 58.02 | 0.00875  | 64.7861 | 0.01542  |
| 58.04 | 0.01864  | 64.8058 | 0.05039  |
| 58.06 | 0.01027  | 64.8255 | 0.04731  |
| 58.08 | 0.01746  | 64.8451 | 0.00276  |
| 58.1  | 0.02076  | 64.8648 | 0.00195  |
| 58.12 | 0.01808  | 64.9041 | 0.05939  |
| 58.14 | 0.0106   | 64.9237 | 0.04666  |



|       |         |         |          |
|-------|---------|---------|----------|
| 58.16 | 0.02229 | 64.9434 | 0.08333  |
| 58.18 | 0.00673 | 64.963  | 0.0138   |
| 58.2  | 0.01931 | 64.9827 | 0.03002  |
| 58.22 | 0.01034 | 65.0023 | 0.01445  |
| 58.24 | 0.02083 | 65.022  | 0.03976  |
| 58.26 | 0.01934 | 65.0416 | 0.05372  |
| 58.28 | 0.03462 | 65.0613 | 0.06199  |
| 58.3  | 0.02385 | 65.081  | 0.03903  |
| 58.32 | 0.05589 | 65.1006 | 0.05469  |
| 58.34 | 0.01848 | 65.1203 | 0.04479  |
| 58.36 | 0.02956 | 65.1399 | 0.00536  |
| 58.38 | 0.01909 | 65.1596 | 0.02215  |
| 58.4  | 0.0179  | 65.1792 | 0.05372  |
| 58.42 | 0.03258 | 65.1989 | 0.02451  |
| 58.44 | 0.01972 | 65.2185 | 0.00779  |
| 58.46 | 0.02721 | 65.2382 | 0.03311  |
| 58.48 | 0.01704 | 65.2578 | 0.07489  |
| 58.5  | 0.02244 | 65.2971 | 0.08179  |
| 58.52 | 0.02963 | 65.3168 | 0.01793  |
| 58.54 | 0.01108 | 65.3365 | -0.01071 |
| 58.56 | 0.03324 | 65.3758 | 0.05867  |
| 58.58 | 0.02397 | 65.3954 | 0.06751  |
| 58.6  | 0.0168  | 65.4151 | 0.07181  |
| 58.62 | 0.00812 | 65.4347 | 0.07782  |
| 58.64 | 0.03328 | 65.4544 | 0.02873  |
| 58.66 | 0.01862 | 65.474  | 0.07847  |
| 58.68 | 0.01593 | 65.4937 | 0.03619  |
| 58.7  | 0.02792 | 65.5133 | 0.04901  |
| 58.72 | 0.02164 | 65.533  | 0.04479  |
| 58.74 | 0.02734 | 65.5526 | 0.05704  |
| 58.76 | 0.01118 | 65.5723 | 0.06021  |
| 58.78 | 0.01059 | 65.5919 | 0.07246  |
| 58.8  | 0.02437 | 65.6116 | 0.04666  |
| 58.82 | 0.01869 | 65.6313 | 0.0555   |
| 58.84 | 0.00523 | 65.6509 | 0.0706   |
| 58.86 | 0.01841 | 65.6706 | 0.04309  |
| 58.88 | 0.00764 | 65.6902 | 0.02581  |
| 58.9  | 0.00885 | 65.7099 | 0.10905  |
| 58.92 | 0.01035 | 65.7295 | 0.0293   |
| 58.94 | 0.00737 | 65.7492 | 0.09266  |
| 58.96 | 0.01636 | 65.7688 | 0.07481  |
| 58.98 | 0.03044 | 65.7885 | 0.11092  |
| 59    | 0.01009 | 65.8081 | 0.11465  |
| 59.02 | 0.01579 | 65.8278 | 0.07579  |
| 59.04 | 0.0143  | 65.8474 | 0.06078  |
| 59.06 | 0.02718 | 65.8671 | 0.10143  |
| 59.08 | 0.01581 | 65.8868 | 0.08187  |

|       |         |         |          |
|-------|---------|---------|----------|
| 59.1  | 0.01403 | 65.9064 | 0.06743  |
| 59.12 | 0.02362 | 65.9261 | 0.08536  |
| 59.14 | 0.0341  | 65.9457 | 0.1067   |
| 59.16 | 0.02064 | 65.9654 | 0.07068  |
| 59.18 | 0.02993 | 65.985  | 0.08975  |
| 59.2  | 0.02695 | 66.0833 | 0.08171  |
| 59.22 | 0.02995 | 66.1029 | 0.11271  |
| 59.24 | 0.01169 | 66.1226 | 0.10337  |
| 59.26 | 0.02188 | 66.1423 | 0.0293   |
| 59.28 | 0.02369 | 66.1619 | 0.07051  |
| 59.3  | 0.0237  | 66.1816 | 0.06402  |
| 59.32 | 0.0243  | 66.2012 | 0.11092  |
| 59.34 | 0.01473 | 66.2209 | 0.06297  |
| 59.36 | 0.02073 | 66.2405 | 0.07693  |
| 59.38 | 0.02194 | 66.2602 | 0.12098  |
| 59.4  | 0.01865 | 66.2798 | 0.00601  |
| 59.42 | 0.02285 | 66.2995 | 0.0938   |
| 59.44 | 0.02436 | 66.3191 | -0.01151 |
| 59.46 | 0.01149 | 66.3388 | -0.00665 |
| 59.48 | 0.03216 | 66.3584 | 0.10102  |
| 59.5  | 0.02618 | 66.3781 | 0.04853  |
| 59.52 | 0.0193  | 66.3978 | 0.08123  |
| 59.54 | 0.01153 | 66.4174 | 0.07246  |
| 59.56 | 0.00705 | 66.4371 | 0.08812  |
| 59.58 | 0.03011 | 66.4567 | 0.08504  |
| 59.6  | 0.03012 | 66.4764 | 0.07628  |
| 59.62 | 0.02264 | 66.496  | 0.02662  |
| 59.64 | 0.01577 | 66.5353 | 0.01421  |
| 59.66 | 0.00919 | 66.555  | 0.10427  |
| 59.68 | 0.01309 | 66.5746 | 0.07279  |
| 59.7  | 0.02537 | 66.5943 | 0.06062  |
| 59.72 | 0.03077 | 66.6139 | 0.02062  |
| 59.74 | 0.02928 | 66.6532 | 0.0366   |
| 59.76 | 0.01432 | 66.6729 | 0.07157  |
| 59.78 | 0.02182 | 66.6926 | 0.09802  |
| 59.8  | 0.02332 | 66.7122 | 0.108    |
| 59.82 | 0.01675 | 66.7319 | 0.03563  |
| 59.84 | 0.02124 | 66.7515 | 0.10468  |
| 59.86 | 0.03443 | 66.7712 | 0.04593  |
| 59.88 | 0.01977 | 66.7908 | 0.04512  |
| 59.9  | 0.02546 | 66.8105 | 0.05283  |
| 59.92 | 0.01919 | 66.8301 | 0.10598  |
| 59.94 | 0.02848 | 66.8498 | 0.07165  |
| 59.96 | 0.03298 | 66.8694 | 0.02654  |
| 59.98 | 0.01682 | 66.8891 | 0.04333  |
| 60    | 0.01713 | 66.9087 | 0.0482   |
| 60.02 | 0.01234 | 66.9284 | 0.10476  |

|       |         |         |         |
|-------|---------|---------|---------|
| 60.04 | 0.04229 | 66.9481 | 0.03806 |
| 60.06 | 0.01476 | 66.9677 | 0.07644 |
| 60.08 | 0.02345 | 66.9874 | 0.07052 |
| 60.1  | 0.01986 | 67.007  | 0.04983 |
| 60.12 | 0.0079  | 67.0267 | 0.04902 |
| 60.14 | 0.03485 | 67.0463 | 0.07092 |
| 60.16 | 0.0148  | 67.066  | 0.02127 |
| 60.18 | 0.0187  | 67.0856 | 0.07385 |
| 60.2  | 0.0229  | 67.1053 | 0.02816 |
| 60.22 | 0.02201 | 67.1249 | 0.0904  |
| 60.24 | 0.02292 | 67.1446 | 0.07198 |
| 60.26 | 0.02413 | 67.1642 | 0.10695 |
| 60.28 | 0.01845 | 67.1839 | 0.02832 |
| 60.3  | 0.01546 | 67.2036 | 0.09283 |
| 60.32 | 0.01248 | 67.2232 | 0.08236 |
| 60.34 | 0.03105 | 67.2429 | 0.04918 |
| 60.36 | 0.02058 | 67.2625 | 0.05462 |
| 60.38 | 0.01071 | 67.3018 | 0.08821 |
| 60.4  | 0.04694 | 67.3215 | 0.05332 |
| 60.42 | 0.00264 | 67.3411 | 0.03206 |
| 60.44 | 0.01672 | 67.3608 | 0.07044 |
| 60.46 | 0.02961 | 67.3804 | 0.03612 |
| 60.48 | 0.03231 | 67.4001 | 0.02622 |
| 60.5  | 0.01376 | 67.4197 | 0.03506 |
| 60.52 | 0.01257 | 67.4394 | 0.06094 |
| 60.54 | 0.02216 | 67.4591 | 0.09251 |
| 60.56 | 0.01648 | 67.4787 | 0.05648 |
| 60.58 | 0.02427 | 67.4984 | 0.09259 |
| 60.6  | 0.02518 | 67.518  | 0.04577 |
| 60.62 | 0.02728 | 67.5377 | 0.08017 |
| 60.64 | 0.01921 | 67.5573 | 0.06233 |
| 60.66 | 0.03509 | 67.577  | 0.07742 |
| 60.68 | 0.02102 | 67.5966 | 0.06241 |
| 60.7  | 0.02403 | 67.6163 | 0.065   |
| 60.72 | 0.01236 | 67.6359 | 0.09713 |
| 60.74 | 0.03333 | 67.6556 | 0.1179  |
| 60.76 | 0.03124 | 67.6752 | 0.05348 |
| 60.78 | 0.02137 | 67.6949 | 0.07936 |
| 60.8  | 0.01689 | 67.7145 | 0.04845 |
| 60.82 | 0.016   | 67.7342 | 0.05388 |
| 60.84 | 0.03337 | 67.7539 | 0.04228 |
| 60.86 | 0.00164 | 67.7735 | 0.02387 |
| 60.88 | 0.02171 | 67.7932 | 0.02419 |
| 60.9  | 0.01454 | 67.8128 | 0.07279 |
| 60.92 | 0.00437 | 67.8325 | 0.05551 |
| 60.94 | 0.01366 | 67.8521 | 0.07799 |
| 60.96 | 0.02744 | 67.8718 | 0.06638 |

|       |          |         |         |
|-------|----------|---------|---------|
| 60.98 | 0.01098  | 67.8914 | 0.02411 |
| 61    | 0.01039  | 67.9111 | 0.10395 |
| 61.02 | 0.01968  | 67.9307 | 0.0861  |
| 61.04 | 0.0116   | 67.9504 | 0.09665 |
| 61.06 | 0.03107  | 67.97   | 0.15774 |
| 61.08 | 0.01312  | 67.9897 | 0.03141 |
| 61.1  | 0.02989  | 68.0094 | 0.09478 |
| 61.12 | 0.01703  | 68.029  | 0.04512 |
| 61.14 | 0.02003  | 68.0487 | 0.11985 |
| 61.16 | 0.02064  | 68.0683 | 0.04748 |
| 61.18 | 0.01825  | 68.088  | 0.04894 |
| 61.2  | 0.02066  | 68.1076 | 0.12708 |
| 61.22 | 0.01857  | 68.1273 | 0.22623 |
| 61.24 | 0.02756  | 68.1469 | 0.11637 |
| 61.26 | 0.01021  | 68.1666 | 0.06216 |
| 61.28 | 0.01022  | 68.1862 | 0.13121 |
| 61.3  | 0.01921  | 68.2059 | 0.15198 |
| 61.32 | 0.03269  | 68.2255 | 0.1648  |
| 61.34 | 0.01863  | 68.2452 | 0.21852 |
| 61.36 | 0.0345   | 68.2649 | 0.15353 |
| 61.38 | 0.01236  | 68.2845 | 0.14079 |
| 61.4  | 0.01087  | 68.3042 | 0.1803  |
| 61.42 | 0.02315  | 68.3238 | 0.16359 |
| 61.44 | 0.02975  | 68.3435 | 0.09973 |
| 61.46 | 0.02826  | 68.3631 | 0.18809 |
| 61.48 | 0.01779  | 68.3828 | 0.1816  |
| 61.5  | 0.03397  | 68.4024 | 0.1541  |
| 61.52 | 1.44E-04 | 68.4221 | 0.22712 |
| 61.54 | 0.02021  | 68.4417 | 0.19905 |
| 61.56 | 0.0295   | 68.4614 | 0.24481 |
| 61.58 | 0.01275  | 68.481  | 0.24684 |
| 61.6  | 0.03012  | 68.5007 | 0.25284 |
| 61.62 | 0.02414  | 68.5204 | 0.23613 |
| 61.64 | 0.02774  | 68.54   | 0.22736 |
| 61.66 | 0.02805  | 68.5597 | 0.35946 |
| 61.68 | 0.01818  | 68.5793 | 0.31662 |
| 61.7  | 0.02358  | 68.599  | 0.29933 |
| 61.72 | 0.00383  | 68.6186 | 0.38883 |
| 61.74 | 0.02     | 68.6383 | 0.38518 |
| 61.76 | 0.0251   | 68.6579 | 0.35199 |
| 61.78 | 0.01882  | 68.6776 | 0.48408 |
| 61.8  | 0.03171  | 68.6972 | 0.36911 |
| 61.82 | 0.00956  | 68.7169 | 0.39954 |
| 61.84 | 0.02633  | 68.7365 | 0.31637 |
| 61.86 | 0.02694  | 68.7562 | 0.43427 |
| 61.88 | 0.01857  | 68.7758 | 0.37723 |
| 61.9  | 0.00989  | 68.7955 | 0.35937 |

|       |         |         |          |
|-------|---------|---------|----------|
| 61.92 | 0.04164 | 68.8152 | 0.3614   |
| 61.94 | 0.01321 | 68.8348 | 0.30095  |
| 61.96 | 0.04166 | 68.8545 | 0.32002  |
| 61.98 | 0.0243  | 68.8741 | 0.33569  |
| 62    | 0.03269 | 68.8938 | 0.25876  |
| 62.02 | 0.01324 | 68.9134 | 0.26818  |
| 62.04 | 0.02613 | 68.9331 | 0.25998  |
| 62.06 | 0.01925 | 68.9527 | 0.28189  |
| 62.08 | 0.02674 | 68.9724 | 0.24302  |
| 62.1  | 0.03034 | 68.992  | 0.22688  |
| 62.12 | 0.03784 | 69.0117 | 0.17722  |
| 62.14 | 0.01629 | 69.0313 | 0.21958  |
| 62.16 | 0.02109 | 69.051  | 0.19718  |
| 62.18 | 0.0196  | 69.0707 | 0.15491  |
| 62.2  | 0.01692 | 69.0903 | 0.13819  |
| 62.22 | 0.03399 | 69.11   | 0.12602  |
| 62.24 | 0.01813 | 69.1296 | 0.17406  |
| 62.26 | 0.01784 | 69.1493 | 0.11645  |
| 62.28 | 0.02174 | 69.1689 | 0.15596  |
| 62.3  | 0.02474 | 69.1886 | 0.05803  |
| 62.32 | 0.02924 | 69.2082 | 0.11629  |
| 62.34 | 0.01818 | 69.2279 | 0.15182  |
| 62.36 | 0.01639 | 69.2475 | 0.08343  |
| 62.38 | 0.02418 | 69.2672 | 0.04058  |
| 62.4  | 0.01581 | 69.2868 | 0.0676   |
| 62.42 | 0.02001 | 69.3065 | 0.05259  |
| 62.44 | 0.0305  | 69.3262 | 0.08756  |
| 62.46 | 0.02092 | 69.3458 | 0.04756  |
| 62.48 | 0.04459 | 69.3655 | 0.10639  |
| 62.5  | 0.044   | 69.3851 | 0.12375  |
| 62.52 | 0.01197 | 69.4048 | 0.00253  |
| 62.54 | 0.02395 | 69.4244 | 0.07783  |
| 62.56 | 0.03265 | 69.4441 | 0.11166  |
| 62.58 | 0.02128 | 69.4637 | 0.03304  |
| 62.6  | 0.00332 | 69.4834 | 0.08846  |
| 62.62 | 0.02549 | 69.503  | 0.07061  |
| 62.64 | 0.0225  | 69.5227 | 0.07207  |
| 62.66 | 0.02221 | 69.5423 | -0.00883 |
| 62.68 | 0.0336  | 69.562  | 0.06476  |
| 62.7  | 0.01295 | 69.5817 | 0.02079  |
| 62.72 | 0.01505 | 69.6013 | 0.02509  |
| 62.74 | 0.02255 | 69.621  | 0.04302  |
| 62.76 | 0.01597 | 69.6406 | 0.03085  |
| 62.78 | 0.01927 | 69.6603 | 0.00902  |
| 62.8  | 0.04084 | 69.6799 | 0.06955  |
| 62.82 | 0.01779 | 69.6996 | 0.00399  |
| 62.84 | 0.0202  | 69.7192 | 0.04351  |

|       |          |         |          |
|-------|----------|---------|----------|
| 62.86 | 0.00554  | 69.7389 | -0.00615 |
| 62.88 | 0.00554  | 69.7585 | 0.01689  |
| 62.9  | 0.0298   | 69.7782 | 0.05414  |
| 62.92 | 0.02772  | 69.7978 | 0.04878  |
| 62.94 | 0.03581  | 69.8175 | 0.04172  |
| 62.96 | 0.03043  | 69.8371 | -0.00737 |
| 62.98 | 0.03104  | 69.8568 | 0.08667  |
| 63    | 0.0062   | 69.8765 | 0.03247  |
| 63.02 | 0.00976  | 69.8961 | 9.89E-04 |
| 63.04 | 0.02724  | 69.9158 | 0.01097  |
| 63.06 | 0.00401  | 69.9354 | 0.03458  |
| 63.08 | 0.01192  | 69.9551 | 0.06047  |
| 63.1  | -0.00234 | 69.9747 | 0.01024  |
| 63.12 | 0.01635  | 69.9944 | 0.11848  |
| 63.14 | 0.00659  | 70.014  | 0.08359  |
| 63.16 | 0.0076   | 70.0337 | 0.01462  |
| 63.18 | 0.00982  | 70.0533 | 0.11264  |
| 63.2  | 0.01802  | 70.073  | 0.01925  |
| 63.22 | 0.01725  | 70.0926 | 0.00424  |
| 63.24 | 0.00659  | 70.1123 | 0.08351  |
| 63.26 | 0.00132  | 70.132  | -0.0184  |
| 63.28 | 0.00653  | 70.1516 | 0.06428  |
| 63.3  | 0.00934  | 70.1713 | 0.08335  |
| 63.32 | 0.02174  | 70.1909 | 0.02915  |
| 63.34 | 0.01018  | 70.2106 | -0.02165 |
| 63.36 | 0.0091   | 70.2302 | 0.03893  |
| 63.38 | 0.00593  | 70.2695 | 0.08681  |
| 63.4  | 0.01503  | 70.2892 | 0.0139   |
| 63.42 | 0.00766  | 70.3088 | -0.01072 |
| 63.44 | 0.02605  | 70.3285 | 0.02373  |
| 63.46 | 0.01808  | 70.3481 | 0.05477  |
| 63.48 | 0.02689  | 70.3678 | 0.1      |
| 63.5  | 0.02521  | 70.3875 | 0.07084  |
| 63.52 | -0.00251 | 70.4071 | 0.05927  |
| 63.54 | 0.01078  | 70.4268 | 0.07498  |
| 63.56 | 0.01     | 70.4464 | 0.03843  |
| 63.58 | 0.02449  | 70.4661 | 0.03369  |
| 63.6  | 0.01144  | 70.4857 | 0.07892  |
| 63.62 | 0.01934  | 70.5054 | 0.06055  |
| 63.64 | 0.01916  | 70.525  | 0.03536  |
| 63.66 | 0.01509  | 70.5447 | 0.03743  |
| 63.68 | 0.00353  | 70.5643 | 0.01735  |
| 63.7  | 0.02401  | 70.584  | 0.03873  |
| 63.72 | 0.00737  | 70.6036 | 0.07091  |
| 63.74 | 0.01587  | 70.6233 | 0.05537  |
| 63.76 | 0.03335  | 70.643  | -0.0039  |
| 63.78 | 0.0206   | 70.6626 | -0.02284 |

|       |         |         |           |
|-------|---------|---------|-----------|
| 63.8  | 0.01862 | 70.6823 | 0.01104   |
| 63.82 | 0.01844 | 70.7019 | -0.00166  |
| 63.84 | 0.01826 | 70.7216 | 0.04187   |
| 63.86 | 0.01659 | 70.7412 | 0.04281   |
| 63.88 | 0.01012 | 70.7609 | -0.00624  |
| 63.9  | 0.00964 | 70.7805 | -0.01609  |
| 63.92 | 0.02892 | 70.8002 | 0.07913   |
| 63.94 | 0.02575 | 70.8198 | 0.0511    |
| 63.96 | 0.02557 | 70.8395 | 0.01852   |
| 63.98 | 0.03078 | 70.8591 | -0.02541  |
| 64    | 0.03718 | 70.8984 | 0.01565   |
| 64.02 | 0.01605 | 70.9181 | 0.0234    |
| 64.04 | 0.04162 | 70.9378 | 0.03911   |
| 64.06 | 0.04323 | 70.9574 | -0.02244  |
| 64.08 | 0.02509 | 70.9771 | 0.05915   |
| 64.1  | 0.03629 | 70.9967 | 0.07429   |
| 64.12 | 0.04778 | 71.0164 | -0.01111  |
| 64.14 | 0.03144 | 71.036  | 0.08127   |
| 64.16 | 0.02227 | 71.0557 | 0.05494   |
| 64.18 | 0.03108 | 71.0753 | 0.04338   |
| 64.2  | 0.03299 | 71.095  | 0.07045   |
| 64.22 | 0.0394  | 71.1146 | 0.01686   |
| 64.24 | 0.04102 | 71.1343 | 0.0354    |
| 64.26 | 0.03156 | 71.1539 | 0.04031   |
| 64.28 | 0.04784 | 71.1736 | 0.0208    |
| 64.3  | 0.03329 | 71.1933 | 0.00867   |
| 64.32 | 0.03401 | 71.2129 | 0.04028   |
| 64.34 | 0.06108 | 71.2522 | 0.02966   |
| 64.36 | 0.05611 | 71.2719 | 0.07376   |
| 64.38 | 0.04575 | 71.3112 | 0.03473   |
| 64.4  | 0.05455 | 71.3308 | 0.01693   |
| 64.42 | 0.06754 | 71.3505 | 0.02922   |
| 64.44 | 0.09341 | 71.3701 | 0.0171    |
| 64.46 | 0.07197 | 71.3898 | 0.0044    |
| 64.48 | 0.0679  | 71.4094 | 0.06781   |
| 64.5  | 0.06862 | 71.4291 | -0.01815  |
| 64.52 | 0.06215 | 71.4488 | 0.05492   |
| 64.54 | 0.07605 | 71.4684 | 0.00928   |
| 64.56 | 0.07167 | 71.5077 | 0.05545   |
| 64.58 | 0.0706  | 71.5274 | 0.01493   |
| 64.6  | 0.08569 | 71.547  | -6.08E-04 |
| 64.62 | 0.05587 | 71.5667 | 0.05599   |
| 64.64 | 0.07455 | 71.5863 | -0.01918  |
| 64.66 | 0.09383 | 71.606  | 0.0482    |
| 64.68 | 0.09335 | 71.6256 | -0.01107  |
| 64.7  | 0.0767  | 71.6453 | 0.04155   |
| 64.72 | 0.0864  | 71.6649 | -0.01147  |

|       |         |         |           |
|-------|---------|---------|-----------|
| 64.74 | 0.0994  | 71.6846 | 0.0599    |
| 64.76 | 0.06778 | 71.7043 | 0.04834   |
| 64.78 | 0.05593 | 71.7239 | 0.04021   |
| 64.8  | 0.07042 | 71.7436 | 0.03189   |
| 64.82 | 0.06485 | 71.7632 | 0.04914   |
| 64.84 | 0.06287 | 71.7829 | 0.034     |
| 64.86 | 0.06569 | 71.8025 | 0.02057   |
| 64.88 | 0.04515 | 71.8222 | 0.05144   |
| 64.9  | 0.06623 | 71.8418 | -0.02617  |
| 64.92 | 0.05886 | 71.8615 | 0.02685   |
| 64.94 | 0.05539 | 71.8811 | -0.00533  |
| 64.96 | 0.07197 | 71.9008 | -0.0057   |
| 64.98 | 0.05233 | 71.9204 | 0.01211   |
| 65    | 0.07311 | 71.9597 | 0.0642    |
| 65.02 | 0.06335 | 71.9794 | 0.05076   |
| 65.04 | 0.06257 | 71.9991 | 0.05437   |
| 65.06 | 0.05311 | 72.0187 | 0.02106   |
| 65.08 | 0.03347 | 72.0384 | 0.02694   |
| 65.1  | 0.03958 | 72.058  | 0.03964   |
| 65.12 | 0.02383 | 72.0777 | 0.01144   |
| 65.14 | 0.04671 | 72.0973 | 0.02243   |
| 65.16 | 0.04982 | 72.117  | -9.11E-05 |
| 65.18 | 0.05593 | 72.1366 | 0.04214   |
| 65.2  | 0.04976 | 72.1759 | -0.02846  |
| 65.22 | 0.04659 | 72.1956 | 0.07454   |
| 65.24 | 0.04491 | 72.2152 | 0.03499   |
| 65.26 | 0.03844 | 72.2349 | 0.05677   |
| 65.28 | 0.03198 | 72.2546 | 0.08934   |
| 65.3  | 0.04317 | 72.2939 | 0.05226   |
| 65.32 | 0.02443 | 72.3135 | 0.0695    |
| 65.34 | 0.02395 | 72.3332 | 0.02426   |
| 65.36 | 0.0118  | 72.3725 | 0.04908   |
| 65.38 | 0.03078 | 72.3921 | 0.06462   |
| 65.4  | 0.01293 | 72.4118 | 0.0563    |
| 65.42 | 0.02593 | 72.4314 | 0.04627   |
| 65.44 | 0.02874 | 72.4511 | 0.04477   |
| 65.46 | 0.02467 | 72.4707 | 0.06769   |
| 65.48 | 0.03497 | 72.4904 | 0.02188   |
| 65.5  | 0.04736 | 72.5101 | -0.00745  |
| 65.52 | 0.03251 | 72.5297 | 0.05749   |
| 65.54 | 0.04401 | 72.5494 | 0.04293   |
| 65.56 | 0.03485 | 72.569  | 0.03575   |
| 65.58 | 0.03257 | 72.5887 | 0.02004   |
| 65.6  | 0.03239 | 72.6083 | 0.04807   |
| 65.62 | 0.0373  | 72.628  | 0.00908   |
| 65.64 | 0.02126 | 72.6476 | 0.01723   |
| 65.66 | 0.03904 | 72.6673 | 0.0464    |



|       |         |         |           |
|-------|---------|---------|-----------|
| 65.68 | 0.03706 | 72.6869 | 0.06989   |
| 65.7  | 0.03569 | 72.7066 | 0.00477   |
| 65.72 | 0.02114 | 72.7262 | 0.04018   |
| 65.74 | 0.03293 | 72.7459 | -0.01244  |
| 65.76 | 0.01569 | 72.7656 | 0.02979   |
| 65.78 | 0.02599 | 72.7852 | 0.04192   |
| 65.8  | 0.02461 | 72.8049 | 0.05291   |
| 65.82 | 0.04808 | 72.8245 | -8.45E-04 |
| 65.84 | 0.02575 | 72.8638 | -0.01294  |
| 65.86 | 0.01329 | 72.8835 | 0.0202    |
| 65.88 | 0.04485 | 72.9031 | 0.01756   |
| 65.9  | 0.02431 | 72.9228 | -0.00212  |
| 65.92 | 0.02593 | 72.9424 | -0.01441  |
| 65.94 | 0.02245 | 72.9621 | 0.00623   |
| 65.96 | 0.01419 | 72.9817 | -0.01572  |
| 65.98 | 0.03048 | 73.0014 | 0.0072    |
| 66    | 0.02192 | 73.0407 | 0.02009   |
| 66.02 | 0.03521 | 73.0604 | 0.01973   |
| 66.04 | 0.02964 | 73.08   | 0.008     |
| 66.06 | 0.02287 | 73.0997 | 0.02524   |
| 66.08 | 0.03467 | 73.1193 | 0.04077   |
| 66.1  | 0.04377 | 73.139  | 0.00689   |
| 66.12 | 0.01784 | 73.1586 | 0.00426   |
| 66.14 | 0.03862 | 73.1783 | 0.03853   |
| 66.16 | 0.0121  | 73.1979 | 0.03078   |
| 66.18 | 0.03018 | 73.2176 | 0.0094    |
| 66.2  | 0.03389 | 73.2372 | 0.01017   |
| 66.22 | 0.03461 | 73.2569 | 0.03081   |
| 66.24 | 0.02186 | 73.2765 | 0.03612   |
| 66.26 | 0.02407 | 73.2962 | 0.05166   |
| 66.28 | 0.0179  | 73.3159 | 0.05981   |
| 66.3  | 0.02401 | 73.3355 | 0.00605   |
| 66.32 | 0.01605 | 73.3552 | 0.02897   |
| 66.34 | 0.02844 | 73.3748 | 0.03315   |
| 66.36 | 0.02168 | 73.4141 | 0.02844   |
| 66.38 | 0.03347 | 73.4338 | 0.03943   |
| 66.4  | 0.02072 | 73.4534 | 0.01634   |
| 66.42 | 0.02263 | 73.4731 | 0.0438    |
| 66.44 | 0.02844 | 73.4927 | 0.07808   |
| 66.46 | 0.02707 | 73.5124 | -0.0126   |
| 66.48 | 0.03168 | 73.532  | 0.0268    |
| 66.5  | 0.0315  | 73.5517 | 0.07129   |
| 66.52 | 0.01695 | 73.5714 | 0.02322   |
| 66.54 | 0.03982 | 73.591  | 0.00638   |
| 66.56 | 0.04144 | 73.6107 | 0.01623   |
| 66.58 | 0.02748 | 73.6303 | -0.0131   |
| 66.6  | 0.02072 | 73.65   | 0.04276   |

|       |         |         |          |
|-------|---------|---------|----------|
| 66.62 | 0.03042 | 73.6696 | 0.0458   |
| 66.64 | 0.01557 | 73.6893 | 0.06133  |
| 66.66 | 0.01748 | 73.7089 | 0.02462  |
| 66.68 | 0.0221  | 73.7286 | 0.02425  |
| 66.7  | 0.03539 | 73.7482 | 0.0324   |
| 66.72 | 0.01335 | 73.7679 | 0.03601  |
| 66.74 | 0.02635 | 73.7875 | 0.04246  |
| 66.76 | 0.03425 | 73.8072 | 0.0648   |
| 66.78 | 0.02569 | 73.8268 | 0.02979  |
| 66.8  | 0.0318  | 73.8465 | 0.04419  |
| 66.82 | 0.02263 | 73.8662 | 8.92E-05 |
| 66.84 | 0.02096 | 73.8858 | -0.02129 |
| 66.86 | 0.02886 | 73.9055 | 0.01355  |
| 66.88 | 0.03198 | 73.9251 | 0.00751  |
| 66.9  | 0.03659 | 73.9448 | 0.02985  |
| 66.92 | 0.0406  | 73.9644 | 0.0221   |
| 66.94 | 0.02695 | 73.9841 | 0.0507   |
| 66.96 | 0.03635 | 74.0037 | 0.03216  |
| 66.98 | 0.04605 | 74.0234 | 0.01986  |
| 67    | 0.0294  | 74.0627 | 0.02481  |
| 67.02 | 0.03521 | 74.0823 | 0.02614  |
| 67.04 | 0.05808 | 74.102  | 0.02918  |
| 67.06 | 0.03335 | 74.1217 | 0.0538   |
| 67.08 | 0.04964 | 74.1413 | -0.02211 |
| 67.1  | 0.03838 | 74.161  | 0.04739  |
| 67.12 | 0.03401 | 74.1806 | -0.01659 |
| 67.14 | 0.04461 | 74.2003 | 0.03643  |
| 67.16 | 0.03305 | 74.2199 | 0.04742  |
| 67.18 | 0.0173  | 74.2396 | 0.01468  |
| 67.2  | 0.01383 | 74.2592 | 0.02113  |
| 67.22 | 0.04    | 74.2789 | 0.00315  |
| 67.24 | 0.02695 | 74.2985 | 0.03232  |
| 67.26 | 0.04413 | 74.3182 | 0.01661  |
| 67.28 | 0.05233 | 74.3378 | 0.01908  |
| 67.3  | 0.04916 | 74.3575 | 0.04144  |
| 67.32 | 0.02323 | 74.3772 | 0.0547   |
| 67.34 | 0.05209 | 74.3968 | 0.03161  |
| 67.36 | 0.04144 | 74.4165 | -0.00227 |
| 67.38 | 0.02748 | 74.4361 | 0.04962  |
| 67.4  | 0.04766 | 74.4558 | 0.01631  |
| 67.4  | 0.05275 | 74.4754 | 0.03752  |
| 67.42 | 0.05257 | 74.5147 | 0.05155  |
| 67.44 | 0.05269 | 74.5344 | -0.00107 |
| 67.46 | 0.04952 | 74.554  | 0.00197  |
| 67.48 | 0.05413 | 74.5737 | 0.03341  |
| 67.5  | 0.05275 | 74.613  | 0.00541  |
| 67.52 | 0.06754 | 74.6327 | 0.01186  |

|       |         |         |          |
|-------|---------|---------|----------|
| 67.54 | 0.07126 | 74.6523 | 0.00979  |
| 67.56 | 0.04712 | 74.672  | -0.00308 |
| 67.58 | 0.05533 | 74.6916 | 0.0596   |
| 67.6  | 0.06802 | 74.7113 | -0.00665 |
| 67.62 | 0.05407 | 74.7309 | 0.03387  |
| 67.64 | 0.05539 | 74.7506 | 0.04032  |
| 67.66 | 0.07018 | 74.7702 | -0.0123  |
| 67.68 | 0.04305 | 74.7899 | -0.00813 |
| 67.7  | 0.06233 | 74.8095 | 0.05626  |
| 67.72 | 0.05976 | 74.8292 | 0.02351  |
| 67.74 | 0.07245 | 74.8488 | -0.01605 |
| 67.76 | 0.06928 | 74.8685 | -0.00164 |
| 67.78 | 0.06281 | 74.8881 | -0.02701 |
| 67.8  | 0.07311 | 74.9078 | 0.04874  |
| 67.82 | 0.05886 | 74.9275 | 0.02735  |
| 67.84 | 0.06527 | 74.9471 | 0.00427  |
| 67.86 | 0.07317 | 74.9668 | 0.04025  |
| 67.88 | 0.05503 | 74.9864 | 0.03477  |
| 67.9  | 0.08718 | 75.0061 | 0.03156  |
| 67.92 | 0.08042 | 75.0257 | 0.04255  |
| 67.94 | 0.06497 | 75.0454 | 0.01435  |
| 67.96 | 0.07736 | 75.065  | -0.00306 |
| 67.98 | 0.08167 | 75.0847 | 0.01702  |
| 68    | 0.07072 | 75.1043 | -0.01004 |
| 68.02 | 0.09419 | 75.124  | 0.0214   |
| 68.04 | 0.09072 | 75.1436 | 0.03182  |
| 68.06 | 0.08964 | 75.1633 | -0.01966 |
| 68.08 | 0.08736 | 75.2026 | -0.01699 |
| 68.1  | 0.07102 | 75.2419 | -0.01318 |
| 68.12 | 0.0882  | 75.2812 | 0.03777  |
| 68.14 | 0.07036 | 75.3009 | 0.0266   |
| 68.16 | 0.07856 | 75.3205 | -0.01693 |
| 68.18 | 0.08317 | 75.3402 | 0.00826  |
| 68.2  | 0.07491 | 75.3598 | 0.05049  |
| 68.22 | 0.06784 | 75.3795 | 0.04614  |
| 68.24 | 0.06257 | 75.3991 | 0.06452  |
| 68.26 | 0.08365 | 75.4188 | 0.06075  |
| 68.28 | 0.06311 | 75.4581 | 0.01457  |
| 68.3  | 0.07161 | 75.4778 | 0.02102  |
| 68.32 | 0.05257 | 75.4974 | 2.06E-04 |
| 68.34 | 0.08024 | 75.5171 | -0.01209 |
| 68.36 | 0.06239 | 75.5367 | 0.02844  |
| 68.38 | 0.05982 | 75.5564 | 0.01727  |
| 68.4  | 0.05066 | 75.576  | 0.026    |
| 68.42 | 0.05617 | 75.5957 | 0.02562  |
| 68.44 | 0.06706 | 75.635  | 0.06067  |
| 68.46 | 0.04233 | 75.6546 | 0.0126   |

|          |         |         |          |
|----------|---------|---------|----------|
| 68.48    | 0.04904 | 75.6743 | 0.01904  |
| 68.5     | 0.05245 | 75.694  | 0.01015  |
| 68.52    | 0.04778 | 75.7136 | 0.02115  |
| 68.54    | 0.05659 | 75.7333 | -0.00592 |
| 68.56    | 0.04114 | 75.7529 | -0.02332 |
| 68.58    | 0.03497 | 75.7726 | -0.01688 |
| 68.6     | 0.03689 | 75.7922 | -0.02349 |
| 68.62    | 0.02922 | 75.8119 | 0.00908  |
| 68.64    | 0.03862 | 75.8315 | 0.06438  |
| 68.66    | 0.02976 | 75.8512 | 0.03447  |
| 68.68    | 0.03587 | 75.8708 | 0.02843  |
| 68.7     | 0.01293 | 75.8905 | 0.0184   |
| 68.72    | 0.02922 | 75.9101 | 0.02485  |
| 68.74    | 0.02425 | 75.9298 | 0.00404  |
| 68.76    | 0.04413 | 75.9494 | 0.02582  |
| 68.78    | 0.05443 | 75.9691 | -0.02737 |
| 68.8     | 0.0276  | 75.9888 | 0.03757  |
| 68.82    | 0.0418  | 76.0084 | 0.02131  |
| 68.84    | 0.04251 | 76.0281 | 0.06012  |
| 68.86    | 0.03724 | 76.0477 | 0.05805  |
| 68.88    | 0.02599 | 76.0674 | 0.006    |
| 68.9     | 0.02341 | 76.087  | 0.06413  |
| 68.92    | 0.02293 | 76.1067 | 0.02401  |
| 68.94    | 0.0476  | 76.146  | 0.04485  |
| 68.96    | 0.02227 | 76.1656 | 0.0638   |
| 68.98    | 0.02479 | 76.1853 | 0.01061  |
| 69       | 0.02401 | 76.2246 | 0.03316  |
| 69.02    | 0.02593 | 76.2443 | -0.0064  |
| 69.04    | 0.03084 | 76.2639 | 0.00346  |
| 69.06    | 0.02557 | 76.2836 | 0.03092  |
| 69.08    | 0.01042 | 76.3032 | 0.06349  |
| 69.1     | 0.02461 | 76.3229 | 0.06426  |
| 69.12    | 0.01904 | 76.3425 | 0.04742  |
| 69.14    | 0.02365 | 76.3622 | 0.03512  |
| 69.16    | 0.01838 | 76.3818 | 0.02283  |
| 69.18 -- |         | 76.4015 | 0.02416  |
| 69.2     | 0.0279  | 76.4211 | 0.01187  |
| 69.22    | 0.02473 | 76.4408 | 0.04785  |
| 69.24    | 0.02635 | 76.4604 | 0.00375  |
| 69.26    | 0.0094  | 76.4998 | 0.04504  |
| 69.28    | 0.02689 | 76.5194 | 0.00378  |
| 69.3     | 0.0309  | 76.5391 | 0.01932  |
| 69.32    | 0.03162 | 76.5587 | 0.04848  |
| 69.34    | 0.00599 | 76.5784 | 0.0413   |
| 69.36    | 0.02826 | 76.598  | 0.00401  |
| 69.38    | 0.0173  | 76.6177 | 0.04056  |
| 69.4     | 0.00425 | 76.6373 | 0.03679  |

|          |           |         |           |
|----------|-----------|---------|-----------|
| 69.42    | 0.01964   | 76.657  | 0.01881   |
| 69.44    | 0.02605   | 76.6766 | -0.01279  |
| 69.46    | 0.02976   | 76.6963 | 0.03      |
| 69.48    | 0.02329   | 76.7159 | -0.01467  |
| 69.5     | 0.01563   | 76.7356 | 0.04006   |
| 69.52    | 0.02263   | 76.7553 | -0.00632  |
| 69.54    | 0.01796   | 76.7749 | 0.06602   |
| 69.56    | 0.02108   | 76.7946 | 0.05997   |
| 69.58    | 0.00623   | 76.8142 | -0.00912  |
| 69.6     | 0.00695   | 76.8339 | 0.00414   |
| 69.62    | 0.02383   | 76.8535 | -0.01611  |
| 69.64    | 0.01407   | 76.8732 | -0.00455  |
| 69.66    | 0.01269   | 76.9125 | -7.43E-04 |
| 69.68    | 0.02988   | 76.9321 | 0.01593   |
| 69.7     | 0.00395   | 76.9518 | 0.0644    |
| 69.72    | 0.02174   | 76.9714 | 0.00156   |
| 69.74    | 0.03293   | 76.9911 | 0.03243   |
| 69.76    | 0.01509   | 77.0107 | -0.00429  |
| 69.78    | 0.00892   | 77.0304 | 0.01466   |
| 69.8     | 0.00754   | 77.0501 | 0.01031   |
| 69.82    | 0.01126   | 77.0697 | 0.01392   |
| 69.84    | 0.00629   | 77.0894 | 0.06069   |
| 69.86    | 0.01898   | 77.109  | 0.04556   |
| 69.88    | 0.01371   | 77.1287 | 0.05144   |
| 69.9     | 0.00784   | 77.1483 | 0.05277   |
| 69.92    | 0.02802   | 77.168  | 0.03082   |
| 69.94    | 0.01527   | 77.1876 | 0.05431   |
| 69.96    | 0.01239   | 77.2073 | 0.02611   |
| 69.98    | 0.01371   | 77.2269 | -0.01004  |
| 70       | 0.02102   | 77.2466 | 0.02253   |
| 70.02    | 0.01575   | 77.2662 | 0.04375   |
| 70.04    | 0.01228   | 77.2859 | 0.02464   |
| 70.06    | 0.00731   | 77.3056 | 0.05948   |
| 70.08    | 0.00234   | 77.3252 | 0.01709   |
| 70.1     | 0.01982   | 77.3842 | 0.01485   |
| 70.12    | 0.00796   | 77.4038 | 0.02925   |
| 70.14 -- |           | 77.4235 | 0.03285   |
| 70.16    | 0.02227   | 77.4431 | 0.02169   |
| 70.18    | 0.01132   | 77.4628 | -0.00764  |
| 70.2     | -2.40E-04 | 77.4824 | 0.02777   |
| 70.22    | 0.01365   | 77.5021 | 0.03024   |
| 70.24    | 0.03802   | 77.5217 | -0.00647  |
| 70.26    | 0.0106    | 77.5414 | 0.05904   |
| 70.28    | 0.02659   | 77.5611 | -0.00437  |
| 70.3     | 0.00964   | 77.5807 | 0.05547   |
| 70.32    | -0.00102  | 77.6004 | -0.02555  |
| 70.34    | 0.00898   | 77.62   | -0.0174   |

|       |          |         |          |
|-------|----------|---------|----------|
| 70.36 | 0.01958  | 77.6397 | 0.03959  |
| 70.38 | 0.01371  | 77.6593 | 0.03923  |
| 70.4  | 0.00605  | 77.679  | 0.00705  |
| 70.42 | 0.01156  | 77.6986 | -0.01092 |
| 70.44 | 0.01677  | 77.7183 | -0.0022  |
| 70.46 | 0.00192  | 77.7379 | 0.00141  |
| 70.48 | 0.01162  | 77.7576 | 0.00728  |
| 70.5  | 0.00784  | 77.7772 | 0.01884  |
| 70.52 | 0.01784  | 77.7969 | -0.00481 |
| 70.54 | 0.00539  | 77.8166 | 0.01356  |
| 70.56 | 0.00222  | 77.8362 | 0.02115  |
| 70.58 | 0.02299  | 77.8559 | 0.04293  |
| 70.6  | 0.01503  | 77.8755 | 0.01303  |
| 70.62 | 0.02114  | 77.8952 | -0.00754 |
| 70.64 | 0.00719  | 77.9148 | 0.0682   |
| 70.66 | 0.03305  | 77.9345 | 0.0241   |
| 70.68 | 0.00413  | 77.9541 | 0.00157  |
| 70.7  | 0.01263  | 77.9738 | 0.05289  |
| 70.72 | -0.00491 | 77.9934 | -0.002   |
| 70.74 | 0.01407  | 78.0131 | 0.04989  |
| 70.76 | 0.01269  | 78.0327 | 0.0569   |
| 70.78 | 0.02299  | 78.0524 | 0.0145   |
| 70.8  | 3.59E-04 | 78.072  | -0.00461 |
| 70.82 | 0.02233  | 78.0917 | 0.05352  |
| 70.84 | 0.00808  | 78.1114 | -0.00194 |
| 70.86 | 0.01599  | 78.131  | 0.01019  |
| 70.88 | 0.01641  | 78.1507 | 0.0598   |
| 70.9  | -0.00443 | 78.1703 | 0.01059  |
| 70.92 | 0.00108  | 78.19   | 0.06872  |
| 70.94 | 0.01347  | 78.2096 | 0.02292  |
| 70.96 | 0.01269  | 78.2293 | 0.04413  |
| 70.98 | 0.00503  | 78.2489 | 0.03354  |
| 71    | 0.00784  | 78.2686 | 0.03317  |
| 71.02 | 0.01605  | 78.2882 | 0.05268  |
| 71.04 | 0.01078  | 78.3079 | 0.0171   |
| 71.06 | 0.01479  | 78.3275 | 0.06614  |
| 71.08 | 0.00563  | 78.3472 | 0.05726  |
| 71.1  | 0.01383  | 78.3669 | 0.02508  |
| 71.12 | 0.00766  | 78.3865 | 0.05595  |
| 71.14 | 0.00778  | 78.4062 | -0.01882 |
| 71.16 | 0.01509  | 78.4258 | 0.05465  |
| 71.18 | -0.00365 | 78.4455 | 0.06905  |
| 71.2  | 0.01802  | 78.4651 | 0.04312  |
| 71.22 | 0.00587  | 78.4848 | 0.03878  |
| 71.24 | 0.0018   | 78.5044 | -0.00532 |
| 71.26 | 0.0106   | 78.5241 | 0.01816  |
| 71.28 | 0.00473  | 78.5437 | 0.01609  |

|       |           |         |          |
|-------|-----------|---------|----------|
| 71.3  | 0.01772   | 78.6027 | -0.01796 |
| 71.32 | 0.00108   | 78.6224 | 0.02825  |
| 71.34 | 0.01527   | 78.642  | 0.0063   |
| 71.36 | 0.01778   | 78.6617 | 0.03489  |
| 71.38 | 0.0203    | 78.6813 | 0.05611  |
| 71.4  | -2.40E-04 | 78.701  | 0.05291  |
| 71.42 | 0.01605   | 78.7206 | 0.05594  |
| 71.44 | 0.00479   | 78.7403 | -0.00236 |
| 71.46 | 0.00581   | 78.7599 | 0.01545  |
| 71.48 | 0.01431   | 78.7796 | 0.00429  |
| 71.5  | -0.01012  | 78.7992 | 0.03857  |
| 71.52 | 0.02772   | 78.8189 | 0.03877  |
| 71.54 | 0.00689   | 78.8385 | 0.07418  |
| 71.56 | 0.0109    | 78.8582 | 0.05393  |
| 71.58 | 0.0188    | 78.8779 | 0.06038  |
| 71.6  | 9.58E-04  | 78.8975 | 0.0532   |
| 71.62 | 0.02503   | 78.9172 | 0.02329  |
| 71.64 | 0.01317   | 78.9368 | 0.01043  |
| 71.66 | 0.0094    | 78.9565 | 0.04982  |
| 71.68 | -3.59E-04 | 78.9761 | 0.05854  |
| 71.7  | 0.00874   | 78.9958 | 0.08089  |
| 71.72 | 0.00737   | 79.0154 | 0.09245  |
| 71.74 | 0.01527   | 79.0351 | 0.06369  |
| 71.76 | 0.00461   | 79.0547 | 0.09853  |
| 71.78 | 0.01162   | 79.0744 | 0.00445  |
| 71.8  | 0.01353   | 79.094  | 0.11029  |
| 71.82 | 0.00677   | 79.1137 | 0.073    |
| 71.84 | 0.01018   | 79.1333 | 0.09422  |
| 71.86 | 0.02826   | 79.153  | 0.05523  |
| 71.88 | 0.0194    | 79.1727 | 0.07019  |
| 71.9  | 0.01473   | 79.1923 | 0.06244  |
| 71.92 | 0.00467   | 79.212  | 0.04901  |
| 71.94 | 0.00868   | 79.2316 | 0.11566  |
| 71.96 | 0.0079    | 79.2513 | 0.04885  |
| 71.98 | 0.01222   | 79.2709 | 0.06324  |
| 72    | 0.00814   | 79.2906 | -0.00301 |
| 72.02 | 0.01994   | 79.3102 | 0.01309  |
| 72.04 | 0.00509   | 79.3299 | 0.08543  |
| 72.06 | 0.00671   | 79.3495 | 0.06972  |
| 72.08 | 0.00503   | 79.3692 | 0.04209  |
| 72.1  | 0.02491   | 79.3888 | 0.05024  |
| 72.12 | 0.01844   | 79.4085 | 0.07714  |
| 72.14 | 0.01856   | 79.4282 | 0.03247  |
| 72.16 | 0.00162   | 79.4478 | 0.04005  |
| 72.18 | 0.0188    | 79.4675 | 0.12204  |
| 72.2  | 0.00246   | 79.4871 | 0.07339  |
| 72.22 | 0.01245   | 79.5068 | 0.11051  |

|       |          |         |          |
|-------|----------|---------|----------|
| 72.24 | -0.00269 | 79.5264 | 0.0488   |
| 72.26 | 0.0109   | 79.5461 | 0.08138  |
| 72.28 | 0.01222  | 79.5657 | 0.00717  |
| 72.3  | 0.01653  | 79.5854 | 0.03293  |
| 72.32 | 0.01186  | 79.605  | 0.05471  |
| 72.34 | 0.00269  | 79.6247 | 0.05264  |
| 72.36 | 0.00132  | 79.6443 | 0.05965  |
| 72.38 | 0.00293  | 79.664  | 0.08144  |
| 72.4  | 0.00216  | 79.6837 | 0.02938  |
| 72.42 | 0.01186  | 79.7033 | 0.02504  |
| 72.44 | 0.00719  | 79.723  | 0.0241   |
| 72.46 | 0.03066  | 79.7426 | 0.06009  |
| 72.48 | 0.00862  | 79.7623 | 0.06767  |
| 72.5  | 0.01475  | 79.7819 | 0.06844  |
| 72.52 | 0.01155  | 79.8016 | 0.02661  |
| 72.54 | 0.01644  | 79.8212 | 0.05123  |
| 72.56 | 0.01654  | 79.8409 | 0.06336  |
| 72.58 | 0.01934  | 79.8605 | 0.0255   |
| 72.6  | 0.00537  | 79.8802 | 0.01151  |
| 72.62 | 0.01774  | 79.8998 | 0.02079  |
| 72.64 | 4.75E-04 | 79.9195 | 0.02326  |
| 72.66 | 0.00866  | 79.9392 | 0.07344  |
| 72.68 | 0.01475  | 79.9588 | 0.03786  |
| 72.7  | 0.01575  | 79.9785 | 0.02841  |
| 72.72 | 0.01555  | 79.9981 | -0.00604 |
| 72.74 | 0.01145  | 80.0178 | 0.0254   |
| 72.76 | 0.01575  | 80.0374 | 6.08E-04 |
| 72.78 | 0.02423  | 80.0571 | 0.03205  |
| 72.8  | 0.01265  | 80.0767 | 0.05724  |
| 72.82 | 0.01036  | 80.0964 | 0.03074  |
| 72.84 | 0.02273  | 80.116  | 0.03776  |
| 72.86 | 0.00397  | 80.1357 | 0.00161  |
| 72.88 | 0.02832  | 80.1553 | 0.02055  |
| 72.9  | 0.01585  | 80.175  | 0.11163  |
| 72.92 | 0.00936  | 80.1946 | 0.09195  |
| 72.94 | 0.01754  | 80.2143 | 0.05125  |
| 72.96 | 0.02902  | 80.234  | 0.04236  |
| 72.98 | 0.01265  | 80.2536 | -0.00628 |
| 73    | 0.00766  | 80.2733 | 0.1166   |
| 73.02 | 0.02962  | 80.2929 | 0.08897  |
| 73.04 | 0.01625  | 80.3126 | 0.02272  |
| 73.06 | 0.00707  | 80.3322 | 0.07119  |
| 73.08 | 0.01555  | 80.3519 | 0.09355  |
| 73.1  | 0.01685  | 80.3715 | 0.01025  |
| 73.12 | 0.01395  | 80.3912 | -0.00829 |
| 73.14 | 2.81E-04 | 80.4108 | -0.00128 |
| 73.16 | 0.02074  | 80.4305 | 0.08128  |



|       |           |         |         |
|-------|-----------|---------|---------|
| 73.18 | 0.02204   | 80.4501 | 0.04456 |
| 73.2  | 0.01914   | 80.4698 | 0.06975 |
| 73.22 | 0.00936   | 80.4895 | 0.05462 |
| 73.24 | 0.01216   | 80.5091 | 0.13774 |
| 73.26 | -3.17E-04 | 80.5288 | 0.0499  |
| 73.28 | 0.00697   | 80.5484 | 0.02    |
| 73.3  | 0.02354   | 80.5681 | 0.0753  |
| 73.32 | 0.02184   | 80.5877 | 0.01984 |
| 73.34 | 0.01505   | 80.6074 | 0.05809 |
| 73.36 | 0.01246   | 80.627  | 0.09009 |
| 73.38 | -6.15E-04 | 80.6467 | 0.03804 |
| 73.4  | 0.02194   | 80.6663 | 0.0181  |
| 73.42 | 0.00887   | 80.686  | 0.02905 |
| 73.44 | 0.00448   | 80.7056 | 0.05306 |
| 73.46 | 0.00517   | 80.7843 | 0.01279 |
| 73.48 | 0.02144   | 80.8039 | 0.00954 |
| 73.5  | 0.00478   | 80.8236 | 0.05741 |
| 73.52 | 3.84E-04  | 80.8432 | 0.02235 |
| 73.54 | 0.00977   | 80.8629 | 0.01399 |
| 73.56 | 0.00987   | 80.8825 | 0.0255  |
| 73.58 | 0.01056   | 80.9022 | 0.01373 |
| 73.6  | 0.01246   | 80.9218 | 0.00764 |
| 73.62 | 0.00238   | 80.9415 | 0.05608 |
| 73.64 | 0.00458   | 80.9611 | 0.05737 |
| 73.66 | 0.01186   | 81      | 0.07927 |
| 73.68 | 0.00777   | 81.0197 | 0.06014 |
| 73.7  | 0.03033   | 81.059  | 0.12399 |
| 73.72 | 0.01486   | 81.0786 | 0.07025 |
| 73.74 | 0.00448   | 81.0983 | 0.03637 |
| 73.76 | 0.00967   | 81.1179 | 0.0683  |
| 73.78 | 0.01576   | 81.1376 | 0.04123 |
| 73.8  | 0.00987   | 81.1572 | 0.02777 |
| 73.82 | 0.01206   | 81.1769 | 0.07501 |
| 73.84 | 0.01995   | 81.1965 | 0.0122  |
| 73.86 | 0.00987   | 81.2162 | 0.03675 |
| 73.88 | 0.02943   | 81.2358 | 0.0352  |
| 73.9  | 0.00917   | 81.2555 | 0.06656 |
| 73.92 | 0.01376   | 81.2752 | 0.06842 |
| 73.94 | 0.00787   | 81.2948 | 0.03057 |
| 73.96 | 0.01216   | 81.3145 | 0.06817 |
| 73.98 | 0.00957   | 81.3341 | 0.04507 |
| 74    | 0.01925   | 81.3538 | 0.08948 |
| 74.02 | 0.00947   | 81.3734 | 0.07318 |
| 74.04 | 0.00298   | 81.3931 | 0.00469 |
| 74.06 | 0.00608   | 81.4127 | 0.06669 |
| 74.08 | 0.01157   | 81.4324 | 0.03451 |
| 74.1  | 0.00269   | 81.452  | 0.05622 |

|       |           |         |         |
|-------|-----------|---------|---------|
| 74.12 | 0.02584   | 81.4717 | 0.08475 |
| 74.14 | 0.00827   | 81.4913 | 0.05824 |
| 74.16 | 0.00508   | 81.511  | 0.07769 |
| 74.18 | 0.01416   | 81.5306 | 0.05288 |
| 74.2  | 0.01396   | 81.5503 | 0.0451  |
| 74.22 | 0.00568   | 81.57   | 0.01008 |
| 74.24 | 0.00698   | 81.5896 | 0.0664  |
| 74.26 | 0.01037   | 81.6093 | 0.06769 |
| 74.28 | 0.00508   | 81.6289 | 0.06898 |
| 74.3  | 0.0438    | 81.6486 | 0.01922 |
| 74.32 | 0.02025   | 81.6682 | 0.09256 |
| 74.34 | 0.01796   | 81.7075 | 0.12351 |
| 74.36 | 0.02075   | 81.7272 | 0.03176 |
| 74.38 | 0.00379   | 81.7468 | 0.14198 |
| 74.4  | 0.01167   | 81.7665 | 0.07519 |
| 74.42 | -0.00619  | 81.7861 | 0.03167 |
| 74.44 | 0.00199   | 81.8058 | 0.11579 |
| 74.46 | 0.02724   | 81.8255 | 0.09041 |
| 74.48 | 0.01237   | 81.8451 | 0.13596 |
| 74.5  | -0.0016   | 81.8648 | 0.05272 |
| 74.52 | 0.01197   | 81.8844 | 0.03983 |
| 74.54 | 0.00848   | 81.9041 | 0.06552 |
| 74.56 | 0.00888   | 81.9237 | 0.07248 |
| 74.58 | 0.01706   | 81.9434 | 0.00796 |
| 74.6  | -2.04E-04 | 81.963  | 0.14711 |
| 74.62 | 0.01247   | 81.9827 | 0.15011 |
| 74.64 | 0.01317   | 82.0023 | 0.10998 |
| 74.66 | 0.01956   | 82.022  | 0.10957 |
| 74.68 | 0.0502    | 82.0416 | 0.13866 |
| 74.7  | 0.01048   | 82.0613 | 0.22278 |
| 74.72 | 0.01596   | 82.081  | 0.1055  |
| 74.74 | 0.01068   | 82.1006 | 0.18395 |
| 74.76 | 0.00658   | 82.1203 | 0.20454 |
| 74.78 | 0.00818   | 82.1399 | 0.17122 |
| 74.8  | 0.01816   | 82.1596 | 0.17819 |
| 74.82 | 0.00898   | 82.1792 | 0.20954 |
| 74.84 | 0.00549   | 82.1989 | 0.17793 |
| 74.86 | 0.00349   | 82.2185 | 0.20418 |
| 74.88 | 0.01138   | 82.2382 | 0.21966 |
| 74.9  | 0.01028   | 82.2578 | 0.16365 |
| 74.92 | 0.00229   | 82.2775 | 0.24891 |
| 74.94 | 0.0012    | 82.2971 | 0.19403 |
| 74.96 | 0.01866   | 82.3168 | 0.23107 |
| 74.98 | 0.01577   | 82.3365 | 0.22725 |
| 75    | 0.01138   | 82.3561 | 0.24273 |
| 75.02 | 0.01776   | 82.3758 | 0.19297 |
| 75.04 | 0.01906   | 82.3954 | 0.24418 |

|       |           |         |         |
|-------|-----------|---------|---------|
| 75.06 | 0.01497   | 82.4151 | 0.34645 |
| 75.08 | 0.00848   | 82.4347 | 0.26548 |
| 75.1  | 0.01248   | 82.4544 | 0.26224 |
| 75.12 | 0.01138   | 82.474  | 0.2709  |
| 75.14 | 0.00549   | 82.4937 | 0.29432 |
| 75.16 | 0.01128   | 82.5133 | 0.26895 |
| 75.18 | 0.01347   | 82.533  | 0.31109 |
| 75.2  | 0.01417   | 82.5526 | 0.35493 |
| 75.22 | 0.01098   | 82.5723 | 0.3131  |
| 75.24 | 0.01138   | 82.5919 | 0.36829 |
| 75.26 | 0.01058   | 82.6116 | 0.38433 |
| 75.28 | 0.01098   | 82.6313 | 0.393   |
| 75.3  | 0.0015    | 82.6509 | 0.36876 |
| 75.32 | 0.01627   | 82.6706 | 0.45969 |
| 75.34 | 0.01697   | 82.6902 | 0.51601 |
| 75.36 | 0.00869   | 82.7099 | 0.47305 |
| 75.38 | 0.00549   | 82.7295 | 0.50611 |
| 75.4  | -0.00369  | 82.7492 | 0.50854 |
| 75.42 | 0.00988   | 82.7688 | 0.47182 |
| 75.44 | 0.02076   | 82.7885 | 0.58658 |
| 75.46 | 0.00739   | 82.8081 | 0.56064 |
| 75.48 | 0.01438   | 82.8278 | 0.49782 |
| 75.5  | 0.0025    | 82.8474 | 0.52861 |
| 75.52 | 0.01098   | 82.8671 | 0.51743 |
| 75.54 | 0.00899   | 82.8868 | 0.56921 |
| 75.56 | 0.01028   | 82.9064 | 0.52852 |
| 75.58 | 0.01637   | 82.9261 | 0.45606 |
| 75.6  | -2.93E-04 | 82.9457 | 0.54188 |
| 75.62 | 0.0031    | 82.9654 | 0.49042 |
| 75.64 | 0.02146   | 82.985  | 0.48433 |
| 75.66 | 0.02276   | 83.0047 | 0.47768 |
| 75.68 | 0.00969   | 83.0243 | 0.45571 |
| 75.7  | 0.01907   | 83.044  | 0.43318 |
| 75.72 | 0.003     | 83.0636 | 0.44128 |
| 75.74 | 0.02166   | 83.0833 | 0.39321 |
| 75.76 | 0.00919   | 83.1029 | 0.33267 |
| 75.78 | 0.01498   | 83.1226 | 0.36346 |
| 75.8  | 0.02645   | 83.1423 | 0.36645 |
| 75.82 | 0.01997   | 83.1619 | 0.30761 |
| 75.84 | 0.00689   | 83.1816 | 0.34294 |
| 75.86 | 0.01448   | 83.2012 | 0.30906 |
| 75.88 | 0.02476   | 83.2209 | 0.26781 |
| 75.9  | 0.003     | 83.2405 | 0.24867 |
| 75.92 | 0.01538   | 83.2602 | 0.27436 |
| 75.94 | 0.01099   | 83.2798 | 0.23197 |
| 75.96 | 0.01228   | 83.2995 | 0.3002  |
| 75.98 | 0.02167   | 83.3191 | 0.26348 |

|       |           |         |         |
|-------|-----------|---------|---------|
| 76    | 0.00859   | 83.3388 | 0.254   |
| 76.02 | 0.01378   | 83.3584 | 0.25189 |
| 76.04 | 0.01867   | 83.3781 | 0.19304 |
| 76.06 | 0.01099   | 83.3978 | 0.16654 |
| 76.08 | 0.01648   | 83.4174 | 0.19449 |
| 76.1  | 0.01688   | 83.4371 | 0.17536 |
| 76.12 | 0.0056    | 83.4567 | 0.16701 |
| 76.14 | 0.03833   | 83.4764 | 0.12689 |
| 76.16 | 0.02167   | 83.496  | 0.1798  |
| 76.18 | -9.86E-04 | 83.5157 | 0.155   |
| 76.2  | 0.01109   | 83.5353 | 0.12622 |
| 76.22 | 0.01987   | 83.555  | 0.1417  |
| 76.24 | 0.00949   | 83.5746 | 0.13278 |
| 76.26 | 0.0042    | 83.5943 | 0.1023  |
| 76.28 | 0.02287   | 83.6139 | 0.14557 |
| 76.3  | 0.02087   | 83.6336 | 0.20473 |
| 76.32 | 0.01798   | 83.6532 | 0.15043 |
| 76.34 | 0.01838   | 83.6729 | 0.12506 |
| 76.36 | 0.01937   | 83.6926 | 0.08777 |
| 76.38 | 0.01169   | 83.7122 | 0.09701 |
| 76.4  | 0.02526   | 83.7319 | 0.14879 |
| 76.42 | 0.01518   | 83.7515 | 0.05477 |
| 76.44 | 0.01289   | 83.7712 | 0.05153 |
| 76.46 | 0.02227   | 83.7908 | 0.10444 |
| 76.48 | 0.02596   | 83.8105 | 0.07794 |
| 76.5  | 0.01708   | 83.8301 | 0.0815  |
| 76.52 | 0.00999   | 83.8498 | 0.05102 |
| 76.54 | 0.02267   | 83.8694 | 0.09486 |
| 76.56 | 0.02816   | 83.8891 | 0.06609 |
| 76.58 | 0.01538   | 83.9087 | 0.07815 |
| 76.6  | 0.0056    | 83.9284 | 0.0959  |
| 76.62 | 0.02636   | 83.9481 | 0.06315 |
| 76.64 | 0.01149   | 83.9677 | 0.07863 |
| 76.66 | 0.01459   | 83.9874 | 0.08219 |
| 76.68 | 0.01618   | 84.007  | 0.10163 |
| 76.7  | 0.02167   | 84.0267 | 0.04847 |
| 76.72 | 0.01968   | 84.0463 | 0.05883 |
| 76.74 | 0.02247   | 84.066  | 0.05616 |
| 76.76 | 0.01449   | 84.0856 | 0.11134 |
| 76.78 | 0.02147   | 84.1053 | 0.07065 |
| 76.8  | 0.03984   | 84.1249 | 0.05095 |
| 76.82 | 0.02287   | 84.1446 | 0.0982  |
| 76.84 | 0.03135   | 84.1642 | 0.09325 |
| 76.86 | 0.01469   | 84.1839 | 0.09397 |
| 76.88 | 0.04533   | 84.2036 | 0.08846 |
| 76.9  | 0.02387   | 84.2232 | 0.06309 |
| 76.92 | 0.02786   | 84.2429 | 0.09048 |

|       |         |         |         |
|-------|---------|---------|---------|
| 76.94 | 0.03395 | 84.2625 | 0.09063 |
| 76.96 | 0.03345 | 84.2822 | 0.07831 |
| 76.98 | 0.03355 | 84.3018 | 0.08811 |
| 77    | 0.03245 | 84.3215 | 0.05763 |
| 77.02 | 0.03645 | 84.3411 | 0.06176 |
| 77.04 | 0.03206 | 84.3608 | 0.02958 |
| 77.06 | 0.02257 | 84.3804 | 0.03541 |
| 77.08 | 0.01639 | 84.4001 | 0.07812 |
| 77.1  | 0.02607 | 84.4197 | 0.03913 |
| 77.12 | 0.02407 | 84.4394 | 0.05517 |
| 77.14 | 0.02357 | 84.4591 | 0.07291 |
| 77.16 | 0.05002 | 84.4787 | 0.06456 |
| 77.18 | 0.02797 | 84.4984 | 0.03352 |
| 77.2  | 0.04902 | 84.518  | 0.0802  |
| 77.22 | 0.03325 | 84.5377 | 0.08092 |
| 77.24 | 0.02737 | 84.5573 | 0.07881 |
| 77.26 | 0.05651 | 84.5966 | 0.03374 |
| 77.28 | 0.07667 | 84.6163 | 0.08722 |
| 77.3  | 0.04204 | 84.6359 | 0.05958 |
| 77.32 | 0.04843 | 84.6556 | 0.04329 |
| 77.34 | 0.05092 | 84.6752 | 0.06046 |
| 77.36 | 0.04713 | 84.6949 | 0.10487 |
| 77.38 | 0.06549 | 84.7145 | 0.05227 |
| 77.4  | 0.04523 | 84.7342 | 0.03938 |
| 77.42 | 0.05491 | 84.7539 | 0.07641 |
| 77.44 | 0.04843 | 84.7735 | 0.11458 |
| 77.46 | 0.03895 | 84.8128 | 0.08256 |
| 77.48 | 0.0597  | 84.8325 | 0.08555 |
| 77.5  | 0.05561 | 84.8521 | 0.0494  |
| 77.52 | 0.05661 | 84.8718 | 0.10175 |
| 77.54 | 0.05491 | 84.8914 | 0.05028 |
| 77.56 | 0.0595  | 84.9111 | 0.06689 |
| 77.58 | 0.05302 | 84.9307 | 0.06534 |
| 77.6  | 0.0639  | 84.9504 | 0.08252 |
| 77.62 | 0.05621 | 84.97   | 0.0702  |
| 77.64 | 0.05002 | 84.9897 | 0.11007 |
| 77.66 | 0.0609  | 85.0094 | 0.121   |
| 77.68 | 0.05502 | 85.029  | 0.05195 |
| 77.7  | 0.07996 | 85.0487 | 0.06232 |
| 77.72 | 0.04144 | 85.088  | 0.07738 |
| 77.74 | 0.05561 | 85.1076 | 0.09002 |
| 77.76 | 0.0635  | 85.1273 | 0.05557 |
| 77.78 | 0.0612  | 85.1469 | 0.09771 |
| 77.8  | 0.05412 | 85.1666 | 0.06326 |
| 77.82 | 0.06829 | 85.1862 | 0.09575 |
| 77.84 | 0.06659 | 85.2059 | 0.07038 |
| 77.86 | 0.04214 | 85.2255 | 0.0609  |

|       |         |         |         |
|-------|---------|---------|---------|
| 77.88 | 0.05063 | 85.2452 | 0.0429  |
| 77.9  | 0.05911 | 85.2649 | 0.10206 |
| 77.92 | 0.05592 | 85.2845 | 0.06591 |
| 77.94 | 0.06051 | 85.3042 | 0.08592 |
| 77.96 | 0.05073 | 85.3238 | 0.07984 |
| 77.98 | 0.04933 | 85.3435 | 0.11857 |
| 78    | 0.04464 | 85.4024 | 0.07423 |
| 78.02 | 0.03306 | 85.4221 | 0.1192  |
| 78.04 | 0.04694 | 85.4417 | 0.09383 |
| 78.06 | 0.02728 | 85.4614 | 0.07583 |
| 78.08 | 0.04953 | 85.481  | 0.01132 |
| 78.1  | 0.04993 | 85.5007 | 0.04211 |
| 78.12 | 0.05602 | 85.5204 | 0.05645 |
| 78.14 | 0.04055 | 85.5597 | 0.06414 |
| 78.16 | 0.04095 | 85.5793 | 0.09096 |
| 78.18 | 0.03416 | 85.599  | 0.0741  |
| 78.2  | 0.04175 | 85.6186 | 0.09184 |
| 78.22 | 0.03047 | 85.6383 | 0.09087 |
| 78.24 | 0.05602 | 85.6579 | 0.04564 |
| 78.26 | 0.03606 | 85.6776 | 0.07359 |
| 78.28 | 0.02927 | 85.6972 | 0.12197 |
| 78.3  | 0.04434 | 85.7169 | 0.05859 |
| 78.32 | 0.01959 | 85.7365 | 0.08144 |
| 78.34 | 0.03107 | 85.7562 | 0.0867  |
| 78.36 | 0.04225 | 85.7758 | 0.04034 |
| 78.38 | 0.02947 | 85.7955 | 0.10801 |
| 78.4  | 0.05382 | 85.8152 | 0.04292 |
| 78.42 | 0.02369 | 85.8348 | 0.12704 |
| 78.44 | 0.02947 | 85.8545 | 0.05742 |
| 78.46 | 0.02957 | 85.8741 | 0.12452 |
| 78.48 | 0.02039 | 85.8938 | 0.04242 |
| 78.5  | 0.00942 | 85.9134 | 0.07094 |
| 78.52 | 0.04185 | 85.9331 | 0.08188 |
| 78.54 | 0.0177  | 85.9527 | 0.04402 |
| 78.56 | 0.0181  | 85.992  | 0.06079 |
| 78.58 | 0.03347 | 86.0117 | 0.05641 |
| 78.6  | 0.0174  | 86.0313 | 0.07472 |
| 78.62 | 0.03157 | 86.051  | 0.05899 |
| 78.64 | 0.03107 | 86.0707 | 0.10397 |
| 78.66 | 0.03417 | 86.0903 | 0.0837  |
| 78.68 | 0.02079 | 86.11   | 0.07762 |
| 78.7  | 0.02778 | 86.1296 | 0.0392  |
| 78.72 | 0.02279 | 86.1493 | 0.09155 |
| 78.74 | 0.03247 | 86.1689 | 0.09341 |
| 78.76 | 0.03317 | 86.1886 | 0.06293 |
| 78.78 | 0.03058 | 86.2082 | 0.08068 |
| 78.8  | 0.02499 | 86.2279 | 0.02297 |

|       |         |         |         |
|-------|---------|---------|---------|
| 78.82 | 0.02539 | 86.2475 | 0.07929 |
| 78.84 | 0.04076 | 86.2672 | 0.03179 |
| 78.86 | 0.01331 | 86.2868 | 0.06996 |
| 78.88 | 0.03018 | 86.3065 | 0.05991 |
| 78.9  | 0.02938 | 86.3262 | 0.08162 |
| 78.92 | 0.04026 | 86.3458 | 0.06986 |
| 78.94 | 0.017   | 86.3655 | 0.12508 |
| 78.96 | 0.02399 | 86.3851 | 0.06741 |
| 78.98 | 0.03008 | 86.4048 | 0.1056  |
| 79    | 0.02239 | 86.4244 | 0.10749 |
| 79.02 | 0.02669 | 86.4441 | 0.10655 |
| 79.04 | 0.02529 | 86.4637 | 0.11979 |
| 79.06 | 0.03587 | 86.4834 | 0.10352 |
| 79.08 | 0.01741 | 86.503  | 0.09917 |
| 79.1  | 0.04744 | 86.5227 | 0.10674 |
| 79.12 | 0.0188  | 86.5423 | 0.07856 |
| 79.14 | 0.03297 | 86.562  | 0.07024 |
| 79.16 | 0.0223  | 86.5817 | 0.09142 |
| 79.18 | 0.03198 | 86.6013 | 0.11317 |
| 79.2  | 0.01531 | 86.621  | 0.10144 |
| 79.22 | 0.01661 | 86.6406 | 0.09823 |
| 79.24 | 0.04515 | 86.6603 | 0.08253 |
| 79.26 | 0.03058 | 86.6799 | 0.14569 |
| 79.28 | 0.02649 | 86.6996 | 0.1005  |
| 79.3  | 0.02809 | 86.7192 | 0.1177  |
| 79.32 | 0.0195  | 86.7389 | 0.05833 |
| 79.34 | 0.019   | 86.7585 | 0.14418 |
| 79.36 | 0.02719 | 86.7782 | 0.16025 |
| 79.38 | 0.01741 | 86.7978 | 0.10541 |
| 79.4  | 0.03278 | 86.8175 | 0.11865 |
| 79.42 | 0.03198 | 86.8371 | 0.09785 |
| 79.44 | 0.04256 | 86.8568 | 0.13264 |
| 79.46 | 0.03098 | 86.8765 | 0.12772 |
| 79.48 | 0.03048 | 86.8961 | 0.10125 |
| 79.5  | 0.02519 | 86.9158 | 0.08896 |
| 79.52 | 0.02739 | 86.9354 | 0.12375 |
| 79.54 | 0.03707 | 86.9551 | 0.14493 |
| 79.56 | 0.01771 | 86.9747 | 0.123   |
| 79.58 | 0.0223  | 86.9944 | 0.15212 |
| 79.6  | 0.01522 | 87.014  | 0.12167 |
| 79.62 | 0.01981 | 87.0337 | 0.09804 |
| 79.64 | 0.01542 | 87.0533 | 0.12659 |
| 79.66 | 0.023   | 87.073  | 0.15628 |
| 79.68 | 0.03478 | 87.0926 | 0.12016 |
| 79.7  | 0.01841 | 87.1123 | 0.12545 |
| 79.72 | 0.02809 | 87.132  | 0.15457 |
| 79.74 | 0.03298 | 87.1516 | 0.15647 |

|       |         |         |         |
|-------|---------|---------|---------|
| 79.76 | 0.0232  | 87.1713 | 0.1368  |
| 79.78 | 0.03288 | 87.1909 | 0.19088 |
| 79.8  | 0.03118 | 87.2106 | 0.1298  |
| 79.82 | 0.03128 | 87.2302 | 0.20828 |
| 79.84 | 0.0254  | 87.2499 | 0.18521 |
| 79.86 | 0.02969 | 87.2695 | 0.20923 |
| 79.88 | 0.01751 | 87.2892 | 0.15155 |
| 79.9  | 0.023   | 87.3088 | 0.25045 |
| 79.92 | 0.0219  | 87.3285 | 0.21603 |
| 79.94 | 0.02739 | 87.3481 | 0.23267 |
| 79.96 | 0.01791 | 87.3678 | 0.21868 |
| 79.98 | 0.02819 | 87.3875 | 0.20695 |
| 80    | 0.03069 | 87.4071 | 0.14531 |
| 80.02 | 0.02181 | 87.4268 | 0.18237 |
| 80.04 | 0.01742 | 87.4464 | 0.17292 |
| 80.06 | 0.0253  | 87.4661 | 0.22303 |
| 80.08 | 0.01911 | 87.4857 | 0.18691 |
| 80.1  | 0.01951 | 87.5054 | 0.20355 |
| 80.12 | 0.0268  | 87.525  | 0.20714 |
| 80.14 | 0.03558 | 87.5447 | 0.16592 |
| 80.16 | 0.02041 | 87.5643 | 0.19107 |
| 80.18 | 0.02261 | 87.584  | 0.19977 |
| 80.2  | 0.03528 | 87.6036 | 0.16308 |
| 80.22 | 0.01233 | 87.6233 | 0.15363 |
| 80.24 | 0.0283  | 87.643  | 0.16459 |
| 80.26 | 0.03109 | 87.6626 | 0.23229 |
| 80.28 | 0.03059 | 87.6823 | 0.19107 |
| 80.3  | 0.0283  | 87.7019 | 0.15835 |
| 80.32 | 0.01822 | 87.7216 | 0.14549 |
| 80.34 | 0.0258  | 87.7412 | 0.24099 |
| 80.36 | 0.01333 | 87.7609 | 0.17821 |
| 80.38 | 0.03019 | 87.7805 | 0.13245 |
| 80.4  | 0.03179 | 87.8002 | 0.20185 |
| 80.42 | 0.0247  | 87.8198 | 0.14133 |
| 80.44 | 0.03109 | 87.8395 | 0.13698 |
| 80.46 | 0.03059 | 87.8591 | 0.15079 |
| 80.48 | 0.02381 | 87.8788 | 0.13906 |
| 80.5  | 0.03738 | 87.8984 | 0.14606 |
| 80.52 | 0.03119 | 87.9181 | 0.1366  |
| 80.54 | 0.05015 | 87.9378 | 0.09765 |
| 80.56 | 0.03049 | 87.9574 | 0.04054 |
| 80.58 | 0.0264  | 87.9771 | 0.08952 |
| 80.6  | 0.03159 | 87.9967 | 0.07949 |
| 80.62 | 0.04127 | 88.0164 | 0.10351 |
| 80.64 | 0.03389 | 88.036  | 0.10767 |
| 80.66 | 0.03429 | 88.0557 | 0.06531 |
| 80.68 | 0.0272  | 88.0753 | 0.07912 |



|       |         |         |         |
|-------|---------|---------|---------|
| 80.7  | 0.05065 | 88.095  | 0.11788 |
| 80.72 | 0.0265  | 88.1146 | 0.15324 |
| 80.74 | 0.02331 | 88.1343 | 0.06437 |
| 80.76 | 0.03928 | 88.1539 | 0.05151 |
| 80.78 | 0.03429 | 88.1736 | 0.09254 |
| 80.8  | 0.04577 | 88.1933 | 0.07174 |
| 80.82 | 0.03718 | 88.2129 | 0.10086 |
| 80.84 | 0.03219 | 88.2326 | 0.07098 |
| 80.86 | 0.03888 | 88.2522 | 0.0689  |
| 80.88 | 0.04078 | 88.2719 | 0.03562 |
| 80.9  | 0.04597 | 88.2915 | 0.05907 |
| 80.92 | 0.0296  | 88.3112 | 0.07401 |
| 80.94 | 0.0309  | 88.3308 | 0.08554 |
| 80.96 | 0.0313  | 88.3505 | 0.04545 |
| 80.98 | 0.03409 | 88.3701 | 0.036   |
| 81    | 0.03988 | 88.3898 | 0.07476 |
| 81.02 | 0.02621 | 88.4094 | 0.05396 |
| 81.04 | 0.0299  | 88.4291 | 0.05245 |
| 81.06 | 0.04018 | 88.4488 | 0.07022 |
| 81.08 | 0.05495 | 88.4684 | 0.00234 |
| 81.1  | 0.0308  | 88.4881 | 0.04337 |
| 81.12 | 0.04707 | 88.5077 | 0.06682 |
| 81.14 | 0.03579 | 88.5274 | 0.05283 |
| 81.16 | 0.04786 | 88.547  | 0.11258 |
| 81.18 | 0.04946 | 88.5667 | 0.04186 |
| 81.2  | 0.03489 | 88.5863 | 0.03581 |
| 81.22 | 0.0323  | 88.606  | 0.0655  |
| 81.24 | 0.05216 | 88.6256 | 0.0481  |
| 81.26 | 0.05525 | 88.6453 | 0.02673 |
| 81.28 | 0.05266 | 88.6649 | 0.04677 |
| 81.3  | 0.05695 | 88.6846 | 0.09065 |
| 81.32 | 0.04777 | 88.7043 | 0.02616 |
| 81.34 | 0.05625 | 88.7239 | 0.02805 |
| 81.36 | 0.04737 | 88.7436 | 0.00725 |
| 81.38 | 0.05735 | 88.7632 | 0.06304 |
| 81.4  | 0.06134 | 88.7829 | 0.05869 |
| 81.42 | 0.04497 | 88.8025 | 0.01916 |
| 81.44 | 0.05795 | 88.8222 | 0.00687 |
| 81.46 | 0.04996 | 88.8418 | 0.05869 |
| 81.48 | 0.06054 | 88.8615 | 0.07136 |
| 81.5  | 0.04358 | 88.8811 | 0.07268 |
| 81.52 | 0.06374 | 88.9008 | 0.06039 |
| 81.54 | 0.06264 | 88.9204 | 0.0254  |
| 81.56 | 0.07322 | 88.9401 | 0.07438 |
| 81.58 | 0.06404 | 88.9597 | 0.01557 |
| 81.6  | 0.07761 | 88.9794 | 0.02881 |
| 81.62 | 0.06454 | 88.9991 | 0.02275 |

|       |         |         |         |
|-------|---------|---------|---------|
| 81.64 | 0.0817  | 89.0187 | 0.06719 |
| 81.66 | 0.07581 | 89.0384 | 0.08043 |
| 81.68 | 0.07561 | 89.058  | 0.02502 |
| 81.7  | 0.07482 | 89.0777 | 0.09669 |
| 81.72 | 0.07222 | 89.0973 | 0.03845 |
| 81.74 | 0.07981 | 89.117  | 0.00744 |
| 81.76 | 0.07212 | 89.1366 | 0.02067 |
| 81.78 | 0.07402 | 89.1563 | 0.06455 |
| 81.8  | 0.07951 | 89.1759 | 0.07211 |
| 81.82 | 0.08829 | 89.1956 | 0.02918 |
| 81.84 | 0.06893 | 89.2152 | 0.00214 |
| 81.86 | 0.08011 | 89.2349 | 0.05452 |
| 81.88 | 0.07961 | 89.2546 | 0.04393 |
| 81.9  | 0.0851  | 89.2742 | 0.07249 |
| 81.92 | 0.0834  | 89.2939 | 0.04374 |
| 81.94 | 0.07003 | 89.3135 | 0.07173 |
| 81.96 | 0.07582 | 89.3332 | 0.04299 |
| 81.98 | 0.07292 | 89.3528 | 0.01311 |
| 82    | 0.07242 | 89.3725 | 0.04847 |
| 82.02 | 0.09947 | 89.3921 | 0.05887 |
| 82.04 | 0.07083 | 89.4118 | 0.06133 |
| 82.06 | 0.0832  | 89.4314 | 0.02351 |
| 82.08 | 0.07133 | 89.4511 | 0.0827  |
| 82.1  | 0.07083 | 89.4707 | 0.05622 |
| 82.12 | 0.06284 | 89.4904 | 0.05755 |
| 82.14 | 0.07731 | 89.5101 | 0.06454 |
| 82.16 | 0.06454 | 89.5297 | 0.10785 |
| 82.18 | 0.0865  | 89.5494 | 0.04847 |
| 82.2  | 0.06923 | 89.569  | 0.07759 |
| 82.22 | 0.07652 | 89.5887 | 0.02842 |
| 82.24 | 0.07632 | 89.6083 | 0.06322 |
| 82.26 | 0.06504 | 89.628  | 0.05376 |
| 82.28 | 0.08251 | 89.6476 | 0.04544 |
| 82.3  | 0.05356 | 89.6673 | 0.07967 |
| 82.32 | 0.06115 | 89.6869 | 0.06057 |
| 82.34 | 0.05885 | 89.7066 | 0.09366 |
| 82.36 | 0.06285 | 89.7262 | 0.04109 |
| 82.38 | 0.05606 | 89.7459 | 0.05887 |
| 82.4  | 0.05017 | 89.7656 | 0.08118 |
| 82.42 | 0.06015 | 89.7852 | 0.08137 |
| 82.44 | 0.06265 | 89.8049 | 0.05433 |
| 82.46 | 0.04419 | 89.8245 | 0.01537 |
| 82.48 | 0.07812 | 89.8442 | 0.0218  |
| 82.5  | 0.05606 | 89.8638 | 0.07816 |
| 82.52 | 0.05466 | 89.8835 | 0.03523 |
| 82.54 | 0.04967 | 89.9031 | 0.08818 |
| 82.56 | 0.04558 | 89.9228 | 0.03334 |

|       |         |    |         |         |
|-------|---------|----|---------|---------|
| 82.58 | 0.05197 |    | 89.9424 | 0.06983 |
| 82.6  | 0.05387 |    | 89.9621 | 0.08534 |
| 82.62 | 0.04469 |    | 89.9817 | 0.01008 |
| 82.64 | 0.04    |    | 90.0014 | 0.01027 |
| 82.66 | 0.04279 | -- | --      |         |
| 82.68 | 0.04229 | -- | --      |         |
| 82.7  | 0.0373  | -- | --      |         |
| 82.72 | 0.03171 | -- | --      |         |
| 82.74 | 0.02972 | -- | --      |         |
| 82.76 | 0.0391  | -- | --      |         |
| 82.78 | 0.04129 | -- | --      |         |
| 82.8  | 0.03511 | -- | --      |         |
| 82.82 | 0.03281 | -- | --      |         |
| 82.84 | 0.02782 | -- | --      |         |
| 82.86 | 0.0372  | -- | --      |         |
| 82.88 | 0.0391  | -- | --      |         |
| 82.9  | 0.0404  | -- | --      |         |
| 82.92 | 0.04379 | -- | --      |         |
| 82.94 | 0.02623 | -- | --      |         |
| 82.96 | 0.03291 | -- | --      |         |
| 82.98 | 0.02643 | -- | --      |         |
| 83    | 0.03641 | -- | --      |         |
| 83.02 | 0.0377  | -- | --      |         |
| 83.04 | 0.02613 | -- | --      |         |
| 83.06 | 0.02443 | -- | --      |         |
| 83.08 | 0.03112 | -- | --      |         |
| 83.1  | 0.02104 | -- | --      |         |
| 83.12 | 0.02862 | -- | --      |         |
| 83.14 | 0.03681 | -- | --      |         |
| 83.16 | 0.01685 | -- | --      |         |
| 83.18 | 0.01934 | -- | --      |         |
| 83.2  | 0.01465 | -- | --      |         |
| 83.22 | 0.02882 | -- | --      |         |
| 83.24 | 0.03521 | -- | --      |         |
| 83.26 | 0.03501 | -- | --      |         |
| 83.28 | 0.03032 | -- | --      |         |
| 83.3  | 0.0385  | -- | --      |         |
| 83.32 | 0.03142 | -- | --      |         |
| 83.34 | 0.02823 | -- | --      |         |
| 83.36 | 0.02623 | -- | --      |         |
| 83.38 | 0.02244 | -- | --      |         |
| 83.4  | 0.02134 | -- | --      |         |
| 83.42 | 0.02773 | -- | --      |         |
| 83.44 | 0.00418 | -- | --      |         |
| 83.46 | 0.01715 | -- | --      |         |
| 83.48 | 0.01725 | -- | --      |         |
| 83.5  | 0.02903 | -- | --      |         |

|       |         |    |    |
|-------|---------|----|----|
| 83.52 | 0.02374 | -- | -- |
| 83.54 | 0.02084 | -- | -- |
| 83.56 | 0.01016 | -- | -- |
| 83.58 | 0.00907 | -- | -- |
| 83.6  | 0.02533 | -- | -- |
| 83.62 | 0.02963 | -- | -- |
| 83.64 | 0.01296 | -- | -- |
| 83.66 | 0.01426 | -- | -- |
| 83.68 | 0.02454 | -- | -- |
| 83.7  | 0.02194 | -- | -- |
| 83.72 | 0.02983 | -- | -- |
| 83.74 | 0.02873 | -- | -- |
| 83.76 | 0.02703 | -- | -- |
| 83.78 | 0.02174 | -- | -- |
| 83.8  | 0.02633 | -- | -- |
| 83.82 | 0.02224 | -- | -- |
| 83.84 | 0.02713 | -- | -- |
| 83.86 | 0.01975 | -- | -- |
| 83.88 | 0.01895 | -- | -- |
| 83.9  | 0.01725 | -- | -- |
| 83.92 | 0.02065 | -- | -- |
| 83.94 | 0.03362 | -- | -- |
| 83.96 | 0.03252 | -- | -- |
| 83.98 | 0.02185 | -- | -- |
| 84    | 0.02404 | -- | -- |
| 84.02 | 0.01127 | -- | -- |
| 84.04 | 0.01945 | -- | -- |
| 84.06 | 0.02404 | -- | -- |
| 84.08 | 0.02025 | -- | -- |
| 84.1  | 0.01556 | -- | -- |
| 84.12 | 0.02284 | -- | -- |
| 84.14 | 0.01366 | -- | -- |
| 84.16 | 0.01406 | -- | -- |
| 84.18 | 0.00907 | -- | -- |
| 84.2  | 0.02384 | -- | -- |
| 84.22 | 0.02245 | -- | -- |
| 84.24 | 0.01746 | -- | -- |
| 84.26 | 0.01247 | -- | -- |
| 84.28 | 0.02035 | -- | -- |
| 84.3  | 0.01985 | -- | -- |
| 84.32 | 0.01786 | -- | -- |
| 84.34 | 0.02574 | -- | -- |
| 84.36 | 0.01117 | -- | -- |
| 84.38 | 0.01846 | -- | -- |
| 84.4  | 0.02065 | -- | -- |
| 84.42 | 0.02075 | -- | -- |
| 84.44 | 0.02265 | -- | -- |

|       |         |    |    |
|-------|---------|----|----|
| 84.46 | 0.01347 | -- | -- |
| 84.48 | 0.01836 | -- | -- |
| 84.5  | 0.03612 | -- | -- |
| 84.52 | 0.01856 | -- | -- |
| 84.54 | 0.01596 | -- | -- |
| 84.56 | 0.02265 | -- | -- |
| 84.58 | 0.02514 | -- | -- |
| 84.6  | 0.03333 | -- | -- |
| 84.62 | 0.02534 | -- | -- |
| 84.64 | 0.01856 | -- | -- |
| 84.66 | 0.01147 | -- | -- |
| 84.68 | 0.02265 | -- | -- |
| 84.7  | 0.02754 | -- | -- |
| 84.72 | 0.02764 | -- | -- |
| 84.74 | 0.01247 | -- | -- |
| 84.76 | 0.01407 | -- | -- |
| 84.78 | 0.01926 | -- | -- |
| 84.8  | 0.01577 | -- | -- |
| 84.82 | 0.01646 | -- | -- |
| 84.84 | 0.02345 | -- | -- |
| 84.86 | 0.02026 | -- | -- |
| 84.88 | 0.02605 | -- | -- |
| 84.9  | 0.01237 | -- | -- |
| 84.92 | 0.02445 | -- | -- |
| 84.94 | 0.02365 | -- | -- |
| 84.96 | 0.01267 | -- | -- |
| 84.98 | 0.01936 | -- | -- |
| 85    | -0.0021 | -- | -- |
| 85.02 | 0.00998 | -- | -- |
| 85.04 | 0.00828 | -- | -- |
| 85.06 | 0.01407 | -- | -- |
| 85.08 | 0.02375 | -- | -- |
| 85.1  | 0.02715 | -- | -- |
| 85.12 | 0.02305 | -- | -- |
| 85.14 | 0.01477 | -- | -- |
| 85.16 | 0.02745 | -- | -- |
| 85.18 | 0.01108 | -- | -- |
| 85.2  | 0.02076 | -- | -- |
| 85.22 | 0.01757 | -- | -- |
| 85.24 | 0.01797 | -- | -- |
| 85.26 | 0.01298 | -- | -- |
| 85.28 | 0.01936 | -- | -- |
| 85.3  | 0.03054 | -- | -- |
| 85.32 | 0.02555 | -- | -- |
| 85.34 | 0.02835 | -- | -- |
| 85.36 | 0.02096 | -- | -- |
| 85.38 | 0.02525 | -- | -- |

|       |         |    |    |
|-------|---------|----|----|
| 85.4  | 0.02595 | -- | -- |
| 85.42 | 0.02815 | -- | -- |
| 85.44 | 0.03364 | -- | -- |
| 85.46 | 0.03284 | -- | -- |
| 85.48 | 0.03294 | -- | -- |
| 85.5  | 0.02974 | -- | -- |
| 85.52 | 0.03463 | -- | -- |
| 85.54 | 0.03503 | -- | -- |
| 85.56 | 0.03424 | -- | -- |
| 85.58 | 0.03793 | -- | -- |
| 85.6  | 0.02935 | -- | -- |
| 85.62 | 0.04142 | -- | -- |
| 85.64 | 0.02805 | -- | -- |
| 85.66 | 0.02965 | -- | -- |
| 85.68 | 0.03484 | -- | -- |
| 85.7  | 0.04661 | -- | -- |
| 85.72 | 0.03264 | -- | -- |
| 85.74 | 0.02346 | -- | -- |
| 85.76 | 0.03823 | -- | -- |
| 85.78 | 0.03204 | -- | -- |
| 85.8  | 0.03753 | -- | -- |
| 85.82 | 0.04661 | -- | -- |
| 85.84 | 0.03713 | -- | -- |
| 85.86 | 0.04113 | -- | -- |
| 85.88 | 0.04602 | -- | -- |
| 85.9  | 0.04731 | -- | -- |
| 85.92 | 0.03424 | -- | -- |
| 85.94 | 0.04691 | -- | -- |
| 85.96 | 0.03264 | -- | -- |
| 85.98 | 0.05879 | -- | -- |
| 86    | 0.0562  | -- | -- |
| 86.02 | 0.05091 | -- | -- |
| 86.04 | 0.05729 | -- | -- |
| 86.06 | 0.06308 | -- | -- |
| 86.08 | 0.07037 | -- | -- |
| 86.1  | 0.0525  | -- | -- |
| 86.12 | 0.0529  | -- | -- |
| 86.14 | 0.04911 | -- | -- |
| 86.16 | 0.054   | -- | -- |
| 86.18 | 0.06099 | -- | -- |
| 86.2  | 0.056   | -- | -- |
| 86.22 | 0.04981 | -- | -- |
| 86.24 | 0.06787 | -- | -- |
| 86.26 | 0.0569  | -- | -- |
| 86.28 | 0.06897 | -- | -- |
| 86.3  | 0.06279 | -- | -- |
| 86.32 | 0.06259 | -- | -- |

|       |         |    |    |
|-------|---------|----|----|
| 86.34 | 0.06568 | -- | -- |
| 86.36 | 0.07806 | -- | -- |
| 86.38 | 0.06887 | -- | -- |
| 86.4  | 0.08095 | -- | -- |
| 86.44 | 0.07157 | -- | -- |
| 86.46 | 0.08814 | -- | -- |
| 86.48 | 0.07925 | -- | -- |
| 86.5  | 0.07367 | -- | -- |
| 86.52 | 0.08395 | -- | -- |
| 86.54 | 0.07417 | -- | -- |
| 86.56 | 0.08534 | -- | -- |
| 86.58 | 0.07287 | -- | -- |
| 86.6  | 0.06997 | -- | -- |
| 86.62 | 0.07367 | -- | -- |
| 86.64 | 0.08185 | -- | -- |
| 86.66 | 0.07177 | -- | -- |
| 86.68 | 0.06618 | -- | -- |
| 86.7  | 0.07347 | -- | -- |
| 86.72 | 0.0586  | -- | -- |
| 86.74 | 0.07636 | -- | -- |
| 86.76 | 0.07736 | -- | -- |
| 86.78 | 0.06578 | -- | -- |
| 86.8  | 0.059   | -- | -- |
| 86.82 | 0.06389 | -- | -- |
| 86.84 | 0.06399 | -- | -- |
| 86.86 | 0.06169 | -- | -- |
| 86.88 | 0.07137 | -- | -- |
| 86.9  | 0.0595  | -- | -- |
| 86.92 | 0.0581  | -- | -- |
| 86.94 | 0.05251 | -- | -- |
| 86.96 | 0.05411 | -- | -- |
| 86.98 | 0.05601 | -- | -- |
| 87    | 0.04084 | -- | -- |
| 87.02 | 0.04483 | -- | -- |
| 87.04 | 0.03235 | -- | -- |
| 87.06 | 0.04084 | -- | -- |
| 87.08 | 0.04333 | -- | -- |
| 87.1  | 0.03685 | -- | -- |
| 87.12 | 0.04503 | -- | -- |
| 87.14 | 0.04483 | -- | -- |
| 87.16 | 0.03625 | -- | -- |
| 87.18 | 0.02587 | -- | -- |
| 87.2  | 0.04004 | -- | -- |
| 87.22 | 0.04403 | -- | -- |
| 87.24 | 0.03186 | -- | -- |
| 87.26 | 0.03974 | -- | -- |
| 87.28 | 0.03894 | -- | -- |

|          |         |    |    |
|----------|---------|----|----|
| 87.3     | 0.02557 | -- | -- |
| 87.32    | 0.01938 | -- | -- |
| 87.34    | 0.02607 | -- | -- |
| 87.36    | 0.01869 | -- | -- |
| 87.38    | 0.03735 | -- | -- |
| 87.4     | 0.02457 | -- | -- |
| 87.42    | 0.02887 | -- | -- |
| 87.44    | 0.01759 | -- | -- |
| 87.46    | 0.02038 | -- | -- |
| 87.48    | 0.02078 | -- | -- |
| 87.5     | 0.04064 | -- | -- |
| 87.52    | 0.02607 | -- | -- |
| 87.54    | 0.02438 | -- | -- |
| 87.56    | 0.03346 | -- | -- |
| 87.58    | 0.02368 | -- | -- |
| 87.6     | 0.01749 | -- | -- |
| 87.62    | 0.03286 | -- | -- |
| 87.64    | 0.02817 | -- | -- |
| 87.66    | 0.02737 | -- | -- |
| 87.68    | 0.02298 | -- | -- |
| 87.7     | 0.02967 | -- | -- |
| 87.72    | 0.01989 | -- | -- |
| 87.74    | 0.02717 | -- | -- |
| 87.76    | 0.01739 | -- | -- |
| 87.78    | 0.02677 | -- | -- |
| 87.8     | 0.01909 | -- | -- |
| 87.82    | 0.02757 | -- | -- |
| 87.84    | 0.02318 | -- | -- |
| 87.86    | 0.02807 | -- | -- |
| 87.88 -- |         | -- | -- |
| 87.9     | 0.02378 | -- | -- |
| 87.92    | 0.02927 | -- | -- |
| 87.94    | 0.02907 | -- | -- |
| 87.96    | 0.02228 | -- | -- |
| 87.98    | 0.02418 | -- | -- |
| 88       | 0.03027 | -- | -- |
| 88.02    | 0.01929 | -- | -- |
| 88.04    | 0.02059 | -- | -- |
| 88.06    | 0.0165  | -- | -- |
| 88.08    | 0.0136  | -- | -- |
| 88.1     | 0.02269 | -- | -- |
| 88.12    | 0.0177  | -- | -- |
| 88.14    | 0.02648 | -- | -- |
| 88.16    | 0.02957 | -- | -- |
| 88.18    | 0.02129 | -- | -- |
| 88.2     | 0.0172  | -- | -- |
| 88.22    | 0.02299 | -- | -- |



|       |         |    |    |
|-------|---------|----|----|
| 88.24 | 0.03835 | -- | -- |
| 88.26 | 0.02917 | -- | -- |
| 88.28 | --      | -- | -- |
| 88.3  | 0.0153  | -- | -- |
| 88.32 | 0.02289 | -- | -- |
| 88.34 | 0.02239 | -- | -- |
| 88.36 | 0.03117 | -- | -- |
| 88.38 | 0.03067 | -- | -- |
| 88.4  | 0.02538 | -- | -- |
| 88.42 | 0.02279 | -- | -- |
| 88.44 | 0.02528 | -- | -- |
| 88.46 | 0.02957 | -- | -- |
| 88.48 | 0.02399 | -- | -- |
| 88.5  | 0.02079 | -- | -- |
| 88.52 | 0.0152  | -- | -- |
| 88.54 | 0.00842 | -- | -- |
| 88.56 | 0.03337 | -- | -- |
| 88.58 | 0.02359 | -- | -- |
| 88.6  | 0.02369 | -- | -- |
| 88.62 | 0.02648 | -- | -- |
| 88.64 | 0.01461 | -- | -- |
| 88.66 | 0.0189  | -- | -- |
| 88.68 | 0.02439 | -- | -- |
| 88.7  | 0.0167  | -- | -- |
| 88.72 | 0.01501 | -- | -- |
| 88.74 | 0.0175  | -- | -- |
| 88.76 | 0.02179 | -- | -- |
| 88.78 | 0.02878 | -- | -- |
| 88.8  | 0.01002 | -- | -- |
| 88.82 | 0.0179  | -- | -- |
| 88.84 | 0.0213  | -- | -- |
| 88.86 | 0.02918 | -- | -- |
| 88.88 | 0.02569 | -- | -- |
| 88.9  | 0.0207  | -- | -- |
| 88.92 | 0.0172  | -- | -- |
| 88.94 | 0.02569 | -- | -- |
| 88.96 | 0.02818 | -- | -- |
| 88.98 | 0.03637 | -- | -- |
| 89    | 0.01611 | -- | -- |
| 89.02 | 0.02399 | -- | -- |
| 89.04 | 0.03038 | -- | -- |
| 89.06 | 0.0209  | -- | -- |
| 89.08 | 0.02429 | -- | -- |
| 89.1  | 0.02469 | -- | -- |
| 89.12 | 0.02778 | -- | -- |
| 89.14 | 0.0219  | -- | -- |
| 89.16 | 0.0208  | -- | -- |

|       |         |    |    |
|-------|---------|----|----|
| 89.18 | 0.0212  | -- | -- |
| 89.2  | --      | -- | -- |
| 89.22 | 0.02799 | -- | -- |
| 89.24 | 0.03288 | -- | -- |
| 89.26 | 0.0231  | -- | -- |
| 89.28 | 0.0196  | -- | -- |
| 89.3  | 0.03288 | -- | -- |
| 89.32 | 0.02878 | -- | -- |
| 89.34 | 0.02589 | -- | -- |
| 89.36 | 0.02419 | -- | -- |
| 89.38 | 0.03298 | -- | -- |
| 89.4  | 0.0214  | -- | -- |
| 89.42 | 0.03018 | -- | -- |
| 89.44 | 0.00992 | -- | -- |
| 89.46 | 0.0223  | -- | -- |
| 89.48 | 0.01312 | -- | -- |
| 89.5  | 0.00963 | -- | -- |
| 89.52 | 0.0235  | -- | -- |
| 89.54 | 0.0224  | -- | -- |
| 89.56 | 0.02579 | -- | -- |
| 89.58 | 0.03278 | -- | -- |
| 89.6  | 0.02989 | -- | -- |
| 89.62 | 0.01202 | -- | -- |
| 89.64 | 0.03428 | -- | -- |
| 89.66 | 0.02899 | -- | -- |
| 89.68 | 0.03118 | -- | -- |
| 89.7  | 0.0229  | -- | -- |
| 89.72 | 0.0215  | -- | -- |
| 89.74 | 0.0219  | -- | -- |
| 89.76 | 0.02949 | -- | -- |
| 89.78 | 0.02659 | -- | -- |
| 89.8  | 0.0258  | -- | -- |
| 89.82 | 0.01482 | -- | -- |
| 89.84 | 0.02869 | -- | -- |
| 89.86 | 0.0252  | -- | -- |
| 89.88 | 0.0232  | -- | -- |
| 89.9  | 0.01522 | -- | -- |
| 89.92 | 0.0228  | -- | -- |
| 89.94 | 0.03218 | -- | -- |
| 89.96 | 0.02001 | -- | -- |
| 89.98 | 0.01831 | -- | -- |
| 90    | 0.02141 | -- | -- |
| 90.02 | 0.02869 | -- | -- |

**Figure 4**

| T_heating | M         | T_cooling | M        |
|-----------|-----------|-----------|----------|
| 349.84503 | 229.00949 | 986.30396 | 47.05235 |
| 350.74423 | 229.22806 | 980.47949 | 46.60285 |
| 351.50922 | 228.85321 | 982.1543  | 46.4632  |
| 352.17053 | 228.84484 | 820.16644 | 59.5712  |
| 352.90082 | 229.36367 | 819.5744  | 59.55414 |
| 353.53351 | 229.03628 | 819.28912 | 59.85165 |
| 354.24551 | 229.22996 | 818.8291  | 59.96317 |
| 354.90668 | 228.85013 | 818.60669 | 59.97853 |
| 355.60989 | 229.23161 | 818.20288 | 59.97772 |
| 356.31046 | 229.47633 | 817.8974  | 59.99873 |
| 356.97754 | 229.49496 | 817.50299 | 60.08632 |
| 357.62982 | 229.36809 | 817.20905 | 60.30019 |
| 358.3414  | 229.10669 | 816.8725  | 60.13672 |
| 359.08636 | 229.4207  | 816.49878 | 60.34993 |
| 359.72589 | 229.35852 | 816.14899 | 60.43751 |
| 360.46399 | 229.5572  | 815.89764 | 60.61147 |
| 361.11578 | 229.64896 | 815.47784 | 60.58489 |
| 361.81512 | 229.56781 | 815.17761 | 60.55869 |
| 362.43103 | 229.72667 | 814.78741 | 60.64442 |
| 363.12827 | 229.76718 | 814.53204 | 60.84841 |
| 363.86887 | 229.80616 | 814.17554 | 60.77442 |
| 364.5488  | 229.87007 | 813.95068 | 60.82855 |
| 365.30539 | 229.68016 | 813.50568 | 61.04975 |
| 365.93332 | 229.97007 | 813.08929 | 60.9582  |
| 366.59628 | 230.01024 | 812.7655  | 61.06598 |
| 367.32748 | 229.77043 | 812.50824 | 61.08773 |
| 368.05649 | 230.11585 | 812.34021 | 61.16573 |
| 368.68542 | 230.05268 | 811.92407 | 61.1913  |
| 369.39978 | 229.79502 | 811.7912  | 61.26067 |
| 370.05688 | 230.03624 | 811.14923 | 61.44343 |
| 370.76471 | 230.14837 | 810.74976 | 61.514   |
| 371.43405 | 230.56998 | 810.4444  | 61.59377 |
| 372.16479 | 230.35877 | 810.05334 | 61.66974 |
| 372.7926  | 230.27336 | 810.00336 | 61.58876 |
| 373.53928 | 230.40973 | 809.5885  | 61.46004 |
| 374.25452 | 230.49903 | 809.28052 | 61.74754 |
| 374.92175 | 230.43218 | 808.76184 | 61.76354 |
| 375.57513 | 229.62303 | 808.54822 | 61.92069 |
| 376.52899 | 230.50928 | 808.09564 | 61.94634 |
| 377.2543  | 230.66789 | 807.66541 | 61.9843  |
| 377.92389 | 230.6175  | 807.45361 | 61.99004 |
| 378.59982 | 230.7238  | 807.20282 | 61.84864 |
| 379.27472 | 231.02495 | 806.87073 | 62.16552 |
| 379.98468 | 230.86793 | 806.51001 | 62.23747 |
| 380.65747 | 230.85244 | 806.12091 | 62.40879 |

|           |           |           |          |
|-----------|-----------|-----------|----------|
| 381.30344 | 230.79979 | 805.82416 | 62.25624 |
| 381.99747 | 230.97763 | 805.43903 | 62.29689 |
| 382.64484 | 230.8801  | 804.94208 | 62.41314 |
| 383.40506 | 231.45084 | 804.39923 | 62.45087 |
| 384.05484 | 231.23657 | 804.41229 | 62.41008 |
| 384.80698 | 231.19042 | 804.11517 | 62.69359 |
| 385.47961 | 231.20435 | 803.8313  | 62.67735 |
| 386.16013 | 231.08595 | 803.35077 | 62.62505 |
| 386.81677 | 231.34328 | 803.09235 | 62.5175  |
| 387.54321 | 231.21468 | 802.71527 | 62.79118 |
| 388.21967 | 231.26471 | 802.28796 | 62.84746 |
| 388.96634 | 231.31155 | 802.03699 | 62.97673 |
| 389.67572 | 232.34149 | 801.64984 | 62.89106 |
| 390.31036 | 231.72218 | 801.41071 | 63.00372 |
| 390.98965 | 231.45827 | 801.00946 | 63.15875 |
| 391.67734 | 231.5474  | 800.75043 | 62.94665 |
| 392.35657 | 231.52551 | 800.28333 | 63.1919  |
| 393.01434 | 231.63673 | 799.98389 | 63.27232 |
| 393.75836 | 231.66772 | 799.68127 | 63.29045 |
| 394.42032 | 231.88679 | 799.31635 | 63.30134 |
| 395.14719 | 231.7741  | 799.00842 | 63.39412 |
| 395.85291 | 231.94714 | 798.71417 | 63.37454 |
| 396.51672 | 231.84112 | 798.31378 | 63.57398 |
| 397.16183 | 231.75451 | 797.95569 | 63.52899 |
| 397.8989  | 231.90475 | 797.73346 | 63.63633 |
| 398.58905 | 231.89562 | 797.35327 | 63.62177 |
| 399.27332 | 231.91538 | 796.95105 | 63.68543 |
| 399.90604 | 232.04945 | 796.84747 | 63.84587 |
| 400.64014 | 232.04259 | 796.33063 | 64.00518 |
| 401.36844 | 232.0517  | 796.00165 | 63.96498 |
| 402.04459 | 232.23812 | 795.57434 | 64.02907 |
| 402.69986 | 232.22195 | 795.28314 | 64.08771 |
| 403.36642 | 232.27309 | 794.97821 | 63.99826 |
| 404.09912 | 232.13948 | 794.56494 | 64.28031 |
| 404.78983 | 232.33016 | 794.27844 | 64.18242 |
| 405.47086 | 232.38235 | 793.9682  | 64.41446 |
| 406.164   | 232.33495 | 793.6535  | 64.4372  |
| 406.85345 | 232.35309 | 793.23004 | 64.54033 |
| 407.91333 | 232.61432 | 792.91132 | 64.36404 |
| 408.59341 | 232.40874 | 792.59912 | 64.4693  |
| 409.26352 | 232.14067 | 792.28015 | 64.56041 |
| 410.03925 | 232.764   | 791.89844 | 64.5477  |
| 410.70508 | 232.53374 | 791.48706 | 64.73698 |
| 411.39798 | 232.77937 | 791.04773 | 64.81452 |
| 412.10446 | 232.75702 | 790.82178 | 64.79006 |
| 412.76611 | 232.93251 | 790.49329 | 64.84464 |
| 413.42969 | 232.83697 | 790.0661  | 64.90027 |

|           |           |           |          |
|-----------|-----------|-----------|----------|
| 414.14853 | 232.78126 | 789.68561 | 65.16511 |
| 414.80499 | 233.00944 | 789.45428 | 65.21229 |
| 415.53696 | 232.80829 | 789.11334 | 65.09618 |
| 416.25351 | 232.9001  | 788.80493 | 65.31453 |
| 416.87167 | 232.9863  | 788.41693 | 65.16017 |
| 417.6286  | 233.138   | 788.05536 | 65.24399 |
| 418.28641 | 232.99943 | 787.76282 | 65.47098 |
| 419.00314 | 233.28969 | 787.43829 | 65.50281 |
| 419.66599 | 233.03726 | 787.00537 | 65.56452 |
| 420.37924 | 233.21985 | 786.76373 | 65.54967 |
| 421.06317 | 233.23462 | 786.3891  | 65.80905 |
| 421.76953 | 233.27027 | 786.02875 | 65.83756 |
| 422.45682 | 233.35501 | 785.70972 | 65.93709 |
| 423.10672 | 233.33236 | 785.35822 | 65.99013 |
| 423.84683 | 233.50078 | 784.97107 | 65.90801 |
| 424.51303 | 233.44683 | 784.62482 | 66.0828  |
| 425.28018 | 233.67804 | 784.31891 | 66.17159 |
| 425.90695 | 233.46077 | 784.01263 | 66.14135 |
| 426.62079 | 233.64174 | 783.65283 | 66.33986 |
| 427.28006 | 233.56305 | 783.37067 | 66.30282 |
| 427.94635 | 233.65015 | 783.01935 | 66.38569 |
| 428.66949 | 233.62533 | 782.6308  | 66.33958 |
| 429.35837 | 233.59209 | 782.34277 | 66.34276 |
| 430.04062 | 233.72255 | 781.99945 | 66.55165 |
| 430.76013 | 233.86286 | 781.60455 | 66.70083 |
| 431.38165 | 233.65448 | 781.32635 | 66.62294 |
| 432.14758 | 233.7237  | 780.94769 | 66.71107 |
| 432.82272 | 233.88676 | 780.64929 | 66.7484  |
| 433.49988 | 233.78591 | 780.32605 | 66.98037 |
| 434.18112 | 233.90605 | 779.94641 | 67.05754 |
| 434.93512 | 233.87442 | 779.59967 | 67.10626 |
| 435.5853  | 233.94657 | 779.27466 | 67.03957 |
| 436.24786 | 234.14191 | 778.9549  | 67.26852 |
| 437.03305 | 234.00297 | 778.59326 | 67.19535 |
| 437.66391 | 234.39541 | 778.25806 | 67.17793 |
| 438.38623 | 234.07794 | 777.93494 | 67.43394 |
| 439.03732 | 234.31465 | 777.59375 | 67.4397  |
| 439.80045 | 234.25272 | 777.22516 | 67.5459  |
| 440.40198 | 234.12443 | 776.9563  | 67.72821 |
| 441.11505 | 234.12392 | 776.59888 | 67.6065  |
| 441.79425 | 234.3035  | 776.23492 | 67.7617  |
| 442.47617 | 234.3574  | 775.9256  | 67.76506 |
| 443.17554 | 234.30588 | 775.5799  | 67.88132 |
| 443.91431 | 234.58856 | 775.20825 | 67.92724 |
| 444.60257 | 234.29039 | 774.8703  | 68.0711  |
| 445.245   | 234.35267 | 774.55933 | 68.10384 |
| 445.98441 | 234.3328  | 774.21979 | 68.1211  |

|           |           |           |          |
|-----------|-----------|-----------|----------|
| 446.59686 | 234.36142 | 773.88824 | 68.23247 |
| 447.3649  | 234.45403 | 773.55078 | 68.25655 |
| 448.0575  | 234.49144 | 773.21552 | 68.411   |
| 448.69635 | 234.6615  | 772.83453 | 68.55642 |
| 449.42044 | 234.71456 | 772.50189 | 68.42511 |
| 450.10376 | 234.60423 | 772.1778  | 68.70984 |
| 450.77747 | 234.43351 | 771.867   | 68.66886 |
| 451.45667 | 234.60802 | 771.47083 | 68.70498 |
| 452.11026 | 234.88244 | 771.17316 | 68.8068  |
| 452.85858 | 234.7756  | 770.8913  | 68.95671 |
| 453.55402 | 234.67041 | 770.52209 | 68.98928 |
| 454.17935 | 234.65048 | 770.19287 | 69.0004  |
| 454.87805 | 234.67949 | 769.87366 | 69.19103 |
| 455.63315 | 234.69294 | 769.50348 | 69.18212 |
| 456.29681 | 234.70635 | 769.1792  | 69.26305 |
| 456.99554 | 234.75556 | 768.7962  | 69.34277 |
| 457.62955 | 234.70887 | 768.51691 | 69.59012 |
| 458.35101 | 234.71952 | 768.15216 | 69.52329 |
| 459.06778 | 234.80675 | 767.79022 | 69.68622 |
| 459.74292 | 234.72068 | 767.53894 | 69.75221 |
| 460.47507 | 234.79893 | 767.11902 | 69.78276 |
| 461.1199  | 234.86909 | 766.82471 | 69.8297  |
| 461.82523 | 234.78025 | 766.4267  | 69.90656 |
| 462.48047 | 234.94557 | 766.08344 | 70.10207 |
| 463.20447 | 235.22908 | 765.74432 | 70.06103 |
| 463.87146 | 234.71828 | 765.38306 | 70.12238 |
| 464.6069  | 235.09924 | 765.104   | 70.34654 |
| 465.29556 | 234.95618 | 764.69342 | 70.39829 |
| 465.9884  | 234.77522 | 764.42847 | 70.48298 |
| 466.72369 | 235.08502 | 764.09875 | 70.50439 |
| 467.35742 | 235.25898 | 763.68457 | 70.76581 |
| 468.04086 | 234.90502 | 763.42413 | 70.7854  |
| 468.78583 | 235.00437 | 763.06616 | 70.83018 |
| 469.44635 | 234.91313 | 762.72852 | 70.9927  |
| 470.11221 | 235.20166 | 762.34503 | 70.9648  |
| 470.80994 | 234.94468 | 762.09052 | 71.19442 |
| 471.49619 | 235.05348 | 761.72687 | 71.23745 |
| 472.17596 | 234.97903 | 761.34711 | 71.29    |
| 472.82245 | 235.09545 | 761.02075 | 71.31627 |
| 473.56512 | 235.14011 | 760.72559 | 71.41734 |
| 474.24295 | 235.63608 | 760.38678 | 71.55349 |
| 474.93497 | 235.18764 | 760.01166 | 71.70516 |
| 475.61862 | 235.1079  | 759.65381 | 71.85356 |
| 476.33014 | 235.08988 | 759.31598 | 71.89549 |
| 476.99982 | 235.2211  | 758.98425 | 72.13502 |
| 477.6503  | 235.3223  | 758.68658 | 72.02366 |
| 478.34982 | 235.32782 | 758.28259 | 72.23242 |

|           |           |           |          |
|-----------|-----------|-----------|----------|
| 479.05161 | 236.22264 | 757.84711 | 72.25977 |
| 479.75513 | 235.23722 | 757.44904 | 72.44721 |
| 480.70682 | 235.19899 | 757.28705 | 72.53202 |
| 481.35107 | 235.36173 | 756.95471 | 72.71106 |
| 482.05957 | 235.40182 | 756.64252 | 72.77195 |
| 482.76602 | 238.01636 | 756.29376 | 72.91804 |
| 483.45737 | 235.44973 | 755.94055 | 72.93127 |
| 484.08783 | 235.45195 | 755.60748 | 73.16034 |
| 484.83362 | 235.44714 | 755.31793 | 73.32046 |
| 485.53784 | 235.43094 | 754.95587 | 73.34752 |
| 486.16116 | 235.32043 | 754.6524  | 73.61594 |
| 486.89273 | 235.46995 | 754.28595 | 73.70649 |
| 487.59213 | 235.49922 | 753.9259  | 73.92598 |
| 488.31073 | 235.63031 | 753.62787 | 73.99672 |
| 488.96442 | 235.43388 | 753.29779 | 74.29362 |
| 489.60104 | 235.66563 | 752.90033 | 74.06439 |
| 490.32523 | 235.57455 | 752.58868 | 74.49867 |
| 490.98743 | 235.64426 | 752.25269 | 74.61689 |
| 491.67038 | 235.64384 | 751.92285 | 74.74385 |
| 492.42017 | 235.81026 | 751.53632 | 74.78898 |
| 493.06104 | 235.66391 | 751.24371 | 75.19238 |
| 493.75626 | 235.64419 | 750.9259  | 75.37947 |
| 494.42371 | 235.75319 | 750.52856 | 75.47637 |
| 495.1875  | 235.81282 | 750.24817 | 75.69223 |
| 495.81882 | 235.79685 | 749.87073 | 75.68871 |
| 496.50275 | 235.81257 | 749.55743 | 76.03082 |
| 497.24756 | 235.95351 | 749.25378 | 76.36673 |
| 497.88065 | 236.01813 | 748.93365 | 76.33809 |
| 498.59076 | 235.79645 | 748.5578  | 76.68295 |
| 499.211   | 235.85923 | 748.2215  | 76.80015 |
| 499.98572 | 235.88272 | 747.86755 | 77.08381 |
| 500.67178 | 236.10631 | 747.57806 | 77.33138 |
| 501.33447 | 236.06118 | 747.18219 | 77.36733 |
| 502.00314 | 236.04948 | 746.82825 | 77.7157  |
| 502.74802 | 236.24737 | 746.48669 | 77.95733 |
| 503.44077 | 236.15137 | 746.16846 | 78.29455 |
| 504.1123  | 236.1816  | 745.86853 | 78.61685 |
| 504.78687 | 236.09238 | 745.47601 | 78.75819 |
| 505.4646  | 236.29765 | 745.17493 | 79.1006  |
| 506.211   | 236.14316 | 744.8006  | 79.45919 |
| 506.90167 | 236.37587 | 744.45605 | 79.80051 |
| 507.57828 | 236.18499 | 744.14264 | 80.07845 |
| 508.23456 | 236.29823 | 743.90063 | 80.35165 |
| 508.94635 | 236.23157 | 743.50256 | 80.81567 |
| 509.59695 | 236.23381 | 743.11945 | 80.81585 |
| 510.38007 | 236.38011 | 742.79163 | 81.35995 |
| 510.96823 | 236.38267 | 742.46771 | 81.62548 |

|           |           |           |           |
|-----------|-----------|-----------|-----------|
| 511.6843  | 236.5299  | 742.18457 | 82.00587  |
| 512.38586 | 236.39124 | 741.83636 | 82.3378   |
| 513.06281 | 236.35612 | 741.44501 | 82.96874  |
| 513.74652 | 236.51787 | 741.11224 | 83.3331   |
| 514.52362 | 236.59895 | 740.79016 | 83.679    |
| 515.11835 | 236.47686 | 740.46649 | 84.16132  |
| 515.8338  | 236.49174 | 740.125   | 84.65125  |
| 516.52234 | 236.60584 | 739.75903 | 84.98035  |
| 517.18817 | 236.63037 | 739.42761 | 85.42521  |
| 517.87769 | 236.65813 | 739.07208 | 85.93007  |
| 518.57318 | 236.59622 | 738.7865  | 86.58991  |
| 519.28925 | 236.25531 | 738.3877  | 86.97679  |
| 519.99634 | 236.65326 | 738.0611  | 87.49821  |
| 520.66913 | 236.47573 | 737.68848 | 87.97435  |
| 521.28247 | 236.66666 | 737.38757 | 88.4121   |
| 522.03583 | 236.82975 | 737.03125 | 89.14571  |
| 522.69806 | 236.6844  | 736.68994 | 89.65562  |
| 523.40302 | 236.75521 | 736.36444 | 90.23142  |
| 524.10742 | 236.8361  | 736.06616 | 90.92701  |
| 524.77423 | 236.99238 | 735.70978 | 91.4235   |
| 525.45435 | 236.70612 | 735.3844  | 92.01261  |
| 526.2066  | 236.8574  | 735.01068 | 92.71759  |
| 526.84631 | 236.7971  | 734.65747 | 93.10017  |
| 527.5509  | 236.86498 | 734.34271 | 93.88843  |
| 528.22327 | 236.97984 | 734.02277 | 94.62278  |
| 528.8974  | 236.75851 | 733.6842  | 95.19079  |
| 529.62518 | 236.87913 | 733.31006 | 95.76825  |
| 530.2829  | 236.82056 | 732.99121 | 96.41595  |
| 530.99689 | 237.10586 | 732.63892 | 97.13674  |
| 531.70728 | 237.04605 | 732.32141 | 97.82003  |
| 532.34155 | 237.1013  | 731.97534 | 98.43297  |
| 533.04181 | 237.06089 | 731.63074 | 99.26675  |
| 533.78473 | 237.08487 | 731.27838 | 99.95163  |
| 534.4599  | 237.10538 | 730.99756 | 100.79808 |
| 535.14551 | 237.10068 | 730.67261 | 101.34703 |
| 535.79382 | 237.15254 | 730.26678 | 101.97679 |
| 536.53473 | 237.13751 | 729.97821 | 102.81279 |
| 537.21021 | 237.21985 | 729.67273 | 103.44731 |
| 537.98773 | 237.32253 | 729.30206 | 104.13997 |
| 538.62891 | 237.1466  | 728.86627 | 104.91843 |
| 539.31934 | 237.36881 | 728.60571 | 105.58923 |
| 539.9906  | 237.44266 | 728.29407 | 106.34547 |
| 540.61603 | 237.37567 | 727.89789 | 107.02843 |
| 541.34265 | 237.41379 | 727.62018 | 107.7884  |
| 542.005   | 237.50967 | 727.25037 | 108.37799 |
| 542.71362 | 237.5506  | 726.87701 | 109.02945 |
| 543.41461 | 237.46881 | 726.60193 | 109.90302 |



|           |           |           |           |
|-----------|-----------|-----------|-----------|
| 544.13019 | 237.47121 | 726.26392 | 110.87083 |
| 544.81403 | 237.55736 | 725.9353  | 111.48217 |
| 545.53699 | 237.48569 | 725.58325 | 112.22318 |
| 546.20221 | 237.6604  | 725.22888 | 113.0609  |
| 546.84656 | 237.49662 | 724.92114 | 113.67381 |
| 547.54242 | 237.68209 | 724.54901 | 114.48222 |
| 548.17297 | 237.51085 | 724.24524 | 115.1993  |
| 548.80859 | 237.4325  | 723.96655 | 116.18658 |
| 549.56256 | 237.68997 | 723.58038 | 116.65787 |
| 550.2597  | 237.80577 | 723.20227 | 117.58111 |
| 550.927   | 237.57687 | 722.84015 | 118.2389  |
| 551.61517 | 237.68684 | 722.54279 | 119.04017 |
| 552.39569 | 237.72124 | 722.19397 | 119.85146 |
| 553.0014  | 237.82977 | 721.83807 | 120.52599 |
| 553.69141 | 237.83391 | 721.53351 | 121.34413 |
| 554.35052 | 237.89883 | 721.15216 | 122.10092 |
| 555.06714 | 237.86212 | 720.81641 | 122.79936 |
| 555.73938 | 237.91271 | 720.47424 | 123.50608 |
| 556.48138 | 238.64243 | 720.15576 | 124.32791 |
| 557.16638 | 237.78694 | 719.82574 | 125.06189 |
| 557.87769 | 237.7228  | 719.45032 | 125.56675 |
| 558.58472 | 237.821   | 719.11261 | 126.37993 |
| 559.20111 | 237.83455 | 718.76892 | 127.12628 |
| 559.86371 | 237.85619 | 718.42761 | 127.74195 |
| 560.6192  | 238.03254 | 718.13074 | 128.29065 |
| 561.34558 | 237.87575 | 717.76349 | 129.11095 |
| 561.94879 | 238.01317 | 717.44971 | 129.91465 |
| 562.63409 | 238.02892 | 717.08453 | 130.60822 |
| 563.3512  | 238.09757 | 716.72992 | 131.20835 |
| 564.03784 | 237.9566  | 716.40344 | 131.9914  |
| 564.74097 | 238.11307 | 716.12207 | 132.66069 |
| 565.44342 | 238.14994 | 715.66602 | 133.37543 |
| 566.11707 | 237.98448 | 715.38257 | 134.06879 |
| 566.77124 | 237.94359 | 715.06549 | 134.78475 |
| 567.47089 | 237.97288 | 714.7276  | 135.41815 |
| 568.1944  | 238.02628 | 714.39844 | 136.11326 |
| 568.8692  | 238.03575 | 714.03864 | 136.83792 |
| 569.49554 | 238.09264 | 713.72131 | 137.33389 |
| 570.24463 | 238.1171  | 713.38367 | 138.07115 |
| 570.91949 | 238.01932 | 712.99609 | 138.76889 |
| 571.578   | 237.97001 | 712.46869 | 139.31088 |
| 572.22748 | 238.05384 | 712.03564 | 139.9211  |
| 572.94275 | 238.10205 | 712.07373 | 140.44711 |
| 573.64337 | 237.91081 | 711.55841 | 141.25718 |
| 574.35638 | 238.05131 | 711.31982 | 141.81379 |
| 575.04309 | 237.92831 | 710.89783 | 142.40418 |
| 575.70135 | 237.93137 | 710.6106  | 142.93329 |

|           |           |           |           |
|-----------|-----------|-----------|-----------|
| 576.37561 | 238.02056 | 710.22437 | 143.76273 |
| 577.07568 | 237.86459 | 709.96289 | 144.37522 |
| 577.76831 | 238.03827 | 709.64734 | 145.11596 |
| 578.46338 | 237.98017 | 709.35034 | 145.74583 |
| 579.1405  | 237.88145 | 708.90454 | 146.19129 |
| 579.78094 | 237.88157 | 708.64014 | 146.63408 |
| 580.52832 | 237.88328 | 708.27844 | 147.25355 |
| 581.24646 | 238.24371 | 707.9704  | 147.98725 |
| 581.98785 | 238.15458 | 707.61285 | 148.53404 |
| 582.61707 | 237.88682 | 707.29999 | 149.12297 |
| 583.32507 | 237.83917 | 706.92078 | 149.75036 |
| 584.0141  | 237.89043 | 706.62128 | 150.18207 |
| 584.65094 | 237.88776 | 706.25482 | 150.77046 |
| 585.28455 | 238.04459 | 705.91675 | 151.43755 |
| 586.0517  | 237.97532 | 705.3548  | 152.01645 |
| 586.75604 | 238.04028 | 705.224   | 152.58378 |
| 587.45697 | 238.01379 | 704.92859 | 153.14856 |
| 588.04706 | 237.89213 | 704.51941 | 153.72151 |
| 588.75037 | 238.02867 | 704.23804 | 154.22764 |
| 589.51361 | 237.96058 | 703.88727 | 154.68338 |
| 590.1416  | 237.94797 | 703.55438 | 155.31572 |
| 590.87219 | 237.79545 | 703.16772 | 155.78866 |
| 591.54785 | 237.86023 | 702.87378 | 156.3091  |
| 592.25262 | 237.79654 | 702.51007 | 156.91097 |
| 592.91205 | 238.0721  | 702.33264 | 157.26993 |
| 593.62482 | 237.91684 | 701.88379 | 157.89449 |
| 594.30219 | 237.82309 | 701.55646 | 158.35976 |
| 595.01221 | 238.10089 | 701.14508 | 158.82141 |
| 595.71368 | 238.00353 | 701.0531  | 159.2341  |
| 596.38556 | 237.96496 | 700.74994 | 159.75156 |
| 597.02722 | 237.83307 | 700.36072 | 160.28496 |
| 597.71503 | 237.93523 | 699.81586 | 160.85016 |
| 598.4129  | 237.7503  | 699.66846 | 161.35201 |
| 599.12689 | 237.86096 | 699.40796 | 161.82744 |
| 599.83545 | 237.7839  | 698.72455 | 162.26731 |
| 600.48505 | 237.74539 | 698.69928 | 162.79125 |
| 601.15466 | 237.70333 | 698.41241 | 163.26018 |
| 601.89532 | 237.77237 | 697.72772 | 163.9507  |
| 602.53564 | 237.70461 | 697.87854 | 164.32037 |
| 603.26495 | 237.79225 | 697.37604 | 164.87788 |
| 603.92267 | 237.58885 | 696.89825 | 165.32085 |
| 604.61487 | 237.63728 | 696.73572 | 166.03936 |
| 605.3125  | 237.73559 | 696.06305 | 166.39976 |
| 605.99445 | 237.60999 | 695.91656 | 166.98771 |
| 606.65912 | 237.70211 | 694.93793 | 167.61385 |
| 607.41467 | 237.72589 | 694.40271 | 167.96929 |
| 608.04163 | 237.82925 | 694.79926 | 168.56309 |

|           |           |           |           |
|-----------|-----------|-----------|-----------|
| 608.70795 | 237.43868 | 694.15851 | 168.89048 |
| 609.43842 | 237.64811 | 693.62988 | 169.2501  |
| 610.09521 | 237.7293  | 692.92834 | 169.75553 |
| 610.8316  | 237.79031 | 693.10944 | 170.34613 |
| 611.48328 | 237.68709 | 693.40619 | 170.95604 |
| 612.15045 | 237.67378 | 693.1662  | 171.36127 |
| 612.83667 | 237.60234 | 691.43195 | 171.94344 |
| 613.55426 | 237.58226 | 692.237   | 172.46202 |
| 614.2774  | 237.39129 | 691.94537 | 173.09333 |
| 614.95703 | 237.32773 | 691.22876 | 173.37677 |
| 615.56763 | 237.31678 | 691.16772 | 174.00055 |
| 616.3338  | 237.31838 | 689.76611 | 174.47567 |
| 616.99652 | 237.44745 | 690.05737 | 174.72686 |
| 617.72955 | 237.59303 | 690.05603 | 175.23386 |
| 618.37622 | 237.27104 | 689.66815 | 175.98174 |
| 618.9986  | 237.30398 | 689.50397 | 176.3722  |
| 619.73993 | 237.29058 | 689.16675 | 176.86424 |
| 620.3642  | 237.18484 | 688.54321 | 177.44638 |
| 621.08289 | 237.19313 | 688.39471 | 177.89788 |
| 621.71021 | 237.20654 | 687.7923  | 178.45356 |
| 622.46765 | 237.38895 | 687.69781 | 178.93193 |
| 623.12347 | 237.1152  | 686.59753 | 179.39171 |
| 623.82422 | 237.27038 | 686.58179 | 179.78405 |
| 624.5661  | 237.04707 | 686.07471 | 180.20808 |
| 625.22217 | 237.25576 | 685.64197 | 180.63435 |
| 625.91797 | 236.81002 | 685.79224 | 181.28903 |
| 626.62323 | 237.08686 | 685.29047 | 181.68097 |
| 627.29089 | 237.20977 | 684.93188 | 181.93207 |
| 628.02844 | 236.83862 | 683.13831 | 182.44752 |
| 628.59247 | 237.0232  | 684.07581 | 182.82564 |
| 629.37128 | 236.99335 | 683.82672 | 182.98133 |
| 630.08203 | 236.97973 | 683.50854 | 183.66159 |
| 630.76453 | 237.05997 | 683.06775 | 184.22051 |
| 631.4682  | 236.76018 | 683.23334 | 184.87277 |
| 632.14642 | 236.94636 | 682.2157  | 185.19455 |
| 632.75885 | 236.8522  | 682.88654 | 185.70927 |
| 633.41217 | 236.68524 | 681.68127 | 186.09458 |
| 634.15253 | 236.8464  | 682.10651 | 186.52514 |
| 634.86346 | 236.77544 | 681.53864 | 187.25371 |
| 635.57086 | 236.65299 | 680.10706 | 187.52278 |
| 636.28528 | 236.66732 | 680.23407 | 187.84494 |
| 636.99377 | 236.52197 | 679.58551 | 188.16881 |
| 637.58539 | 236.61028 | 679.24506 | 188.67195 |
| 638.19965 | 236.58998 | 679.64441 | 189.02663 |
| 639.03235 | 236.37256 | 679.73816 | 189.65025 |
| 639.6748  | 236.50345 | 679.34216 | 190.13844 |
| 640.39618 | 236.32426 | 678.258   | 190.6687  |

|           |           |           |           |
|-----------|-----------|-----------|-----------|
| 641.06628 | 236.31815 | 678.6416  | 191.1869  |
| 641.76581 | 236.62929 | 678.58002 | 191.52488 |
| 642.43774 | 236.26041 | 676.05823 | 191.92439 |
| 643.10809 | 236.26971 | 676.70618 | 192.15833 |
| 643.73187 | 236.28278 | 675.78424 | 192.59457 |
| 644.51752 | 236.22978 | 675.44904 | 192.99333 |
| 645.19684 | 236.0083  | 675.48163 | 193.42784 |
| 645.91736 | 236.08298 | 673.53601 | 193.93693 |
| 646.57184 | 236.34737 | 673.96582 | 194.26915 |
| 647.28522 | 236.1906  | 673.21149 | 194.69444 |
| 647.96942 | 236.13248 | 672.87445 | 195.19104 |
| 648.63684 | 236.19084 | 674.05225 | 195.57145 |
| 649.37738 | 236.04276 | 673.90735 | 196.09292 |
| 650.01978 | 236.17684 | 673.82178 | 196.55291 |
| 650.76154 | 236.02665 | 673.38074 | 197.05062 |
| 651.45551 | 236.01369 | 673.10278 | 197.58432 |
| 652.16437 | 236.1624  | 672.51154 | 198.14132 |
| 652.79083 | 236.14034 | 670.09119 | 198.29583 |
| 653.4787  | 235.97445 | 671.02332 | 198.68232 |
| 654.20886 | 236.08307 | 669.06476 | 199.02501 |
| 654.94678 | 235.81518 | 670.8479  | 199.34377 |
| 655.56415 | 235.89307 | 670.43378 | 200.00611 |
| 656.3266  | 235.82351 | 670.54016 | 200.39519 |
| 657.00616 | 235.84144 | 670.05139 | 200.88285 |
| 657.65417 | 235.77212 | 670.28827 | 201.39896 |
| 658.35254 | 235.73133 | 670.35699 | 201.80209 |
| 659.02777 | 235.50521 | 669.93335 | 202.10707 |
| 659.75415 | 235.64662 | 669.67029 | 202.60853 |
| 660.42456 | 235.57934 | 669.37622 | 203.13193 |
| 661.08215 | 235.43213 | 668.72192 | 203.35058 |
| 661.80914 | 235.58865 | 668.43567 | 203.76872 |
| 662.46765 | 235.35847 | 668.29645 | 204.17892 |
| 663.15002 | 235.48279 | 667.77277 | 204.63286 |
| 663.84393 | 235.37281 | 666.29822 | 205.13376 |
| 664.53461 | 235.35878 | 666.9986  | 205.40536 |
| 665.15936 | 235.14156 | 666.77832 | 205.82784 |
| 665.84882 | 235.04564 | 666.53906 | 206.16679 |
| 666.66974 | 235.18266 | 666.09009 | 206.55666 |
| 667.30719 | 235.13859 | 665.52502 | 207.03142 |
| 668.00299 | 235.09826 | 665.44556 | 207.45919 |
| 668.66693 | 235.00345 | 664.94177 | 207.88049 |
| 669.24152 | 234.95822 | 664.91125 | 208.12025 |
| 670.0509  | 235.03334 | 664.03729 | 208.53319 |
| 670.64252 | 234.88726 | 663.88214 | 208.91459 |
| 671.36151 | 234.9714  | 663.23999 | 209.17345 |
| 671.98071 | 235.00089 | 663.36761 | 209.57073 |
| 672.7475  | 234.95625 | 662.94324 | 209.73189 |

|           |           |           |           |
|-----------|-----------|-----------|-----------|
| 673.49762 | 235.09463 | 662.68604 | 210.4529  |
| 674.0661  | 235.15381 | 662.38147 | 210.57759 |
| 674.86359 | 234.82544 | 661.36981 | 210.99786 |
| 675.55707 | 234.79582 | 661.53461 | 211.41599 |
| 676.25232 | 234.84999 | 661.07593 | 211.82101 |
| 676.95667 | 234.7292  | 661.01135 | 212.12683 |
| 677.65411 | 234.44853 | 659.94409 | 212.56498 |
| 678.3786  | 234.72991 | 659.25616 | 212.77688 |
| 679.08038 | 234.75473 | 658.7879  | 213.33185 |
| 679.76855 | 234.62502 | 659.8028  | 213.53532 |
| 680.47809 | 234.5674  | 659.12628 | 213.76014 |
| 681.18347 | 234.53652 | 659.25952 | 214.25162 |
| 681.85583 | 234.50368 | 658.5885  | 214.61367 |
| 682.52338 | 234.44263 | 657.42169 | 214.88714 |
| 683.2099  | 234.40997 | 657.5155  | 215.20237 |
| 683.96735 | 234.64042 | 657.37134 | 215.49136 |
| 684.62122 | 234.39913 | 657.66431 | 216.00652 |
| 685.29974 | 234.57062 | 656.84943 | 216.39589 |
| 685.98547 | 234.3455  | 656.4873  | 216.60242 |
| 686.69788 | 234.37296 | 656.15869 | 216.89523 |
| 687.33795 | 234.3105  | 655.94666 | 217.35092 |
| 688.09131 | 234.3038  | 655.56689 | 217.681   |
| 688.73425 | 234.23244 | 655.39178 | 217.95117 |
| 689.45874 | 234.45373 | 654.90326 | 218.44823 |
| 690.12402 | 234.18024 | 654.86139 | 218.67767 |
| 690.8269  | 234.25666 | 653.92615 | 218.93571 |
| 691.53503 | 234.1313  | 653.95105 | 219.28944 |
| 692.20428 | 234.05642 | 653.89545 | 219.60573 |
| 692.91431 | 234.00431 | 653.01837 | 220.05723 |
| 693.59479 | 234.09023 | 652.34601 | 220.36478 |
| 694.30463 | 234.02503 | 652.92212 | 220.4797  |
| 694.98224 | 234.19712 | 652.20923 | 221.04072 |
| 695.60992 | 234.07688 | 651.82813 | 221.26046 |
| 696.34589 | 233.98858 | 651.33325 | 221.65816 |
| 696.99872 | 234.17904 | 650.74408 | 221.94481 |
| 697.72638 | 233.87941 | 650.60614 | 222.24993 |
| 698.38593 | 233.9211  | 650.31903 | 222.72429 |
| 699.06604 | 233.83102 | 649.85107 | 222.89055 |
| 699.78882 | 234.02263 | 649.65057 | 223.41371 |
| 700.47601 | 233.91685 | 649.57306 | 223.74229 |
| 701.18518 | 233.74562 | 648.97675 | 224.08286 |
| 701.81366 | 233.81812 | 648.76428 | 224.53687 |
| 702.53558 | 233.78216 | 648.50275 | 224.64875 |
| 703.2478  | 233.7556  | 647.9967  | 224.98855 |
| 703.86737 | 233.55264 | 647.65698 | 225.26383 |
| 704.59259 | 233.45607 | 647.27655 | 225.55735 |
| 705.28937 | 233.52351 | 646.9931  | 225.83482 |

|           |           |           |           |
|-----------|-----------|-----------|-----------|
| 705.97961 | 233.75542 | 646.39661 | 226.10518 |
| 706.67566 | 233.41466 | 645.69446 | 226.51241 |
| 707.38361 | 233.49825 | 645.66046 | 226.58619 |
| 708.02313 | 233.46678 | 644.82611 | 227.05564 |
| 708.69885 | 233.31592 | 644.68774 | 227.2155  |
| 709.38257 | 233.188   | 644.93939 | 227.72961 |
| 710.07581 | 233.17692 | 644.54462 | 227.78585 |
| 710.81226 | 233.24656 | 643.84613 | 228.28631 |
| 711.49017 | 232.88442 | 643.86609 | 228.55441 |
| 712.17596 | 232.91001 | 643.51855 | 228.94511 |
| 712.90344 | 232.80366 | 643.02875 | 229.13583 |
| 713.58533 | 233.15297 | 642.86121 | 229.35302 |
| 714.26105 | 232.49496 | 642.62421 | 229.69668 |
| 714.9151  | 232.54883 | 642.37604 | 230.01145 |
| 715.63763 | 232.48143 | 641.89215 | 230.30197 |
| 716.30798 | 232.27613 | 641.67303 | 230.50967 |
| 716.98041 | 232.41797 | 641.29663 | 230.73002 |
| 717.65503 | 232.05219 | 640.70215 | 231.05794 |
| 718.38617 | 232.06282 | 639.48071 | 231.39574 |
| 719.05945 | 231.9672  | 639.896   | 231.62432 |
| 719.75592 | 231.9706  | 639.92285 | 231.7966  |
| 720.4054  | 231.72612 | 639.461   | 232.1922  |
| 721.12769 | 231.64373 | 638.96661 | 232.42553 |
| 721.81177 | 231.58106 | 638.55444 | 232.75852 |
| 722.48462 | 231.42738 | 638.10596 | 232.98375 |
| 723.22498 | 231.38477 | 637.94678 | 233.18318 |
| 723.86938 | 231.37578 | 637.02075 | 233.48864 |
| 724.54553 | 231.01027 | 636.88733 | 233.79299 |
| 725.23676 | 230.81284 | 636.69897 | 234.17485 |
| 725.91284 | 230.76464 | 636.2702  | 234.38665 |
| 726.8736  | 230.61862 | 636.26782 | 234.60962 |
| 727.52997 | 230.2516  | 635.78424 | 234.91552 |
| 728.29553 | 229.90959 | 635.83466 | 235.15666 |
| 728.97125 | 229.77819 | 635.1264  | 235.49475 |
| 729.65552 | 229.3329  | 634.77863 | 235.72279 |
| 730.26898 | 229.50022 | 634.84595 | 235.93502 |
| 731.02264 | 229.20863 | 633.94348 | 236.18827 |
| 731.71277 | 229.36634 | 634.26874 | 236.59145 |
| 732.41473 | 228.91637 | 633.70233 | 236.82443 |
| 733.02747 | 228.73469 | 633.63025 | 237.11506 |
| 733.6925  | 228.53622 | 633.18378 | 237.44229 |
| 734.46722 | 228.27918 | 632.59406 | 237.5955  |
| 735.14813 | 227.95409 | 632.466   | 237.93055 |
| 735.82928 | 227.83798 | 632.20105 | 238.08521 |
| 736.48328 | 227.65083 | 631.60992 | 238.25776 |
| 737.27301 | 227.33286 | 631.15485 | 238.56655 |
| 737.8537  | 227.21782 | 631.0918  | 238.84974 |

|           |           |           |           |
|-----------|-----------|-----------|-----------|
| 738.64587 | 226.77107 | 630.57971 | 239.10212 |
| 739.30658 | 226.84942 | 630.39325 | 239.40236 |
| 739.97437 | 226.0411  | 629.47858 | 239.64184 |
| 740.68048 | 225.42836 | 629.80713 | 239.82942 |
| 741.33173 | 225.32594 | 629.17249 | 240.09028 |
| 742.09509 | 224.97309 | 629.23743 | 240.29179 |
| 742.7674  | 224.48167 | 628.98743 | 240.57245 |
| 743.41766 | 224.35454 | 628.46436 | 240.77692 |
| 744.1618  | 223.99636 | 627.76978 | 241.01652 |
| 744.82275 | 223.67194 | 627.25873 | 241.31578 |
| 745.51959 | 223.46419 | 627.10608 | 241.55658 |
| 746.24054 | 223.38141 | 626.9057  | 241.59854 |
| 746.85199 | 222.91927 | 626.89423 | 241.84274 |
| 747.5752  | 223.1719  | 625.87274 | 242.16429 |
| 748.29535 | 222.86185 | 625.59943 | 242.28249 |
| 748.95355 | 223.07081 | 625.82654 | 242.54624 |
| 749.64233 | 222.26164 | 624.16016 | 242.88234 |
| 750.32343 | 221.89523 | 624.60059 | 243.0556  |
| 751.04126 | 221.67344 | 623.08472 | 243.24409 |
| 751.94977 | 221.51208 | 623.94977 | 243.46128 |
| 752.67816 | 220.90316 | 623.46326 | 243.81212 |
| 753.3595  | 220.03912 | 622.86078 | 243.81664 |
| 754.00739 | 220.41792 | 621.65485 | 244.14232 |
| 754.73706 | 220.16122 | 621.43054 | 244.2281  |
| 755.42871 | 219.33944 | 621.56458 | 244.60677 |
| 756.1051  | 219.36644 | 621.85858 | 244.7286  |
| 756.82867 | 218.90317 | 621.57275 | 244.98572 |
| 757.51318 | 218.61019 | 621.09692 | 245.1215  |
| 758.20447 | 218.41812 | 620.68506 | 245.40084 |
| 758.91986 | 218.19021 | 620.49304 | 245.62019 |
| 759.58307 | 217.63643 | 619.69672 | 245.83147 |
| 760.26752 | 217.49583 | 619.46759 | 245.97202 |
| 760.98212 | 216.53141 | 619.1347  | 246.31984 |
| 761.66211 | 216.36869 | 618.55872 | 246.56116 |
| 762.36621 | 216.37225 | 618.06348 | 246.72821 |
| 763.02002 | 216.04106 | 618.27057 | 246.97627 |
| 763.74719 | 215.79695 | 617.94946 | 247.34638 |
| 764.45282 | 214.89061 | 617.4671  | 247.40372 |
| 765.13184 | 214.69438 | 617.49194 | 247.75275 |
| 765.83923 | 213.89739 | 617.08569 | 247.92567 |
| 766.51373 | 213.77565 | 616.73022 | 248.20354 |
| 767.17859 | 213.34254 | 616.54999 | 248.34636 |
| 767.90875 | 212.85756 | 616.37311 | 248.53282 |
| 768.56738 | 212.32668 | 616.36938 | 248.91204 |
| 769.2746  | 211.88872 | 616.00397 | 249.15346 |
| 770.00098 | 211.81397 | 615.78296 | 249.36483 |
| 770.61658 | 211.4413  | 615.6087  | 249.65045 |

|           |           |           |           |
|-----------|-----------|-----------|-----------|
| 771.39832 | 210.98783 | 615.01648 | 249.71237 |
| 772.00122 | 210.85204 | 614.49249 | 250.12536 |
| 772.77777 | 210.08813 | 614.35266 | 250.17397 |
| 773.4165  | 209.41602 | 614.06055 | 250.47354 |
| 774.12714 | 209.35983 | 613.80261 | 250.63465 |
| 774.85309 | 208.78632 | 613.33588 | 250.79345 |
| 775.42883 | 208.48403 | 613.16125 | 251.02795 |
| 776.19269 | 208.06598 | 612.68555 | 251.27826 |
| 776.86285 | 207.54844 | 612.20227 | 251.58484 |
| 777.58466 | 207.11899 | 611.94073 | 251.75691 |
| 778.29022 | 206.53474 | 611.41266 | 252.01249 |
| 778.96326 | 205.98695 | 611.38904 | 252.1877  |
| 779.61011 | 205.25277 | 610.88654 | 252.44263 |
| 780.32452 | 204.97449 | 609.72766 | 252.59592 |
| 781.03864 | 204.29279 | 610.45117 | 252.90597 |
| 781.68201 | 203.83322 | 610.04718 | 252.87705 |
| 782.42407 | 203.54997 | 609.73083 | 253.23998 |
| 783.05725 | 203.03289 | 608.2901  | 253.39396 |
| 783.79218 | 202.47083 | 608.75983 | 253.64266 |
| 784.45135 | 201.87486 | 607.23657 | 253.91593 |
| 785.14935 | 201.20098 | 607.76111 | 254.07641 |
| 785.8031  | 200.68648 | 607.61865 | 254.21269 |
| 786.51355 | 200.02456 | 607.30139 | 254.56415 |
| 787.13788 | 199.66444 | 605.86017 | 254.67468 |
| 787.84692 | 199.4645  | 606.34393 | 254.87458 |
| 788.54083 | 198.75966 | 605.79205 | 254.99658 |
| 789.25555 | 198.1352  | 605.55377 | 255.27189 |
| 789.88385 | 197.87838 | 606.01013 | 255.58945 |
| 790.64563 | 197.63718 | 605.10608 | 255.73375 |
| 791.30505 | 196.93411 | 605.08337 | 255.78928 |
| 792.00677 | 197.13553 | 604.25049 | 256.16027 |
| 792.67554 | 196.23146 | 604.34619 | 256.35967 |
| 793.33667 | 195.58462 | 604.3161  | 256.54117 |
| 794.06805 | 195.05416 | 603.9054  | 256.71696 |
| 794.76666 | 194.43402 | 603.33649 | 256.94622 |
| 795.43945 | 194.18923 | 603.38617 | 257.22734 |
| 796.10883 | 193.88621 | 602.93774 | 257.39108 |
| 796.78741 | 193.43246 | 602.73242 | 257.52976 |
| 797.50085 | 192.65716 | 602.36627 | 257.69314 |
| 798.1778  | 192.5044  | 601.68152 | 257.84748 |
| 798.89178 | 191.91136 | 601.13379 | 258.15214 |
| 799.54431 | 191.3663  | 601.17456 | 258.15825 |
| 800.24048 | 190.68296 | 600.42566 | 258.42511 |
| 800.91278 | 190.46401 | 600.17395 | 258.53941 |
| 801.61584 | 189.64707 | 599.90924 | 258.80275 |
| 802.30273 | 189.18885 | 599.8891  | 258.9595  |
| 803.00201 | 188.70865 | 599.18463 | 259.10549 |



|           |           |           |           |
|-----------|-----------|-----------|-----------|
| 803.63202 | 188.43579 | 598.80194 | 259.28899 |
| 804.36975 | 188.05313 | 598.73987 | 259.53458 |
| 805.0824  | 187.48932 | 598.39856 | 259.5797  |
| 805.72473 | 187.19979 | 598.36163 | 259.90254 |
| 806.47083 | 186.87777 | 597.82257 | 260.2003  |
| 807.17816 | 186.05884 | 597.39941 | 260.29984 |
| 807.81104 | 185.80567 | 597.32733 | 260.46235 |
| 808.50629 | 185.52093 | 597.00421 | 260.64673 |
| 809.20667 | 185.40621 | 596.61945 | 260.7581  |
| 809.9021  | 185.19901 | 596.27527 | 260.8936  |
| 810.59387 | 184.80423 | 595.94482 | 261.24315 |
| 811.22095 | 184.19912 | 595.63654 | 261.249   |
| 811.84943 | 183.87852 | 595.09601 | 261.35327 |
| 812.68121 | 183.47835 | 594.76581 | 261.54095 |
| 813.36316 | 183.05256 | 594.62415 | 261.78627 |
| 814.10809 | 182.33406 | 594.23993 | 261.92277 |
| 814.78851 | 181.44437 | 593.52344 | 262.24157 |
| 815.36993 | 180.21731 | 593.48871 | 262.43605 |
| 816.00842 | 180.25604 | 593.18622 | 262.55914 |
| 816.74957 | 179.94696 | 592.52814 | 262.73678 |
| 817.42261 | 179.82502 | 591.93848 | 262.75404 |
| 818.12439 | 178.80934 | 591.86914 | 263.0004  |
| 818.79449 | 179.16013 | 591.59143 | 263.10921 |
| 819.48077 | 178.84623 | 591.53595 | 263.2641  |
| 820.15118 | 178.78849 | 591.29626 | 263.42298 |
| 820.75574 | 178.33334 | 590.89307 | 263.60614 |
| 821.53735 | 178.26822 | 590.53571 | 263.90802 |
| 822.24377 | 177.85045 | 590.26782 | 263.91157 |
| 822.92914 | 177.5898  | 589.87103 | 264.05076 |
| 823.64264 | 177.52606 | 589.57269 | 264.35342 |
| 824.31079 | 177.47194 | 589.16461 | 264.25043 |
| 825.00513 | 176.81541 | 588.93787 | 264.51589 |
| 825.66345 | 176.72011 | 588.54938 | 264.68474 |
| 826.4422  | 176.7266  | 588.1463  | 264.85192 |
| 827.06927 | 176.55077 | 587.742   | 264.75214 |
| 827.73792 | 176.25388 | 587.42615 | 265.14377 |
| 828.4563  | 175.99932 | 587.23676 | 265.18157 |
| 829.1499  | 175.32346 | 586.78967 | 265.23503 |
| 829.8562  | 175.23636 | 586.50153 | 265.36557 |
| 830.61121 | 174.66331 | 586.24548 | 265.65285 |
| 831.25    | 173.7957  | 585.82507 | 265.85625 |
| 831.89935 | 173.08011 | 585.42163 | 265.95588 |
| 832.54071 | 172.21915 | 585.1272  | 266.27158 |
| 833.26801 | 172.43022 | 584.81268 | 266.34986 |
| 833.94983 | 172.37163 | 584.46588 | 266.3011  |
| 834.62146 | 171.70678 | 584.09058 | 266.48915 |
| 835.28748 | 171.89636 | 583.72485 | 266.57689 |

|           |           |           |           |
|-----------|-----------|-----------|-----------|
| 835.97845 | 171.53453 | 582.96515 | 266.74405 |
| 836.68896 | 171.11023 | 583.05365 | 266.96273 |
| 837.37134 | 170.72307 | 582.73212 | 267.05857 |
| 838.05438 | 170.15245 | 582.42322 | 267.18733 |
| 838.77124 | 171.4245  | 582.04877 | 267.51347 |
| 839.38983 | 170.88654 | 581.73004 | 267.56756 |
| 840.04321 | 170.67673 | 581.36786 | 267.68125 |
| 840.85669 | 170.62324 | 581.07452 | 267.82802 |
| 841.52972 | 170.76069 | 580.70703 | 268.18734 |
| 842.20654 | 170.20165 | 580.42151 | 268.24111 |
| 842.87488 | 169.81978 | 580.01611 | 268.33932 |
| 843.60657 | 169.49313 | 579.66223 | 268.60189 |
| 844.28986 | 169.2337  | 579.35419 | 268.59417 |
| 844.98749 | 169.40108 | 579.03577 | 268.8783  |
| 845.74463 | 168.9388  | 578.70197 | 268.98161 |
| 846.39026 | 167.66062 | 578.29871 | 269.20013 |
| 847.03839 | 167.50416 | 577.99695 | 269.29173 |
| 847.71814 | 167.68088 | 577.67609 | 269.53747 |
| 848.36273 | 167.43639 | 577.31079 | 269.76656 |
| 849.04803 | 167.85224 | 576.9516  | 269.7522  |
| 849.80157 | 167.7445  | 576.61554 | 270.03981 |
| 850.51807 | 167.60477 | 576.33136 | 270.12091 |
| 851.23755 | 167.08112 | 575.99835 | 270.31948 |
| 851.88873 | 166.44684 | 575.65167 | 270.45798 |
| 852.53003 | 166.55521 | 575.27472 | 270.55095 |
| 853.24133 | 166.22502 | 574.97968 | 270.66321 |
| 853.93652 | 165.7929  | 574.58582 | 271.04009 |
| 854.73309 | 165.51612 | 574.26849 | 271.04483 |
| 855.44757 | 164.83641 | 573.96161 | 271.25408 |
| 856.02838 | 164.55859 | 573.61334 | 271.47959 |
| 856.69635 | 164.83044 | 573.28241 | 271.48373 |
| 857.38202 | 164.61188 | 572.8772  | 271.65703 |
| 858.06232 | 164.01547 | 572.6806  | 271.81739 |
| 858.76019 | 163.7213  | 572.26617 | 271.97883 |
| 859.46112 | 164.54768 | 571.9231  | 271.99616 |
| 860.13159 | 164.33531 | 571.65631 | 272.07037 |
| 860.85596 | 164.2892  | 571.24811 | 272.2387  |
| 861.66882 | 164.0764  | 570.95148 | 272.39195 |
| 862.88226 | 162.66412 | 570.55719 | 272.53916 |
| 863.26154 | 161.61089 | 570.21271 | 272.64    |
| 863.91205 | 161.167   | 569.92834 | 272.69045 |
| 864.54388 | 161.15474 | 569.6062  | 272.85714 |
| 865.23975 | 161.05069 | 569.18317 | 272.95217 |
| 865.77692 | 161.12762 | 568.84985 | 273.00045 |
| 866.53345 | 160.80135 | 568.57019 | 272.96896 |
| 867.09216 | 160.74177 | 568.23425 | 273.06778 |
| 867.83112 | 160.74742 | 567.91284 | 273.16093 |

|           |           |           |           |
|-----------|-----------|-----------|-----------|
| 868.69733 | 160.76659 | 567.50146 | 273.07357 |
| 869.26483 | 160.46306 | 567.24011 | 273.10509 |
| 869.84326 | 160.63978 | 566.8858  | 273.30605 |
| 870.51349 | 160.62782 | 566.49164 | 273.38703 |
| 871.16595 | 160.65234 | 566.18579 | 273.39653 |
| 871.88458 | 160.75665 | 565.85925 | 273.32966 |
| 872.57745 | 161.01156 | 565.50726 | 273.60244 |
| 873.289   | 161.22234 | 565.15204 | 273.68617 |
| 873.94604 | 161.04475 | 564.79602 | 273.82034 |
| 874.62897 | 161.13536 | 564.48004 | 273.84521 |
| 875.32635 | 161.19801 | 564.14606 | 274.07196 |
| 876.00696 | 161.24404 | 563.85254 | 274.11475 |
| 876.71423 | 161.40793 | 563.42444 | 274.33235 |
| 877.37592 | 161.46742 | 563.11572 | 274.46081 |
| 878.04932 | 161.73783 | 562.37323 | 274.57225 |
| 878.72699 | 161.56055 | 562.47345 | 274.71789 |
| 879.44342 | 161.9267  | 561.7644  | 274.90217 |
| 880.13098 | 161.87868 | 561.57556 | 274.93737 |
| 880.8194  | 161.85659 | 561.34674 | 275.11547 |
| 881.52509 | 161.90135 | 561.08081 | 275.32611 |
| 882.21307 | 161.89223 | 560.7514  | 275.34766 |
| 882.90161 | 162.01541 | 560.39612 | 275.69019 |
| 883.638   | 161.92871 | 560.09747 | 275.64153 |
| 884.25629 | 161.94006 | 559.64185 | 275.76415 |
| 884.98065 | 161.97106 | 559.42371 | 275.90857 |
| 885.64551 | 161.88698 | 559.03357 | 276.17324 |
| 886.39862 | 161.85372 | 558.68152 | 276.2584  |
| 887.01843 | 161.9019  | 558.29004 | 276.33236 |
| 887.73151 | 161.69836 | 557.90552 | 276.47365 |
| 888.4173  | 161.60837 | 557.53247 | 276.565   |
| 889.086   | 161.39941 | 557.27118 | 276.77504 |
| 889.75    | 161.29939 | 556.85828 | 276.90799 |
| 890.55566 | 161.26635 | 556.65302 | 277.06232 |
| 891.12122 | 160.87825 | 556.22162 | 277.19798 |
| 891.84064 | 160.80605 | 555.93372 | 277.17828 |
| 892.50269 | 160.61892 | 555.48029 | 277.37509 |
| 893.21826 | 160.42978 | 555.24805 | 277.54994 |
| 893.89948 | 160.11072 | 554.91119 | 277.76484 |
| 894.5672  | 159.90521 | 554.5788  | 277.82449 |
| 895.28821 | 159.92953 | 554.26965 | 277.89822 |
| 896.01318 | 159.39364 | 553.88953 | 278.0519  |
| 896.68408 | 159.13763 | 553.68359 | 278.25411 |
| 897.30017 | 159.00255 | 553.32281 | 278.31413 |
| 898.00739 | 158.37413 | 552.95538 | 278.61989 |
| 898.74493 | 158.22579 | 552.62738 | 278.61892 |
| 899.40558 | 158.01206 | 552.15411 | 278.8166  |
| 900.09875 | 157.34846 | 551.68634 | 278.93467 |

|           |           |           |           |
|-----------|-----------|-----------|-----------|
| 900.85089 | 157.206   | 551.51721 | 278.96098 |
| 901.49823 | 156.6983  | 551.1228  | 279.08104 |
| 902.13177 | 156.58583 | 550.6944  | 279.19145 |
| 902.87567 | 155.99802 | 550.35187 | 279.40205 |
| 903.53241 | 155.60059 | 550.31891 | 279.56771 |
| 904.22766 | 155.11052 | 549.91486 | 279.55119 |
| 904.9342  | 154.80697 | 549.63135 | 279.79702 |
| 905.57971 | 154.28667 | 549.21448 | 279.88199 |
| 906.29358 | 153.77807 | 548.85077 | 280.18599 |
| 907.03961 | 153.29601 | 548.58472 | 280.02862 |
| 907.64441 | 152.69147 | 548.25598 | 280.1956  |
| 908.35736 | 152.67183 | 547.92078 | 280.44394 |
| 909.09253 | 151.83283 | 547.55402 | 280.54932 |
| 909.74792 | 151.50931 | 547.16516 | 280.63038 |
| 910.47064 | 150.72541 | 546.88251 | 280.82903 |
| 911.16827 | 150.30409 | 546.56213 | 280.85639 |
| 911.86365 | 149.84379 | 546.23615 | 280.88663 |
| 912.56372 | 149.37825 | 545.88568 | 281.0137  |
| 915.22308 | 148.40998 | 545.51196 | 281.28589 |
| 913.99036 | 148.02084 | 545.22351 | 281.3954  |
| 914.63379 | 147.58322 | 544.80432 | 281.54516 |
| 915.33057 | 147.1165  | 544.44507 | 281.68266 |
| 915.96704 | 146.39621 | 544.10773 | 281.65924 |
| 916.7066  | 145.83465 | 543.86865 | 281.94419 |
| 917.383   | 145.14477 | 543.50024 | 282.04159 |
| 916.17621 | 144.60473 | 543.15088 | 282.16826 |
| 917.92487 | 143.78784 | 542.8313  | 282.13797 |
| 919.47955 | 143.19274 | 542.41449 | 282.42084 |
| 920.05566 | 142.59793 | 542.15778 | 282.57089 |
| 920.86493 | 141.99585 | 541.84839 | 282.62502 |
| 921.98151 | 141.04614 | 541.52222 | 282.83289 |
| 921.58868 | 140.36707 | 541.13806 | 282.98834 |
| 922.62347 | 139.86238 | 540.80463 | 282.95446 |
| 923.09564 | 139.16638 | 540.48962 | 283.1274  |
| 924.55884 | 138.29087 | 540.13544 | 283.33725 |
| 925.48114 | 137.36748 | 539.78101 | 283.31745 |
| 924.3797  | 136.97126 | 539.4837  | 283.40663 |
| 926.55188 | 136.13915 | 539.13989 | 283.69071 |
| 927.58264 | 135.53706 | 538.77832 | 283.75056 |
| 927.21136 | 134.61393 | 538.4353  | 283.85592 |
| 927.14215 | 133.7275  | 537.95868 | 284.04732 |
| 927.96576 | 132.95935 | 537.74646 | 284.09092 |
| 928.62152 | 132.0615  | 537.26776 | 284.24989 |
| 930.47589 | 131.41774 | 537.06592 | 284.47445 |
| 931.18927 | 130.74857 | 536.65997 | 284.49684 |
| 931.85876 | 129.73083 | 536.36731 | 284.56174 |
| 932.62592 | 128.85935 | 535.99799 | 284.73635 |

|           |           |           |           |
|-----------|-----------|-----------|-----------|
| 933.30377 | 128.18048 | 535.66913 | 284.76239 |
| 934.01794 | 127.53115 | 535.39331 | 284.9891  |
| 934.49933 | 126.41933 | 534.85291 | 285.09732 |
| 935.44342 | 125.96308 | 534.59302 | 285.14654 |
| 934.64966 | 124.80044 | 534.38593 | 285.34343 |
| 935.7345  | 124.01558 | 534.08826 | 285.50774 |
| 937.56335 | 123.16696 | 533.71667 | 285.51254 |
| 938.00116 | 122.41523 | 533.28729 | 285.73736 |
| 937.73914 | 121.46143 | 533.01563 | 285.7828  |
| 939.08929 | 120.53431 | 532.67987 | 285.9287  |
| 938.01154 | 119.79095 | 532.27222 | 286.02057 |
| 940.10248 | 118.87822 | 532.01746 | 286.12932 |
| 940.20862 | 118.07307 | 531.66492 | 286.26866 |
| 941.74774 | 117.17255 | 531.36096 | 286.47236 |
| 942.93396 | 116.3367  | 531.00269 | 286.51319 |
| 943.50946 | 115.16958 | 530.67719 | 286.77364 |
| 944.18622 | 114.5326  | 530.31702 | 286.77029 |
| 944.70813 | 113.64169 | 530.00018 | 286.84578 |
| 945.16498 | 112.82477 | 529.65991 | 286.91545 |
| 946.58051 | 111.99845 | 529.3822  | 287.06091 |
| 946.11761 | 110.81313 | 529.01544 | 287.25334 |
| 947.44141 | 109.94499 | 528.62128 | 287.5349  |
| 949.27081 | 108.72985 | 528.27905 | 287.59878 |
| 950.237   | 108.07332 | 527.85645 | 287.68052 |
| 949.31891 | 107.09801 | 527.57672 | 287.8179  |
| 951.34149 | 106.22894 | 527.28571 | 287.87683 |
| 951.33197 | 105.16017 | 526.91919 | 287.91187 |
| 951.98676 | 104.27982 | 526.50568 | 288.15794 |
| 952.25641 | 103.52427 | 526.21759 | 288.22417 |
| 953.39819 | 102.46796 | 525.94812 | 288.54227 |
| 953.72302 | 101.47782 | 525.54993 | 288.37345 |
| 953.11859 | 100.41698 | 525.31708 | 288.576   |
| 955.40784 | 99.42821  | 524.84393 | 288.81623 |
| 955.39148 | 98.6403   | 524.42841 | 288.84719 |
| 957.8139  | 96.84049  | 524.24194 | 288.95966 |
| 958.87201 | 95.62203  | 523.94037 | 289.12511 |
| 957.90918 | 93.49415  | 523.58411 | 289.25279 |
| 959.83472 | 90.66299  | 523.28009 | 289.41616 |
| 961.3078  | 89.77166  | 522.96954 | 289.39941 |
| 959.96307 | 88.63509  | 522.60748 | 289.52688 |
| 962.56104 | 85.6634   | 522.2713  | 289.66426 |
| 963.76483 | 83.53077  | 521.88879 | 289.89731 |
| 964.75616 | 82.71331  | 521.52545 | 289.95382 |
| 967.09955 | 80.64532  | 521.25232 | 290.12028 |
| 965.74005 | 79.72123  | 520.89227 | 290.15768 |
| 967.17328 | 78.69555  | 520.53809 | 290.36333 |
| 969.3974  | 77.74714  | 520.1889  | 290.47975 |

|           |          |           |           |
|-----------|----------|-----------|-----------|
| 972.38153 | 72.84531 | 519.84521 | 290.59983 |
| 973.57501 | 71.91663 | 519.50964 | 290.63814 |
| 971.76898 | 71.00131 | 519.17786 | 290.94576 |
| 974.4892  | 66.22391 | 518.85834 | 290.88947 |
| 975.05737 | 65.76474 | 518.50507 | 291.09651 |
| 977.90454 | 64.39645 | 518.1803  | 291.13202 |
| 977.06671 | 63.39723 | 517.84967 | 291.32511 |
| 979.30621 | 59.46957 | 517.50647 | 291.3356  |
| 979.91052 | 59.11957 | 517.16107 | 291.57391 |
| 980.24164 | 58.0387  | 516.82623 | 291.62934 |
| 982.35559 | 56.53996 | 516.49567 | 291.8467  |
| 983.39661 | 55.5471  | 516.19965 | 291.95244 |
| 983.45026 | 54.67305 | 515.81494 | 292.1394  |
| 984.30188 | 54.20694 | 515.45111 | 292.09212 |
| 983.5976  | 53.34778 | 515.14764 | 292.04136 |
| 984.58148 | 52.88523 | 514.8266  | 292.45179 |
| 985.46399 | 50.12503 | 514.48804 | 292.50312 |
| 983.57001 | 49.9829  | 514.11383 | 292.56355 |
| 983.27185 | 49.9136  | 513.83429 | 292.77203 |
| 984.30206 | 49.69212 | 513.49054 | 292.85492 |
|           |          | 513.14398 | 292.95963 |
|           |          | 512.80096 | 293.0372  |
|           |          | 512.46643 | 293.24128 |
|           |          | 512.09705 | 293.48994 |
|           |          | 511.77817 | 293.55476 |
|           |          | 511.46561 | 293.54012 |
|           |          | 511.09979 | 293.79116 |
|           |          | 510.76041 | 293.87177 |
|           |          | 510.44482 | 294.07002 |
|           |          | 510.08838 | 294.18959 |
|           |          | 509.75134 | 294.12097 |
|           |          | 509.40179 | 294.46793 |
|           |          | 509.10617 | 294.63194 |
|           |          | 508.72397 | 294.69645 |
|           |          | 508.38931 | 294.79657 |
|           |          | 508.08554 | 294.8513  |
|           |          | 507.75864 | 295.06913 |
|           |          | 507.35751 | 295.12784 |
|           |          | 507.03415 | 295.20663 |
|           |          | 506.70892 | 295.3238  |
|           |          | 506.38568 | 295.4787  |
|           |          | 506.04794 | 295.57884 |
|           |          | 505.69894 | 295.82053 |
|           |          | 505.3718  | 295.93564 |
|           |          | 505.01169 | 295.88324 |
|           |          | 504.6701  | 296.11935 |
|           |          | 504.21375 | 296.32536 |

|           |           |
|-----------|-----------|
| 503.86923 | 296.43046 |
| 503.56522 | 296.52733 |
| 503.23761 | 296.63712 |
| 502.83469 | 296.92514 |
| 502.52554 | 296.86989 |
| 502.14801 | 297.09103 |
| 501.79581 | 297.12969 |
| 501.52618 | 297.3109  |
| 501.19046 | 297.31568 |
| 500.85522 | 297.39804 |
| 500.4451  | 297.55455 |
| 500.16165 | 297.68367 |
| 499.7941  | 297.80659 |
| 499.47662 | 297.96228 |
| 499.20627 | 298.01657 |
| 498.77155 | 298.2338  |
| 498.42947 | 298.39248 |
| 498.09033 | 298.5799  |
| 497.81866 | 298.67239 |
| 497.4487  | 298.70361 |
| 497.18246 | 298.81195 |
| 496.76727 | 298.912   |
| 496.45667 | 299.10976 |
| 496.1077  | 299.23029 |
| 495.76981 | 299.26095 |
| 495.3754  | 299.38032 |
| 495.04453 | 299.56151 |
| 494.75079 | 299.72352 |
| 494.33548 | 299.68401 |
| 494.10165 | 299.86886 |
| 493.73532 | 300.06037 |
| 493.35501 | 300.23374 |
| 493.06168 | 300.30394 |
| 492.71558 | 300.42464 |
| 492.32718 | 300.52722 |
| 492.03693 | 300.60617 |
| 491.63654 | 300.80175 |
| 491.31299 | 300.9336  |
| 491.005   | 301.10082 |
| 490.65448 | 301.15217 |
| 490.3447  | 301.20641 |
| 489.9606  | 301.38243 |
| 489.61563 | 301.46714 |
| 489.30676 | 301.57916 |
| 488.99338 | 301.88779 |
| 488.64719 | 302.00751 |
| 488.27271 | 302.02339 |

|           |           |
|-----------|-----------|
| 487.95016 | 302.13907 |
| 487.59714 | 302.17152 |
| 487.30942 | 302.36631 |
| 486.93323 | 302.51629 |
| 486.59225 | 302.57376 |
| 486.2482  | 302.83034 |
| 485.93155 | 302.93409 |
| 485.59097 | 302.84016 |
| 485.24933 | 303.0513  |
| 484.93185 | 303.20869 |
| 484.53314 | 303.44012 |
| 484.24139 | 303.4286  |
| 483.88791 | 303.5766  |
| 483.58224 | 303.72225 |
| 483.24579 | 303.86478 |
| 482.87805 | 303.91449 |
| 482.53876 | 304.20549 |
| 482.19928 | 304.17577 |
| 481.84665 | 304.3281  |
| 481.55536 | 304.38295 |
| 481.19763 | 304.60502 |
| 480.85367 | 304.64774 |
| 480.52914 | 304.8848  |
| 480.18179 | 305.04031 |
| 479.83234 | 305.14513 |
| 479.53122 | 305.17652 |
| 479.18704 | 305.25762 |
| 478.80978 | 305.52254 |
| 478.51849 | 305.51823 |
| 478.17599 | 305.6868  |
| 477.80222 | 305.89873 |
| 477.45917 | 305.86343 |
| 477.19992 | 305.95881 |
| 476.78683 | 306.17987 |
| 476.51337 | 306.22164 |
| 476.13187 | 306.32709 |
| 475.75873 | 306.56835 |
| 475.4263  | 306.61367 |
| 475.07568 | 306.80021 |
| 474.75476 | 306.87111 |
| 474.43524 | 307.08694 |
| 474.12857 | 307.08656 |
| 473.77795 | 307.21948 |
| 473.37903 | 307.2795  |
| 473.06204 | 307.52534 |
| 472.71432 | 307.6141  |
| 472.37299 | 307.7349  |



|           |           |
|-----------|-----------|
| 472.09729 | 307.81337 |
| 471.71179 | 307.79331 |
| 471.40417 | 308.04937 |
| 471.07642 | 308.22367 |
| 470.66235 | 308.30463 |
| 470.35919 | 308.42609 |
| 470.06528 | 308.72329 |
| 469.70081 | 308.64669 |
| 469.36862 | 308.90667 |
| 469.02722 | 308.94554 |
| 468.62509 | 308.98383 |
| 468.36398 | 309.05359 |
| 467.98721 | 309.31164 |
| 467.66602 | 309.43475 |
| 467.29361 | 309.5461  |
| 466.95825 | 309.70757 |
| 466.62216 | 309.78976 |
| 466.31232 | 309.99295 |
| 465.97644 | 310.09521 |
| 465.67859 | 309.99892 |
| 465.33478 | 310.25709 |
| 465.04462 | 310.41662 |
| 464.6037  | 310.39311 |
| 464.2446  | 310.51424 |
| 463.90662 | 310.78981 |
| 463.62103 | 310.89444 |
| 463.28897 | 310.9272  |
| 462.88211 | 311.03285 |
| 462.62439 | 311.4321  |
| 462.26007 | 311.37065 |
| 461.91946 | 311.63903 |
| 461.61609 | 311.64417 |
| 461.2489  | 311.74235 |
| 460.87418 | 311.96852 |
| 460.59799 | 311.93916 |
| 460.22739 | 312.09331 |
| 459.94046 | 312.2845  |
| 459.54395 | 312.40476 |
| 459.23352 | 312.54224 |
| 458.88644 | 312.55074 |
| 458.5842  | 312.69081 |
| 458.24582 | 312.8362  |
| 457.87659 | 313.04865 |
| 457.56192 | 313.15861 |
| 457.19504 | 313.14903 |
| 456.88156 | 313.37363 |
| 456.5105  | 313.38399 |

|           |           |
|-----------|-----------|
| 456.15656 | 313.65021 |
| 455.87921 | 313.55324 |
| 455.46503 | 313.85718 |
| 455.21082 | 314.11168 |
| 454.85074 | 314.09526 |
| 454.49127 | 314.21793 |
| 454.12714 | 314.30147 |
| 453.83597 | 314.44438 |
| 453.48279 | 314.63527 |
| 453.12375 | 314.7101  |
| 452.77121 | 314.72142 |
| 452.52591 | 315.00059 |
| 452.09122 | 314.97672 |
| 451.78445 | 315.12889 |
| 451.48648 | 315.27545 |
| 451.10165 | 315.37106 |
| 450.73743 | 315.5579  |
| 450.47946 | 315.75054 |
| 450.12338 | 315.76695 |
| 449.79144 | 315.89863 |
| 449.40543 | 315.97279 |
| 449.09268 | 316.1514  |
| 448.74362 | 316.25441 |
| 448.40289 | 316.28369 |
| 448.04001 | 316.5409  |
| 447.73413 | 316.54924 |
| 447.41528 | 316.75673 |
| 447.08243 | 316.78419 |
| 446.77176 | 316.90712 |
| 446.45639 | 317.06645 |
| 446.06134 | 317.2104  |
| 445.70425 | 317.27656 |
| 445.36121 | 317.41677 |
| 445.05322 | 317.5254  |
| 444.7088  | 317.57908 |
| 444.38705 | 317.74604 |
| 444.06619 | 317.7795  |
| 443.71796 | 317.995   |
| 443.35287 | 318.18486 |
| 443.03958 | 318.21817 |
| 442.69879 | 318.22515 |
| 442.31052 | 318.49244 |
| 441.95239 | 318.3705  |
| 441.6684  | 318.63558 |
| 441.35345 | 318.62127 |
| 440.99347 | 318.78388 |
| 440.6463  | 318.93955 |

|           |           |
|-----------|-----------|
| 440.3244  | 319.14734 |
| 439.97049 | 319.21569 |
| 439.64838 | 319.23322 |
| 439.32513 | 319.34211 |
| 438.94843 | 319.39376 |
| 438.59473 | 319.71815 |
| 438.2645  | 319.73605 |
| 437.96924 | 319.82179 |
| 437.62546 | 319.94799 |
| 437.30157 | 320.12467 |
| 436.91714 | 320.14011 |
| 436.6059  | 320.26421 |
| 436.26453 | 320.3353  |
| 435.86847 | 320.38522 |
| 435.57498 | 320.53188 |
| 435.28452 | 320.72364 |
| 434.89148 | 320.71453 |
| 434.57938 | 320.85134 |
| 434.23032 | 320.98775 |
| 433.89774 | 321.01501 |
| 433.53522 | 321.2341  |
| 433.22366 | 321.24383 |
| 432.89432 | 321.27229 |
| 432.54868 | 321.48415 |
| 432.20233 | 321.52463 |
| 431.85748 | 321.69602 |
| 431.52081 | 321.80084 |
| 431.17548 | 321.81508 |
| 430.82617 | 322.04566 |
| 430.56628 | 322.19652 |
| 430.20413 | 322.19883 |
| 429.80545 | 322.17302 |
| 429.48877 | 322.38691 |
| 429.15036 | 322.40788 |
| 428.81482 | 322.6099  |
| 428.51535 | 322.63262 |
| 428.20935 | 322.70315 |
| 427.76862 | 322.96001 |
| 427.46335 | 322.96869 |
| 427.11237 | 322.99228 |
| 426.80829 | 323.05332 |
| 426.47122 | 323.18626 |
| 426.1153  | 323.28309 |
| 425.79871 | 323.3987  |
| 425.43286 | 323.49495 |
| 425.08163 | 323.68529 |
| 424.7735  | 323.67237 |

|           |           |
|-----------|-----------|
| 424.38419 | 323.85729 |
| 424.08011 | 323.86491 |
| 423.71158 | 324.0137  |
| 423.41476 | 324.11795 |
| 423.03781 | 324.28358 |
| 422.74017 | 324.33137 |
| 422.39517 | 324.27648 |
| 422.08673 | 324.52308 |
| 421.70474 | 324.5245  |
| 421.38953 | 324.61057 |
| 421.06152 | 324.83466 |
| 420.70203 | 324.79916 |
| 420.35791 | 324.94917 |
| 420.05829 | 324.8661  |
| 419.6647  | 325.14548 |
| 419.32504 | 325.22046 |
| 419.02002 | 325.1454  |
| 418.70389 | 325.40376 |
| 418.32327 | 325.5425  |
| 418.03186 | 325.53362 |
| 417.6423  | 325.65279 |
| 417.34702 | 325.78855 |
| 416.9794  | 325.72466 |
| 416.68338 | 325.90647 |
| 416.28452 | 326.0085  |
| 415.9136  | 326.09202 |
| 415.60611 | 326.21134 |
| 415.31888 | 326.19069 |
| 414.92535 | 326.44223 |
| 414.5451  | 326.46365 |
| 414.30161 | 326.50112 |
| 413.92529 | 326.55036 |
| 413.55124 | 326.65615 |
| 413.25815 | 326.69468 |
| 412.95801 | 326.84054 |
| 412.5946  | 327.01952 |
| 412.23743 | 327.01669 |
| 411.85364 | 327.09812 |
| 411.5946  | 327.26298 |
| 411.26682 | 327.28365 |
| 410.85147 | 327.43498 |
| 410.534   | 327.47435 |
| 410.18332 | 327.45461 |
| 409.7955  | 327.71645 |
| 409.51245 | 327.62996 |
| 409.18442 | 327.80464 |
| 408.88416 | 327.96285 |

|           |           |
|-----------|-----------|
| 408.52322 | 327.96041 |
| 408.18796 | 328.0765  |
| 407.8562  | 328.10234 |
| 407.46194 | 328.14059 |
| 407.16287 | 328.24421 |
| 406.7919  | 328.44004 |
| 406.49008 | 328.42738 |
| 406.13132 | 328.45693 |
| 405.81171 | 328.61221 |
| 405.44308 | 328.81391 |
| 405.0957  | 328.68933 |
| 404.82187 | 328.87508 |
| 404.44244 | 328.96807 |
| 404.11801 | 329.04034 |
| 403.77936 | 329.15165 |
| 403.50275 | 329.12747 |
| 403.12717 | 329.15425 |
| 402.70905 | 329.36912 |
| 402.47665 | 329.56928 |
| 402.13788 | 329.52059 |
| 401.75211 | 329.61448 |
| 401.3945  | 329.69956 |
| 401.0769  | 329.76153 |
| 400.77005 | 329.72968 |
| 400.4371  | 329.96696 |
| 400.06717 | 329.86082 |
| 399.72388 | 330.02636 |
| 399.38181 | 330.0742  |
| 399.02679 | 330.31091 |
| 398.71667 | 330.26862 |
| 398.4024  | 330.36332 |
| 398.03479 | 330.43597 |
| 397.66949 | 330.48752 |
| 397.37717 | 330.59141 |
| 397.02701 | 330.72293 |
| 396.6893  | 330.87212 |
| 396.33563 | 330.77065 |
| 395.95596 | 330.88035 |
| 395.617   | 331.06247 |
| 395.2991  | 331.09844 |
| 394.98322 | 331.24344 |
| 394.68579 | 331.17113 |
| 394.30942 | 331.26486 |
| 393.99057 | 331.38975 |
| 393.62955 | 331.30571 |
| 393.29288 | 331.47713 |
| 392.94928 | 331.64489 |

|           |           |
|-----------|-----------|
| 392.60544 | 331.6978  |
| 392.2868  | 331.75027 |
| 391.97165 | 331.85387 |
| 391.60873 | 331.83986 |
| 391.27579 | 332.07546 |
| 390.95557 | 332.01669 |
| 390.61862 | 332.11525 |
| 390.31238 | 332.07249 |
| 389.86288 | 332.39419 |
| 389.58463 | 332.29828 |
| 389.21317 | 332.46866 |
| 388.93475 | 332.4669  |
| 388.52103 | 332.54774 |
| 388.22012 | 332.78342 |
| 387.8421  | 332.66755 |
| 387.53918 | 332.81239 |
| 387.22409 | 333.01657 |
| 386.85486 | 333.05947 |
| 386.59094 | 333.06721 |
| 386.17728 | 333.16955 |
| 385.84152 | 333.17647 |
| 385.50443 | 333.28944 |
| 385.15723 | 333.30888 |
| 384.85968 | 333.47205 |
| 384.50046 | 333.55203 |
| 384.17969 | 333.51534 |
| 383.77502 | 333.4922  |
| 383.53134 | 333.77608 |
| 383.15866 | 333.94632 |
| 382.77945 | 333.67964 |
| 382.55447 | 334.03141 |
| 382.16098 | 333.98544 |
| 381.79248 | 334.08485 |
| 381.42551 | 334.16027 |
| 381.11508 | 334.16011 |
| 380.71899 | 334.20596 |
| 380.44162 | 334.42009 |
| 380.13901 | 334.39139 |
| 379.7652  | 334.51732 |
| 379.42346 | 334.50505 |
| 379.06836 | 334.66392 |
| 378.78259 | 334.6565  |
| 378.40479 | 334.81113 |
| 378.05264 | 334.79412 |
| 377.74622 | 334.8206  |
| 377.39523 | 334.94703 |
| 377.07224 | 335.12717 |

|           |           |
|-----------|-----------|
| 376.69852 | 335.15703 |
| 376.35846 | 335.21688 |
| 376.03284 | 335.25381 |
| 375.69302 | 335.27802 |
| 375.35547 | 335.51335 |
| 375.04251 | 335.4573  |
| 374.71213 | 335.48077 |
| 374.38922 | 335.69508 |
| 373.96524 | 335.6628  |
| 373.63037 | 335.73835 |
| 373.31256 | 335.83093 |
| 373.00995 | 335.94192 |
| 372.63263 | 336.014   |
| 372.2883  | 336.05509 |
| 371.9917  | 336.20778 |
| 371.62085 | 336.20888 |
| 371.26724 | 336.28169 |
| 370.95239 | 336.30764 |
| 370.63583 | 336.38173 |
| 370.31931 | 336.40371 |
| 369.95212 | 336.4897  |
| 369.61859 | 336.54969 |
| 369.24115 | 336.73448 |
| 368.96011 | 336.81779 |
| 368.5928  | 336.71601 |
| 368.2565  | 336.90125 |
| 367.93219 | 336.97738 |
| 367.58759 | 337.07415 |
| 367.2739  | 337.00085 |
| 366.90305 | 337.14422 |
| 366.59265 | 337.21678 |
| 366.23822 | 337.26591 |
| 365.89465 | 337.52115 |
| 365.60147 | 337.3851  |
| 365.24051 | 337.37293 |
| 364.82666 | 337.54963 |
| 364.52423 | 337.63236 |
| 364.20297 | 337.77591 |
| 363.8877  | 337.74908 |
| 363.53757 | 337.77563 |
| 363.15649 | 337.88879 |
| 362.88519 | 337.87358 |
| 362.50345 | 338.09267 |
| 362.1629  | 338.06021 |
| 361.83957 | 338.25478 |
| 361.47748 | 338.19823 |
| 361.17123 | 338.28459 |

|           |           |
|-----------|-----------|
| 360.82095 | 338.40945 |
| 360.4729  | 338.37518 |
| 360.1333  | 338.45504 |
| 359.81561 | 338.55794 |
| 359.51825 | 338.641   |
| 359.10626 | 338.80955 |
| 358.7807  | 338.75771 |
| 358.46606 | 338.70949 |
| 358.12262 | 338.95835 |
| 357.7355  | 338.92537 |
| 357.50156 | 339.09517 |
| 357.06226 | 339.04667 |
| 356.767   | 339.23762 |
| 356.40955 | 339.4017  |
| 356.1033  | 339.36257 |
| 355.74582 | 339.41137 |
| 355.44833 | 339.53941 |
| 355.11139 | 339.62012 |
| 354.72815 | 339.65527 |
| 354.34811 | 339.70587 |
| 354.09442 | 339.74891 |
| 353.7731  | 339.86057 |
| 353.33716 | 339.9297  |
| 353.05756 | 340.03362 |
| 352.69333 | 340.08157 |
| 352.31885 | 340.12827 |
| 351.96698 | 340.23903 |
| 351.73657 | 340.3147  |
| 351.32822 | 340.39946 |
| 351.02127 | 340.42317 |
| 350.71579 | 340.47936 |
| 350.33231 | 340.56983 |
| 350.05273 | 340.62155 |
| 350.00513 | 340.73565 |
| 350.00906 | 340.64183 |
| 350.01147 | 340.78104 |



**Figure 5**

| Tzfc     | Mzfc     | Tfc      | Mfc      |
|----------|----------|----------|----------|
| 5.45258  | 1.60E-04 | 4.58565  | 1.87E-04 |
| 6.13603  | 1.60E-04 | 5.27315  | 1.87E-04 |
| 6.81948  | 1.60E-04 | 5.96064  | 1.87E-04 |
| 7.50294  | 1.60E-04 | 6.64814  | 1.86E-04 |
| 8.18639  | 1.60E-04 | 7.33564  | 1.86E-04 |
| 8.86984  | 1.60E-04 | 8.02314  | 1.86E-04 |
| 9.55329  | 1.60E-04 | 8.71063  | 1.85E-04 |
| 10.23675 | 1.61E-04 | 9.39813  | 1.85E-04 |
| 10.9202  | 1.61E-04 | 10.08563 | 1.85E-04 |
| 11.60365 | 1.61E-04 | 10.77313 | 1.85E-04 |
| 12.2871  | 1.61E-04 | 11.46062 | 1.84E-04 |
| 12.97055 | 1.61E-04 | 12.14812 | 1.84E-04 |
| 13.65401 | 1.61E-04 | 12.83562 | 1.84E-04 |
| 14.33746 | 1.61E-04 | 13.52312 | 1.84E-04 |
| 15.02091 | 1.61E-04 | 14.21061 | 1.84E-04 |
| 15.70436 | 1.61E-04 | 14.89811 | 1.84E-04 |
| 16.38782 | 1.62E-04 | 15.58561 | 1.83E-04 |
| 17.07127 | 1.62E-04 | 16.27311 | 1.83E-04 |
| 17.75472 | 1.62E-04 | 16.9606  | 1.83E-04 |
| 18.43817 | 1.62E-04 | 17.6481  | 1.83E-04 |
| 19.12162 | 1.62E-04 | 18.3356  | 1.83E-04 |
| 19.80508 | 1.62E-04 | 19.0231  | 1.83E-04 |
| 20.48853 | 1.62E-04 | 19.71059 | 1.83E-04 |
| 21.17198 | 1.62E-04 | 20.39809 | 1.83E-04 |
| 21.85543 | 1.62E-04 | 21.08559 | 1.83E-04 |
| 22.53889 | 1.63E-04 | 21.77309 | 1.83E-04 |
| 23.22234 | 1.63E-04 | 22.46058 | 1.83E-04 |
| 23.90579 | 1.63E-04 | 23.14808 | 1.82E-04 |
| 24.58924 | 1.63E-04 | 23.83558 | 1.82E-04 |
| 25.27269 | 1.63E-04 | 24.52308 | 1.82E-04 |
| 25.95615 | 1.63E-04 | 25.21057 | 1.82E-04 |
| 26.6396  | 1.63E-04 | 25.89807 | 1.82E-04 |
| 27.32305 | 1.63E-04 | 26.58557 | 1.82E-04 |
| 28.0065  | 1.63E-04 | 27.27306 | 1.82E-04 |
| 28.68995 | 1.64E-04 | 27.96056 | 1.82E-04 |
| 29.37341 | 1.64E-04 | 28.64806 | 1.81E-04 |
| 30.05686 | 1.64E-04 | 29.33556 | 1.81E-04 |
| 30.74031 | 1.64E-04 | 30.02305 | 1.81E-04 |
| 31.42376 | 1.64E-04 | 30.71055 | 1.81E-04 |
| 32.10722 | 1.64E-04 | 31.39805 | 1.81E-04 |
| 32.79067 | 1.64E-04 | 32.08555 | 1.81E-04 |
| 33.47412 | 1.64E-04 | 32.77304 | 1.81E-04 |
| 34.15757 | 1.64E-04 | 33.46054 | 1.80E-04 |
| 34.84102 | 1.65E-04 | 34.14804 | 1.80E-04 |
| 35.52448 | 1.65E-04 | 34.83554 | 1.80E-04 |

|          |          |          |          |
|----------|----------|----------|----------|
| 36.20793 | 1.65E-04 | 35.52303 | 1.80E-04 |
| 36.89138 | 1.65E-04 | 36.21053 | 1.80E-04 |
| 37.57483 | 1.65E-04 | 36.89803 | 1.79E-04 |
| 38.25829 | 1.65E-04 | 37.58553 | 1.79E-04 |
| 38.94174 | 1.65E-04 | 38.27302 | 1.79E-04 |
| 39.62519 | 1.65E-04 | 38.96052 | 1.79E-04 |
| 40.30864 | 1.65E-04 | 39.64802 | 1.79E-04 |
| 40.99209 | 1.65E-04 | 40.33552 | 1.79E-04 |
| 41.67555 | 1.65E-04 | 41.02301 | 1.79E-04 |
| 42.359   | 1.65E-04 | 41.71051 | 1.78E-04 |
| 43.04245 | 1.65E-04 | 42.39801 | 1.78E-04 |
| 43.7259  | 1.65E-04 | 43.08551 | 1.78E-04 |
| 44.40936 | 1.65E-04 | 43.773   | 1.78E-04 |
| 45.09281 | 1.65E-04 | 44.4605  | 1.78E-04 |
| 45.77626 | 1.65E-04 | 45.148   | 1.78E-04 |
| 46.45971 | 1.65E-04 | 45.83549 | 1.77E-04 |
| 47.14316 | 1.65E-04 | 46.52299 | 1.77E-04 |
| 47.82662 | 1.65E-04 | 47.21049 | 1.77E-04 |
| 48.51007 | 1.65E-04 | 47.89799 | 1.77E-04 |
| 49.19352 | 1.65E-04 | 48.58548 | 1.77E-04 |
| 49.87697 | 1.64E-04 | 49.27298 | 1.76E-04 |
| 50.56043 | 1.64E-04 | 49.96048 | 1.76E-04 |
| 51.24388 | 1.64E-04 | 50.64798 | 1.76E-04 |
| 51.92733 | 1.64E-04 | 51.33547 | 1.76E-04 |
| 52.61078 | 1.64E-04 | 52.02297 | 1.75E-04 |
| 53.29423 | 1.64E-04 | 52.71047 | 1.75E-04 |
| 53.97769 | 1.64E-04 | 53.39797 | 1.75E-04 |
| 54.66114 | 1.64E-04 | 54.08546 | 1.75E-04 |
| 55.34459 | 1.63E-04 | 54.77296 | 1.74E-04 |
| 56.02804 | 1.63E-04 | 55.46046 | 1.74E-04 |
| 56.7115  | 1.63E-04 | 56.14796 | 1.74E-04 |
| 57.39495 | 1.63E-04 | 56.83545 | 1.74E-04 |
| 58.0784  | 1.63E-04 | 57.52295 | 1.74E-04 |
| 58.76185 | 1.63E-04 | 58.21045 | 1.73E-04 |
| 59.4453  | 1.62E-04 | 58.89795 | 1.73E-04 |
| 60.12876 | 1.62E-04 | 59.58544 | 1.73E-04 |
| 60.81221 | 1.62E-04 | 60.27294 | 1.72E-04 |
| 61.49566 | 1.62E-04 | 60.96044 | 1.72E-04 |
| 62.17911 | 1.61E-04 | 61.64794 | 1.72E-04 |
| 62.86257 | 1.61E-04 | 62.33543 | 1.71E-04 |
| 63.54602 | 1.61E-04 | 63.02293 | 1.71E-04 |
| 64.22947 | 1.61E-04 | 63.71043 | 1.71E-04 |
| 64.91292 | 1.60E-04 | 64.39793 | 1.71E-04 |
| 65.59637 | 1.60E-04 | 65.08542 | 1.70E-04 |
| 66.27983 | 1.60E-04 | 65.77292 | 1.70E-04 |
| 66.96328 | 1.60E-04 | 66.46042 | 1.70E-04 |
| 67.64673 | 1.60E-04 | 67.14791 | 1.69E-04 |

|          |          |          |          |
|----------|----------|----------|----------|
| 68.33018 | 1.59E-04 | 67.83541 | 1.69E-04 |
| 69.01364 | 1.59E-04 | 68.52291 | 1.69E-04 |
| 69.69709 | 1.59E-04 | 69.21041 | 1.68E-04 |
| 70.38054 | 1.59E-04 | 69.8979  | 1.68E-04 |
| 71.06399 | 1.58E-04 | 70.5854  | 1.67E-04 |
| 71.74744 | 1.58E-04 | 71.2729  | 1.67E-04 |
| 72.4309  | 1.58E-04 | 71.9604  | 1.67E-04 |
| 73.11435 | 1.58E-04 | 72.64789 | 1.66E-04 |
| 73.7978  | 1.57E-04 | 73.33539 | 1.66E-04 |
| 74.48125 | 1.57E-04 | 74.02289 | 1.66E-04 |
| 75.1647  | 1.57E-04 | 74.71039 | 1.66E-04 |
| 75.84816 | 1.57E-04 | 75.39788 | 1.65E-04 |
| 76.53161 | 1.56E-04 | 76.08538 | 1.65E-04 |
| 77.21506 | 1.56E-04 | 76.77288 | 1.65E-04 |
| 77.89851 | 1.56E-04 | 77.46038 | 1.64E-04 |
| 78.58197 | 1.56E-04 | 78.14787 | 1.64E-04 |
| 79.26542 | 1.55E-04 | 78.83537 | 1.64E-04 |
| 79.94887 | 1.55E-04 | 79.52287 | 1.64E-04 |
| 80.63232 | 1.55E-04 | 80.21037 | 1.63E-04 |
| 81.31577 | 1.54E-04 | 80.89786 | 1.63E-04 |
| 81.99923 | 1.54E-04 | 81.58536 | 1.63E-04 |
| 82.68268 | 1.54E-04 | 82.27286 | 1.63E-04 |
| 83.36613 | 1.54E-04 | 82.96036 | 1.62E-04 |
| 84.04958 | 1.54E-04 | 83.64785 | 1.62E-04 |
| 84.73304 | 1.53E-04 | 84.33535 | 1.62E-04 |
| 85.41649 | 1.53E-04 | 85.02285 | 1.62E-04 |
| 86.09994 | 1.53E-04 | 85.71034 | 1.61E-04 |
| 86.78339 | 1.53E-04 | 86.39784 | 1.61E-04 |
| 87.46684 | 1.53E-04 | 87.08534 | 1.61E-04 |
| 88.1503  | 1.52E-04 | 87.77284 | 1.60E-04 |
| 88.83375 | 1.52E-04 | 88.46033 | 1.60E-04 |
| 89.5172  | 1.52E-04 | 89.14783 | 1.60E-04 |
| 90.20065 | 1.51E-04 | 89.83533 | 1.59E-04 |
| 90.88411 | 1.51E-04 | 90.52283 | 1.59E-04 |
| 91.56756 | 1.51E-04 | 91.21032 | 1.59E-04 |
| 92.25101 | 1.51E-04 | 91.89782 | 1.58E-04 |
| 92.93446 | 1.50E-04 | 92.58532 | 1.58E-04 |
| 93.61791 | 1.50E-04 | 93.27282 | 1.58E-04 |
| 94.30137 | 1.50E-04 | 93.96031 | 1.57E-04 |
| 94.98482 | 1.50E-04 | 94.64781 | 1.57E-04 |
| 95.66827 | 1.49E-04 | 95.33531 | 1.57E-04 |
| 96.35172 | 1.49E-04 | 96.02281 | 1.56E-04 |
| 97.03518 | 1.49E-04 | 96.7103  | 1.56E-04 |
| 97.71863 | 1.49E-04 | 97.3978  | 1.56E-04 |
| 98.40208 | 1.48E-04 | 98.0853  | 1.56E-04 |
| 99.08553 | 1.48E-04 | 98.7728  | 1.55E-04 |
| 99.76898 | 1.48E-04 | 99.46029 | 1.55E-04 |

|           |          |           |          |
|-----------|----------|-----------|----------|
| 100.45244 | 1.48E-04 | 100.14779 | 1.55E-04 |
| 101.13589 | 1.47E-04 | 100.83529 | 1.55E-04 |
| 101.81934 | 1.47E-04 | 101.52279 | 1.54E-04 |
| 102.50279 | 1.47E-04 | 102.21028 | 1.54E-04 |
| 103.18625 | 1.47E-04 | 102.89778 | 1.54E-04 |
| 103.8697  | 1.46E-04 | 103.58528 | 1.54E-04 |
| 104.55315 | 1.46E-04 | 104.27278 | 1.53E-04 |
| 105.2366  | 1.46E-04 | 104.96027 | 1.53E-04 |
| 105.92005 | 1.46E-04 | 105.64777 | 1.53E-04 |
| 106.60351 | 1.45E-04 | 106.33527 | 1.53E-04 |
| 107.28696 | 1.45E-04 | 107.02276 | 1.52E-04 |
| 107.97041 | 1.45E-04 | 107.71026 | 1.52E-04 |
| 108.65386 | 1.45E-04 | 108.39776 | 1.52E-04 |
| 109.33732 | 1.45E-04 | 109.08526 | 1.52E-04 |
| 110.02077 | 1.44E-04 | 109.77275 | 1.52E-04 |
| 110.70422 | 1.44E-04 | 110.46025 | 1.51E-04 |
| 111.38767 | 1.44E-04 | 111.14775 | 1.51E-04 |
| 112.07112 | 1.44E-04 | 111.83525 | 1.51E-04 |
| 112.75458 | 1.44E-04 | 112.52274 | 1.51E-04 |
| 113.43803 | 1.43E-04 | 113.21024 | 1.50E-04 |
| 114.12148 | 1.43E-04 | 113.89774 | 1.50E-04 |
| 114.80493 | 1.43E-04 | 114.58524 | 1.50E-04 |
| 115.48838 | 1.43E-04 | 115.27273 | 1.50E-04 |
| 116.17184 | 1.43E-04 | 115.96023 | 1.49E-04 |
| 116.85529 | 1.42E-04 | 116.64773 | 1.49E-04 |
| 117.53874 | 1.42E-04 | 117.33523 | 1.49E-04 |
| 118.22219 | 1.42E-04 | 118.02272 | 1.48E-04 |
| 118.90565 | 1.42E-04 | 118.71022 | 1.48E-04 |
| 119.5891  | 1.42E-04 | 119.39772 | 1.48E-04 |
| 120.27255 | 1.41E-04 | 120.08522 | 1.48E-04 |
| 120.956   | 1.41E-04 | 120.77271 | 1.47E-04 |
| 121.63945 | 1.41E-04 | 121.46021 | 1.47E-04 |
| 122.32291 | 1.41E-04 | 122.14771 | 1.47E-04 |
| 123.00636 | 1.40E-04 | 122.83521 | 1.47E-04 |
| 123.68981 | 1.40E-04 | 123.5227  | 1.47E-04 |
| 124.37326 | 1.40E-04 | 124.2102  | 1.46E-04 |
| 125.05672 | 1.40E-04 | 124.8977  | 1.46E-04 |
| 125.74017 | 1.40E-04 | 125.5852  | 1.46E-04 |
| 126.42362 | 1.39E-04 | 126.27269 | 1.46E-04 |
| 127.10707 | 1.39E-04 | 126.96019 | 1.46E-04 |
| 127.79052 | 1.39E-04 | 127.64769 | 1.45E-04 |
| 128.47398 | 1.39E-04 | 128.33518 | 1.45E-04 |
| 129.15743 | 1.39E-04 | 129.02268 | 1.45E-04 |
| 129.84088 | 1.38E-04 | 129.71018 | 1.45E-04 |
| 130.52433 | 1.38E-04 | 130.39768 | 1.45E-04 |
| 131.20779 | 1.38E-04 | 131.08517 | 1.44E-04 |
| 131.89124 | 1.38E-04 | 131.77267 | 1.44E-04 |

|           |          |           |          |
|-----------|----------|-----------|----------|
| 132.57469 | 1.38E-04 | 132.46017 | 1.44E-04 |
| 133.25814 | 1.37E-04 | 133.14767 | 1.44E-04 |
| 133.94159 | 1.37E-04 | 133.83516 | 1.43E-04 |
| 134.62505 | 1.37E-04 | 134.52266 | 1.43E-04 |
| 135.3085  | 1.37E-04 | 135.21016 | 1.43E-04 |
| 135.99195 | 1.37E-04 | 135.89766 | 1.43E-04 |
| 136.6754  | 1.37E-04 | 136.58515 | 1.42E-04 |
| 137.35886 | 1.36E-04 | 137.27265 | 1.42E-04 |
| 138.04231 | 1.36E-04 | 137.96015 | 1.42E-04 |
| 138.72576 | 1.36E-04 | 138.64765 | 1.42E-04 |
| 139.40921 | 1.36E-04 | 139.33514 | 1.41E-04 |
| 140.09266 | 1.36E-04 | 140.02264 | 1.41E-04 |
| 140.77612 | 1.36E-04 | 140.71014 | 1.41E-04 |
| 141.45957 | 1.35E-04 | 141.39764 | 1.41E-04 |
| 142.14302 | 1.35E-04 | 142.08513 | 1.40E-04 |
| 142.82647 | 1.35E-04 | 142.77263 | 1.40E-04 |
| 143.50993 | 1.35E-04 | 143.46013 | 1.40E-04 |
| 144.19338 | 1.35E-04 | 144.14763 | 1.40E-04 |
| 144.87683 | 1.35E-04 | 144.83512 | 1.40E-04 |
| 145.56028 | 1.34E-04 | 145.52262 | 1.39E-04 |
| 146.24373 | 1.34E-04 | 146.21012 | 1.39E-04 |
| 146.92719 | 1.34E-04 | 146.89761 | 1.39E-04 |
| 147.61064 | 1.34E-04 | 147.58511 | 1.39E-04 |
| 148.29409 | 1.34E-04 | 148.27261 | 1.39E-04 |
| 148.97754 | 1.34E-04 | 148.96011 | 1.38E-04 |
| 149.661   | 1.33E-04 | 149.6476  | 1.38E-04 |
| 150.34445 | 1.33E-04 | 150.3351  | 1.38E-04 |
| 151.0279  | 1.33E-04 | 151.0226  | 1.38E-04 |
| 151.71135 | 1.33E-04 | 151.7101  | 1.37E-04 |
| 152.3948  | 1.33E-04 | 152.39759 | 1.37E-04 |
| 153.07826 | 1.33E-04 | 153.08509 | 1.37E-04 |
| 153.76171 | 1.32E-04 | 153.77259 | 1.37E-04 |
| 154.44516 | 1.32E-04 | 154.46009 | 1.37E-04 |
| 155.12861 | 1.32E-04 | 155.14758 | 1.36E-04 |
| 155.81206 | 1.32E-04 | 155.83508 | 1.36E-04 |
| 156.49552 | 1.32E-04 | 156.52258 | 1.36E-04 |
| 157.17897 | 1.32E-04 | 157.21008 | 1.36E-04 |
| 157.86242 | 1.31E-04 | 157.89757 | 1.36E-04 |
| 158.54587 | 1.31E-04 | 158.58507 | 1.35E-04 |
| 159.22933 | 1.31E-04 | 159.27257 | 1.35E-04 |
| 159.91278 | 1.31E-04 | 159.96007 | 1.35E-04 |
| 160.59623 | 1.31E-04 | 160.64756 | 1.35E-04 |
| 161.27968 | 1.31E-04 | 161.33506 | 1.35E-04 |
| 161.96313 | 1.30E-04 | 162.02256 | 1.34E-04 |
| 162.64659 | 1.30E-04 | 162.71006 | 1.34E-04 |
| 163.33004 | 1.30E-04 | 163.39755 | 1.34E-04 |
| 164.01349 | 1.30E-04 | 164.08505 | 1.34E-04 |

|           |          |           |          |
|-----------|----------|-----------|----------|
| 164.69694 | 1.30E-04 | 164.77255 | 1.34E-04 |
| 165.3804  | 1.30E-04 | 165.46005 | 1.34E-04 |
| 166.06385 | 1.29E-04 | 166.14754 | 1.34E-04 |
| 166.7473  | 1.29E-04 | 166.83504 | 1.33E-04 |
| 167.43075 | 1.29E-04 | 167.52254 | 1.33E-04 |
| 168.1142  | 1.29E-04 | 168.21003 | 1.33E-04 |
| 168.79766 | 1.29E-04 | 168.89753 | 1.33E-04 |
| 169.48111 | 1.29E-04 | 169.58503 | 1.33E-04 |
| 170.16456 | 1.28E-04 | 170.27253 | 1.33E-04 |
| 170.84801 | 1.28E-04 | 170.96002 | 1.32E-04 |
| 171.53147 | 1.28E-04 | 171.64752 | 1.32E-04 |
| 172.21492 | 1.28E-04 | 172.33502 | 1.32E-04 |
| 172.89837 | 1.28E-04 | 173.02252 | 1.32E-04 |
| 173.58182 | 1.28E-04 | 173.71001 | 1.32E-04 |
| 174.26527 | 1.28E-04 | 174.39751 | 1.32E-04 |
| 174.94873 | 1.27E-04 | 175.08501 | 1.31E-04 |
| 175.63218 | 1.27E-04 | 175.77251 | 1.31E-04 |
| 176.31563 | 1.27E-04 | 176.46    | 1.31E-04 |
| 176.99908 | 1.27E-04 | 177.1475  | 1.31E-04 |
| 177.68254 | 1.27E-04 | 177.835   | 1.31E-04 |
| 178.36599 | 1.27E-04 | 178.5225  | 1.31E-04 |
| 179.04944 | 1.27E-04 | 179.20999 | 1.30E-04 |
| 179.73289 | 1.26E-04 | 179.89749 | 1.30E-04 |
| 180.41634 | 1.26E-04 | 180.58499 | 1.30E-04 |
| 181.0998  | 1.26E-04 | 181.27249 | 1.30E-04 |
| 181.78325 | 1.26E-04 | 181.95998 | 1.30E-04 |
| 182.4667  | 1.26E-04 | 182.64748 | 1.30E-04 |
| 183.15015 | 1.26E-04 | 183.33498 | 1.30E-04 |
| 183.83361 | 1.26E-04 | 184.02248 | 1.29E-04 |
| 184.51706 | 1.25E-04 | 184.70997 | 1.29E-04 |
| 185.20051 | 1.25E-04 | 185.39747 | 1.29E-04 |
| 185.88396 | 1.25E-04 | 186.08497 | 1.29E-04 |
| 186.56741 | 1.25E-04 | 186.77246 | 1.29E-04 |
| 187.25087 | 1.25E-04 | 187.45996 | 1.29E-04 |
| 187.93432 | 1.25E-04 | 188.14746 | 1.28E-04 |
| 188.61777 | 1.25E-04 | 188.83496 | 1.28E-04 |
| 189.30122 | 1.24E-04 | 189.52245 | 1.28E-04 |
| 189.98468 | 1.24E-04 | 190.20995 | 1.28E-04 |
| 190.66813 | 1.24E-04 | 190.89745 | 1.28E-04 |
| 191.35158 | 1.24E-04 | 191.58495 | 1.28E-04 |
| 192.03503 | 1.24E-04 | 192.27244 | 1.27E-04 |
| 192.71848 | 1.24E-04 | 192.95994 | 1.27E-04 |
| 193.40194 | 1.24E-04 | 193.64744 | 1.27E-04 |
| 194.08539 | 1.23E-04 | 194.33494 | 1.27E-04 |
| 194.76884 | 1.23E-04 | 195.02243 | 1.27E-04 |
| 195.45229 | 1.23E-04 | 195.70993 | 1.27E-04 |
| 196.13575 | 1.23E-04 | 196.39743 | 1.27E-04 |

|           |          |           |          |
|-----------|----------|-----------|----------|
| 196.8192  | 1.23E-04 | 197.08493 | 1.26E-04 |
| 197.50265 | 1.23E-04 | 197.77242 | 1.26E-04 |
| 198.1861  | 1.23E-04 | 198.45992 | 1.26E-04 |
| 198.86955 | 1.22E-04 | 199.14742 | 1.26E-04 |
| 199.55301 | 1.22E-04 | 199.83492 | 1.26E-04 |
| 200.23646 | 1.22E-04 | 200.52241 | 1.26E-04 |
| 200.91991 | 1.22E-04 | 201.20991 | 1.26E-04 |
| 201.60336 | 1.22E-04 | 201.89741 | 1.26E-04 |
| 202.28681 | 1.22E-04 | 202.58491 | 1.25E-04 |
| 202.97027 | 1.22E-04 | 203.2724  | 1.25E-04 |
| 203.65372 | 1.21E-04 | 203.9599  | 1.25E-04 |
| 204.33717 | 1.21E-04 | 204.6474  | 1.25E-04 |
| 205.02062 | 1.21E-04 | 205.3349  | 1.25E-04 |
| 205.70408 | 1.21E-04 | 206.02239 | 1.25E-04 |
| 206.38753 | 1.21E-04 | 206.70989 | 1.25E-04 |
| 207.07098 | 1.21E-04 | 207.39739 | 1.24E-04 |
| 207.75443 | 1.21E-04 | 208.08488 | 1.24E-04 |
| 208.43788 | 1.20E-04 | 208.77238 | 1.24E-04 |
| 209.12134 | 1.20E-04 | 209.45988 | 1.24E-04 |
| 209.80479 | 1.20E-04 | 210.14738 | 1.24E-04 |
| 210.48824 | 1.20E-04 | 210.83487 | 1.24E-04 |
| 211.17169 | 1.20E-04 | 211.52237 | 1.23E-04 |
| 211.85515 | 1.20E-04 | 212.20987 | 1.23E-04 |
| 212.5386  | 1.20E-04 | 212.89737 | 1.23E-04 |
| 213.22205 | 1.20E-04 | 213.58486 | 1.23E-04 |
| 213.9055  | 1.20E-04 | 214.27236 | 1.23E-04 |
| 214.58895 | 1.19E-04 | 214.95986 | 1.23E-04 |
| 215.27241 | 1.19E-04 | 215.64736 | 1.23E-04 |
| 215.95586 | 1.19E-04 | 216.33485 | 1.22E-04 |
| 216.63931 | 1.19E-04 | 217.02235 | 1.22E-04 |
| 217.32276 | 1.19E-04 | 217.70985 | 1.22E-04 |
| 218.00622 | 1.19E-04 | 218.39735 | 1.22E-04 |
| 218.68967 | 1.19E-04 | 219.08484 | 1.22E-04 |
| 219.37312 | 1.19E-04 | 219.77234 | 1.22E-04 |
| 220.05657 | 1.19E-04 | 220.45984 | 1.22E-04 |
| 220.74002 | 1.18E-04 | 221.14734 | 1.21E-04 |
| 221.42348 | 1.18E-04 | 221.83483 | 1.21E-04 |
| 222.10693 | 1.18E-04 | 222.52233 | 1.21E-04 |
| 222.79038 | 1.18E-04 | 223.20983 | 1.21E-04 |
| 223.47383 | 1.18E-04 | 223.89733 | 1.21E-04 |
| 224.15729 | 1.18E-04 | 224.58482 | 1.21E-04 |
| 224.84074 | 1.18E-04 | 225.27232 | 1.21E-04 |
| 225.52419 | 1.18E-04 | 225.95982 | 1.20E-04 |
| 226.20764 | 1.18E-04 | 226.64731 | 1.20E-04 |
| 226.89109 | 1.18E-04 | 227.33481 | 1.20E-04 |
| 227.57455 | 1.17E-04 | 228.02231 | 1.20E-04 |
| 228.258   | 1.17E-04 | 228.70981 | 1.20E-04 |

|           |          |           |          |
|-----------|----------|-----------|----------|
| 228.94145 | 1.17E-04 | 229.3973  | 1.20E-04 |
| 229.6249  | 1.17E-04 | 230.0848  | 1.20E-04 |
| 230.30836 | 1.17E-04 | 230.7723  | 1.20E-04 |
| 230.99181 | 1.17E-04 | 231.4598  | 1.19E-04 |
| 231.67526 | 1.17E-04 | 232.14729 | 1.19E-04 |
| 232.35871 | 1.17E-04 | 232.83479 | 1.19E-04 |
| 233.04216 | 1.17E-04 | 233.52229 | 1.19E-04 |
| 233.72562 | 1.17E-04 | 234.20979 | 1.19E-04 |
| 234.40907 | 1.16E-04 | 234.89728 | 1.19E-04 |
| 235.09252 | 1.16E-04 | 235.58478 | 1.19E-04 |
| 235.77597 | 1.16E-04 | 236.27228 | 1.19E-04 |
| 236.45943 | 1.16E-04 | 236.95978 | 1.18E-04 |
| 237.14288 | 1.16E-04 | 237.64727 | 1.18E-04 |
| 237.82633 | 1.16E-04 | 238.33477 | 1.18E-04 |
| 238.50978 | 1.16E-04 | 239.02227 | 1.18E-04 |
| 239.19323 | 1.16E-04 | 239.70977 | 1.18E-04 |
| 239.87669 | 1.16E-04 | 240.39726 | 1.18E-04 |
| 240.56014 | 1.16E-04 | 241.08476 | 1.18E-04 |
| 241.24359 | 1.15E-04 | 241.77226 | 1.17E-04 |
| 241.92704 | 1.15E-04 | 242.45976 | 1.17E-04 |
| 242.61049 | 1.15E-04 | 243.14725 | 1.17E-04 |
| 243.29395 | 1.15E-04 | 243.83475 | 1.17E-04 |
| 243.9774  | 1.15E-04 | 244.52225 | 1.17E-04 |
| 244.66085 | 1.15E-04 | 245.20975 | 1.17E-04 |
| 245.3443  | 1.15E-04 | 245.89724 | 1.17E-04 |
| 246.02776 | 1.15E-04 | 246.58474 | 1.16E-04 |
| 246.71121 | 1.15E-04 | 247.27224 | 1.16E-04 |
| 247.39466 | 1.15E-04 | 247.95973 | 1.16E-04 |
| 248.07811 | 1.14E-04 | 248.64723 | 1.16E-04 |
| 248.76156 | 1.14E-04 | 249.33473 | 1.16E-04 |
| 249.44502 | 1.14E-04 | 250.02223 | 1.16E-04 |
| 250.12847 | 1.14E-04 | 250.70972 | 1.16E-04 |
| 250.81192 | 1.14E-04 | 251.39722 | 1.16E-04 |
| 251.49537 | 1.14E-04 | 252.08472 | 1.16E-04 |
| 252.17883 | 1.14E-04 | 252.77222 | 1.15E-04 |
| 252.86228 | 1.14E-04 | 253.45971 | 1.15E-04 |
| 253.54573 | 1.14E-04 | 254.14721 | 1.15E-04 |
| 254.22918 | 1.14E-04 | 254.83471 | 1.15E-04 |
| 254.91263 | 1.13E-04 | 255.52221 | 1.15E-04 |
| 255.59609 | 1.13E-04 | 256.2097  | 1.15E-04 |
| 256.27954 | 1.13E-04 | 256.8972  | 1.15E-04 |
| 256.96299 | 1.13E-04 | 257.5847  | 1.15E-04 |
| 257.64644 | 1.13E-04 | 258.2722  | 1.15E-04 |
| 258.3299  | 1.13E-04 | 258.95969 | 1.14E-04 |
| 259.01335 | 1.13E-04 | 259.64719 | 1.14E-04 |
| 259.6968  | 1.13E-04 | 260.33469 | 1.14E-04 |
| 260.38025 | 1.13E-04 | 261.02219 | 1.14E-04 |



|           |          |           |          |
|-----------|----------|-----------|----------|
| 261.0637  | 1.13E-04 | 261.70968 | 1.14E-04 |
| 261.74716 | 1.12E-04 | 262.39718 | 1.14E-04 |
| 262.43061 | 1.12E-04 | 263.08468 | 1.14E-04 |
| 263.11406 | 1.12E-04 | 263.77218 | 1.14E-04 |
| 263.79751 | 1.12E-04 | 264.45967 | 1.14E-04 |
| 264.48097 | 1.12E-04 | 265.14717 | 1.14E-04 |
| 265.16442 | 1.12E-04 | 265.83467 | 1.13E-04 |
| 265.84787 | 1.12E-04 | 266.52217 | 1.13E-04 |
| 266.53132 | 1.12E-04 | 267.20966 | 1.13E-04 |
| 267.21477 | 1.12E-04 | 267.89716 | 1.13E-04 |
| 267.89823 | 1.12E-04 | 268.58466 | 1.13E-04 |
| 268.58168 | 1.12E-04 | 269.27215 | 1.13E-04 |
| 269.26513 | 1.11E-04 | 269.95965 | 1.13E-04 |
| 269.94858 | 1.11E-04 | 270.64715 | 1.13E-04 |
| 270.63204 | 1.11E-04 | 271.33465 | 1.12E-04 |
| 271.31549 | 1.11E-04 | 272.02214 | 1.12E-04 |
| 271.99894 | 1.11E-04 | 272.70964 | 1.12E-04 |
| 272.68239 | 1.11E-04 | 273.39714 | 1.12E-04 |
| 273.36584 | 1.11E-04 | 274.08464 | 1.12E-04 |
| 274.0493  | 1.11E-04 | 274.77213 | 1.12E-04 |
| 274.73275 | 1.11E-04 | 275.45963 | 1.12E-04 |
| 275.4162  | 1.11E-04 | 276.14713 | 1.12E-04 |
| 276.09965 | 1.11E-04 | 276.83463 | 1.11E-04 |
| 276.78311 | 1.10E-04 | 277.52212 | 1.11E-04 |
| 277.46656 | 1.10E-04 | 278.20962 | 1.11E-04 |
| 278.15001 | 1.10E-04 | 278.89712 | 1.11E-04 |
| 278.83346 | 1.10E-04 | 279.58462 | 1.11E-04 |
| 279.51691 | 1.10E-04 | 280.27211 | 1.11E-04 |
| 280.20037 | 1.10E-04 | 280.95961 | 1.11E-04 |
| 280.88382 | 1.10E-04 | 281.64711 | 1.11E-04 |
| 281.56727 | 1.10E-04 | 282.33461 | 1.11E-04 |
| 282.25072 | 1.10E-04 | 283.0221  | 1.11E-04 |
| 282.93417 | 1.10E-04 | 283.7096  | 1.11E-04 |
| 283.61763 | 1.10E-04 | 284.3971  | 1.10E-04 |
| 284.30108 | 1.09E-04 | 285.0846  | 1.10E-04 |
| 284.98453 | 1.09E-04 | 285.77209 | 1.10E-04 |
| 285.66798 | 1.09E-04 | 286.45959 | 1.10E-04 |
| 286.35144 | 1.09E-04 | 287.14709 | 1.10E-04 |
| 287.03489 | 1.09E-04 | 287.83458 | 1.10E-04 |
| 287.71834 | 1.09E-04 | 288.52208 | 1.10E-04 |
| 288.40179 | 1.09E-04 | 289.20958 | 1.10E-04 |
| 289.08524 | 1.09E-04 | 289.89708 | 1.10E-04 |
| 289.7687  | 1.09E-04 | 290.58457 | 1.10E-04 |
| 290.45215 | 1.09E-04 | 291.27207 | 1.10E-04 |
| 291.1356  | 1.09E-04 | 291.95957 | 1.10E-04 |
| 291.81905 | 1.09E-04 | 292.64707 | 1.09E-04 |
| 292.50251 | 1.08E-04 | 293.33456 | 1.09E-04 |

|           |          |           |          |
|-----------|----------|-----------|----------|
| 293.18596 | 1.08E-04 | 294.02206 | 1.09E-04 |
| 293.86941 | 1.08E-04 | 294.70956 | 1.09E-04 |
| 294.55286 | 1.08E-04 | 295.39706 | 1.09E-04 |
| 295.23631 | 1.08E-04 | 296.08455 | 1.09E-04 |
| 295.91977 | 1.08E-04 | 296.77205 | 1.09E-04 |
| 296.60322 | 1.08E-04 | 297.45955 | 1.09E-04 |
| 297.28667 | 1.08E-04 | 298.14705 | 1.09E-04 |
| 297.97012 | 1.08E-04 | 298.83454 | 1.09E-04 |
| 298.65358 | 1.08E-04 | 299.52204 | 1.09E-04 |
| 299.33703 | 1.08E-04 | 300.20954 | 1.09E-04 |
| 300.02048 | 1.08E-04 | 300.89704 | 1.08E-04 |
| 300.70393 | 1.07E-04 | 301.58453 | 1.08E-04 |
| 301.38738 | 1.07E-04 | 302.27203 | 1.08E-04 |
| 302.07084 | 1.07E-04 | 302.95953 | 1.08E-04 |
| 302.75429 | 1.07E-04 | 303.64703 | 1.08E-04 |
| 303.43774 | 1.07E-04 | 304.33452 | 1.08E-04 |
| 304.12119 | 1.07E-04 | 305.02202 | 1.08E-04 |
| 304.80465 | 1.07E-04 | 305.70952 | 1.08E-04 |
| 305.4881  | 1.07E-04 | 306.39702 | 1.08E-04 |
| 306.17155 | 1.07E-04 | 307.08451 | 1.08E-04 |
| 306.855   | 1.07E-04 | 307.77201 | 1.08E-04 |
| 307.53845 | 1.07E-04 | 308.45951 | 1.07E-04 |
| 308.22191 | 1.07E-04 | 309.147   | 1.07E-04 |
| 308.90536 | 1.06E-04 | 309.8345  | 1.07E-04 |
| 309.58881 | 1.06E-04 | 310.522   | 1.07E-04 |
| 310.27226 | 1.06E-04 | 311.2095  | 1.07E-04 |
| 310.95572 | 1.06E-04 | 311.89699 | 1.07E-04 |
| 311.63917 | 1.06E-04 | 312.58449 | 1.07E-04 |
| 312.32262 | 1.06E-04 | 313.27199 | 1.07E-04 |
| 313.00607 | 1.06E-04 | 313.95949 | 1.07E-04 |
| 313.68952 | 1.06E-04 | 314.64698 | 1.07E-04 |
| 314.37298 | 1.06E-04 | 315.33448 | 1.06E-04 |
| 315.05643 | 1.06E-04 | 316.02198 | 1.06E-04 |
| 315.73988 | 1.06E-04 | 316.70948 | 1.06E-04 |
| 316.42333 | 1.06E-04 | 317.39697 | 1.06E-04 |
| 317.10679 | 1.06E-04 | 318.08447 | 1.06E-04 |
| 317.79024 | 1.05E-04 | 318.77197 | 1.06E-04 |
| 318.47369 | 1.05E-04 | 319.45947 | 1.06E-04 |
| 319.15714 | 1.05E-04 | 320.14696 | 1.06E-04 |
| 319.84059 | 1.05E-04 | 320.83446 | 1.06E-04 |
| 320.52405 | 1.05E-04 | 321.52196 | 1.06E-04 |
| 321.2075  | 1.05E-04 | 322.20946 | 1.05E-04 |
| 321.89095 | 1.05E-04 | 322.89695 | 1.05E-04 |
| 322.5744  | 1.05E-04 | 323.58445 | 1.05E-04 |
| 323.25786 | 1.05E-04 | 324.27195 | 1.05E-04 |
| 323.94131 | 1.05E-04 | 324.95945 | 1.05E-04 |
| 324.62476 | 1.05E-04 | 325.64694 | 1.05E-04 |

|           |          |           |          |
|-----------|----------|-----------|----------|
| 325.30821 | 1.05E-04 | 326.33444 | 1.05E-04 |
| 325.99166 | 1.04E-04 | 327.02194 | 1.05E-04 |
| 326.67512 | 1.04E-04 | 327.70943 | 1.05E-04 |
| 327.35857 | 1.04E-04 | 328.39693 | 1.05E-04 |
| 328.04202 | 1.04E-04 | 329.08443 | 1.04E-04 |
| 328.72547 | 1.04E-04 | 329.77193 | 1.04E-04 |
| 329.40892 | 1.04E-04 | 330.45942 | 1.04E-04 |
| 330.09238 | 1.04E-04 | 331.14692 | 1.04E-04 |
| 330.77583 | 1.04E-04 | 331.83442 | 1.04E-04 |
| 331.45928 | 1.04E-04 | 332.52192 | 1.04E-04 |
| 332.14273 | 1.04E-04 | 333.20941 | 1.04E-04 |
| 332.82619 | 1.04E-04 | 333.89691 | 1.04E-04 |
| 333.50964 | 1.04E-04 | 334.58441 | 1.04E-04 |
| 334.19309 | 1.03E-04 | 335.27191 | 1.04E-04 |
| 334.87654 | 1.03E-04 | 335.9594  | 1.04E-04 |
| 335.55999 | 1.03E-04 | 336.6469  | 1.04E-04 |
| 336.24345 | 1.03E-04 | 337.3344  | 1.04E-04 |
| 336.9269  | 1.03E-04 | 338.0219  | 1.03E-04 |
| 337.61035 | 1.03E-04 | 338.70939 | 1.03E-04 |
| 338.2938  | 1.03E-04 | 339.39689 | 1.03E-04 |
| 338.97726 | 1.03E-04 | 340.08439 | 1.03E-04 |
| 339.66071 | 1.03E-04 | 340.77189 | 1.03E-04 |
| 340.34416 | 1.03E-04 | 341.45938 | 1.03E-04 |
| 341.02761 | 1.03E-04 | 342.14688 | 1.03E-04 |
| 341.71106 | 1.03E-04 | 342.83438 | 1.03E-04 |
| 342.39452 | 1.03E-04 | 343.52188 | 1.03E-04 |
| 343.07797 | 1.03E-04 | 344.20937 | 1.03E-04 |
| 343.76142 | 1.03E-04 | 344.89687 | 1.03E-04 |
| 344.44487 | 1.02E-04 | 345.58437 | 1.03E-04 |
| 345.12833 | 1.02E-04 | 346.27187 | 1.03E-04 |
| 345.81178 | 1.02E-04 | 346.95936 | 1.03E-04 |
| 346.49523 | 1.02E-04 | 347.64686 | 1.02E-04 |

| moH     | T5K-PA  | moH     | T5K-PE  | moH     | T5K-PA  | moH     |
|---------|---------|---------|---------|---------|---------|---------|
| 2.01233 | 1       | 2.01586 | 0.9913  | 2.01233 | 1       | 2.01124 |
| 2.01232 | 0.9868  | 2.0096  | 0.99286 | 2.01232 | 0.9868  | 2.01118 |
| 2.01227 | 0.98516 | 1.99544 | 0.99306 | 2.01227 | 0.98516 | 2.0112  |
| 2.01227 | 0.99094 | 1.97879 | 0.99303 | 2.01227 | 0.99094 | 2.00982 |
| 2.0073  | 0.988   | 1.96189 | 0.99144 | 2.0073  | 0.988   | 2.00157 |
| 1.99465 | 0.98594 | 1.94439 | 0.99371 | 1.99465 | 0.98594 | 1.98631 |
| 1.97819 | 0.9757  | 1.92689 | 0.9949  | 1.97819 | 0.9757  | 1.9696  |
| 1.96108 | 0.97508 | 1.91182 | 0.99428 | 1.96108 | 0.97508 | 1.95208 |
| 1.9438  | 0.9731  | 1.89578 | 0.9957  | 1.9438  | 0.9731  | 1.93477 |
| 1.92633 | 0.96876 | 1.87793 | 0.99456 | 1.92633 | 0.96876 | 1.918   |
| 1.91087 | 0.98695 | 1.86033 | 0.99396 | 1.91087 | 0.98695 | 1.90255 |
| 1.8948  | 1.00062 | 1.84311 | 0.99557 | 1.8948  | 1.00062 | 1.88623 |
| 1.87733 | 0.99455 | 1.82446 | 0.99771 | 1.87733 | 0.99455 | 1.86846 |
| 1.85975 | 0.99376 | 1.80576 | 0.99747 | 1.85975 | 0.99376 | 1.85097 |
| 1.84223 | 0.98477 | 1.78828 | 0.996   | 1.84223 | 0.98477 | 1.8336  |
| 1.82474 | 0.97954 | 1.77154 | 0.99673 | 1.82474 | 0.97954 | 1.81446 |
| 1.80558 | 0.98817 | 1.75537 | 0.99765 | 1.80558 | 0.98817 | 1.7959  |
| 1.78742 | 0.98399 | 1.73852 | 0.99777 | 1.78742 | 0.98399 | 1.77893 |
| 1.77083 | 0.98534 | 1.72338 | 0.99638 | 1.77083 | 0.98534 | 1.76254 |
| 1.75444 | 0.9904  | 1.70787 | 0.99614 | 1.75444 | 0.9904  | 1.74571 |
| 1.73763 | 0.98405 | 1.6899  | 0.99774 | 1.73763 | 0.98405 | 1.72903 |
| 1.72298 | 0.98964 | 1.67187 | 0.9976  | 1.72298 | 0.98964 | 1.71406 |
| 1.70708 | 0.99048 | 1.6543  | 0.99774 | 1.70708 | 0.99048 | 1.69833 |
| 1.6891  | 0.9885  | 1.63617 | 0.99848 | 1.6891  | 0.9885  | 1.68021 |
| 1.6711  | 0.99996 | 1.62211 | 0.99808 | 1.6711  | 0.99996 | 1.66224 |
| 1.65348 | 0.99688 | 1.60742 | 0.99701 | 1.65348 | 0.99688 | 1.6442  |
| 1.63598 | 0.99623 | 1.58931 | 0.99742 | 1.63598 | 0.99623 | 1.62642 |
| 1.62021 | 1.00085 | 1.57085 | 0.99894 | 1.62021 | 1.00085 | 1.61278 |
| 1.6057  | 0.99808 | 1.5522  | 0.99993 | 1.6057  | 0.99808 | 1.5979  |
| 1.58899 | 0.99568 | 1.53388 | 1       | 1.58899 | 0.99568 | 1.57973 |
| 1.5703  | 0.99669 | 1.51595 | 0.99979 | 1.5703  | 0.99669 | 1.56129 |
| 1.55174 | 0.99947 | 1.49869 | 0.99926 | 1.55174 | 0.99947 | 1.54244 |
| 1.53362 | 1.00816 | 1.48176 | 0.99887 | 1.53362 | 1.00816 | 1.52396 |
| 1.51544 | 1.00589 | 1.46439 | 0.9994  | 1.51544 | 1.00589 | 1.50626 |
| 1.49815 | 1.00194 | 1.44694 | 1       | 1.49815 | 1.00194 | 1.489   |
| 1.48084 | 0.99051 | 1.42965 | 0.99958 | 1.48084 | 0.99051 | 1.47214 |
| 1.46343 | 0.98471 | 1.40992 | 0.99974 | 1.46343 | 0.98471 | 1.45499 |
| 1.44652 | 0.98956 | 1.3919  | 0.99899 | 1.44652 | 0.98956 | 1.43774 |
| 1.42892 | 0.98452 | 1.37547 | 0.99892 | 1.42892 | 0.98452 | 1.41881 |
| 1.40931 | 0.9802  | 1.35914 | 0.99981 | 1.40931 | 0.9802  | 1.39965 |
| 1.39089 | 0.98255 | 1.34258 | 0.99915 | 1.39089 | 0.98255 | 1.38266 |
| 1.3745  | 0.97914 | 1.32656 | 0.99721 | 1.3745  | 0.97914 | 1.36638 |
| 1.35839 | 0.9803  | 1.31082 | 0.99657 | 1.35839 | 0.9803  | 1.34966 |
| 1.34171 | 0.9935  | 1.29346 | 0.99718 | 1.34171 | 0.9935  | 1.3331  |
| 1.32532 | 0.99516 | 1.27591 | 0.99826 | 1.32532 | 0.99516 | 1.31764 |
| 1.30986 | 0.98859 | 1.25815 | 1.00015 | 1.30986 | 0.98859 | 1.3011  |

|         |         |         |         |         |         |         |
|---------|---------|---------|---------|---------|---------|---------|
| 1.29276 | 0.9913  | 1.24068 | 0.9989  | 1.29276 | 0.9913  | 1.28376 |
| 1.27533 | 1.00318 | 1.22435 | 0.99699 | 1.27533 | 1.00318 | 1.26609 |
| 1.25766 | 0.99561 | 1.20759 | 0.9962  | 1.25766 | 0.99561 | 1.24863 |
| 1.24026 | 0.98475 | 1.19034 | 0.9954  | 1.24026 | 0.98475 | 1.23143 |
| 1.22365 | 0.98493 | 1.17293 | 0.996   | 1.22365 | 0.98493 | 1.21505 |
| 1.20697 | 0.9883  | 1.15486 | 0.99584 | 1.20697 | 0.9883  | 1.19822 |
| 1.18969 | 0.98431 | 1.13731 | 0.99366 | 1.18969 | 0.98431 | 1.18064 |
| 1.17209 | 0.97994 | 1.12002 | 0.99413 | 1.17209 | 0.97994 | 1.16311 |
| 1.15449 | 0.98221 | 1.10271 | 0.99547 | 1.15449 | 0.98221 | 1.14521 |
| 1.13658 | 0.98508 | 1.08569 | 0.99512 | 1.13658 | 0.98508 | 1.12773 |
| 1.11899 | 0.98385 | 1.06821 | 0.99338 | 1.11899 | 0.98385 | 1.11009 |
| 1.10155 | 0.97081 | 1.0507  | 0.99195 | 1.10155 | 0.97081 | 1.09288 |
| 1.08443 | 0.96864 | 1.0338  | 0.99117 | 1.08443 | 0.96864 | 1.07569 |
| 1.06762 | 0.96971 | 1.01656 | 0.98934 | 1.06762 | 0.96971 | 1.05833 |
| 1.0502  | 0.96461 | 0.99893 | 0.98867 | 1.0502  | 0.96461 | 1.04143 |
| 1.03297 | 0.9784  | 0.98201 | 0.98884 | 1.03297 | 0.9784  | 1.02401 |
| 1.0154  | 0.98551 | 0.96557 | 0.98859 | 1.0154  | 0.98551 | 1.00637 |
| 0.998   | 0.9811  | 0.9482  | 0.98725 | 0.998   | 0.9811  | 0.98956 |
| 0.98129 | 0.98906 | 0.93074 | 0.98499 | 0.98129 | 0.98906 | 0.97252 |
| 0.9647  | 0.99493 | 0.91344 | 0.98262 | 0.9647  | 0.99493 | 0.95552 |
| 0.94746 | 0.986   | 0.89612 | 0.98081 | 0.94746 | 0.986   | 0.9387  |
| 0.93015 | 0.97468 | 0.87897 | 0.98164 | 0.93015 | 0.97468 | 0.92132 |
| 0.91235 | 0.96863 | 0.86185 | 0.97962 | 0.91235 | 0.96863 | 0.90374 |
| 0.89517 | 0.97452 | 0.8451  | 0.97502 | 0.89517 | 0.97452 | 0.88686 |
| 0.87878 | 0.98729 | 0.8281  | 0.97421 | 0.87878 | 0.98729 | 0.86951 |
| 0.86149 | 0.98196 | 0.81043 | 0.97307 | 0.86149 | 0.98196 | 0.85228 |
| 0.84443 | 0.98618 | 0.79338 | 0.97035 | 0.84443 | 0.98618 | 0.83561 |
| 0.82711 | 0.97505 | 0.77568 | 0.96727 | 0.82711 | 0.97505 | 0.81826 |
| 0.80954 | 0.96046 | 0.75792 | 0.96394 | 0.80954 | 0.96046 | 0.80053 |
| 0.79227 | 0.97241 | 0.74152 | 0.96282 | 0.79227 | 0.97241 | 0.78367 |
| 0.77483 | 0.96723 | 0.72493 | 0.9595  | 0.77483 | 0.96723 | 0.76619 |
| 0.75739 | 0.96546 | 0.70793 | 0.95617 | 0.75739 | 0.96546 | 0.74858 |
| 0.74074 | 0.95707 | 0.69058 | 0.95344 | 0.74074 | 0.95707 | 0.73202 |
| 0.72399 | 0.96072 | 0.67263 | 0.94892 | 0.72399 | 0.96072 | 0.7157  |
| 0.707   | 0.96469 | 0.65537 | 0.94515 | 0.707   | 0.96469 | 0.69894 |
| 0.68981 | 0.9527  | 0.63836 | 0.94143 | 0.68981 | 0.9527  | 0.68135 |
| 0.67189 | 0.95926 | 0.62188 | 0.93654 | 0.67189 | 0.95926 | 0.66315 |
| 0.65447 | 0.96039 | 0.60526 | 0.93075 | 0.65447 | 0.96039 | 0.6455  |
| 0.63738 | 0.96031 | 0.58808 | 0.92443 | 0.63738 | 0.96031 | 0.62869 |
| 0.62107 | 0.9553  | 0.57108 | 0.91699 | 0.62107 | 0.9553  | 0.61242 |
| 0.60439 | 0.9508  | 0.55394 | 0.90962 | 0.60439 | 0.9508  | 0.59579 |
| 0.58717 | 0.94594 | 0.53614 | 0.90203 | 0.58717 | 0.94594 | 0.57849 |
| 0.57053 | 0.94579 | 0.51945 | 0.89313 | 0.57053 | 0.94579 | 0.56154 |
| 0.55305 | 0.95117 | 0.50242 | 0.88488 | 0.55305 | 0.95117 | 0.54438 |
| 0.53522 | 0.93847 | 0.48444 | 0.87691 | 0.53522 | 0.93847 | 0.52685 |
| 0.51866 | 0.94445 | 0.466   | 0.8653  | 0.51866 | 0.94445 | 0.50987 |
| 0.50199 | 0.94361 | 0.44875 | 0.85286 | 0.50199 | 0.94361 | 0.49284 |

|          |          |          |          |          |          |          |
|----------|----------|----------|----------|----------|----------|----------|
| 0.48414  | 0.92277  | 0.43198  | 0.8416   | 0.48414  | 0.92277  | 0.475    |
| 0.46547  | 0.91924  | 0.41504  | 0.82857  | 0.46547  | 0.91924  | 0.45656  |
| 0.44758  | 0.92367  | 0.39797  | 0.81443  | 0.44758  | 0.92367  | 0.43915  |
| 0.43077  | 0.93392  | 0.38117  | 0.7996   | 0.43077  | 0.93392  | 0.42213  |
| 0.41374  | 0.93313  | 0.36436  | 0.78442  | 0.41374  | 0.93313  | 0.40508  |
| 0.39713  | 0.90081  | 0.34758  | 0.76757  | 0.39713  | 0.90081  | 0.38857  |
| 0.38036  | 0.88375  | 0.33004  | 0.74946  | 0.38036  | 0.88375  | 0.3718   |
| 0.36379  | 0.89054  | 0.31243  | 0.72976  | 0.36379  | 0.89054  | 0.3548   |
| 0.34714  | 0.88404  | 0.2953   | 0.70862  | 0.34714  | 0.88404  | 0.33791  |
| 0.32951  | 0.88431  | 0.2779   | 0.6874   | 0.32951  | 0.88431  | 0.32027  |
| 0.3115   | 0.88963  | 0.26111  | 0.66541  | 0.3115   | 0.88963  | 0.30269  |
| 0.29435  | 0.86917  | 0.24389  | 0.64212  | 0.29435  | 0.86917  | 0.2852   |
| 0.27688  | 0.85708  | 0.2256   | 0.61583  | 0.27688  | 0.85708  | 0.26815  |
| 0.26034  | 0.85736  | 0.20775  | 0.58835  | 0.26034  | 0.85736  | 0.25118  |
| 0.24297  | 0.83127  | 0.1903   | 0.56202  | 0.24297  | 0.83127  | 0.23376  |
| 0.22512  | 0.80352  | 0.173    | 0.5326   | 0.22512  | 0.80352  | 0.216    |
| 0.20704  | 0.80009  | 0.1562   | 0.50082  | 0.20704  | 0.80009  | 0.19798  |
| 0.18958  | 0.79186  | 0.13859  | 0.4681   | 0.18958  | 0.79186  | 0.18063  |
| 0.17249  | 0.76972  | 0.12074  | 0.43212  | 0.17249  | 0.76972  | 0.16375  |
| 0.15524  | 0.74337  | 0.10331  | 0.39585  | 0.15524  | 0.74337  | 0.14628  |
| 0.13799  | 0.73378  | 0.08517  | 0.35795  | 0.13799  | 0.73378  | 0.12861  |
| 0.12013  | 0.72476  | 0.06713  | 0.3168   | 0.12013  | 0.72476  | 0.11117  |
| 0.10237  | 0.68662  | 0.05033  | 0.27448  | 0.10237  | 0.68662  | 0.09317  |
| 0.08431  | 0.64461  | 0.03364  | 0.23038  | 0.08431  | 0.64461  | 0.07533  |
| 0.06639  | 0.60831  | 0.01396  | 0.18653  | 0.06639  | 0.60831  | 0.0577   |
| 0.04951  | 0.55913  | -0.0057  | 0.13679  | 0.04951  | 0.55913  | 0.04061  |
| 0.03269  | 0.49459  | -0.02447 | 0.08011  | 0.03269  | 0.49459  | 0.02463  |
| 0.0127   | 0.43993  | -0.04386 | 0.02424  | 0.0127   | 0.43993  | 0.00474  |
| -0.00671 | 0.36168  | -0.06169 | -0.03015 | -0.00671 | 0.36168  | -0.01547 |
| -0.02514 | 0.2638   | -0.07648 | -0.08744 | -0.02514 | 0.2638   | -0.03401 |
| -0.0443  | 0.17618  | -0.09138 | -0.14426 | -0.0443  | 0.17618  | -0.0538  |
| -0.06388 | 0.08815  | -0.10831 | -0.19564 | -0.06388 | 0.08815  | -0.06949 |
| -0.078   | -0.00502 | -0.12569 | -0.24487 | -0.078   | -0.00502 | -0.08413 |
| -0.09273 | -0.08819 | -0.14307 | -0.29308 | -0.09273 | -0.08819 | -0.10092 |
| -0.10927 | -0.16144 | -0.15732 | -0.34101 | -0.10927 | -0.16144 | -0.1176  |
| -0.12664 | -0.23994 | -0.17258 | -0.38748 | -0.12664 | -0.23994 | -0.1347  |
| -0.14413 | -0.31356 | -0.18956 | -0.43031 | -0.14413 | -0.31356 | -0.15272 |
| -0.15869 | -0.38621 | -0.20681 | -0.4725  | -0.15869 | -0.38621 | -0.16703 |
| -0.17391 | -0.44788 | -0.22423 | -0.51338 | -0.17391 | -0.44788 | -0.18219 |
| -0.19095 | -0.50867 | -0.242   | -0.55219 | -0.19095 | -0.50867 | -0.19936 |
| -0.20813 | -0.5777  | -0.2595  | -0.58775 | -0.20813 | -0.5777  | -0.21657 |
| -0.22534 | -0.65187 | -0.27711 | -0.62129 | -0.22534 | -0.65187 | -0.23414 |
| -0.24261 | -0.70838 | -0.29427 | -0.6536  | -0.24261 | -0.70838 | -0.25174 |
| -0.26052 | -0.75962 | -0.31092 | -0.68348 | -0.26052 | -0.75962 | -0.26917 |
| -0.2782  | -0.80186 | -0.32811 | -0.7119  | -0.2782  | -0.80186 | -0.28629 |
| -0.29522 | -0.81912 | -0.34523 | -0.73693 | -0.29522 | -0.81912 | -0.30339 |
| -0.31229 | -0.84528 | -0.36228 | -0.76036 | -0.31229 | -0.84528 | -0.32065 |

|          |          |          |          |          |          |          |
|----------|----------|----------|----------|----------|----------|----------|
| -0.32913 | -0.86456 | -0.3798  | -0.78122 | -0.32913 | -0.86456 | -0.33772 |
| -0.3463  | -0.88241 | -0.39711 | -0.80025 | -0.3463  | -0.88241 | -0.35454 |
| -0.36346 | -0.90723 | -0.4146  | -0.81968 | -0.36346 | -0.90723 | -0.37189 |
| -0.38085 | -0.91543 | -0.43173 | -0.83566 | -0.38085 | -0.91543 | -0.38894 |
| -0.39803 | -0.91607 | -0.4485  | -0.85034 | -0.39803 | -0.91607 | -0.40645 |
| -0.41525 | -0.91467 | -0.46473 | -0.86471 | -0.41525 | -0.91467 | -0.42403 |
| -0.43235 | -0.92805 | -0.48104 | -0.87692 | -0.43235 | -0.92805 | -0.44067 |
| -0.44971 | -0.94454 | -0.49828 | -0.88776 | -0.44971 | -0.94454 | -0.45813 |
| -0.46568 | -0.94318 | -0.51573 | -0.89681 | -0.46568 | -0.94318 | -0.47409 |
| -0.48195 | -0.94186 | -0.53285 | -0.90622 | -0.48195 | -0.94186 | -0.49016 |
| -0.49925 | -0.94455 | -0.55011 | -0.91412 | -0.49925 | -0.94455 | -0.50798 |
| -0.51691 | -0.9515  | -0.56799 | -0.92126 | -0.51691 | -0.9515  | -0.52555 |
| -0.53423 | -0.95925 | -0.58549 | -0.92765 | -0.53423 | -0.95925 | -0.5427  |
| -0.55107 | -0.96469 | -0.60171 | -0.93155 | -0.55107 | -0.96469 | -0.56    |
| -0.56882 | -0.96736 | -0.61779 | -0.93791 | -0.56882 | -0.96736 | -0.57771 |
| -0.58667 | -0.96395 | -0.63467 | -0.94384 | -0.58667 | -0.96395 | -0.59531 |
| -0.60269 | -0.95364 | -0.65208 | -0.9479  | -0.60269 | -0.95364 | -0.6113  |
| -0.61903 | -0.95459 | -0.66905 | -0.95188 | -0.61903 | -0.95459 | -0.62705 |
| -0.63593 | -0.95943 | -0.68617 | -0.95562 | -0.63593 | -0.95943 | -0.64413 |
| -0.65321 | -0.95798 | -0.70403 | -0.95947 | -0.65321 | -0.95798 | -0.66147 |
| -0.67037 | -0.96519 | -0.72184 | -0.96195 | -0.67037 | -0.96519 | -0.67876 |
| -0.68711 | -0.97116 | -0.73894 | -0.96444 | -0.68711 | -0.97116 | -0.69579 |
| -0.70501 | -0.97482 | -0.75541 | -0.96589 | -0.70501 | -0.97482 | -0.71333 |
| -0.72274 | -0.97577 | -0.77265 | -0.96936 | -0.72274 | -0.97577 | -0.73091 |
| -0.73986 | -0.98037 | -0.78984 | -0.97314 | -0.73986 | -0.98037 | -0.74771 |
| -0.75661 | -0.98309 | -0.80641 | -0.97317 | -0.75661 | -0.98309 | -0.76489 |
| -0.77378 | -0.97859 | -0.82374 | -0.97444 | -0.77378 | -0.97859 | -0.78208 |
| -0.79099 | -0.98578 | -0.84114 | -0.97641 | -0.79099 | -0.98578 | -0.79913 |
| -0.80752 | -0.99147 | -0.85808 | -0.97767 | -0.80752 | -0.99147 | -0.816   |
| -0.82487 | -0.99544 | -0.8754  | -0.97929 | -0.82487 | -0.99544 | -0.83338 |
| -0.84219 | -0.98367 | -0.89261 | -0.98058 | -0.84219 | -0.98367 | -0.85086 |
| -0.85947 | -0.9833  | -0.90908 | -0.98189 | -0.85947 | -0.9833  | -0.86786 |
| -0.8767  | -0.99571 | -0.92553 | -0.98427 | -0.8767  | -0.99571 | -0.8853  |
| -0.89355 | -0.98743 | -0.9432  | -0.98432 | -0.89355 | -0.98743 | -0.90194 |
| -0.9104  | -0.97687 | -0.96184 | -0.9834  | -0.9104  | -0.97687 | -0.91811 |
| -0.9271  | -0.99037 | -0.97972 | -0.98553 | -0.9271  | -0.99037 | -0.93514 |
| -0.94432 | -1.00343 | -0.99554 | -0.98518 | -0.94432 | -1.00343 | -0.95313 |
| -0.96266 | -0.99777 | -1.01183 | -0.98548 | -0.96266 | -0.99777 | -0.97142 |
| -0.98061 | -0.99387 | -1.02883 | -0.98584 | -0.98061 | -0.99387 | -0.98904 |
| -0.99692 | -0.98178 | -1.04595 | -0.98612 | -0.99692 | -0.98178 | -1.00517 |
| -1.01343 | -0.98669 | -1.06283 | -0.98785 | -1.01343 | -0.98669 | -1.02133 |
| -1.03025 | -0.98855 | -1.07952 | -0.98797 | -1.03025 | -0.98855 | -1.03843 |
| -1.04694 | -0.99439 | -1.09752 | -0.98798 | -1.04694 | -0.99439 | -1.05533 |
| -1.06391 | -0.99974 | -1.1154  | -0.98744 | -1.06391 | -0.99974 | -1.07227 |
| -1.08097 | -0.9905  | -1.13255 | -0.9881  | -1.08097 | -0.9905  | -1.08918 |
| -1.09856 | -0.99464 | -1.15018 | -0.98764 | -1.09856 | -0.99464 | -1.10705 |
| -1.1164  | -0.99005 | -1.16754 | -0.9864  | -1.1164  | -0.99005 | -1.12498 |

|          |          |          |          |          |          |          |
|----------|----------|----------|----------|----------|----------|----------|
| -1.13406 | -0.99031 | -1.18463 | -0.98761 | -1.13406 | -0.99031 | -1.14242 |
| -1.15148 | -0.99294 | -1.20088 | -0.98806 | -1.15148 | -0.99294 | -1.15969 |
| -1.16855 | -1.00182 | -1.21766 | -0.98843 | -1.16855 | -1.00182 | -1.17706 |
| -1.18562 | -1.00462 | -1.23477 | -0.98836 | -1.18562 | -1.00462 | -1.19366 |
| -1.20222 | -1.00579 | -1.25166 | -0.98961 | -1.20222 | -1.00579 | -1.21003 |
| -1.21868 | -1.00587 | -1.26893 | -0.99011 | -1.21868 | -1.00587 | -1.22683 |
| -1.23557 | -0.99175 | -1.28666 | -0.98911 | -1.23557 | -0.99175 | -1.24422 |
| -1.25281 | -1.00698 | -1.30437 | -0.99019 | -1.25281 | -1.00698 | -1.26149 |
| -1.26994 | -1.01068 | -1.32229 | -0.99106 | -1.26994 | -1.01068 | -1.27867 |
| -1.28714 | -0.99597 | -1.34002 | -0.99118 | -1.28714 | -0.99597 | -1.29642 |
| -1.30487 | -0.99077 | -1.3575  | -0.98953 | -1.30487 | -0.99077 | -1.31418 |
| -1.32286 | -0.9984  | -1.37542 | -0.98749 | -1.32286 | -0.9984  | -1.33157 |
| -1.34085 | -1.0074  | -1.3917  | -0.98786 | -1.34085 | -1.0074  | -1.34945 |
| -1.35844 | -1.0052  | -1.40721 | -0.98928 | -1.35844 | -1.0052  | -1.36763 |
| -1.37633 | -1.01724 | -1.42371 | -0.9898  | -1.37633 | -1.01724 | -1.38527 |
| -1.39352 | -1.01624 | -1.44107 | -0.99013 | -1.39352 | -1.01624 | -1.40049 |
| -1.40915 | -1.00799 | -1.45847 | -0.99062 | -1.40915 | -1.00799 | -1.4162  |
| -1.42528 | -1.01062 | -1.47598 | -0.98903 | -1.42528 | -1.01062 | -1.43351 |
| -1.4421  | -1.00082 | -1.49305 | -0.98902 | -1.4421  | -1.00082 | -1.45088 |
| -1.4596  | -1.00401 | -1.51031 | -0.98967 | -1.4596  | -1.00401 | -1.46812 |
| -1.47698 | -1.01447 | -1.52766 | -0.98862 | -1.47698 | -1.01447 | -1.48509 |
| -1.49369 | -1.00269 | -1.54534 | -0.98762 | -1.49369 | -1.00269 | -1.5023  |
| -1.51107 | -1.00228 | -1.56304 | -0.98761 | -1.51107 | -1.00228 | -1.51966 |
| -1.5286  | -1.01506 | -1.58027 | -0.98856 | -1.5286  | -1.01506 | -1.53739 |
| -1.54636 | -1.00952 | -1.59613 | -0.98905 | -1.54636 | -1.00952 | -1.55505 |
| -1.56408 | -1.0036  | -1.61214 | -0.98928 | -1.56408 | -1.0036  | -1.57276 |
| -1.58135 | -1.01632 | -1.62867 | -0.98986 | -1.58135 | -1.01632 | -1.59007 |
| -1.59712 | -1.01932 | -1.64513 | -0.99029 | -1.59712 | -1.01932 | -1.60563 |
| -1.61333 | -1.00858 | -1.66187 | -0.98927 | -1.61333 | -1.00858 | -1.62164 |
| -1.63    | -1.00089 | -1.67872 | -0.98691 | -1.63    | -1.00089 | -1.63819 |
| -1.64633 | -1.00892 | -1.69723 | -0.98797 | -1.64633 | -1.00892 | -1.65485 |
| -1.66307 | -1.01253 | -1.7154  | -0.98836 | -1.66307 | -1.01253 | -1.67164 |
| -1.67972 | -1.00327 | -1.73192 | -0.9877  | -1.67972 | -1.00327 | -1.68877 |
| -1.69821 | -1.0158  | -1.74821 | -0.98856 | -1.69821 | -1.0158  | -1.7068  |
| -1.71646 | -1.01787 | -1.76501 | -0.98871 | -1.71646 | -1.01787 | -1.72456 |
| -1.73297 | -1.01234 | -1.7822  | -0.98693 | -1.73297 | -1.01234 | -1.74157 |
| -1.7497  | -1.01578 | -1.80084 | -0.98528 | -1.7497  | -1.01578 | -1.75813 |
| -1.7667  | -1.00572 | -1.81916 | -0.98739 | -1.7667  | -1.00572 | -1.77457 |
| -1.78344 | -0.99897 | -1.83655 | -0.98642 | -1.78344 | -0.99897 | -1.79247 |
| -1.80159 | -1.00661 | -1.85381 | -0.98401 | -1.80159 | -1.00661 | -1.81091 |
| -1.82013 | -1.01089 | -1.87126 | -0.9835  | -1.82013 | -1.01089 | -1.82845 |
| -1.83762 | -1.01062 | -1.8882  | -0.98369 | -1.83762 | -1.01062 | -1.84602 |
| -1.85469 | -1.00477 | -1.9047  | -0.98545 | -1.85469 | -1.00477 | -1.86343 |
| -1.87181 | -1.00464 | -1.92183 | -0.98272 | -1.87181 | -1.00464 | -1.8805  |
| -1.88927 | -1.01383 | -1.93922 | -0.98219 | -1.88927 | -1.01383 | -1.89712 |
| -1.90612 | -1.00695 | -1.95684 | -0.98489 | -1.90612 | -1.00695 | -1.91399 |
| -1.92319 | -1.00074 | -1.9743  | -0.98328 | -1.92319 | -1.00074 | -1.93165 |



|          |          |          |          |          |          |          |
|----------|----------|----------|----------|----------|----------|----------|
| -1.94033 | -1.00555 | -1.98742 | -0.98446 | -1.94033 | -1.00555 | -1.94903 |
| -1.95779 | -1.00754 | -1.99276 | -0.98522 | -1.95779 | -1.00754 | -1.96654 |
| -1.97571 | -1.01289 | -1.99432 | -0.98379 | -1.97571 | -1.01289 | -1.98352 |
| -1.98973 | -1       | -1.99465 | -0.98269 | -1.98973 | -1       | -1.99483 |
| -1.99645 | -0.9839  | -1.99472 | -0.98316 | -1.99645 | -0.9839  | -1.99869 |
| -1.99844 | -0.98903 | -1.99474 | -0.98496 | -1.99844 | -0.98903 | -1.99989 |
| -1.99906 | -1.00025 | -1.99473 | -0.98465 | -1.99906 | -1.00025 | -2.00027 |
| -1.99923 | -1.01197 | -1.99474 | -0.98558 | -1.99923 | -1.01197 | -2.00035 |
| -1.99925 | -1.00925 | -1.99476 | -0.98459 | -1.99925 | -1.00925 | -2.00037 |
| -1.99925 | -0.99027 | -1.99477 | -0.9838  | -1.99925 | -0.99027 | -2.00039 |
| -1.99927 | -0.99008 | -1.99272 | -0.98343 | -1.99927 | -0.99008 | -2.0004  |
| -1.99928 | -1.00692 | -1.98235 | -0.98487 | -1.99928 | -1.00692 | -2.00037 |
| -1.99812 | -1.00063 | -1.96672 | -0.98744 | -1.99812 | -1.00063 | -1.99713 |
| -1.99086 | -0.99044 | -1.94991 | -0.98671 | -1.99086 | -0.99044 | -1.98648 |
| -1.97594 | -0.98326 | -1.93316 | -0.98869 | -1.97594 | -0.98326 | -1.97072 |
| -1.95916 | -0.98324 | -1.91596 | -0.98939 | -1.95916 | -0.98324 | -1.95385 |
| -1.9424  | -0.99827 | -1.89926 | -0.98931 | -1.9424  | -0.99827 | -1.93685 |
| -1.92561 | -0.998   | -1.88291 | -0.99015 | -1.92561 | -0.998   | -1.91976 |
| -1.90857 | -0.99405 | -1.86594 | -0.98913 | -1.90857 | -0.99405 | -1.9032  |
| -1.89181 | -0.99991 | -1.84836 | -0.99098 | -1.89181 | -0.99991 | -1.88684 |
| -1.8752  | -0.99649 | -1.83088 | -0.99112 | -1.8752  | -0.99649 | -1.86954 |
| -1.85781 | -0.98454 | -1.81396 | -0.99037 | -1.85781 | -0.98454 | -1.85212 |
| -1.84065 | -0.99818 | -1.79517 | -0.99264 | -1.84065 | -0.99818 | -1.83507 |
| -1.82324 | -1.00195 | -1.77716 | -0.99237 | -1.82324 | -1.00195 | -1.81745 |
| -1.80542 | -0.98297 | -1.76026 | -0.99338 | -1.80542 | -0.98297 | -1.79856 |
| -1.78708 | -0.98602 | -1.74333 | -0.99415 | -1.78708 | -0.98602 | -1.78107 |
| -1.76956 | -1.00067 | -1.72684 | -0.99259 | -1.76956 | -1.00067 | -1.76414 |
| -1.75267 | -1.00472 | -1.71027 | -0.99296 | -1.75267 | -1.00472 | -1.74744 |
| -1.73592 | -0.99579 | -1.6919  | -0.99397 | -1.73592 | -0.99579 | -1.73074 |
| -1.71957 | -0.98925 | -1.67359 | -0.996   | -1.71957 | -0.98925 | -1.71413 |
| -1.70176 | -0.98843 | -1.65698 | -0.99564 | -1.70176 | -0.98843 | -1.69596 |
| -1.68362 | -0.99287 | -1.64061 | -0.99469 | -1.68362 | -0.99287 | -1.67781 |
| -1.66624 | -0.99066 | -1.62377 | -0.99475 | -1.66624 | -0.99066 | -1.66081 |
| -1.64949 | -0.99253 | -1.60708 | -0.99551 | -1.64949 | -0.99253 | -1.64412 |
| -1.63285 | -0.99818 | -1.59122 | -0.99661 | -1.63285 | -0.99818 | -1.62777 |
| -1.61613 | -0.99579 | -1.57477 | -0.99589 | -1.61613 | -0.99579 | -1.61088 |
| -1.6008  | -0.99883 | -1.55748 | -0.99559 | -1.6008  | -0.99883 | -1.59507 |
| -1.58447 | -0.99305 | -1.54014 | -0.99694 | -1.58447 | -0.99305 | -1.57901 |
| -1.56688 | -0.98715 | -1.52232 | -0.99568 | -1.56688 | -0.98715 | -1.56123 |
| -1.54954 | -0.99945 | -1.50454 | -0.99563 | -1.54954 | -0.99945 | -1.54354 |
| -1.53196 | -1.01419 | -1.48776 | -0.99769 | -1.53196 | -1.01419 | -1.52626 |
| -1.51441 | -1.01076 | -1.47079 | -0.9975  | -1.51441 | -1.01076 | -1.50859 |
| -1.49702 | -0.99822 | -1.45357 | -0.99693 | -1.49702 | -0.99822 | -1.49141 |
| -1.48005 | -0.98882 | -1.43616 | -0.99722 | -1.48005 | -0.98882 | -1.47422 |
| -1.46277 | -0.98188 | -1.4186  | -0.99782 | -1.46277 | -0.98188 | -1.45688 |
| -1.44532 | -0.98797 | -1.40247 | -0.99687 | -1.44532 | -0.98797 | -1.43956 |
| -1.42838 | -0.9964  | -1.38726 | -0.99558 | -1.42838 | -0.9964  | -1.42224 |

|          |          |          |          |          |          |          |
|----------|----------|----------|----------|----------|----------|----------|
| -1.41102 | -0.99535 | -1.37029 | -0.99728 | -1.41102 | -0.99535 | -1.40671 |
| -1.39598 | -1.01434 | -1.35255 | -0.99698 | -1.39598 | -1.01434 | -1.39114 |
| -1.38    | -1.00918 | -1.33449 | -0.99644 | -1.38    | -1.00918 | -1.37417 |
| -1.3623  | -0.99697 | -1.31663 | -0.99785 | -1.3623  | -0.99697 | -1.35662 |
| -1.34433 | -1.01176 | -1.29866 | -0.99713 | -1.34433 | -1.01176 | -1.33858 |
| -1.32657 | -1.00488 | -1.28108 | -0.99597 | -1.32657 | -1.00488 | -1.32072 |
| -1.30858 | -0.99547 | -1.26377 | -0.99649 | -1.30858 | -0.99547 | -1.30294 |
| -1.29091 | -1.00182 | -1.24655 | -0.99684 | -1.29091 | -1.00182 | -1.28506 |
| -1.27352 | -0.99653 | -1.22931 | -0.99662 | -1.27352 | -0.99653 | -1.26781 |
| -1.25638 | -0.99641 | -1.21208 | -0.99688 | -1.25638 | -0.99641 | -1.25093 |
| -1.23905 | -1.00086 | -1.19572 | -0.99771 | -1.23905 | -1.00086 | -1.23328 |
| -1.22154 | -1.00107 | -1.17938 | -0.99731 | -1.22154 | -1.00107 | -1.21594 |
| -1.20485 | -0.9994  | -1.16194 | -0.99569 | -1.20485 | -0.9994  | -1.20003 |
| -1.18834 | -0.99491 | -1.14449 | -0.99641 | -1.18834 | -0.99491 | -1.18323 |
| -1.1714  | -1.00203 | -1.12711 | -0.99535 | -1.1714  | -1.00203 | -1.16587 |
| -1.15432 | -1.01581 | -1.10982 | -0.99458 | -1.15432 | -1.01581 | -1.14867 |
| -1.13653 | -0.99901 | -1.09173 | -0.99387 | -1.13653 | -0.99901 | -1.13093 |
| -1.11907 | -0.97835 | -1.07393 | -0.99181 | -1.11907 | -0.97835 | -1.1134  |
| -1.10116 | -0.98084 | -1.05732 | -0.9922  | -1.10116 | -0.98084 | -1.09539 |
| -1.08374 | -0.98678 | -1.04037 | -0.99167 | -1.08374 | -0.98678 | -1.07794 |
| -1.06662 | -0.98328 | -1.02329 | -0.99203 | -1.06662 | -0.98328 | -1.06097 |
| -1.04961 | -0.97449 | -1.0067  | -0.99196 | -1.04961 | -0.97449 | -1.04405 |
| -1.03272 | -0.96586 | -0.99049 | -0.99024 | -1.03272 | -0.96586 | -1.02711 |
| -1.01562 | -0.97397 | -0.97377 | -0.98925 | -1.01562 | -0.97397 | -1.01069 |
| -0.99994 | -0.98956 | -0.95548 | -0.98851 | -0.99994 | -0.98956 | -0.99446 |
| -0.98323 | -0.98902 | -0.93714 | -0.98764 | -0.98323 | -0.98902 | -0.9773  |
| -0.96536 | -0.99349 | -0.92026 | -0.98599 | -0.96536 | -0.99349 | -0.95954 |
| -0.94707 | -0.99925 | -0.90375 | -0.98436 | -0.94707 | -0.99925 | -0.94132 |
| -0.9295  | -0.99831 | -0.88672 | -0.98281 | -0.9295  | -0.99831 | -0.92377 |
| -0.91258 | -0.99045 | -0.86956 | -0.9829  | -0.91258 | -0.99045 | -0.90755 |
| -0.89609 | -0.98079 | -0.85238 | -0.98238 | -0.89609 | -0.98079 | -0.89114 |
| -0.87951 | -0.97008 | -0.83528 | -0.98053 | -0.87951 | -0.97008 | -0.87358 |
| -0.86203 | -0.96865 | -0.81784 | -0.97805 | -0.86203 | -0.96865 | -0.85652 |
| -0.84471 | -0.96612 | -0.80103 | -0.97605 | -0.84471 | -0.96612 | -0.83911 |
| -0.82761 | -0.95751 | -0.78391 | -0.97433 | -0.82761 | -0.95751 | -0.82178 |
| -0.81026 | -0.97803 | -0.76653 | -0.97061 | -0.81026 | -0.97803 | -0.80477 |
| -0.79348 | -0.98527 | -0.74959 | -0.96926 | -0.79348 | -0.98527 | -0.78765 |
| -0.77627 | -0.97323 | -0.73279 | -0.96807 | -0.77627 | -0.97323 | -0.77065 |
| -0.75909 | -0.97084 | -0.71559 | -0.96421 | -0.75909 | -0.97084 | -0.75357 |
| -0.7421  | -0.97244 | -0.69767 | -0.96189 | -0.7421  | -0.97244 | -0.73676 |
| -0.72489 | -0.97305 | -0.68009 | -0.95832 | -0.72489 | -0.97305 | -0.71989 |
| -0.70744 | -0.96187 | -0.66328 | -0.95515 | -0.70744 | -0.96187 | -0.70182 |
| -0.68994 | -0.95398 | -0.64578 | -0.953   | -0.68994 | -0.95398 | -0.68416 |
| -0.67306 | -0.96123 | -0.62843 | -0.94757 | -0.67306 | -0.96123 | -0.66743 |
| -0.65553 | -0.97415 | -0.61192 | -0.94352 | -0.65553 | -0.97415 | -0.64976 |
| -0.63788 | -0.96486 | -0.59594 | -0.93892 | -0.63788 | -0.96486 | -0.63259 |
| -0.62092 | -0.96178 | -0.57921 | -0.93366 | -0.62092 | -0.96178 | -0.6159  |

|          |          |          |          |          |          |          |
|----------|----------|----------|----------|----------|----------|----------|
| -0.60536 | -0.96596 | -0.56135 | -0.92886 | -0.60536 | -0.96596 | -0.60028 |
| -0.58876 | -0.96228 | -0.5438  | -0.9208  | -0.58876 | -0.96228 | -0.58301 |
| -0.57091 | -0.97298 | -0.52675 | -0.91337 | -0.57091 | -0.97298 | -0.56549 |
| -0.55362 | -0.96472 | -0.5094  | -0.90794 | -0.55362 | -0.96472 | -0.548   |
| -0.53667 | -0.96435 | -0.4918  | -0.9011  | -0.53667 | -0.96435 | -0.53062 |
| -0.51926 | -0.95732 | -0.47464 | -0.89196 | -0.51926 | -0.95732 | -0.51334 |
| -0.50167 | -0.93388 | -0.45735 | -0.88148 | -0.50167 | -0.93388 | -0.49572 |
| -0.48407 | -0.93081 | -0.44032 | -0.87262 | -0.48407 | -0.93081 | -0.47852 |
| -0.46707 | -0.93732 | -0.42327 | -0.86257 | -0.46707 | -0.93732 | -0.46151 |
| -0.44985 | -0.92588 | -0.407   | -0.84921 | -0.44985 | -0.92588 | -0.44463 |
| -0.43279 | -0.92111 | -0.39077 | -0.83652 | -0.43279 | -0.92111 | -0.42742 |
| -0.417   | -0.93509 | -0.3735  | -0.82287 | -0.417   | -0.93509 | -0.41102 |
| -0.40024 | -0.92713 | -0.35581 | -0.80753 | -0.40024 | -0.92713 | -0.39429 |
| -0.38279 | -0.91483 | -0.33862 | -0.7915  | -0.38279 | -0.91483 | -0.37685 |
| -0.36548 | -0.92598 | -0.32183 | -0.7741  | -0.36548 | -0.92598 | -0.35968 |
| -0.34825 | -0.91444 | -0.30483 | -0.75642 | -0.34825 | -0.91444 | -0.34241 |
| -0.33101 | -0.9002  | -0.28777 | -0.73692 | -0.33101 | -0.9002  | -0.32541 |
| -0.31395 | -0.89543 | -0.27061 | -0.71631 | -0.31395 | -0.89543 | -0.30884 |
| -0.29699 | -0.87877 | -0.25279 | -0.69461 | -0.29699 | -0.87877 | -0.29151 |
| -0.27991 | -0.87056 | -0.23522 | -0.6707  | -0.27991 | -0.87056 | -0.2739  |
| -0.26231 | -0.8618  | -0.21751 | -0.64663 | -0.26231 | -0.8618  | -0.2564  |
| -0.24459 | -0.85573 | -0.20026 | -0.62146 | -0.24459 | -0.85573 | -0.23899 |
| -0.22725 | -0.84889 | -0.18344 | -0.5938  | -0.22725 | -0.84889 | -0.2217  |
| -0.20977 | -0.83919 | -0.16574 | -0.56363 | -0.20977 | -0.83919 | -0.20433 |
| -0.19266 | -0.82668 | -0.14783 | -0.5329  | -0.19266 | -0.82668 | -0.18698 |
| -0.17524 | -0.80554 | -0.13323 | -0.49931 | -0.17524 | -0.80554 | -0.16973 |
| -0.15749 | -0.78661 | -0.11777 | -0.46466 | -0.15749 | -0.78661 | -0.15223 |
| -0.14334 | -0.7635  | -0.10043 | -0.42821 | -0.14334 | -0.7635  | -0.13763 |
| -0.12743 | -0.73681 | -0.08357 | -0.38871 | -0.12743 | -0.73681 | -0.12183 |
| -0.10955 | -0.71389 | -0.06957 | -0.34682 | -0.10955 | -0.71389 | -0.10433 |
| -0.09306 | -0.69928 | -0.05321 | -0.30134 | -0.09306 | -0.69928 | -0.08724 |
| -0.07615 | -0.66112 | -0.0333  | -0.25484 | -0.07615 | -0.66112 | -0.07352 |
| -0.06086 | -0.60936 | -0.01449 | -0.20515 | -0.06086 | -0.60936 | -0.05659 |
| -0.04361 | -0.57968 | 0.00428  | -0.14972 | -0.04361 | -0.57968 | -0.0369  |
| -0.02421 | -0.52505 | 0.02539  | -0.0894  | -0.02421 | -0.52505 | -0.01818 |
| -0.00674 | -0.44065 | 0.0447   | -0.02654 | -0.00674 | -0.44065 | 5.60E-04 |
| 0.01215  | -0.35026 | 0.06153  | 0.03517  | 0.01215  | -0.35026 | 0.02173  |
| 0.03208  | -0.25299 | 0.07846  | 0.09557  | 0.03208  | -0.25299 | 0.04084  |
| 0.04964  | -0.15218 | 0.0956   | 0.15352  | 0.04964  | -0.15218 | 0.05732  |
| 0.06673  | -0.05203 | 0.11321  | 0.20987  | 0.06673  | -0.05203 | 0.07432  |
| 0.08418  | 0.03438  | 0.1309   | 0.26317  | 0.08418  | 0.03438  | 0.09195  |
| 0.10142  | 0.11555  | 0.14833  | 0.31322  | 0.10142  | 0.11555  | 0.10936  |
| 0.11905  | 0.19701  | 0.16482  | 0.36228  | 0.11905  | 0.19701  | 0.12651  |
| 0.13633  | 0.27812  | 0.18192  | 0.40668  | 0.13633  | 0.27812  | 0.14423  |
| 0.153    | 0.35643  | 0.19939  | 0.45022  | 0.153    | 0.35643  | 0.16126  |
| 0.17007  | 0.43364  | 0.21688  | 0.4927   | 0.17007  | 0.43364  | 0.17792  |
| 0.18738  | 0.5029   | 0.23484  | 0.53155  | 0.18738  | 0.5029   | 0.19492  |

|         |         |         |         |         |         |         |
|---------|---------|---------|---------|---------|---------|---------|
| 0.20447 | 0.57038 | 0.25258 | 0.56969 | 0.20447 | 0.57038 | 0.21276 |
| 0.22256 | 0.63803 | 0.26952 | 0.6059  | 0.22256 | 0.63803 | 0.2307  |
| 0.24071 | 0.6876  | 0.28627 | 0.63958 | 0.24071 | 0.6876  | 0.24864 |
| 0.25778 | 0.74417 | 0.30374 | 0.67049 | 0.25778 | 0.74417 | 0.26551 |
| 0.27479 | 0.79092 | 0.32151 | 0.69967 | 0.27479 | 0.79092 | 0.28255 |
| 0.29189 | 0.82554 | 0.33919 | 0.72627 | 0.29189 | 0.82554 | 0.29976 |
| 0.30952 | 0.85429 | 0.35647 | 0.75103 | 0.30952 | 0.85429 | 0.3175  |
| 0.3272  | 0.86638 | 0.3733  | 0.77531 | 0.3272  | 0.86638 | 0.33506 |
| 0.34417 | 0.88845 | 0.3903  | 0.79632 | 0.34417 | 0.88845 | 0.35205 |
| 0.36154 | 0.90443 | 0.40701 | 0.81474 | 0.36154 | 0.90443 | 0.36949 |
| 0.3787  | 0.89826 | 0.42339 | 0.8323  | 0.3787  | 0.89826 | 0.38631 |
| 0.39567 | 0.9068  | 0.44015 | 0.84782 | 0.39567 | 0.9068  | 0.40317 |
| 0.41207 | 0.9202  | 0.45691 | 0.86317 | 0.41207 | 0.9202  | 0.41941 |
| 0.42816 | 0.92144 | 0.4752  | 0.87649 | 0.42816 | 0.92144 | 0.43602 |
| 0.44501 | 0.94106 | 0.49361 | 0.88888 | 0.44501 | 0.94106 | 0.45283 |
| 0.46278 | 0.94755 | 0.51071 | 0.90058 | 0.46278 | 0.94755 | 0.47089 |
| 0.48131 | 0.92596 | 0.52761 | 0.90989 | 0.48131 | 0.92596 | 0.48965 |
| 0.49902 | 0.91998 | 0.54466 | 0.91851 | 0.49902 | 0.91998 | 0.50698 |
| 0.51582 | 0.9345  | 0.56221 | 0.92807 | 0.51582 | 0.9345  | 0.52346 |
| 0.53289 | 0.93912 | 0.57938 | 0.93663 | 0.53289 | 0.93912 | 0.54086 |
| 0.55028 | 0.9388  | 0.59633 | 0.94267 | 0.55028 | 0.9388  | 0.55832 |
| 0.56738 | 0.94184 | 0.61343 | 0.9495  | 0.56738 | 0.94184 | 0.57503 |
| 0.5846  | 0.93813 | 0.62976 | 0.95548 | 0.5846  | 0.93813 | 0.59253 |
| 0.60184 | 0.94661 | 0.64644 | 0.95969 | 0.60184 | 0.94661 | 0.60949 |
| 0.61835 | 0.96266 | 0.66368 | 0.9649  | 0.61835 | 0.96266 | 0.62557 |
| 0.63476 | 0.96514 | 0.68122 | 0.96978 | 0.63476 | 0.96514 | 0.64235 |
| 0.6515  | 0.95449 | 0.69913 | 0.97332 | 0.6515  | 0.95449 | 0.65998 |
| 0.66917 | 0.95498 | 0.71617 | 0.97688 | 0.66917 | 0.95498 | 0.67753 |
| 0.68715 | 0.96964 | 0.73286 | 0.98077 | 0.68715 | 0.96964 | 0.69524 |
| 0.70427 | 0.9651  | 0.7494  | 0.98355 | 0.70427 | 0.9651  | 0.71229 |
| 0.72109 | 0.95741 | 0.76669 | 0.98557 | 0.72109 | 0.95741 | 0.72853 |
| 0.73756 | 0.97146 | 0.78398 | 0.9889  | 0.73756 | 0.97146 | 0.74524 |
| 0.75428 | 0.97287 | 0.80112 | 0.99169 | 0.75428 | 0.97287 | 0.76261 |
| 0.772   | 0.97139 | 0.81849 | 0.99292 | 0.772   | 0.97139 | 0.77982 |
| 0.78952 | 0.97478 | 0.83606 | 0.99404 | 0.78952 | 0.97478 | 0.79689 |
| 0.80648 | 0.96768 | 0.85317 | 0.99535 | 0.80648 | 0.96768 | 0.81437 |
| 0.8241  | 0.97196 | 0.87009 | 0.99751 | 0.8241  | 0.97196 | 0.83163 |
| 0.84134 | 0.98554 | 0.88684 | 1.00141 | 0.84134 | 0.98554 | 0.84889 |
| 0.85826 | 0.97573 | 0.90391 | 1.00369 | 0.85826 | 0.97573 | 0.86613 |
| 0.87518 | 0.95973 | 0.92129 | 1.00409 | 0.87518 | 0.95973 | 0.88322 |
| 0.89222 | 0.9705  | 0.93887 | 1.00387 | 0.89222 | 0.9705  | 0.89985 |
| 0.9095  | 0.98685 | 0.95596 | 1.00452 | 0.9095  | 0.98685 | 0.91713 |
| 0.92707 | 0.99017 | 0.97291 | 1.00558 | 0.92707 | 0.99017 | 0.93486 |
| 0.94456 | 0.98484 | 0.98977 | 1.00588 | 0.94456 | 0.98484 | 0.952   |
| 0.96114 | 0.97499 | 1.17165 | 1.00649 | 0.96114 | 0.97499 | 0.96902 |
| 0.97798 | 0.98304 | 1.18927 | 1.01234 | 0.97798 | 0.98304 | 0.98589 |
| 0.99521 | 1.00814 | 1.20677 | 1.01251 | 0.99521 | 1.00814 | 1.00262 |

|         |         |         |         |         |         |         |
|---------|---------|---------|---------|---------|---------|---------|
| 1.01235 | 1.00353 | 1.22321 | 1.01134 | 1.01235 | 1.00353 | 1.02023 |
| 1.02976 | 0.98883 | 1.23991 | 1.01288 | 1.02976 | 0.98883 | 1.03757 |
| 1.04699 | 0.98845 | 1.25703 | 1.01334 | 1.04699 | 0.98845 | 1.05452 |
| 1.06431 | 0.99608 | 1.27464 | 1.014   | 1.06431 | 0.99608 | 1.07206 |
| 1.08147 | 1.00002 | 1.29207 | 1.016   | 1.08147 | 1.00002 | 1.08921 |
| 1.09854 | 0.99505 | 1.30932 | 1.01506 | 1.09854 | 0.99505 | 1.10609 |
| 1.11563 | 0.98577 | 1.32521 | 1.01474 | 1.11563 | 0.98577 | 1.12339 |
| 1.13317 | 0.98864 | 1.34155 | 1.01436 | 1.13317 | 0.98864 | 1.14113 |
| 1.15086 | 0.99758 | 1.35819 | 1.01412 | 1.15086 | 0.99758 | 1.15875 |
| 1.16804 | 0.99651 | 1.37427 | 1.01594 | 1.16804 | 0.99651 | 1.17659 |
| 1.18578 | 1.00227 | 1.39072 | 1.01628 | 1.18578 | 1.00227 | 1.19415 |
| 1.20364 | 1.00926 | 1.4086  | 1.01529 | 1.20364 | 1.00926 | 1.21088 |
| 1.21976 | 1.00998 | 1.42767 | 1.01633 | 1.21976 | 1.00998 | 1.22755 |
| 1.23641 | 0.99121 | 1.44563 | 1.01539 | 1.23641 | 0.99121 | 1.24445 |
| 1.25365 | 0.98488 | 1.4633  | 1.01423 | 1.25365 | 0.98488 | 1.26153 |
| 1.27124 | 0.99297 | 1.48062 | 1.01433 | 1.27124 | 0.99297 | 1.27921 |
| 1.28861 | 0.991   | 1.49751 | 1.01388 | 1.28861 | 0.991   | 1.29677 |
| 1.30597 | 0.99068 | 1.51476 | 1.01364 | 1.30597 | 0.99068 | 1.31306 |
| 1.32195 | 0.99096 | 1.53296 | 1.01214 | 1.32195 | 0.99096 | 1.32916 |
| 1.33808 | 1.00108 | 1.55161 | 1.01206 | 1.33808 | 1.00108 | 1.34566 |
| 1.35461 | 0.99833 | 1.56996 | 1.01359 | 1.35461 | 0.99833 | 1.36199 |
| 1.37108 | 0.99821 | 1.58846 | 1.01293 | 1.37108 | 0.99821 | 1.37858 |
| 1.38757 | 0.99476 | 1.60658 | 1.01237 | 1.38757 | 0.99476 | 1.39488 |
| 1.4058  | 0.98124 | 1.6198  | 1.01284 | 1.4058  | 0.98124 | 1.41372 |
| 1.42488 | 0.99365 | 1.63509 | 1.01192 | 1.42488 | 0.99365 | 1.43321 |
| 1.44244 | 0.99324 | 1.65281 | 1.01144 | 1.44244 | 0.99324 | 1.45063 |
| 1.45985 | 0.99239 | 1.67077 | 1.01053 | 1.45985 | 0.99239 | 1.46762 |
| 1.47729 | 0.99304 | 1.68896 | 1.00985 | 1.47729 | 0.99304 | 1.48502 |
| 1.49425 | 0.99031 | 1.70639 | 1.01023 | 1.49425 | 0.99031 | 1.50204 |
| 1.51125 | 0.99961 | 1.72149 | 1.0124  | 1.51125 | 0.99961 | 1.5198  |
| 1.52931 | 0.99758 | 1.73738 | 1.01459 | 1.52931 | 0.99758 | 1.53797 |
| 1.54764 | 0.99778 | 1.75394 | 1.01318 | 1.54764 | 0.99778 | 1.55614 |
| 1.56632 | 1.0066  | 1.77041 | 1.01225 | 1.56632 | 1.0066  | 1.57494 |
| 1.58494 | 1.01061 | 1.78727 | 1.01174 | 1.58494 | 1.01061 | 1.5935  |
| 1.60291 | 1.00796 | 1.80417 | 1.01101 | 1.60291 | 1.00796 | 1.6085  |
| 1.61682 | 1.01063 | 1.82306 | 1.01093 | 1.61682 | 1.01063 | 1.62319 |
| 1.63155 | 1.0036  | 1.842   | 1.01067 | 1.63155 | 1.0036  | 1.63994 |
| 1.64947 | 1.00562 | 1.85947 | 1.01204 | 1.64947 | 1.00562 | 1.65745 |
| 1.66729 | 0.99634 | 1.87704 | 1.01054 | 1.66729 | 0.99634 | 1.67536 |
| 1.6849  | 0.98787 | 1.89457 | 1.00857 | 1.6849  | 0.98787 | 1.69363 |
| 1.70292 | 1.00068 | 1.91014 | 1.00788 | 1.70292 | 1.00068 | 1.71085 |
| 1.71838 | 1.00441 | 1.92678 | 1.00734 | 1.71838 | 1.00441 | 1.72616 |
| 1.73378 | 1.00995 | 1.9447  | 1.00727 | 1.73378 | 1.00995 | 1.74164 |
| 1.7507  | 1.00649 | 1.96198 | 1.00647 | 1.7507  | 1.00649 | 1.75792 |
| 1.76721 | 1.00947 | 1.97979 | 1.00655 | 1.76721 | 1.00947 | 1.77473 |
| 1.7839  | 1.00655 | 1.99739 | 1.00718 | 1.7839  | 1.00655 | 1.79151 |
| 1.80153 | 1.00006 | 2.01028 | 1.00736 | 1.80153 | 1.00006 | 1.80985 |

|         |            |         |         |         |         |         |
|---------|------------|---------|---------|---------|---------|---------|
| 1.82028 | 1.00107    | 2.0151  | 1.00731 | 1.82028 | 1.00107 | 1.82902 |
| 1.83873 | 1.00212    | 2.01643 | 1.00623 | 1.83873 | 1.00212 | 1.84699 |
| 1.85621 | 1.00902    | 2.0168  | 1.00677 | 1.85621 | 1.00902 | 1.86444 |
| 1.87345 | 1.00358    | 2.01692 | 1.00685 | 1.87345 | 1.00358 | 1.88209 |
| 1.89133 | 0.99868    | 2.01697 | 1.00656 | 1.89133 | 0.99868 | 1.89942 |
| 1.90731 | 0.99782    | 2.017   | 1.00655 | 1.90731 | 0.99782 | 1.91486 |
| 1.9232  | 0.98739    | 2.01698 | 1.00486 | 1.9232  | 0.98739 | 1.93155 |
| 1.94103 | 0.99191    | 2.017   | 1.00389 | 1.94103 | 0.99191 | 1.94922 |
| 1.95865 | 1.01208    | 2.01436 | 1.00272 | 1.95865 | 1.01208 | 1.96657 |
| 1.97645 | 1.01157 -- | --      | --      | 1.97645 | 1.01157 | 1.98445 |
| 1.99427 | 1.0001 --  | --      | --      | 1.99427 | 1.0001  | 2.00029 |
| 2.00589 | 0.99063 -- | --      | --      | 2.00589 | 0.99063 | 2.00801 |
| 2.0105  | 0.98138 -- | --      | --      | 2.0105  | 0.98138 | 2.01023 |
| 2.01167 | 0.99184 -- | --      | --      | 2.01167 | 0.99184 | 2.01083 |
| 2.01201 | 0.99572 -- | --      | --      | 2.01201 | 0.99572 | 2.01104 |
| 2.01211 | 0.99313 -- | --      | --      | 2.01211 | 0.99313 | 2.01108 |
| 2.01215 | 0.99628 -- | --      | --      | 2.01215 | 0.99628 | 2.01113 |
| 2.01217 | 1.00762 -- | --      | --      | 2.01217 | 1.00762 | 2.01118 |
| 2.01216 | 1.01229 -- | --      | --      | 2.01216 | 1.01229 | 2.01118 |
| 2.01167 | 0.99184 -- | --      | --      | 2.01167 | 0.99184 |         |
| 2.01201 | 0.99572 -- | --      | --      | 2.01201 | 0.99572 |         |
| 2.01211 | 0.99313 -- | --      | --      | 2.01211 | 0.99313 |         |
| 2.01215 | 0.99628 -- | --      | --      | 2.01215 | 0.99628 |         |
| 2.01217 | 1.00762 -- | --      | --      | 2.01217 | 1.00762 |         |
| 2.01216 | 1.01229 -- | --      | --      | 2.01216 | 1.01229 |         |
| 2.01215 | 0.99332 -- | --      | --      | 2.01215 | 0.99332 |         |

| T10K-PA | moH     | T20K-PA | moH     | T40K-PA | moH     | T50K-PA |
|---------|---------|---------|---------|---------|---------|---------|
| 0.9965  | 2.01201 | 1.00464 | 2.01237 | 0.9949  | 2.00999 | 0.99819 |
| 1.00221 | 2.01202 | 1.01351 | 2.01235 | 1.00304 | 2.00997 | 0.993   |
| 1.00894 | 2.01206 | 1.0084  | 2.01232 | 1.01311 | 2.00997 | 1.0046  |
| 1.00864 | 2.01079 | 1.01525 | 2.01236 | 1.00525 | 2.00918 | 1.00502 |
| 1.00302 | 2.00212 | 1.00482 | 2.0123  | 0.9966  | 2.00163 | 1.00527 |
| 0.99216 | 1.98723 | 1.00234 | 2.00826 | 0.98858 | 1.98693 | 1.00797 |
| 0.99362 | 1.96995 | 0.99955 | 1.99593 | 0.99409 | 1.97003 | 1.00105 |
| 0.99123 | 1.95292 | 0.98938 | 1.9794  | 1.00312 | 1.95297 | 0.99027 |
| 0.98798 | 1.93558 | 0.99587 | 1.9623  | 0.99829 | 1.93577 | 0.99476 |
| 0.99504 | 1.9185  | 0.99438 | 1.94491 | 0.9956  | 1.91843 | 1.00542 |
| 1.00037 | 1.9028  | 0.99656 | 1.92743 | 0.99988 | 1.90293 | 1.00968 |
| 1.00802 | 1.88665 | 0.99911 | 1.91232 | 1.00909 | 1.88667 | 1.00288 |
| 1.00933 | 1.869   | 0.99068 | 1.8964  | 0.99848 | 1.8692  | 0.98961 |
| 1.00294 | 1.85167 | 0.98553 | 1.87855 | 0.99995 | 1.85171 | 0.99228 |
| 0.99313 | 1.83408 | 0.99739 | 1.86134 | 1.01556 | 1.83431 | 1.00921 |
| 0.99383 | 1.81496 | 0.99744 | 1.84373 | 1.00087 | 1.81523 | 0.99677 |
| 0.98595 | 1.79643 | 0.97974 | 1.82606 | 0.97663 | 1.79652 | 0.97206 |
| 0.98253 | 1.77948 | 0.98711 | 1.80725 | 0.97015 | 1.7796  | 0.98172 |
| 0.98379 | 1.76309 | 0.99672 | 1.7891  | 0.97961 | 1.76289 | 0.99311 |
| 0.98714 | 1.74654 | 0.99865 | 1.77205 | 0.97613 | 1.74631 | 0.996   |
| 0.99223 | 1.72978 | 1.00462 | 1.75552 | 0.97683 | 1.72963 | 0.98604 |
| 0.99955 | 1.71477 | 1.00681 | 1.73897 | 0.98854 | 1.71474 | 0.99067 |
| 1.00282 | 1.6988  | 0.99739 | 1.724   | 1.00309 | 1.69894 | 0.99934 |
| 0.99211 | 1.68083 | 1.00042 | 1.70816 | 1.00908 | 1.68087 | 0.99027 |
| 0.99543 | 1.66289 | 0.98918 | 1.69081 | 0.99924 | 1.66293 | 0.98379 |
| 1.0034  | 1.64502 | 0.98614 | 1.67264 | 0.98911 | 1.64494 | 0.98154 |
| 0.99854 | 1.62733 | 0.99932 | 1.65458 | 0.98893 | 1.62692 | 0.99429 |
| 0.99377 | 1.61381 | 0.99258 | 1.63697 | 0.99843 | 1.6135  | 1.00458 |
| 0.99943 | 1.59858 | 0.9892  | 1.62073 | 0.9944  | 1.59883 | 1.00125 |
| 1.00822 | 1.58029 | 1.00522 | 1.60647 | 0.99451 | 1.58031 | 0.99711 |
| 1.01059 | 1.5617  | 1.00371 | 1.59052 | 1.0066  | 1.5619  | 0.99171 |
| 1.00278 | 1.54311 | 0.9994  | 1.57189 | 1.01467 | 1.54334 | 0.98466 |
| 0.99877 | 1.52448 | 0.99996 | 1.55347 | 1.00226 | 1.5246  | 0.99153 |
| 0.99704 | 1.50681 | 1.00443 | 1.53485 | 0.98312 | 1.50694 | 0.9996  |
| 0.989   | 1.48992 | 1.00717 | 1.51671 | 0.99244 | 1.49006 | 0.99554 |
| 0.984   | 1.47264 | 1.00915 | 1.49934 | 0.9969  | 1.47275 | 0.99574 |
| 0.98693 | 1.45558 | 1.00523 | 1.48219 | 0.98853 | 1.45555 | 0.99835 |
| 0.98886 | 1.43826 | 1.00457 | 1.46495 | 0.99337 | 1.43846 | 1.01011 |
| 0.98793 | 1.4196  | 1.00371 | 1.44777 | 1.00784 | 1.41987 | 1.00813 |
| 0.99894 | 1.4004  | 0.99752 | 1.4303  | 1.00129 | 1.40059 | 0.98614 |
| 0.99862 | 1.38317 | 1.00548 | 1.41041 | 0.98891 | 1.38304 | 0.98847 |
| 0.99436 | 1.36674 | 1.00708 | 1.39202 | 0.99447 | 1.36674 | 0.99033 |
| 0.98678 | 1.35037 | 1.01477 | 1.37575 | 0.99034 | 1.35028 | 0.97592 |
| 0.98162 | 1.33381 | 1.01534 | 1.3594  | 0.98867 | 1.33393 | 0.97552 |
| 0.99656 | 1.31824 | 1.01234 | 1.34305 | 0.99614 | 1.31813 | 0.99412 |
| 1.0049  | 1.30185 | 1.00859 | 1.32662 | 0.99794 | 1.30169 | 1.01312 |

|         |         |         |         |         |         |         |
|---------|---------|---------|---------|---------|---------|---------|
| 1.00364 | 1.28447 | 1.00287 | 1.31091 | 1.00442 | 1.28435 | 1       |
| 0.99367 | 1.26695 | 0.99315 | 1.29409 | 1.0114  | 1.26708 | 0.99526 |
| 0.98626 | 1.24954 | 0.99017 | 1.27653 | 1.00714 | 1.24937 | 0.99906 |
| 0.99349 | 1.23205 | 0.98701 | 1.25895 | 0.98227 | 1.23184 | 0.99516 |
| 1.0012  | 1.21583 | 0.98486 | 1.24157 | 0.97926 | 1.21583 | 1.00007 |
| 1.0043  | 1.19909 | 0.99242 | 1.22521 | 0.99963 | 1.19921 | 1.00207 |
| 1.01374 | 1.18167 | 1.00283 | 1.20885 | 1.0011  | 1.18171 | 1.00742 |
| 1.0105  | 1.16361 | 1       | 1.19126 | 0.9991  | 1.16381 | 1.00204 |
| 1.00647 | 1.14583 | 0.98668 | 1.1734  | 1.00177 | 1.14598 | 0.99598 |
| 1.00197 | 1.12825 | 0.98544 | 1.15554 | 1.00975 | 1.12838 | 0.99792 |
| 0.99051 | 1.11086 | 1.00362 | 1.13814 | 0.99706 | 1.11095 | 1.00863 |
| 0.99176 | 1.09364 | 1.00774 | 1.12067 | 0.98988 | 1.0936  | 0.99604 |
| 0.99208 | 1.07662 | 0.98903 | 1.10336 | 1.00173 | 1.07662 | 0.98882 |
| 0.99387 | 1.05924 | 0.98851 | 1.08604 | 0.99744 | 1.05938 | 0.99937 |
| 0.99567 | 1.04173 | 0.99297 | 1.06892 | 0.9917  | 1.04187 | 0.99925 |
| 0.99468 | 1.02464 | 1.00558 | 1.05155 | 0.98422 | 1.02474 | 1.00542 |
| 1.00412 | 1.00759 | 1.00263 | 1.03439 | 0.98305 | 1.00727 | 1.00351 |
| 0.99555 | 0.99028 | 0.99111 | 1.01696 | 0.98882 | 0.99015 | 1.00008 |
| 0.97482 | 0.97343 | 0.99178 | 0.99966 | 0.9987  | 0.97311 | 0.99966 |
| 0.97776 | 0.95658 | 0.99299 | 0.98256 | 0.98968 | 0.95622 | 0.99831 |
| 0.99539 | 0.9392  | 0.9977  | 0.96591 | 0.98355 | 0.93946 | 0.99633 |
| 1.001   | 0.92167 | 0.9925  | 0.94911 | 0.99415 | 0.92187 | 0.99517 |
| 0.98648 | 0.90448 | 0.99062 | 0.93197 | 0.99561 | 0.90433 | 0.9951  |
| 0.98023 | 0.88738 | 0.99257 | 0.9138  | 0.99178 | 0.88723 | 0.99635 |
| 0.97798 | 0.87036 | 0.9926  | 0.89656 | 0.98032 | 0.87034 | 0.99275 |
| 0.991   | 0.85312 | 0.99301 | 0.88008 | 0.98005 | 0.85324 | 0.99591 |
| 1.00181 | 0.83614 | 0.98364 | 0.86274 | 0.99112 | 0.83638 | 1.0046  |
| 0.99745 | 0.81859 | 0.98619 | 0.84571 | 0.98782 | 0.81888 | 0.99966 |
| 1.00073 | 0.80133 | 0.9846  | 0.82862 | 0.99022 | 0.80144 | 0.98797 |
| 1.0054  | 0.78444 | 0.98097 | 0.81111 | 0.97984 | 0.78447 | 0.98557 |
| 0.99202 | 0.76673 | 0.98766 | 0.79398 | 0.97481 | 0.76683 | 0.99673 |
| 0.98146 | 0.74918 | 0.99662 | 0.77692 | 0.98963 | 0.74927 | 1.00986 |
| 0.97186 | 0.73268 | 0.99596 | 0.75928 | 0.99711 | 0.73269 | 1.00665 |
| 0.96978 | 0.71622 | 0.98097 | 0.74212 | 0.9952  | 0.71614 | 0.9974  |
| 0.97224 | 0.69935 | 0.98942 | 0.72556 | 0.98303 | 0.69914 | 0.99    |
| 0.95589 | 0.68192 | 0.99294 | 0.70892 | 0.97939 | 0.68205 | 0.98967 |
| 0.969   | 0.66383 | 0.98654 | 0.69175 | 0.9844  | 0.66375 | 0.98628 |
| 0.98726 | 0.64623 | 0.9868  | 0.67354 | 0.99109 | 0.64623 | 0.97058 |
| 0.98032 | 0.62945 | 0.98602 | 0.65549 | 0.98708 | 0.62964 | 0.96202 |
| 0.97969 | 0.6132  | 0.99805 | 0.63848 | 0.97602 | 0.61326 | 0.96087 |
| 0.97619 | 0.5964  | 0.99393 | 0.62239 | 0.97861 | 0.59665 | 0.97866 |
| 0.96981 | 0.57872 | 0.9851  | 0.6058  | 0.97633 | 0.57894 | 0.97471 |
| 0.96429 | 0.5618  | 0.99526 | 0.5887  | 0.96035 | 0.56205 | 0.95996 |
| 0.95716 | 0.54465 | 0.99242 | 0.57169 | 0.95427 | 0.54494 | 0.95698 |
| 0.96422 | 0.52732 | 0.9677  | 0.55456 | 0.95478 | 0.52738 | 0.95462 |
| 0.96536 | 0.51051 | 0.96463 | 0.53677 | 0.95548 | 0.51057 | 0.97443 |
| 0.96581 | 0.49337 | 0.96635 | 0.51988 | 0.95571 | 0.49366 | 0.97914 |



|          |          |          |          |          |          |          |
|----------|----------|----------|----------|----------|----------|----------|
| 0.96568  | 0.47532  | 0.96083  | 0.50294  | 0.96368  | 0.47558  | 0.96266  |
| 0.96185  | 0.45717  | 0.95421  | 0.48544  | 0.95546  | 0.45716  | 0.95569  |
| 0.95441  | 0.43959  | 0.94715  | 0.4667   | 0.95009  | 0.43953  | 0.95146  |
| 0.95168  | 0.42264  | 0.94591  | 0.44886  | 0.95588  | 0.42284  | 0.94125  |
| 0.94938  | 0.40575  | 0.94766  | 0.43204  | 0.94773  | 0.4058   | 0.9468   |
| 0.93938  | 0.38933  | 0.94057  | 0.41514  | 0.9689   | 0.38898  | 0.94915  |
| 0.94012  | 0.37237  | 0.93955  | 0.39861  | 0.95994  | 0.37207  | 0.93887  |
| 0.93397  | 0.35565  | 0.95467  | 0.38182  | 0.92963  | 0.35504  | 0.92928  |
| 0.91694  | 0.33844  | 0.93689  | 0.36473  | 0.94099  | 0.33791  | 0.91209  |
| 0.90881  | 0.32075  | 0.91861  | 0.34784  | 0.94342  | 0.32043  | 0.91343  |
| 0.90869  | 0.3034   | 0.9112   | 0.33047  | 0.93371  | 0.30284  | 0.91445  |
| 0.89133  | 0.28589  | 0.9004   | 0.31274  | 0.92242  | 0.28552  | 0.89267  |
| 0.87954  | 0.26905  | 0.87822  | 0.2951   | 0.90171  | 0.26834  | 0.8912   |
| 0.87345  | 0.25199  | 0.86324  | 0.27786  | 0.88113  | 0.25151  | 0.89312  |
| 0.8688   | 0.23431  | 0.86613  | 0.26111  | 0.87228  | 0.23413  | 0.87731  |
| 0.85926  | 0.21632  | 0.8641   | 0.24402  | 0.88164  | 0.21637  | 0.86551  |
| 0.84342  | 0.19881  | 0.86714  | 0.226    | 0.87366  | 0.19855  | 0.84728  |
| 0.82952  | 0.18136  | 0.84854  | 0.20813  | 0.85599  | 0.18097  | 0.81915  |
| 0.8108   | 0.16413  | 0.80744  | 0.19069  | 0.84229  | 0.1637   | 0.79943  |
| 0.78682  | 0.14689  | 0.78909  | 0.17332  | 0.82361  | 0.1467   | 0.77716  |
| 0.77048  | 0.12928  | 0.77418  | 0.15626  | 0.80296  | 0.12909  | 0.74306  |
| 0.73686  | 0.11139  | 0.74088  | 0.13892  | 0.77095  | 0.11113  | 0.72129  |
| 0.69969  | 0.09362  | 0.69398  | 0.12124  | 0.74467  | 0.09347  | 0.69479  |
| 0.65714  | 0.07579  | 0.65275  | 0.10322  | 0.71709  | 0.07575  | 0.64079  |
| 0.60685  | 0.05826  | 0.61949  | 0.08552  | 0.6793   | 0.05798  | 0.58803  |
| 0.55833  | 0.04129  | 0.57257  | 0.06767  | 0.62483  | 0.0412   | 0.5362   |
| 0.49198  | 0.02508  | 0.50056  | 0.0504   | 0.56593  | 0.02468  | 0.47077  |
| 0.4169   | 0.005    | 0.4192   | 0.03367  | 0.50938  | 0.00475  | 0.3763   |
| 0.32907  | -0.01511 | 0.32878  | 0.01436  | 0.43083  | -0.01559 | 0.27087  |
| 0.22722  | -0.0337  | 0.20264  | -0.0052  | 0.35185  | -0.03408 | 0.16646  |
| 0.13412  | -0.0533  | 0.11124  | -0.02337 | 0.25336  | -0.05361 | 0.05912  |
| 0.04488  | -0.06839 | 0.02712  | -0.04265 | 0.13679  | -0.06949 | -0.04738 |
| -0.04981 | -0.08335 | -0.08194 | -0.06208 | 0.02436  | -0.08471 | -0.14576 |
| -0.12536 | -0.10012 | -0.17737 | -0.07704 | -0.07895 | -0.10067 | -0.24276 |
| -0.19178 | -0.11694 | -0.259   | -0.09124 | -0.16398 | -0.11741 | -0.32883 |
| -0.28077 | -0.13419 | -0.34497 | -0.10778 | -0.25321 | -0.13468 | -0.39562 |
| -0.36226 | -0.15199 | -0.43048 | -0.12463 | -0.33143 | -0.15258 | -0.48326 |
| -0.42247 | -0.1657  | -0.48958 | -0.14211 | -0.41733 | -0.16737 | -0.56943 |
| -0.49693 | -0.18141 | -0.54207 | -0.15664 | -0.48931 | -0.18251 | -0.62463 |
| -0.56169 | -0.19864 | -0.61363 | -0.17211 | -0.55587 | -0.1996  | -0.6815  |
| -0.62749 | -0.21584 | -0.68244 | -0.18937 | -0.62802 | -0.21673 | -0.74907 |
| -0.70503 | -0.23334 | -0.72498 | -0.20645 | -0.67285 | -0.23405 | -0.81485 |
| -0.75613 | -0.25089 | -0.7815  | -0.22362 | -0.73042 | -0.25174 | -0.86085 |
| -0.7972  | -0.26816 | -0.84301 | -0.2413  | -0.79362 | -0.26933 | -0.88949 |
| -0.83568 | -0.28572 | -0.86687 | -0.25883 | -0.8347  | -0.28684 | -0.91937 |
| -0.86853 | -0.30285 | -0.8863  | -0.27643 | -0.87023 | -0.30381 | -0.93567 |
| -0.8981  | -0.31987 | -0.91018 | -0.29384 | -0.8935  | -0.32037 | -0.94829 |

|          |          |          |          |          |          |          |
|----------|----------|----------|----------|----------|----------|----------|
| -0.9182  | -0.33704 | -0.92712 | -0.31077 | -0.9021  | -0.33764 | -0.9501  |
| -0.92707 | -0.35415 | -0.95791 | -0.3276  | -0.92046 | -0.35473 | -0.95926 |
| -0.93253 | -0.37145 | -0.95583 | -0.34463 | -0.92244 | -0.37196 | -0.97491 |
| -0.93782 | -0.38854 | -0.93883 | -0.36185 | -0.92833 | -0.38944 | -0.96958 |
| -0.95604 | -0.40572 | -0.95139 | -0.37927 | -0.95384 | -0.40646 | -0.96436 |
| -0.96673 | -0.42317 | -0.96664 | -0.3963  | -0.95617 | -0.42396 | -0.97546 |
| -0.96304 | -0.4403  | -0.96801 | -0.4137  | -0.9506  | -0.44085 | -0.99597 |
| -0.94935 | -0.45759 | -0.97485 | -0.43094 | -0.9505  | -0.4582  | -1.01194 |
| -0.95772 | -0.47357 | -0.97335 | -0.44801 | -0.95717 | -0.47474 | -0.99803 |
| -0.99143 | -0.48984 | -0.96461 | -0.46413 | -0.96435 | -0.49112 | -0.98921 |
| -0.99875 | -0.50753 | -0.96904 | -0.48072 | -0.96915 | -0.50857 | -0.99522 |
| -0.98723 | -0.52496 | -0.96802 | -0.49772 | -0.97207 | -0.52616 | -0.99926 |
| -0.98395 | -0.54186 | -0.96914 | -0.51556 | -0.97711 | -0.54317 | -1.01841 |
| -1.00368 | -0.55927 | -0.97584 | -0.53305 | -0.97578 | -0.56052 | -1.01623 |
| -1.0099  | -0.57694 | -0.9871  | -0.55019 | -0.97446 | -0.57831 | -1.01651 |
| -0.99665 | -0.59446 | -0.99905 | -0.56756 | -0.98131 | -0.59552 | -1.02974 |
| -1.00764 | -0.6103  | -0.99332 | -0.5854  | -0.98881 | -0.61154 | -1.02048 |
| -1.02126 | -0.62642 | -0.98955 | -0.60211 | -0.97741 | -0.62787 | -1.01585 |
| -1.00746 | -0.64321 | -0.99252 | -0.61791 | -0.95818 | -0.64451 | -1.01895 |
| -0.9895  | -0.66078 | -0.99803 | -0.63469 | -0.97218 | -0.66191 | -1.01111 |
| -0.99058 | -0.67822 | -0.99835 | -0.65206 | -0.97571 | -0.67928 | -1.02239 |
| -1.00131 | -0.69529 | -0.9949  | -0.6691  | -0.97272 | -0.69636 | -1.04028 |
| -0.99964 | -0.7131  | -0.98369 | -0.68613 | -0.97859 | -0.71404 | -1.02791 |
| -0.99682 | -0.7306  | -0.97733 | -0.70395 | -0.97653 | -0.73176 | -1.02788 |
| -1.01247 | -0.74729 | -0.98446 | -0.72151 | -0.97393 | -0.74849 | -1.0383  |
| -1.0133  | -0.76434 | -0.98992 | -0.7389  | -0.97895 | -0.76557 | -1.0377  |
| -1.00489 | -0.78172 | -0.99435 | -0.75542 | -0.98862 | -0.78267 | -1.02606 |
| -1.00759 | -0.79827 | -0.99934 | -0.77247 | -0.98914 | -0.79979 | -1.01429 |
| -1.00797 | -0.81525 | -0.99638 | -0.78983 | -0.98205 | -0.81673 | -1.01346 |
| -0.99515 | -0.83282 | -0.99298 | -0.80661 | -0.9745  | -0.834   | -1.02131 |
| -1.01343 | -0.84981 | -1.00963 | -0.82356 | -0.98583 | -0.85116 | -1.02244 |
| -1.01866 | -0.86712 | -1.00917 | -0.84105 | -1.00267 | -0.86841 | -1.02278 |
| -1.00342 | -0.88458 | -1.00404 | -0.85821 | -1.00359 | -0.88567 | -1.02427 |
| -1.01001 | -0.9009  | -0.99507 | -0.87541 | -1.00046 | -0.90255 | -1.02177 |
| -1.00769 | -0.91746 | -0.99271 | -0.89263 | -0.99584 | -0.919   | -1.01998 |
| -1.00081 | -0.93467 | -1.00393 | -0.90923 | -1.00138 | -0.93586 | -1.02184 |
| -0.99518 | -0.95245 | -0.99447 | -0.92576 | -0.9981  | -0.95372 | -1.03208 |
| -0.99707 | -0.97071 | -0.99811 | -0.94321 | -0.99109 | -0.97206 | -1.03181 |
| -1.01015 | -0.98836 | -1.00795 | -0.96132 | -1.0017  | -0.98983 | -1.01799 |
| -1.01192 | -1.00406 | -1.00485 | -0.9795  | -0.99145 | -1.00595 | -1.02723 |
| -1.00672 | -1.02064 | -0.99852 | -0.99629 | -0.99517 | -1.02199 | -1.02329 |
| -1.01465 | -1.03791 | -0.98205 | -1.0125  | -0.9986  | -1.03917 | -1.02302 |
| -1.00608 | -1.05449 | -0.98486 | -1.02905 | -0.99496 | -1.0559  | -1.03786 |
| -1.01007 | -1.07155 | -1.00793 | -1.04598 | -0.99503 | -1.07291 | -1.03037 |
| -1.00844 | -1.08857 | -1.01078 | -1.06287 | -1.00575 | -1.08962 | -1.01851 |
| -0.99755 | -1.10615 | -1.0027  | -1.07992 | -1.01732 | -1.10758 | -1.02653 |
| -1.02044 | -1.12425 | -1.00437 | -1.09755 | -0.99361 | -1.12539 | -1.02552 |

|          |          |          |          |          |          |          |
|----------|----------|----------|----------|----------|----------|----------|
| -1.02815 | -1.14176 | -1.01373 | -1.11527 | -0.98612 | -1.14266 | -1.02346 |
| -1.02636 | -1.15917 | -1.00364 | -1.13273 | -0.99245 | -1.15995 | -1.01954 |
| -1.03395 | -1.17656 | -0.99218 | -1.15018 | -0.98994 | -1.17761 | -1.01061 |
| -1.02511 | -1.19332 | -1.00673 | -1.16745 | -0.99777 | -1.19486 | -1.0071  |
| -1.01322 | -1.2097  | -1.00737 | -1.18485 | -1.01598 | -1.21091 | -1.00717 |
| -1.01707 | -1.2266  | -1.00273 | -1.2011  | -1.02557 | -1.2276  | -1.02318 |
| -1.02317 | -1.24351 | -1.00203 | -1.21757 | -1.0101  | -1.2447  | -1.03335 |
| -1.00622 | -1.2604  | -1.00566 | -1.23493 | -0.99285 | -1.26216 | -1.02332 |
| -0.99997 | -1.27779 | -1.01009 | -1.25173 | -0.99795 | -1.27951 | -1.01979 |
| -1.01188 | -1.29556 | -1.01137 | -1.26901 | -1.00101 | -1.29694 | -1.02973 |
| -1.01212 | -1.3131  | -1.00789 | -1.2862  | -0.98179 | -1.31448 | -1.02678 |
| -1.00759 | -1.33097 | -0.99995 | -1.30399 | -0.9792  | -1.3324  | -1.02192 |
| -1.01483 | -1.34872 | -1.00009 | -1.3219  | -0.99577 | -1.35015 | -1.02201 |
| -1.03117 | -1.36653 | -1.01628 | -1.33976 | -1.00069 | -1.36808 | -1.03323 |
| -1.03536 | -1.38452 | -1.02055 | -1.35741 | -1.00317 | -1.3859  | -1.04022 |
| -1.03269 | -1.39993 | -1.02045 | -1.37525 | -1.00229 | -1.4015  | -1.03688 |
| -1.02495 | -1.41545 | -1.02001 | -1.39331 | -1.00714 | -1.41699 | -1.03917 |
| -1.01483 | -1.43293 | -1.01424 | -1.40819 | -1.01465 | -1.43423 | -1.04378 |
| -1.00672 | -1.45008 | -1.01199 | -1.42404 | -1.00706 | -1.45145 | -1.02707 |
| -0.99136 | -1.46745 | -1.00791 | -1.44129 | -0.99742 | -1.46841 | -1.01652 |
| -0.99292 | -1.48451 | -1.00215 | -1.45847 | -1.00179 | -1.48589 | -1.02445 |
| -1.01296 | -1.5016  | -0.99182 | -1.47571 | -1.00353 | -1.50281 | -1.02864 |
| -1.02938 | -1.51902 | -0.99509 | -1.49283 | -1.00852 | -1.52016 | -1.02685 |
| -1.02602 | -1.53661 | -1.0001  | -1.50993 | -1.00557 | -1.53804 | -1.02222 |
| -1.01526 | -1.55406 | -1.01077 | -1.52763 | -1.00009 | -1.55543 | -1.02871 |
| -1.01723 | -1.57173 | -1.02378 | -1.5452  | -0.99273 | -1.57275 | -1.03892 |
| -1.01113 | -1.58878 | -1.01028 | -1.5628  | -0.99205 | -1.59022 | -1.03604 |
| -1.00516 | -1.60429 | -0.99244 | -1.58038 | -1.00628 | -1.60638 | -1.01771 |
| -1.02381 | -1.62061 | -0.98311 | -1.59622 | -0.99229 | -1.6221  | -0.99931 |
| -1.02578 | -1.63733 | -0.99103 | -1.6125  | -0.98545 | -1.63876 | -0.999   |
| -1.01292 | -1.65373 | -0.99379 | -1.62922 | -0.9913  | -1.65537 | -1.01277 |
| -1.01689 | -1.67058 | -0.99233 | -1.6456  | -0.99475 | -1.67168 | -1.02538 |
| -1.0131  | -1.68849 | -1.00986 | -1.66227 | -0.99984 | -1.68915 | -1.01773 |
| -0.9945  | -1.70661 | -1.00993 | -1.67905 | -0.99697 | -1.70785 | -1.00854 |
| -0.99106 | -1.72363 | -1.01562 | -1.69721 | -0.98646 | -1.7253  | -1.00096 |
| -1.00869 | -1.74032 | -1.00962 | -1.71524 | -0.98897 | -1.742   | -0.99775 |
| -1.01402 | -1.75686 | -0.99481 | -1.73195 | -1.0095  | -1.75855 | -1.02093 |
| -1.00743 | -1.77361 | -0.99133 | -1.74868 | -1.01335 | -1.77503 | -1.01462 |
| -1.02162 | -1.79185 | -0.99788 | -1.76524 | -0.99843 | -1.79238 | -1.00994 |
| -1.02606 | -1.81009 | -1.00499 | -1.78194 | -0.98675 | -1.81106 | -1.02015 |
| -1.01264 | -1.82759 | -1.00255 | -1.80073 | -0.99249 | -1.82905 | -1.01564 |
| -1.02737 | -1.84521 | -1.01914 | -1.8189  | -0.99705 | -1.84651 | -1.01815 |
| -1.02585 | -1.86262 | -1.01201 | -1.83648 | -0.99634 | -1.86379 | -1.01659 |
| -1.0016  | -1.8796  | -0.99828 | -1.85397 | -0.99588 | -1.88112 | -1.01148 |
| -1.00853 | -1.89654 | -1.00887 | -1.87095 | -0.99355 | -1.89834 | -1.00974 |
| -1.01747 | -1.9135  | -1.01493 | -1.88796 | -0.99339 | -1.91498 | -1.0069  |
| -1.01739 | -1.93054 | -1.02074 | -1.90481 | -0.99553 | -1.93231 | -1.00735 |

|          |          |          |          |          |          |          |
|----------|----------|----------|----------|----------|----------|----------|
| -1.01454 | -1.94824 | -1.0099  | -1.92223 | -0.9946  | -1.94964 | -1.00955 |
| -1.01254 | -1.96566 | -0.992   | -1.93972 | -0.98962 | -1.96713 | -1.00947 |
| -1.00558 | -1.98246 | -0.99737 | -1.9568  | -0.99173 | -1.98427 | -1.00509 |
| -0.9965  | -1.99375 | -1.00464 | -1.97434 | -0.9949  | -1.9962  | -0.99819 |
| -0.99777 | -1.99783 | -0.98907 | -1.98899 | -0.98936 | -2.00049 | -0.9885  |
| -1.00099 | -1.99899 | -0.97685 | -1.99687 | -0.98696 | -2.00182 | -0.99672 |
| -0.99746 | -1.99933 | -0.97718 | -1.99904 | -0.99149 | -2.0022  | -1.0058  |
| -0.99327 | -1.99942 | -0.97752 | -1.99967 | -0.98514 | -2.00227 | -0.98901 |
| -0.9916  | -1.99949 | -0.96968 | -1.99985 | -0.97724 | -2.00228 | -0.97671 |
| -0.99814 | -1.9995  | -0.98028 | -1.99996 | -0.97984 | -2.00231 | -0.98215 |
| -1.01486 | -1.99943 | -0.99933 | -1.99996 | -0.97957 | -2.00235 | -1.00574 |
| -1.01391 | -1.99947 | -1.00177 | -1.99995 | -0.98393 | -2.00236 | -0.99778 |
| -1.00469 | -1.99952 | -0.99246 | -1.99995 | -0.98665 | -1.99885 | -0.95719 |
| -1.00768 | -1.99604 | -0.9872  | -1.99991 | -0.97839 | -1.98834 | -0.96218 |
| -1.00857 | -1.9851  | -0.98775 | -1.99455 | -0.96785 | -1.97219 | -0.98567 |
| -0.99656 | -1.96908 | -0.97419 | -1.98177 | -0.96807 | -1.95544 | -0.98363 |
| -0.99018 | -1.9522  | -0.97679 | -1.96557 | -0.9719  | -1.93844 | -0.96167 |
| -0.99045 | -1.93517 | -0.96792 | -1.94867 | -0.9652  | -1.92149 | -0.96306 |
| -0.99197 | -1.91846 | -0.95578 | -1.93163 | -0.96092 | -1.90491 | -0.97802 |
| -1.00347 | -1.90175 | -0.97188 | -1.91451 | -0.96458 | -1.88831 | -0.98731 |
| -0.99901 | -1.88513 | -0.97098 | -1.89806 | -0.9562  | -1.8712  | -0.98746 |
| -1.00002 | -1.86791 | -0.9679  | -1.88133 | -0.94956 | -1.854   | -0.98703 |
| -1.00624 | -1.8506  | -0.97362 | -1.86404 | -0.96    | -1.8364  | -0.97979 |
| -0.99452 | -1.83344 | -0.96957 | -1.84673 | -0.96671 | -1.81915 | -0.95161 |
| -0.99387 | -1.81593 | -0.96561 | -1.82935 | -0.96332 | -1.80025 | -0.9531  |
| -0.99017 | -1.79726 | -0.97821 | -1.812   | -0.9582  | -1.78247 | -0.96262 |
| -0.97675 | -1.77921 | -0.98504 | -1.79336 | -0.95619 | -1.76581 | -0.9624  |
| -0.98811 | -1.76241 | -0.96636 | -1.77527 | -0.96568 | -1.74912 | -0.96231 |
| -0.98536 | -1.74607 | -0.94541 | -1.75866 | -0.97421 | -1.73222 | -0.97221 |
| -0.97598 | -1.72928 | -0.95729 | -1.74209 | -0.96861 | -1.7156  | -0.96309 |
| -0.98757 | -1.7127  | -0.97936 | -1.72568 | -0.96346 | -1.69715 | -0.94957 |
| -0.98716 | -1.69458 | -0.97917 | -1.7087  | -0.96169 | -1.67906 | -0.95663 |
| -0.99243 | -1.67611 | -0.97408 | -1.69027 | -0.95836 | -1.6623  | -0.95959 |
| -0.99371 | -1.65944 | -0.97643 | -1.67225 | -0.95016 | -1.64568 | -0.97526 |
| -0.98365 | -1.64268 | -0.98226 | -1.65572 | -0.95798 | -1.62931 | -0.97371 |
| -0.9798  | -1.62608 | -0.98265 | -1.63918 | -0.96979 | -1.61266 | -0.95752 |
| -1.00238 | -1.60967 | -0.97932 | -1.62257 | -0.9685  | -1.59669 | -0.96553 |
| -1.01126 | -1.59364 | -0.98004 | -1.60622 | -0.96822 | -1.58044 | -0.99684 |
| -0.99519 | -1.57702 | -0.98051 | -1.5903  | -0.96423 | -1.56282 | -0.99977 |
| -0.99548 | -1.55978 | -0.97632 | -1.57343 | -0.96942 | -1.54527 | -0.98335 |
| -1.00134 | -1.54238 | -0.97554 | -1.55594 | -0.97076 | -1.52764 | -0.97255 |
| -0.99933 | -1.52444 | -0.97893 | -1.53822 | -0.96476 | -1.51018 | -0.9675  |
| -0.99418 | -1.50688 | -0.96934 | -1.52024 | -0.96031 | -1.49298 | -0.976   |
| -0.98945 | -1.49025 | -0.96603 | -1.50285 | -0.96041 | -1.47598 | -0.97696 |
| -0.97539 | -1.47321 | -0.97941 | -1.48626 | -0.96668 | -1.45856 | -0.96367 |
| -0.97355 | -1.45586 | -0.99116 | -1.46913 | -0.95588 | -1.44128 | -0.95727 |
| -0.9764  | -1.43857 | -0.98622 | -1.45181 | -0.95877 | -1.42402 | -0.96718 |

|          |          |          |          |          |          |          |
|----------|----------|----------|----------|----------|----------|----------|
| -0.97787 | -1.42092 | -0.97465 | -1.43444 | -0.97686 | -1.40852 | -0.97648 |
| -0.97795 | -1.40537 | -0.98403 | -1.41717 | -0.96567 | -1.3929  | -0.98754 |
| -0.98363 | -1.38973 | -0.9898  | -1.40204 | -0.95891 | -1.37565 | -0.98467 |
| -0.98421 | -1.37252 | -0.97783 | -1.38638 | -0.96328 | -1.35774 | -0.97873 |
| -0.99706 | -1.35505 | -0.98143 | -1.36861 | -0.97003 | -1.33993 | -0.98779 |
| -0.99707 | -1.33716 | -0.98306 | -1.35052 | -0.97511 | -1.32198 | -0.98441 |
| -0.97654 | -1.31901 | -0.98062 | -1.33279 | -0.97209 | -1.3041  | -0.97779 |
| -0.98778 | -1.30111 | -0.97253 | -1.31537 | -0.95333 | -1.28681 | -0.97797 |
| -1.00095 | -1.28347 | -0.97067 | -1.2973  | -0.9558  | -1.26952 | -0.97922 |
| -1.00941 | -1.26628 | -0.97369 | -1.27942 | -0.96069 | -1.25204 | -0.97309 |
| -0.99257 | -1.24931 | -0.97133 | -1.26223 | -0.95494 | -1.23506 | -0.9749  |
| -0.98431 | -1.23203 | -0.96821 | -1.24545 | -0.96086 | -1.21754 | -0.97527 |
| -0.99338 | -1.2144  | -0.96495 | -1.22794 | -0.95838 | -1.20123 | -0.97673 |
| -0.9915  | -1.19824 | -0.97091 | -1.21097 | -0.96496 | -1.18466 | -0.98048 |
| -1.00503 | -1.18194 | -0.97446 | -1.19454 | -0.96432 | -1.16728 | -0.97755 |
| -1.00625 | -1.16453 | -0.97478 | -1.17775 | -0.95539 | -1.14973 | -0.99105 |
| -0.99194 | -1.14715 | -0.97121 | -1.16034 | -0.95581 | -1.13241 | -0.99045 |
| -0.98711 | -1.12975 | -0.97186 | -1.14296 | -0.9631  | -1.11494 | -0.9775  |
| -0.98165 | -1.11231 | -0.98661 | -1.12539 | -0.97025 | -1.09673 | -0.98716 |
| -0.99011 | -1.0941  | -0.98802 | -1.10766 | -0.96306 | -1.07947 | -0.98977 |
| -0.99535 | -1.07677 | -0.98338 | -1.08998 | -0.95249 | -1.06251 | -0.98408 |
| -0.99257 | -1.05993 | -0.9824  | -1.073   | -0.9605  | -1.0454  | -0.97771 |
| -0.98404 | -1.04308 | -0.97945 | -1.05588 | -0.97272 | -1.02865 | -0.97979 |
| -0.99175 | -1.02582 | -0.97671 | -1.039   | -0.96898 | -1.01203 | -0.9932  |
| -1.00687 | -1.00905 | -0.96902 | -1.02198 | -0.96085 | -0.99596 | -0.98597 |
| -0.99149 | -0.99325 | -0.97305 | -1.00605 | -0.97504 | -0.97905 | -0.97387 |
| -0.98117 | -0.97601 | -0.97015 | -0.9895  | -0.98251 | -0.96048 | -0.97984 |
| -0.97315 | -0.95769 | -0.9682  | -0.97163 | -0.97697 | -0.94242 | -0.97901 |
| -0.98374 | -0.93946 | -0.97179 | -0.95337 | -0.97002 | -0.92531 | -0.97637 |
| -0.99365 | -0.92237 | -0.96854 | -0.93573 | -0.96356 | -0.90902 | -0.97832 |
| -0.98713 | -0.906   | -0.97933 | -0.91856 | -0.96155 | -0.89228 | -0.97965 |
| -0.99152 | -0.88942 | -0.98261 | -0.90212 | -0.97104 | -0.87499 | -0.97351 |
| -0.99848 | -0.87241 | -0.97871 | -0.88535 | -0.96995 | -0.85774 | -0.97789 |
| -0.99459 | -0.85481 | -0.96738 | -0.8682  | -0.96138 | -0.8405  | -0.9841  |
| -0.9848  | -0.83753 | -0.96194 | -0.85102 | -0.9687  | -0.82301 | -0.96527 |
| -0.98793 | -0.82009 | -0.97435 | -0.8338  | -0.97524 | -0.8062  | -0.96252 |
| -0.98935 | -0.80334 | -0.9733  | -0.81629 | -0.96788 | -0.78942 | -0.98348 |
| -0.98648 | -0.78662 | -0.96453 | -0.79941 | -0.95482 | -0.77212 | -0.99119 |
| -0.98533 | -0.76919 | -0.9643  | -0.78235 | -0.96042 | -0.75504 | -0.99258 |
| -0.98356 | -0.7523  | -0.96214 | -0.76491 | -0.95907 | -0.73823 | -0.99212 |
| -0.98785 | -0.73544 | -0.95221 | -0.74807 | -0.95731 | -0.7209  | -0.98574 |
| -0.96969 | -0.71783 | -0.95838 | -0.73145 | -0.94841 | -0.7029  | -0.97579 |
| -0.9533  | -0.70012 | -0.95865 | -0.71386 | -0.93971 | -0.68534 | -0.97311 |
| -0.97148 | -0.68269 | -0.95148 | -0.69618 | -0.9515  | -0.66828 | -0.9786  |
| -0.98775 | -0.66568 | -0.9515  | -0.67879 | -0.95102 | -0.65079 | -0.97771 |
| -0.98704 | -0.64847 | -0.95688 | -0.66146 | -0.95343 | -0.63359 | -0.97565 |
| -0.9871  | -0.6313  | -0.97575 | -0.64403 | -0.95456 | -0.61745 | -0.97973 |

|          |          |          |          |          |          |          |
|----------|----------|----------|----------|----------|----------|----------|
| -0.98709 | -0.61469 | -0.98053 | -0.62711 | -0.9512  | -0.60175 | -0.97696 |
| -0.97218 | -0.59873 | -0.97166 | -0.61112 | -0.94575 | -0.58462 | -0.97349 |
| -0.9763  | -0.58186 | -0.96589 | -0.59505 | -0.93582 | -0.56696 | -0.99313 |
| -0.97458 | -0.56407 | -0.96792 | -0.57764 | -0.93626 | -0.54944 | -0.99169 |
| -0.9705  | -0.54676 | -0.95087 | -0.56    | -0.9378  | -0.53227 | -0.95624 |
| -0.96765 | -0.52964 | -0.94208 | -0.54255 | -0.93854 | -0.51436 | -0.95862 |
| -0.9535  | -0.51156 | -0.95466 | -0.52549 | -0.93991 | -0.49689 | -0.97277 |
| -0.95806 | -0.49407 | -0.94915 | -0.50773 | -0.93848 | -0.47987 | -0.97849 |
| -0.96418 | -0.47726 | -0.94498 | -0.49023 | -0.94368 | -0.46262 | -0.97727 |
| -0.95462 | -0.46003 | -0.951   | -0.47318 | -0.94414 | -0.44548 | -0.95781 |
| -0.95226 | -0.44309 | -0.93578 | -0.45598 | -0.94155 | -0.42868 | -0.95057 |
| -0.95678 | -0.42614 | -0.93433 | -0.43879 | -0.92933 | -0.41196 | -0.9455  |
| -0.95605 | -0.40934 | -0.94819 | -0.42247 | -0.92007 | -0.39525 | -0.9575  |
| -0.94822 | -0.39283 | -0.94451 | -0.40546 | -0.91707 | -0.37841 | -0.96642 |
| -0.93394 | -0.37569 | -0.92714 | -0.38845 | -0.91103 | -0.36101 | -0.95603 |
| -0.92338 | -0.35838 | -0.93095 | -0.37124 | -0.91019 | -0.34349 | -0.9414  |
| -0.91943 | -0.34141 | -0.93066 | -0.35404 | -0.91594 | -0.32652 | -0.93118 |
| -0.915   | -0.32421 | -0.91251 | -0.33683 | -0.91392 | -0.30956 | -0.92477 |
| -0.90593 | -0.30738 | -0.91534 | -0.3198  | -0.88602 | -0.2925  | -0.91694 |
| -0.89606 | -0.29036 | -0.90239 | -0.30287 | -0.88231 | -0.27511 | -0.91186 |
| -0.88197 | -0.27254 | -0.88803 | -0.28577 | -0.8954  | -0.25763 | -0.90084 |
| -0.87703 | -0.25501 | -0.88417 | -0.26821 | -0.89567 | -0.23985 | -0.88677 |
| -0.86292 | -0.23776 | -0.88119 | -0.2507  | -0.89939 | -0.22247 | -0.87552 |
| -0.8482  | -0.22008 | -0.86544 | -0.23296 | -0.87355 | -0.20551 | -0.8479  |
| -0.83794 | -0.20306 | -0.83058 | -0.21523 | -0.84563 | -0.18844 | -0.83886 |
| -0.83111 | -0.18595 | -0.82074 | -0.19864 | -0.83806 | -0.17081 | -0.83774 |
| -0.80475 | -0.16831 | -0.81969 | -0.18141 | -0.8198  | -0.153   | -0.81159 |
| -0.77949 | -0.15035 | -0.80936 | -0.16356 | -0.79228 | -0.13794 | -0.78471 |
| -0.77426 | -0.13576 | -0.79193 | -0.14888 | -0.77662 | -0.12264 | -0.75839 |
| -0.75494 | -0.12038 | -0.75298 | -0.13336 | -0.7528  | -0.10569 | -0.73564 |
| -0.71369 | -0.10314 | -0.73936 | -0.11545 | -0.71481 | -0.08857 | -0.7027  |
| -0.66976 | -0.08581 | -0.71965 | -0.09878 | -0.67509 | -0.07424 | -0.6463  |
| -0.61421 | -0.07135 | -0.67115 | -0.08158 | -0.64972 | -0.05758 | -0.60232 |
| -0.55762 | -0.05535 | -0.62216 | -0.06662 | -0.62491 | -0.03774 | -0.53914 |
| -0.49755 | -0.03536 | -0.55817 | -0.04996 | -0.56402 | -0.01944 | -0.45087 |
| -0.42614 | -0.01678 | -0.47741 | -0.03028 | -0.49693 | -0.00164 | -0.38236 |
| -0.32907 | 0.0027   | -0.39325 | -0.01274 | -0.42582 | 0.01861  | -0.28199 |
| -0.20894 | 0.02197  | -0.29675 | 0.00562  | -0.34622 | 0.03744  | -0.1619  |
| -0.0992  | 0.04096  | -0.17853 | 0.02599  | -0.25738 | 0.05399  | -0.04777 |
| -0.0116  | 0.05762  | -0.08537 | 0.04398  | -0.13616 | 0.07112  | 0.04929  |
| 0.08554  | 0.07473  | 0.01542  | 0.06087  | -0.02892 | 0.08842  | 0.15115  |
| 0.17461  | 0.09211  | 0.12272  | 0.07797  | 0.07539  | 0.10595  | 0.24881  |
| 0.24987  | 0.10961  | 0.21326  | 0.09539  | 0.19149  | 0.12346  | 0.30959  |
| 0.33332  | 0.12696  | 0.2943   | 0.11277  | 0.26895  | 0.14069  | 0.39358  |
| 0.41237  | 0.14412  | 0.37386  | 0.13027  | 0.32704  | 0.15748  | 0.50458  |
| 0.49332  | 0.1611   | 0.45385  | 0.14759  | 0.40997  | 0.1746   | 0.58278  |
| 0.56861  | 0.17794  | 0.5393   | 0.16448  | 0.5033   | 0.19179  | 0.641    |

|         |         |         |         |         |         |         |
|---------|---------|---------|---------|---------|---------|---------|
| 0.63342 | 0.19508 | 0.60381 | 0.18162 | 0.58295 | 0.20947 | 0.71078 |
| 0.69139 | 0.21293 | 0.65984 | 0.19859 | 0.6433  | 0.22741 | 0.76019 |
| 0.75622 | 0.23084 | 0.72347 | 0.21659 | 0.71252 | 0.24545 | 0.80903 |
| 0.80784 | 0.24891 | 0.79649 | 0.23439 | 0.77882 | 0.26227 | 0.86976 |
| 0.84814 | 0.26577 | 0.84825 | 0.25207 | 0.82149 | 0.27917 | 0.91299 |
| 0.87995 | 0.28243 | 0.86695 | 0.26894 | 0.85182 | 0.29642 | 0.92632 |
| 0.90556 | 0.29964 | 0.88513 | 0.286   | 0.88296 | 0.31405 | 0.93645 |
| 0.92516 | 0.31755 | 0.91135 | 0.30334 | 0.90674 | 0.3316  | 0.95137 |
| 0.93691 | 0.335   | 0.93572 | 0.32101 | 0.92892 | 0.34882 | 0.96691 |
| 0.95009 | 0.35251 | 0.9384  | 0.33859 | 0.93783 | 0.3659  | 0.95907 |
| 0.95097 | 0.36963 | 0.94747 | 0.35594 | 0.93469 | 0.38266 | 0.95236 |
| 0.94613 | 0.38653 | 0.97714 | 0.37291 | 0.9516  | 0.39974 | 0.95697 |
| 0.95196 | 0.40325 | 0.97818 | 0.38976 | 0.96518 | 0.41653 | 0.9643  |
| 0.95289 | 0.41961 | 0.9756  | 0.40609 | 0.96663 | 0.43299 | 0.97904 |
| 0.95228 | 0.43599 | 0.97244 | 0.42246 | 0.96893 | 0.44966 | 0.97996 |
| 0.97485 | 0.45302 | 0.97538 | 0.4394  | 0.97466 | 0.46792 | 0.99536 |
| 0.99342 | 0.47127 | 0.99951 | 0.45649 | 0.97486 | 0.48643 | 0.9938  |
| 0.99368 | 0.48969 | 1.00022 | 0.47486 | 0.97638 | 0.50399 | 0.98427 |
| 0.9818  | 0.50704 | 0.98594 | 0.49315 | 0.98605 | 0.5206  | 0.98337 |
| 0.99216 | 0.52351 | 0.98713 | 0.51017 | 0.99167 | 0.53773 | 0.98045 |
| 0.99532 | 0.54077 | 1.00417 | 0.52735 | 0.99714 | 0.55519 | 0.98723 |
| 0.98363 | 0.5582  | 1.01457 | 0.5447  | 1.00046 | 0.57212 | 0.99382 |
| 0.98928 | 0.57538 | 1.01003 | 0.56155 | 0.99552 | 0.58918 | 1.00548 |
| 0.98498 | 0.59254 | 1.00498 | 0.57883 | 0.99369 | 0.60631 | 1.01639 |
| 0.97982 | 0.60946 | 1.00977 | 0.59618 | 0.9988  | 0.6227  | 1.011   |
| 0.99008 | 0.62606 | 1.02006 | 0.61266 | 0.99774 | 0.63923 | 1.00711 |
| 0.99785 | 0.64243 | 1.02031 | 0.62934 | 1.00525 | 0.6564  | 1.007   |
| 0.99347 | 0.65984 | 1.01871 | 0.64597 | 1.02007 | 0.6745  | 0.99577 |
| 0.99471 | 0.67767 | 1.00837 | 0.66329 | 1.02153 | 0.69213 | 1.00596 |
| 1.00062 | 0.69535 | 1.00383 | 0.68122 | 1.01583 | 0.70909 | 1.01978 |
| 1.00481 | 0.71231 | 1.01482 | 0.69908 | 1.00949 | 0.72566 | 1.00327 |
| 1.01803 | 0.72896 | 1.00928 | 0.71581 | 1.0151  | 0.7424  | 0.99299 |
| 1.02767 | 0.74532 | 1.0154  | 0.7321  | 1.028   | 0.7596  | 0.99812 |
| 1.019   | 0.7627  | 1.0297  | 0.74861 | 1.03147 | 0.77709 | 1.00738 |
| 1.00438 | 0.78021 | 1.0109  | 0.76641 | 1.02519 | 0.79417 | 1.01027 |
| 1.00701 | 0.79697 | 1.00007 | 0.78387 | 1.02598 | 0.81145 | 1.01061 |
| 1.00977 | 0.81462 | 1.01297 | 0.8008  | 1.02689 | 0.82866 | 1.01076 |
| 0.99325 | 0.83203 | 1.011   | 0.81826 | 1.02086 | 0.84586 | 1.01667 |
| 0.99103 | 0.84908 | 1.01604 | 0.83547 | 1.01465 | 0.8631  | 1.01737 |
| 1.00644 | 0.8662  | 1.01747 | 0.85276 | 1.01078 | 0.88016 | 1.00795 |
| 1.00979 | 0.88314 | 1.01454 | 0.86981 | 1.0125  | 0.89701 | 1.01988 |
| 0.9998  | 0.89973 | 1.01928 | 0.88683 | 1.00814 | 0.91433 | 1.01724 |
| 1.0039  | 0.91741 | 1.01314 | 0.90354 | 1.01514 | 0.93176 | 1.00631 |
| 1.01866 | 0.93534 | 1.0197  | 0.92124 | 1.03147 | 0.94906 | 1.00954 |
| 1.00976 | 0.95227 | 1.01785 | 0.93881 | 1.01448 | 0.96584 | 1.0216  |
| 0.99955 | 0.96916 | 1.01537 | 0.95602 | 1.00292 | 0.9828  | 1.0244  |
| 1.00069 | 0.98614 | 1.02548 | 0.97293 | 1.01578 | 0.99997 | 1.01141 |

|         |         |         |         |         |         |         |
|---------|---------|---------|---------|---------|---------|---------|
| 1.0051  | 1.00287 | 1.04005 | 0.98965 | 1.02298 | 1.01705 | 1.00887 |
| 1.014   | 1.02023 | 1.03876 | 1.00692 | 1.02229 | 1.03437 | 1.01108 |
| 1.01901 | 1.03753 | 1.03177 | 1.02424 | 1.0196  | 1.05185 | 1.01192 |
| 1.01656 | 1.05485 | 1.03082 | 1.0412  | 1.02667 | 1.06915 | 1.01698 |
| 1.01496 | 1.07208 | 1.02827 | 1.05861 | 1.0292  | 1.08633 | 1.00701 |
| 1.01555 | 1.08897 | 1.04724 | 1.07593 | 1.02031 | 1.10325 | 1.00161 |
| 1.02207 | 1.10617 | 1.03862 | 1.09266 | 1.01338 | 1.12049 | 1.00539 |
| 1.02298 | 1.12363 | 1.02817 | 1.10977 | 1.00484 | 1.13822 | 1.01509 |
| 1.0325  | 1.14134 | 1.03888 | 1.12717 | 1.02014 | 1.15596 | 1.02452 |
| 1.04071 | 1.15895 | 1.03577 | 1.14502 | 1.02447 | 1.17338 | 1.0194  |
| 1.03076 | 1.17659 | 1.03822 | 1.16258 | 1.01461 | 1.191   | 1.02259 |
| 1.03506 | 1.19401 | 1.03792 | 1.18028 | 1.02211 | 1.20827 | 1.0257  |
| 1.0346  | 1.21101 | 1.02292 | 1.19782 | 1.01806 | 1.22461 | 1.02403 |
| 1.02089 | 1.22748 | 1.0315  | 1.21457 | 1.02519 | 1.24117 | 1.01203 |
| 1.01503 | 1.24444 | 1.02856 | 1.23101 | 1.0233  | 1.25867 | 0.99949 |
| 1.01819 | 1.26181 | 1.02079 | 1.24816 | 1.02048 | 1.27644 | 0.99944 |
| 1.03538 | 1.27936 | 1.03967 | 1.26546 | 1.02254 | 1.29385 | 1.0018  |
| 1.038   | 1.29697 | 1.03161 | 1.28316 | 1.01817 | 1.31021 | 0.99858 |
| 1.02617 | 1.31293 | 1.02198 | 1.30096 | 1.02312 | 1.32654 | 0.99662 |
| 1.02163 | 1.32925 | 1.02867 | 1.31661 | 1.03576 | 1.34285 | 0.99852 |
| 1.02125 | 1.34591 | 1.03083 | 1.33288 | 1.02577 | 1.35921 | 1.00023 |
| 1.01496 | 1.36241 | 1.03031 | 1.34938 | 1.021   | 1.37566 | 1.00325 |
| 1.00356 | 1.37874 | 1.02331 | 1.36579 | 1.03197 | 1.39176 | 0.98949 |
| 1.01131 | 1.3951  | 1.01869 | 1.38208 | 1.01298 | 1.4109  | 0.98664 |
| 1.02    | 1.41405 | 1.02676 | 1.39898 | 1.00905 | 1.43022 | 1.00081 |
| 1.02777 | 1.43315 | 1.03119 | 1.41851 | 1.03759 | 1.4476  | 1.00213 |
| 1.0296  | 1.45079 | 1.02797 | 1.43707 | 1.05246 | 1.46477 | 1.00613 |
| 1.01807 | 1.46803 | 1.03356 | 1.45425 | 1.03656 | 1.48205 | 1.00999 |
| 1.01369 | 1.48502 | 1.03468 | 1.47176 | 1.03355 | 1.49917 | 1.00829 |
| 1.02226 | 1.50232 | 1.01979 | 1.48879 | 1.04136 | 1.51674 | 1.00107 |
| 1.03631 | 1.51977 | 1.02058 | 1.50585 | 1.03506 | 1.53514 | 0.99761 |
| 1.04836 | 1.53798 | 1.03962 | 1.52357 | 1.03046 | 1.55356 | 1.00085 |
| 1.04438 | 1.55638 | 1.04881 | 1.5421  | 1.02989 | 1.57172 | 1.00645 |
| 1.03101 | 1.5748  | 1.04237 | 1.56053 | 1.03579 | 1.59032 | 1.00156 |
| 1.02684 | 1.59361 | 1.03914 | 1.57902 | 1.03105 | 1.60597 | 0.9997  |
| 1.03062 | 1.60917 | 1.04826 | 1.59748 | 1.02844 | 1.62041 | 1.00633 |
| 1.02532 | 1.62319 | 1.03897 | 1.61142 | 1.01814 | 1.63672 | 1.01557 |
| 1.01639 | 1.63998 | 1.03441 | 1.62576 | 1.01211 | 1.65462 | 1.00837 |
| 1.02153 | 1.65775 | 1.02965 | 1.64368 | 1.02217 | 1.6726  | 1.00458 |
| 1.03471 | 1.67574 | 1.02387 | 1.66155 | 1.02234 | 1.69053 | 1.00494 |
| 1.04021 | 1.6935  | 1.03499 | 1.67933 | 1.03259 | 1.7081  | 1.00167 |
| 1.0344  | 1.71099 | 1.03153 | 1.69722 | 1.03867 | 1.7235  | 0.99807 |
| 1.02534 | 1.72615 | 1.02537 | 1.71378 | 1.04079 | 1.7388  | 0.99138 |
| 1.01696 | 1.7417  | 1.01849 | 1.72903 | 1.04295 | 1.75504 | 1.0008  |
| 1.01176 | 1.75856 | 1.0044  | 1.74509 | 1.02958 | 1.77176 | 0.99487 |
| 1.01304 | 1.77512 | 1.00626 | 1.76166 | 1.02118 | 1.78832 | 0.98809 |
| 1.01043 | 1.79188 | 1.01116 | 1.77834 | 1.02    | 1.80688 | 0.99411 |



|         |         |         |         |         |         |         |
|---------|---------|---------|---------|---------|---------|---------|
| 1.01424 | 1.81013 | 1.03212 | 1.79507 | 1.02222 | 1.82558 | 0.99935 |
| 1.02437 | 1.82861 | 1.03681 | 1.814   | 1.02668 | 1.84349 | 1.00896 |
| 1.01508 | 1.84662 | 1.03198 | 1.83289 | 1.03361 | 1.86097 | 1.00641 |
| 1.01037 | 1.86415 | 1.03628 | 1.85064 | 1.04003 | 1.8787  | 0.99918 |
| 1.01827 | 1.8818  | 1.02248 | 1.86807 | 1.03701 | 1.89645 | 0.99361 |
| 1.01939 | 1.89929 | 1.02289 | 1.88572 | 1.02528 | 1.91219 | 0.99691 |
| 1.01235 | 1.91514 | 1.03797 | 1.90259 | 1.01587 | 1.9283  | 1.00618 |
| 1.01171 | 1.93161 | 1.031   | 1.91864 | 1.03182 | 1.94611 | 1.01356 |
| 1.02577 | 1.94933 | 1.02338 | 1.93535 | 1.02143 | 1.96367 | 0.99753 |
| 1.02549 | 1.96704 | 1.02773 | 1.95308 | 1.00091 | 1.98141 | 0.9784  |
| 1.0097  | 1.98474 | 1.03713 | 1.97071 | 1.02082 | 1.99746 | 0.99907 |
| 1.00254 | 2.00045 | 1.02903 | 1.98846 | 1.03177 | 2.00652 | 0.99672 |
| 1.00369 | 2.00883 | 1.01246 | 2.00306 | 1.01921 | 2.00885 | 0.97616 |
| 1.0047  | 2.01098 | 1.01976 | 2.00973 | 1.01381 | 2.00957 | 0.9725  |
| 0.99903 | 2.01167 | 1.00407 | 2.01146 | 1.01708 | 2.00984 | 0.97249 |
| 0.99495 | 2.01189 | 0.99414 | 2.01201 | 1.00414 | 2.0099  | 0.97787 |
| 0.99711 | 2.01192 | 1.00517 | 2.01215 | 0.99228 | 2.00991 | 0.96486 |
| 0.99993 | 2.01192 | 1.01759 | 2.01218 | 0.99956 | 2.00996 | 0.96433 |
| 1.00425 | 2.01196 | 1.01089 | 2.01225 | 1.00067 | 2.00994 | 0.97053 |

| moH     | T60K-PA | moH     | T80K-PA | moH     | T100K-PA | moH     |
|---------|---------|---------|---------|---------|----------|---------|
| 2.00938 | 1.02271 | 2.01244 | 1.00524 | 2.01108 | 1.01097  | 2.01103 |
| 2.00935 | 1.0072  | 2.01242 | 1.01629 | 2.0111  | 1.00906  | 2.01102 |
| 2.00937 | 1.01318 | 2.01242 | 1.01362 | 2.01109 | 1.02109  | 2.01102 |
| 2.00933 | 1.01842 | 2.01218 | 1.01657 | 2.00964 | 1.0243   | 2.01087 |
| 2.00514 | 1.00125 | 2.00581 | 1.01401 | 2.00159 | 1.0097   | 2.00554 |
| 1.99258 | 0.97908 | 1.99246 | 0.99193 | 1.98605 | 0.9959   | 1.99217 |
| 1.97608 | 0.99924 | 1.97567 | 0.99159 | 1.96918 | 0.98147  | 1.9758  |
| 1.95905 | 1.00278 | 1.95857 | 0.99232 | 1.9523  | 0.98731  | 1.95842 |
| 1.94169 | 0.99005 | 1.94123 | 0.98457 | 1.93481 | 0.99182  | 1.94111 |
| 1.92425 | 0.98745 | 1.92393 | 0.98716 | 1.91774 | 0.98198  | 1.92355 |
| 1.90887 | 0.9859  | 1.90835 | 0.99731 | 1.90224 | 0.99899  | 1.90815 |
| 1.89311 | 0.98745 | 1.8924  | 1.00802 | 1.88615 | 1.00377  | 1.8922  |
| 1.87558 | 0.99629 | 1.87483 | 0.9931  | 1.86852 | 0.99429  | 1.87459 |
| 1.85795 | 1.00901 | 1.85742 | 0.9883  | 1.85114 | 0.98936  | 1.85718 |
| 1.84045 | 0.99806 | 1.83985 | 0.98593 | 1.83354 | 0.98839  | 1.84    |
| 1.82255 | 0.9909  | 1.82154 | 0.97686 | 1.8145  | 0.99076  | 1.82185 |
| 1.80345 | 1.00533 | 1.80265 | 0.99508 | 1.79589 | 0.98175  | 1.80255 |
| 1.78555 | 1.00897 | 1.78523 | 1.01263 | 1.77903 | 0.98606  | 1.78481 |
| 1.76917 | 0.99329 | 1.76837 | 1.00902 | 1.76235 | 0.9941   | 1.76854 |
| 1.75244 | 0.99695 | 1.75186 | 0.98779 | 1.74583 | 1.00104  | 1.75184 |
| 1.73595 | 0.99731 | 1.73535 | 0.97909 | 1.72932 | 0.99624  | 1.73528 |
| 1.72098 | 0.99561 | 1.72098 | 0.99854 | 1.71433 | 0.99736  | 1.72057 |
| 1.7052  | 0.99452 | 1.70466 | 0.98684 | 1.69808 | 1.00722  | 1.70484 |
| 1.68745 | 0.99716 | 1.68674 | 0.97026 | 1.68033 | 0.99771  | 1.68679 |
| 1.66965 | 1.01181 | 1.66854 | 0.97232 | 1.66229 | 0.98128  | 1.66886 |
| 1.65162 | 1.00629 | 1.65046 | 0.97474 | 1.6445  | 0.97881  | 1.65083 |
| 1.63342 | 0.97848 | 1.63273 | 0.98115 | 1.62676 | 0.98224  | 1.63298 |
| 1.61756 | 0.98605 | 1.61875 | 1.00519 | 1.61298 | 0.97723  | 1.6177  |
| 1.60354 | 0.99005 | 1.6042  | 1.0186  | 1.59789 | 0.98372  | 1.60345 |
| 1.58719 | 1.00056 | 1.5863  | 1.00965 | 1.57964 | 1.00055  | 1.58661 |
| 1.56855 | 1.01227 | 1.56792 | 1.00936 | 1.56098 | 0.99786  | 1.56821 |
| 1.54992 | 1.00253 | 1.54927 | 1.00452 | 1.54263 | 1.00506  | 1.54938 |
| 1.53178 | 1.00777 | 1.53054 | 0.99182 | 1.52443 | 1.02104  | 1.53057 |
| 1.51359 | 0.99722 | 1.51287 | 0.99087 | 1.50645 | 1.00954  | 1.51257 |
| 1.49639 | 0.99903 | 1.49562 | 0.9863  | 1.48924 | 1.001    | 1.49544 |
| 1.47912 | 1.00619 | 1.47845 | 0.97803 | 1.47232 | 1.00681  | 1.47817 |
| 1.4616  | 1.00298 | 1.46107 | 0.99145 | 1.45487 | 0.99623  | 1.46107 |
| 1.44428 | 1.00993 | 1.44389 | 0.9807  | 1.43769 | 0.99248  | 1.44387 |
| 1.42693 | 1.01866 | 1.42619 | 0.98166 | 1.41924 | 1.00941  | 1.4259  |
| 1.40711 | 0.99561 | 1.40644 | 1.00006 | 1.40003 | 1.0085   | 1.40629 |
| 1.38876 | 0.99183 | 1.38831 | 0.99317 | 1.38241 | 0.99914  | 1.38839 |
| 1.3724  | 0.99924 | 1.37208 | 0.98534 | 1.36606 | 0.99752  | 1.3719  |
| 1.35603 | 0.98714 | 1.35566 | 0.99228 | 1.34992 | 1.00869  | 1.35562 |
| 1.33995 | 0.98517 | 1.33938 | 0.99108 | 1.33353 | 1.00985  | 1.33932 |
| 1.32336 | 0.99798 | 1.32323 | 0.99878 | 1.31761 | 1.01037  | 1.32329 |
| 1.30772 | 1.01317 | 1.30715 | 1.02319 | 1.30132 | 1.01227  | 1.30717 |

|         |         |         |         |         |         |         |
|---------|---------|---------|---------|---------|---------|---------|
| 1.29091 | 1.01187 | 1.29052 | 1.01942 | 1.28389 | 1.00176 | 1.29025 |
| 1.27338 | 1.00005 | 1.27292 | 1.01248 | 1.26653 | 1.00183 | 1.27262 |
| 1.25584 | 0.99156 | 1.25516 | 0.98616 | 1.24896 | 0.99241 | 1.25511 |
| 1.23864 | 0.99348 | 1.23786 | 0.98776 | 1.23125 | 0.98562 | 1.23778 |
| 1.22196 | 1.0068  | 1.22149 | 0.99953 | 1.21503 | 0.99483 | 1.22157 |
| 1.2054  | 1.00528 | 1.20498 | 0.99927 | 1.19876 | 0.99496 | 1.20477 |
| 1.18832 | 1.0112  | 1.18725 | 0.99107 | 1.18112 | 0.99253 | 1.18707 |
| 1.17052 | 1.01106 | 1.16935 | 0.98965 | 1.1629  | 0.99095 | 1.16956 |
| 1.15238 | 0.98582 | 1.15154 | 1.00079 | 1.14487 | 0.98479 | 1.15204 |
| 1.13477 | 0.99907 | 1.13415 | 0.99237 | 1.12746 | 0.98491 | 1.13409 |
| 1.11754 | 1.0083  | 1.11642 | 1.00888 | 1.10997 | 0.99697 | 1.11637 |
| 1.09982 | 0.98205 | 1.09922 | 1.01062 | 1.0929  | 1.00781 | 1.09933 |
| 1.08253 | 0.98449 | 1.08202 | 0.99394 | 1.07579 | 1.00198 | 1.08212 |
| 1.06572 | 1.00172 | 1.0649  | 1.00387 | 1.05853 | 1.00967 | 1.06496 |
| 1.04837 | 1.00226 | 1.04752 | 0.99824 | 1.0413  | 1.01597 | 1.04762 |
| 1.0312  | 1.00352 | 1.03014 | 0.99358 | 1.02416 | 1.01301 | 1.03054 |
| 1.01372 | 1.00528 | 1.01302 | 0.99296 | 1.00688 | 1.00319 | 1.01307 |
| 0.99653 | 1.00243 | 0.99575 | 0.9965  | 0.98946 | 0.99381 | 0.99572 |
| 0.97949 | 0.99574 | 0.9789  | 0.99613 | 0.97262 | 1.01009 | 0.9787  |
| 0.96275 | 0.99891 | 0.96219 | 0.98744 | 0.95572 | 1.01902 | 0.96199 |
| 0.94568 | 1.01061 | 0.94518 | 1.00125 | 0.9387  | 1.0109  | 0.94492 |
| 0.92849 | 1.01683 | 0.92774 | 1.00635 | 0.9213  | 0.99295 | 0.92781 |
| 0.91069 | 1.00122 | 0.9102  | 0.99968 | 0.90376 | 0.97829 | 0.90998 |
| 0.89342 | 0.99189 | 0.89279 | 1.00883 | 0.88692 | 0.98463 | 0.89254 |
| 0.8767  | 0.99154 | 0.87577 | 1.02239 | 0.86991 | 0.98943 | 0.8761  |
| 0.8596  | 0.98671 | 0.85902 | 1.00955 | 0.85252 | 0.99091 | 0.85922 |
| 0.8424  | 0.99633 | 0.84191 | 0.99879 | 0.83568 | 0.99454 | 0.84211 |
| 0.82548 | 0.99906 | 0.82458 | 0.99522 | 0.81804 | 0.98017 | 0.82493 |
| 0.80782 | 1.00385 | 0.80686 | 0.97262 | 0.80057 | 0.98423 | 0.80748 |
| 0.7906  | 0.99752 | 0.7896  | 0.98011 | 0.78395 | 1.00123 | 0.79    |
| 0.77325 | 0.96805 | 0.77247 | 1.00053 | 0.7659  | 0.98884 | 0.77221 |
| 0.75581 | 0.97232 | 0.75485 | 1.00136 | 0.74843 | 0.99047 | 0.75499 |
| 0.73873 | 0.98291 | 0.73786 | 1.00078 | 0.73217 | 0.99772 | 0.73813 |
| 0.72227 | 0.98655 | 0.72164 | 1.00518 | 0.71557 | 0.99317 | 0.72178 |
| 0.70546 | 0.99299 | 0.70465 | 0.99968 | 0.69866 | 0.98895 | 0.70493 |
| 0.6881  | 1.00398 | 0.68767 | 0.99542 | 0.68118 | 0.98439 | 0.68765 |
| 0.67021 | 1.00707 | 0.66958 | 0.99398 | 0.6631  | 0.98172 | 0.6695  |
| 0.65262 | 0.99894 | 0.65179 | 0.98798 | 0.64549 | 0.98377 | 0.65179 |
| 0.63586 | 0.97564 | 0.6348  | 0.98264 | 0.62877 | 0.9885  | 0.63516 |
| 0.61925 | 0.97379 | 0.61867 | 0.99299 | 0.61282 | 0.98591 | 0.61875 |
| 0.60286 | 0.98294 | 0.60234 | 1.01084 | 0.59612 | 0.98255 | 0.60224 |
| 0.5854  | 0.98314 | 0.58458 | 1.00495 | 0.5782  | 0.98118 | 0.58462 |
| 0.56836 | 0.9985  | 0.56764 | 0.98983 | 0.56127 | 0.98832 | 0.56781 |
| 0.55116 | 0.98622 | 0.55032 | 0.98365 | 0.54415 | 0.98285 | 0.55054 |
| 0.53369 | 0.96777 | 0.53253 | 0.97777 | 0.52664 | 0.98451 | 0.53304 |
| 0.51669 | 0.96071 | 0.516   | 0.97928 | 0.50983 | 0.97827 | 0.51622 |
| 0.49979 | 0.95661 | 0.49932 | 0.97575 | 0.49286 | 0.96818 | 0.49939 |

|          |          |          |          |          |          |          |
|----------|----------|----------|----------|----------|----------|----------|
| 0.48258  | 0.96734  | 0.48148  | 0.96335  | 0.47463  | 0.9708   | 0.4816   |
| 0.46329  | 0.96158  | 0.46266  | 0.96957  | 0.45616  | 0.95369  | 0.46286  |
| 0.44535  | 0.96548  | 0.44507  | 0.97963  | 0.43865  | 0.96151  | 0.44503  |
| 0.42891  | 0.97127  | 0.42819  | 0.96512  | 0.42184  | 0.96327  | 0.42797  |
| 0.41226  | 0.96041  | 0.41103  | 0.95234  | 0.40491  | 0.94365  | 0.41132  |
| 0.39511  | 0.9548   | 0.39455  | 0.95213  | 0.38826  | 0.94978  | 0.39447  |
| 0.37836  | 0.94916  | 0.37765  | 0.95085  | 0.37162  | 0.94791  | 0.37767  |
| 0.3615   | 0.9501   | 0.36062  | 0.94914  | 0.35475  | 0.93538  | 0.36101  |
| 0.34471  | 0.95154  | 0.3439   | 0.94597  | 0.33743  | 0.93943  | 0.34354  |
| 0.32736  | 0.954    | 0.32628  | 0.93917  | 0.3196   | 0.92103  | 0.3263   |
| 0.30971  | 0.93388  | 0.30869  | 0.93613  | 0.30218  | 0.89798  | 0.30848  |
| 0.29213  | 0.9023   | 0.29153  | 0.9179   | 0.28468  | 0.90467  | 0.29074  |
| 0.2749   | 0.89974  | 0.27394  | 0.9049   | 0.2677   | 0.90715  | 0.27387  |
| 0.25803  | 0.90588  | 0.25708  | 0.89883  | 0.25063  | 0.89204  | 0.25695  |
| 0.24097  | 0.8925   | 0.23976  | 0.86985  | 0.23325  | 0.88066  | 0.23983  |
| 0.22283  | 0.86965  | 0.22163  | 0.86408  | 0.21546  | 0.85718  | 0.22176  |
| 0.2049   | 0.85905  | 0.20413  | 0.86476  | 0.19774  | 0.84396  | 0.20395  |
| 0.18773  | 0.84292  | 0.18661  | 0.84792  | 0.1803   | 0.85032  | 0.18644  |
| 0.17033  | 0.82134  | 0.16926  | 0.85117  | 0.16316  | 0.82627  | 0.16915  |
| 0.15302  | 0.80989  | 0.15247  | 0.83497  | 0.14599  | 0.78673  | 0.15245  |
| 0.13575  | 0.78709  | 0.13478  | 0.79546  | 0.12849  | 0.74973  | 0.13483  |
| 0.11828  | 0.76551  | 0.11707  | 0.76456  | 0.11049  | 0.72733  | 0.11706  |
| 0.10029  | 0.73083  | 0.09925  | 0.72696  | 0.0939   | 0.69644  | 0.09924  |
| 0.08223  | 0.67093  | 0.08127  | 0.67965  | 0.07569  | 0.64542  | 0.08146  |
| 0.06464  | 0.61174  | 0.0638   | 0.60416  | 0.05721  | 0.58286  | 0.0636   |
| 0.04725  | 0.55095  | 0.04661  | 0.54122  | 0.04028  | 0.51792  | 0.04651  |
| 0.03061  | 0.49514  | 0.03011  | 0.48029  | 0.02404  | 0.4481   | 0.03014  |
| 0.01077  | 0.40213  | 0.01025  | 0.39876  | 0.00383  | 0.36894  | 0.00954  |
| -0.0092  | 0.30003  | -0.00953 | 0.30647  | -0.01664 | 0.27153  | -0.01134 |
| -0.02703 | 0.21056  | -0.0279  | 0.19719  | -0.03516 | 0.1591   | -0.02985 |
| -0.04651 | 0.09222  | -0.04712 | 0.07777  | -0.05465 | 0.04367  | -0.04941 |
| -0.06631 | -0.04032 | -0.06588 | -0.03198 | -0.07036 | -0.07907 | -0.06761 |
| -0.08096 | -0.12451 | -0.08036 | -0.11897 | -0.08535 | -0.19131 | -0.08246 |
| -0.09497 | -0.1848  | -0.09496 | -0.21168 | -0.10176 | -0.28824 | -0.09719 |
| -0.11159 | -0.28643 | -0.11166 | -0.303   | -0.1182  | -0.37382 | -0.11378 |
| -0.12843 | -0.39018 | -0.12861 | -0.38717 | -0.13555 | -0.45285 | -0.13085 |
| -0.14613 | -0.46448 | -0.14598 | -0.47702 | -0.15274 | -0.53415 | -0.14855 |
| -0.16065 | -0.53322 | -0.16055 | -0.54923 | -0.16738 | -0.60931 | -0.16319 |
| -0.17604 | -0.60795 | -0.17627 | -0.63084 | -0.18324 | -0.66758 | -0.17838 |
| -0.19334 | -0.70172 | -0.19327 | -0.70761 | -0.20036 | -0.72934 | -0.19599 |
| -0.21046 | -0.76633 | -0.21045 | -0.76726 | -0.21741 | -0.78173 | -0.21293 |
| -0.22793 | -0.80565 | -0.2279  | -0.81343 | -0.23507 | -0.83843 | -0.23031 |
| -0.24513 | -0.85771 | -0.24557 | -0.85302 | -0.2526  | -0.89063 | -0.24787 |
| -0.26248 | -0.89905 | -0.26318 | -0.87138 | -0.27016 | -0.92982 | -0.26542 |
| -0.28031 | -0.93517 | -0.28047 | -0.88875 | -0.28762 | -0.95412 | -0.28278 |
| -0.29782 | -0.94731 | -0.29744 | -0.9224  | -0.30456 | -0.93446 | -0.30013 |
| -0.31449 | -0.95803 | -0.31459 | -0.93871 | -0.32137 | -0.94235 | -0.31694 |

|          |          |          |          |          |          |          |
|----------|----------|----------|----------|----------|----------|----------|
| -0.33154 | -0.97889 | -0.33187 | -0.94187 | -0.33855 | -0.95188 | -0.33407 |
| -0.34842 | -0.99195 | -0.34897 | -0.95396 | -0.3557  | -0.95745 | -0.35117 |
| -0.36582 | -0.99189 | -0.36617 | -0.95675 | -0.37307 | -0.98329 | -0.36803 |
| -0.38311 | -0.99159 | -0.38331 | -0.96374 | -0.39011 | -1.00571 | -0.38548 |
| -0.39997 | -1.00403 | -0.40023 | -0.97906 | -0.40759 | -1.01958 | -0.40266 |
| -0.41764 | -1.01803 | -0.41774 | -0.98094 | -0.42484 | -1.0043  | -0.42014 |
| -0.43475 | -1.0195  | -0.43478 | -0.97904 | -0.44173 | -0.99832 | -0.43729 |
| -0.45186 | -1.00823 | -0.45192 | -0.97029 | -0.45888 | -1.00694 | -0.45401 |
| -0.46811 | -1.00496 | -0.46841 | -0.9814  | -0.47529 | -1.01146 | -0.47059 |
| -0.48472 | -1.00009 | -0.4848  | -0.99309 | -0.49184 | -1.02448 | -0.48762 |
| -0.50175 | -1.0033  | -0.50186 | -1.00012 | -0.50975 | -1.03667 | -0.50483 |
| -0.51944 | -1.01103 | -0.51971 | -0.99859 | -0.52723 | -1.0262  | -0.52245 |
| -0.53681 | -1.02376 | -0.53711 | -0.99213 | -0.54431 | -1.01163 | -0.53974 |
| -0.55406 | -1.03882 | -0.55398 | -0.99589 | -0.56148 | -1.00554 | -0.55697 |
| -0.57147 | -1.03652 | -0.57171 | -1.00318 | -0.57917 | -1.01263 | -0.57443 |
| -0.58893 | -1.02992 | -0.58941 | -1.0049  | -0.59669 | -1.02823 | -0.59226 |
| -0.6056  | -1.02831 | -0.60535 | -1.00311 | -0.61261 | -1.02805 | -0.60816 |
| -0.62156 | -1.04413 | -0.62171 | -1.0113  | -0.62857 | -1.02877 | -0.62421 |
| -0.63829 | -1.04174 | -0.63867 | -1.01223 | -0.64567 | -1.02126 | -0.64105 |
| -0.6556  | -1.03145 | -0.65586 | -1.00127 | -0.66317 | -1.01952 | -0.65866 |
| -0.6731  | -1.0283  | -0.67322 | -0.99805 | -0.68038 | -1.03128 | -0.67584 |
| -0.68997 | -1.02877 | -0.69017 | -1.01301 | -0.69724 | -1.01799 | -0.69258 |
| -0.70738 | -1.03869 | -0.70808 | -1.00972 | -0.71515 | -1.01832 | -0.7105  |
| -0.72536 | -1.0396  | -0.72586 | -1.00549 | -0.73272 | -1.02577 | -0.72844 |
| -0.74245 | -1.03639 | -0.74267 | -1.00403 | -0.74946 | -1.0362  | -0.74533 |
| -0.75933 | -1.04064 | -0.75931 | -1.00308 | -0.76629 | -1.04359 | -0.76182 |
| -0.77663 | -1.04809 | -0.77666 | -1.01008 | -0.78365 | -1.04038 | -0.77891 |
| -0.79368 | -1.04861 | -0.79389 | -1.01405 | -0.80052 | -1.03572 | -0.79613 |
| -0.81054 | -1.04084 | -0.81078 | -1.01248 | -0.8175  | -1.03672 | -0.81297 |
| -0.82738 | -1.02819 | -0.82795 | -1.01354 | -0.83481 | -1.03704 | -0.83051 |
| -0.84493 | -1.0319  | -0.84523 | -1.00688 | -0.85217 | -1.02227 | -0.84787 |
| -0.86198 | -1.04307 | -0.86213 | -1.00581 | -0.86943 | -1.02461 | -0.86468 |
| -0.87927 | -1.03759 | -0.87952 | -1.01381 | -0.88679 | -1.03094 | -0.88187 |
| -0.89653 | -1.03366 | -0.89646 | -1.02138 | -0.90333 | -1.04431 | -0.89912 |
| -0.91317 | -1.03858 | -0.91301 | -1.01451 | -0.91999 | -1.04364 | -0.91557 |
| -0.92958 | -1.03147 | -0.92965 | -0.99656 | -0.93681 | -1.02334 | -0.93208 |
| -0.94707 | -1.03023 | -0.94748 | -0.99877 | -0.95497 | -1.02397 | -0.94988 |
| -0.96518 | -1.04079 | -0.96576 | -1.00847 | -0.97312 | -1.03946 | -0.96808 |
| -0.98342 | -1.04737 | -0.98373 | -1.01606 | -0.9908  | -1.03187 | -0.9859  |
| -1.00019 | -1.04752 | -0.99979 | -1.0098  | -1.00695 | -1.01612 | -1.00226 |
| -1.01591 | -1.05634 | -1.01605 | -1.00157 | -1.02318 | -1.02934 | -1.01834 |
| -1.03264 | -1.0703  | -1.03306 | -1.00227 | -1.04008 | -1.03589 | -1.03553 |
| -1.04956 | -1.05432 | -1.05001 | -1.00952 | -1.05695 | -1.0375  | -1.05247 |
| -1.06661 | -1.04578 | -1.06695 | -1.01007 | -1.07389 | -1.0392  | -1.06916 |
| -1.08348 | -1.05055 | -1.08394 | -1.01022 | -1.09102 | -1.03914 | -1.08615 |
| -1.1013  | -1.04102 | -1.10175 | -1.01218 | -1.10866 | -1.04102 | -1.10399 |
| -1.11911 | -1.03268 | -1.11945 | -1.01778 | -1.12658 | -1.03572 | -1.12201 |

|          |          |          |          |          |          |          |
|----------|----------|----------|----------|----------|----------|----------|
| -1.13619 | -1.02119 | -1.13659 | -1.02345 | -1.14419 | -1.03854 | -1.13928 |
| -1.15386 | -1.02184 | -1.1542  | -1.02339 | -1.16134 | -1.03184 | -1.15657 |
| -1.17117 | -1.03941 | -1.17165 | -1.01958 | -1.17872 | -1.03104 | -1.17419 |
| -1.18876 | -1.04412 | -1.18871 | -1.02129 | -1.19547 | -1.04255 | -1.19137 |
| -1.20502 | -1.03341 | -1.20506 | -1.02427 | -1.21175 | -1.04015 | -1.2074  |
| -1.22115 | -1.03114 | -1.22138 | -1.01515 | -1.22879 | -1.04588 | -1.22391 |
| -1.23823 | -1.02932 | -1.23868 | -0.99738 | -1.24602 | -1.0376  | -1.24135 |
| -1.25542 | -1.02907 | -1.25602 | -1.00481 | -1.26304 | -1.02009 | -1.25848 |
| -1.27271 | -1.02961 | -1.27292 | -1.01647 | -1.28016 | -1.01185 | -1.27561 |
| -1.28976 | -1.02061 | -1.29045 | -1.02001 | -1.29788 | -1.02206 | -1.29303 |
| -1.30784 | -1.02522 | -1.30825 | -1.01401 | -1.31572 | -1.04305 | -1.31098 |
| -1.32582 | -1.02383 | -1.32587 | -1.01887 | -1.33363 | -1.03564 | -1.32885 |
| -1.34345 | -1.03805 | -1.34402 | -1.02311 | -1.35128 | -1.03122 | -1.34644 |
| -1.36121 | -1.06276 | -1.36193 | -1.0193  | -1.36923 | -1.03727 | -1.36417 |
| -1.37891 | -1.05577 | -1.37943 | -1.00766 | -1.38721 | -1.03444 | -1.38242 |
| -1.39626 | -1.04378 | -1.39608 | -0.98987 | -1.40245 | -1.03511 | -1.39881 |
| -1.41197 | -1.03716 | -1.41177 | -1.0083  | -1.41803 | -1.03385 | -1.41415 |
| -1.4278  | -1.0418  | -1.42787 | -1.02582 | -1.43537 | -1.02091 | -1.43067 |
| -1.44517 | -1.0398  | -1.44496 | -1.01445 | -1.45263 | -1.02359 | -1.448   |
| -1.46246 | -1.04005 | -1.46262 | -1.01181 | -1.46993 | -1.03484 | -1.46519 |
| -1.4794  | -1.03572 | -1.4799  | -1.01576 | -1.48697 | -1.03906 | -1.48239 |
| -1.49646 | -1.03098 | -1.4969  | -1.00329 | -1.50414 | -1.04001 | -1.49941 |
| -1.51363 | -1.04285 | -1.51428 | -1.00802 | -1.52164 | -1.03054 | -1.51677 |
| -1.53118 | -1.04575 | -1.53164 | -1.01023 | -1.53891 | -1.02473 | -1.53424 |
| -1.54909 | -1.05111 | -1.54936 | -1.01427 | -1.55661 | -1.03147 | -1.55184 |
| -1.56661 | -1.04568 | -1.56711 | -1.02024 | -1.57409 | -1.02997 | -1.56949 |
| -1.58388 | -1.02948 | -1.58435 | -1.01571 | -1.59113 | -1.02649 | -1.58719 |
| -1.59983 | -1.03893 | -1.5999  | -1.01043 | -1.60721 | -1.02221 | -1.60297 |
| -1.61608 | -1.04511 | -1.61605 | -1.00367 | -1.62315 | -1.02775 | -1.61871 |
| -1.63273 | -1.02806 | -1.63295 | -1.02216 | -1.63993 | -1.03335 | -1.63537 |
| -1.64908 | -1.03064 | -1.64946 | -1.01925 | -1.65651 | -1.03442 | -1.65217 |
| -1.66595 | -1.03832 | -1.66589 | -0.98941 | -1.67315 | -1.03619 | -1.66879 |
| -1.68262 | -1.0254  | -1.68289 | -0.99696 | -1.69072 | -1.03154 | -1.68538 |
| -1.70114 | -1.03291 | -1.70157 | -1.00383 | -1.70905 | -1.03785 | -1.70386 |
| -1.71917 | -1.03303 | -1.71942 | -1.00159 | -1.7263  | -1.02666 | -1.72207 |
| -1.73552 | -1.03078 | -1.73582 | -1.00987 | -1.74313 | -1.02283 | -1.73862 |
| -1.75216 | -1.04646 | -1.75269 | -1.01146 | -1.75986 | -1.02517 | -1.75534 |
| -1.76893 | -1.05004 | -1.76955 | -1.01616 | -1.77622 | -1.01934 | -1.77208 |
| -1.78574 | -1.03312 | -1.78609 | -1.01044 | -1.79412 | -1.0343  | -1.78932 |
| -1.80455 | -1.03025 | -1.80485 | -1.01163 | -1.81247 | -1.03867 | -1.80756 |
| -1.82292 | -1.0297  | -1.82322 | -1.02191 | -1.83041 | -1.03022 | -1.82583 |
| -1.84004 | -1.02085 | -1.8406  | -1.01989 | -1.84781 | -1.03683 | -1.84322 |
| -1.85756 | -1.02749 | -1.85796 | -1.00874 | -1.86513 | -1.02625 | -1.86033 |
| -1.87483 | -1.02355 | -1.87501 | -0.99987 | -1.88229 | -1.00989 | -1.87766 |
| -1.89188 | -1.02078 | -1.89214 | -1.01091 | -1.899   | -1.00303 | -1.89487 |
| -1.90891 | -1.02011 | -1.90902 | -1.00911 | -1.91625 | -0.99497 | -1.9116  |
| -1.9259  | -1.02216 | -1.92619 | -1.01134 | -1.93363 | -1.01741 | -1.92881 |

|          |          |          |          |          |          |          |
|----------|----------|----------|----------|----------|----------|----------|
| -1.94301 | -1.02343 | -1.94364 | -1.01748 | -1.95078 | -1.04336 | -1.94621 |
| -1.96062 | -1.01556 | -1.9608  | -0.99678 | -1.96825 | -1.03333 | -1.96379 |
| -1.97813 | -1.02254 | -1.97864 | -1.00357 | -1.9851  | -1.01822 | -1.98129 |
| -1.99303 | -1.02271 | -1.99191 | -1.00524 | -1.99608 | -1.0236  | -1.99418 |
| -1.99989 | -1.03484 | -1.9978  | -0.99028 | -2.00007 | -1.00906 | -1.99964 |
| -2.00198 | -1.0383  | -1.99932 | -0.97537 | -2.00115 | -1.00769 | -2.00106 |
| -2.00263 | -1.01192 | -1.99991 | -0.97903 | -2.0015  | -1.02863 | -2.00148 |
| -2.00282 | -1.0094  | -2.00002 | -0.99172 | -2.00164 | -1.01697 | -2.00158 |
| -2.00289 | -1.01864 | -2.00006 | -0.98436 | -2.00167 | -1.01056 | -2.00163 |
| -2.00288 | -1.01308 | -2.00013 | -0.98399 | -2.00164 | -1.03074 | -2.00165 |
| -2.00288 | -1.00551 | -2.00009 | -0.98795 | -2.00165 | -1.01838 | -2.00167 |
| -2.00291 | -1.02329 | -2.00005 | -0.99989 | -2.00167 | -0.99747 | -2.0016  |
| -2.00291 | -1.01443 | -2.00006 | -0.99439 | -1.99801 | -0.99379 | -2.0008  |
| -2.00026 | -0.99091 | -1.99721 | -0.96114 | -1.98682 | -0.9749  | -1.99265 |
| -1.9907  | -0.99468 | -1.98549 | -0.95463 | -1.97075 | -0.98054 | -1.97815 |
| -1.97513 | -1.00486 | -1.96925 | -0.96729 | -1.95391 | -0.98882 | -1.9614  |
| -1.95825 | -1.01362 | -1.95268 | -0.97316 | -1.93708 | -0.98364 | -1.94461 |
| -1.94131 | -1.0177  | -1.93598 | -0.97567 | -1.91995 | -0.9822  | -1.92755 |
| -1.92417 | -1.01329 | -1.91862 | -0.96642 | -1.90342 | -0.98997 | -1.91065 |
| -1.90759 | -0.98555 | -1.90179 | -0.97266 | -1.88668 | -0.99501 | -1.89409 |
| -1.89083 | -0.99443 | -1.88519 | -0.98191 | -1.86964 | -0.99031 | -1.87735 |
| -1.8738  | -1.00682 | -1.86849 | -0.97583 | -1.85244 | -0.9998  | -1.86007 |
| -1.85671 | -0.99027 | -1.85111 | -0.96584 | -1.83503 | -0.98722 | -1.84276 |
| -1.83927 | -0.98654 | -1.83372 | -0.96522 | -1.81763 | -0.98045 | -1.82526 |
| -1.82208 | -0.98031 | -1.81651 | -0.96177 | -1.79903 | -0.9926  | -1.80724 |
| -1.803   | -0.97379 | -1.79793 | -0.95517 | -1.78078 | -0.99168 | -1.78922 |
| -1.78499 | -0.98101 | -1.77953 | -0.96524 | -1.76422 | -0.98862 | -1.77184 |
| -1.7685  | -0.98997 | -1.7627  | -0.96004 | -1.74743 | -0.97977 | -1.75484 |
| -1.75193 | -0.9895  | -1.74642 | -0.97578 | -1.73056 | -0.98373 | -1.73818 |
| -1.73515 | -0.98641 | -1.72963 | -0.98669 | -1.71397 | -0.98772 | -1.72151 |
| -1.71855 | -1.00011 | -1.71304 | -0.97985 | -1.69574 | -0.98855 | -1.70369 |
| -1.6998  | -1.00051 | -1.69433 | -0.98361 | -1.67759 | -0.9937  | -1.68543 |
| -1.6818  | -0.99736 | -1.67629 | -0.95724 | -1.66107 | -0.99382 | -1.66836 |
| -1.66513 | -1.00631 | -1.65988 | -0.9504  | -1.64428 | -0.9942  | -1.65157 |
| -1.64844 | -1.00272 | -1.64295 | -0.97105 | -1.62766 | -0.9922  | -1.63505 |
| -1.63202 | -0.99945 | -1.62633 | -0.97089 | -1.61098 | -0.98534 | -1.61862 |
| -1.61517 | -0.99943 | -1.60983 | -0.95968 | -1.5953  | -0.99597 | -1.60306 |
| -1.59958 | -0.99428 | -1.59403 | -0.96773 | -1.57883 | -0.99629 | -1.58649 |
| -1.58315 | -0.99454 | -1.57727 | -0.9758  | -1.56133 | -0.99934 | -1.56908 |
| -1.56569 | -1.0096  | -1.55969 | -0.97454 | -1.54362 | -0.99034 | -1.55145 |
| -1.54799 | -1.01067 | -1.54235 | -0.97341 | -1.52606 | -0.97674 | -1.53393 |
| -1.53047 | -1.00585 | -1.52462 | -0.9645  | -1.50846 | -0.98659 | -1.51631 |
| -1.51285 | -1.00072 | -1.50702 | -0.9659  | -1.49152 | -0.99039 | -1.49897 |
| -1.49573 | -0.99754 | -1.49031 | -0.968   | -1.47441 | -0.99396 | -1.4819  |
| -1.47868 | -1.0001  | -1.47305 | -0.96549 | -1.45714 | -0.98976 | -1.4647  |
| -1.4615  | -1.00244 | -1.45554 | -0.95842 | -1.43982 | -0.99938 | -1.44755 |
| -1.44412 | -0.99886 | -1.43823 | -0.95417 | -1.42255 | -1.01433 | -1.4304  |

|          |          |          |          |          |          |          |
|----------|----------|----------|----------|----------|----------|----------|
| -1.4267  | -1.00155 | -1.42104 | -0.97716 | -1.40718 | -1.01267 | -1.41312 |
| -1.41111 | -1.01822 | -1.40587 | -0.99046 | -1.39164 | -1.00521 | -1.39815 |
| -1.39565 | -1.01573 | -1.39032 | -0.9806  | -1.37401 | -0.99921 | -1.38196 |
| -1.37864 | -1.00194 | -1.37265 | -0.97545 | -1.35626 | -1.00552 | -1.36426 |
| -1.36096 | -1.0073  | -1.35494 | -0.966   | -1.33841 | -1.00369 | -1.34627 |
| -1.34283 | -1.01749 | -1.33744 | -0.97661 | -1.32077 | -0.99534 | -1.32853 |
| -1.32517 | -1.0209  | -1.31965 | -0.99128 | -1.30266 | -0.99472 | -1.3106  |
| -1.30723 | -1.01608 | -1.30166 | -0.98039 | -1.28511 | -0.99334 | -1.2928  |
| -1.2896  | -1.00378 | -1.2838  | -0.98009 | -1.26781 | -0.99361 | -1.27578 |
| -1.27223 | -1.00009 | -1.26643 | -0.98408 | -1.25042 | -0.99667 | -1.25844 |
| -1.25505 | -1.01632 | -1.24948 | -0.97798 | -1.23334 | -1.00034 | -1.24115 |
| -1.2381  | -1.02796 | -1.232   | -0.97217 | -1.21625 | -0.99519 | -1.22382 |
| -1.22051 | -1.02581 | -1.21455 | -0.97295 | -1.19969 | -1.00165 | -1.20705 |
| -1.20388 | -1.03177 | -1.1986  | -0.98577 | -1.18315 | -1.00372 | -1.19063 |
| -1.18749 | -1.0128  | -1.18183 | -0.9885  | -1.16577 | -0.99705 | -1.17328 |
| -1.17042 | -0.99743 | -1.16445 | -0.98158 | -1.14839 | -0.99028 | -1.15591 |
| -1.15278 | -0.99876 | -1.14735 | -0.98035 | -1.13078 | -0.99115 | -1.13844 |
| -1.13517 | -0.99463 | -1.12992 | -0.98376 | -1.11335 | -0.99565 | -1.12118 |
| -1.11785 | -0.99377 | -1.11198 | -0.98028 | -1.09547 | -0.99082 | -1.10319 |
| -1.10008 | -0.99425 | -1.09395 | -0.97526 | -1.07806 | -1.00371 | -1.08567 |
| -1.08246 | -1.00107 | -1.07679 | -0.97045 | -1.06101 | -1.01349 | -1.06853 |
| -1.0655  | -1.00418 | -1.06013 | -0.96986 | -1.04412 | -0.99975 | -1.05162 |
| -1.04846 | -1.01291 | -1.04294 | -0.98815 | -1.02712 | -1.00097 | -1.03465 |
| -1.03158 | -1.01265 | -1.02605 | -0.98632 | -1.01072 | -1.00804 | -1.0177  |
| -1.01491 | -1.00526 | -1.00946 | -0.97648 | -0.99449 | -0.99919 | -1.00189 |
| -0.99884 | -1.00523 | -0.99307 | -0.98376 | -0.97743 | -1.00903 | -0.9853  |
| -0.9817  | -1.01472 | -0.97616 | -0.98701 | -0.95898 | -1.0029  | -0.96735 |
| -0.96379 | -1.02646 | -0.95769 | -0.98408 | -0.94075 | -0.9992  | -0.94909 |
| -0.94565 | -1.01104 | -0.93976 | -0.96346 | -0.92403 | -1.00485 | -0.93135 |
| -0.92835 | -0.99657 | -0.92297 | -0.96224 | -0.90759 | -0.98509 | -0.91456 |
| -0.91171 | -0.98826 | -0.90649 | -0.97259 | -0.89052 | -0.97983 | -0.89841 |
| -0.89521 | -0.9882  | -0.88981 | -0.98104 | -0.87342 | -0.99264 | -0.88128 |
| -0.87797 | -1.00332 | -0.87221 | -0.9874  | -0.85627 | -0.9899  | -0.86404 |
| -0.86074 | -1.00612 | -0.85479 | -0.98476 | -0.83871 | -1.00108 | -0.84688 |
| -0.84368 | -1.00555 | -0.83786 | -0.98177 | -0.82125 | -1.00233 | -0.82912 |
| -0.82625 | -1.00641 | -0.82018 | -0.97769 | -0.80472 | -0.99132 | -0.81206 |
| -0.8091  | -1.01007 | -0.80323 | -0.98305 | -0.78773 | -1.00309 | -0.79509 |
| -0.79219 | -1.00654 | -0.78658 | -0.98296 | -0.77038 | -1.00278 | -0.77809 |
| -0.77466 | -0.99857 | -0.76904 | -0.97002 | -0.75342 | -1.00618 | -0.76094 |
| -0.75753 | -1.00652 | -0.75224 | -0.9565  | -0.73658 | -1.01391 | -0.74408 |
| -0.74096 | -1.01084 | -0.73566 | -0.96168 | -0.71924 | -1.01585 | -0.727   |
| -0.72398 | -1.00531 | -0.71845 | -0.96995 | -0.70154 | -1.00584 | -0.70914 |
| -0.70621 | -1.01823 | -0.70062 | -0.97861 | -0.6841  | -0.99134 | -0.69143 |
| -0.68846 | -1.01448 | -0.68302 | -0.98778 | -0.66708 | -0.98478 | -0.67465 |
| -0.67155 | -0.98979 | -0.66596 | -0.98085 | -0.6495  | -0.99653 | -0.65724 |
| -0.65419 | -0.99754 | -0.64852 | -0.97532 | -0.63236 | -0.99875 | -0.63988 |
| -0.63659 | -0.9962  | -0.63133 | -0.96765 | -0.61597 | -0.98963 | -0.62291 |



|          |          |          |          |          |          |          |
|----------|----------|----------|----------|----------|----------|----------|
| -0.61996 | -0.99343 | -0.61469 | -0.9674  | -0.59998 | -0.99156 | -0.60717 |
| -0.60413 | -0.99581 | -0.59889 | -0.97261 | -0.5828  | -0.97487 | -0.59065 |
| -0.58744 | -0.99897 | -0.58169 | -0.97009 | -0.56521 | -0.9768  | -0.573   |
| -0.56991 | -1.00788 | -0.56375 | -0.96742 | -0.5478  | -0.97528 | -0.55548 |
| -0.55227 | -1.00199 | -0.54669 | -0.97132 | -0.53072 | -0.96867 | -0.53816 |
| -0.53519 | -0.98515 | -0.52941 | -0.96803 | -0.51302 | -0.98471 | -0.52104 |
| -0.51764 | -0.98134 | -0.51152 | -0.9536  | -0.49559 | -0.97571 | -0.50337 |
| -0.49983 | -0.99641 | -0.49436 | -0.95826 | -0.47841 | -0.97884 | -0.48616 |
| -0.48268 | -0.98296 | -0.47722 | -0.95116 | -0.46112 | -0.97296 | -0.46899 |
| -0.46551 | -0.95769 | -0.46007 | -0.94366 | -0.444   | -0.95655 | -0.45181 |
| -0.44856 | -0.96822 | -0.44296 | -0.95009 | -0.42717 | -0.9639  | -0.43477 |
| -0.43148 | -0.98868 | -0.42603 | -0.94811 | -0.41026 | -0.97168 | -0.41822 |
| -0.41494 | -0.97953 | -0.4092  | -0.95038 | -0.39358 | -0.96593 | -0.40119 |
| -0.39845 | -0.98739 | -0.3925  | -0.94477 | -0.37636 | -0.94874 | -0.38405 |
| -0.38126 | -0.9884  | -0.37525 | -0.92254 | -0.3592  | -0.94856 | -0.36696 |
| -0.36371 | -0.97841 | -0.35771 | -0.91265 | -0.34186 | -0.94144 | -0.34943 |
| -0.34666 | -0.98481 | -0.34071 | -0.92005 | -0.32484 | -0.93805 | -0.33229 |
| -0.32937 | -0.97299 | -0.32393 | -0.93351 | -0.30803 | -0.9374  | -0.31529 |
| -0.31242 | -0.95712 | -0.30695 | -0.93051 | -0.29096 | -0.92625 | -0.29841 |
| -0.29569 | -0.95288 | -0.28948 | -0.90504 | -0.2738  | -0.9257  | -0.28101 |
| -0.27821 | -0.93893 | -0.27226 | -0.8907  | -0.25607 | -0.91215 | -0.26366 |
| -0.26075 | -0.92184 | -0.25511 | -0.88591 | -0.23813 | -0.88996 | -0.24597 |
| -0.24315 | -0.91772 | -0.2373  | -0.86883 | -0.22076 | -0.86365 | -0.22841 |
| -0.22562 | -0.90808 | -0.21958 | -0.84478 | -0.20369 | -0.84308 | -0.21111 |
| -0.20839 | -0.88267 | -0.20239 | -0.8408  | -0.1866  | -0.84141 | -0.19403 |
| -0.19115 | -0.85211 | -0.18531 | -0.83246 | -0.16888 | -0.81249 | -0.17688 |
| -0.1736  | -0.8405  | -0.16813 | -0.82235 | -0.15154 | -0.79343 | -0.15904 |
| -0.1558  | -0.80806 | -0.15059 | -0.79842 | -0.13636 | -0.79761 | -0.14403 |
| -0.14096 | -0.77864 | -0.1356  | -0.7775  | -0.12057 | -0.77562 | -0.12825 |
| -0.12556 | -0.78633 | -0.11982 | -0.75964 | -0.10363 | -0.73183 | -0.11078 |
| -0.10829 | -0.76969 | -0.10254 | -0.71971 | -0.08678 | -0.69088 | -0.09391 |
| -0.09138 | -0.72051 | -0.08544 | -0.68001 | -0.07235 | -0.65512 | -0.07684 |
| -0.07729 | -0.67821 | -0.07128 | -0.64454 | -0.05557 | -0.60573 | -0.06181 |
| -0.06087 | -0.62646 | -0.05468 | -0.5756  | -0.03578 | -0.52518 | -0.04446 |
| -0.04098 | -0.54983 | -0.0349  | -0.51108 | -0.01762 | -0.43308 | -0.02534 |
| -0.02219 | -0.47087 | -0.01676 | -0.45557 | 7.33E-04 | -0.35113 | -0.00759 |
| -0.00494 | -0.39474 | 0.0011   | -0.35477 | 0.02087  | -0.24457 | 0.01154  |
| 0.01558  | -0.28212 | 0.02149  | -0.2211  | 0.03984  | -0.12234 | 0.03128  |
| 0.03494  | -0.156   | 0.04039  | -0.10903 | 0.05648  | -0.02109 | 0.04913  |
| 0.05139  | -0.04963 | 0.05708  | -0.01962 | 0.07362  | 0.07515  | 0.06599  |
| 0.06847  | 0.04564  | 0.07396  | 0.0796   | 0.09088  | 0.1769   | 0.08334  |
| 0.08584  | 0.1513   | 0.09131  | 0.18738  | 0.1084   | 0.2694   | 0.10073  |
| 0.10334  | 0.26604  | 0.10884  | 0.27059  | 0.12589  | 0.35475  | 0.11824  |
| 0.12074  | 0.3475   | 0.12631  | 0.34676  | 0.14305  | 0.4472   | 0.13565  |
| 0.1382   | 0.4262   | 0.14371  | 0.43502  | 0.16017  | 0.53436  | 0.1526   |
| 0.15474  | 0.52052  | 0.16047  | 0.51919  | 0.17728  | 0.61889  | 0.1693   |
| 0.17175  | 0.60006  | 0.17767  | 0.60935  | 0.19416  | 0.69681  | 0.18656  |

|         |         |         |         |         |         |         |
|---------|---------|---------|---------|---------|---------|---------|
| 0.18903 | 0.68007 | 0.19485 | 0.68057 | 0.21196 | 0.75826 | 0.20389 |
| 0.20659 | 0.75529 | 0.21259 | 0.7308  | 0.23012 | 0.80666 | 0.22188 |
| 0.22461 | 0.80778 | 0.23033 | 0.80679 | 0.24795 | 0.85854 | 0.24007 |
| 0.2423  | 0.84633 | 0.2483  | 0.86075 | 0.26448 | 0.88877 | 0.25708 |
| 0.25906 | 0.8749  | 0.26516 | 0.87756 | 0.28158 | 0.91028 | 0.27408 |
| 0.27606 | 0.89574 | 0.28213 | 0.90074 | 0.29868 | 0.93512 | 0.29136 |
| 0.29334 | 0.92906 | 0.29967 | 0.93202 | 0.31635 | 0.93756 | 0.30859 |
| 0.31118 | 0.95601 | 0.31704 | 0.95643 | 0.33404 | 0.94781 | 0.32629 |
| 0.32906 | 0.96646 | 0.33482 | 0.97007 | 0.35136 | 0.96664 | 0.34358 |
| 0.34629 | 0.97729 | 0.35197 | 0.98159 | 0.36844 | 0.96009 | 0.36092 |
| 0.36317 | 0.97177 | 0.36878 | 0.98042 | 0.38532 | 0.9714  | 0.37798 |
| 0.38028 | 0.97244 | 0.38566 | 0.97842 | 0.40172 | 0.99888 | 0.39476 |
| 0.39722 | 0.99072 | 0.40283 | 0.9879  | 0.41849 | 0.99331 | 0.41132 |
| 0.41341 | 1.00039 | 0.41937 | 0.99563 | 0.43531 | 0.98955 | 0.4282  |
| 0.43008 | 0.99704 | 0.43573 | 0.99163 | 0.45233 | 1.00397 | 0.44484 |
| 0.44667 | 1.01865 | 0.45282 | 0.98586 | 0.47069 | 1.00076 | 0.46292 |
| 0.4649  | 1.02329 | 0.47104 | 1.00275 | 0.48921 | 1.0045  | 0.48138 |
| 0.48335 | 1.02791 | 0.48954 | 1.01974 | 0.50646 | 1.00864 | 0.49914 |
| 0.50089 | 1.03414 | 0.50694 | 1.0208  | 0.52328 | 1.00292 | 0.51578 |
| 0.51779 | 1.01767 | 0.5234  | 1.01463 | 0.54041 | 1.00928 | 0.53281 |
| 0.53493 | 1.01771 | 0.54055 | 1.00923 | 0.55751 | 1.02369 | 0.55064 |
| 0.55235 | 1.0286  | 0.55801 | 1.02095 | 0.57449 | 1.02606 | 0.56759 |
| 0.56939 | 1.0431  | 0.57491 | 1.02925 | 0.5917  | 1.0106  | 0.58471 |
| 0.58658 | 1.05197 | 0.59244 | 1.01761 | 0.60886 | 1.01024 | 0.60217 |
| 0.60367 | 1.04984 | 0.60952 | 1.01173 | 0.62523 | 1.01906 | 0.61823 |
| 0.62006 | 1.0358  | 0.62557 | 1.01019 | 0.64183 | 1.02589 | 0.63454 |
| 0.63667 | 1.02552 | 0.64224 | 0.99931 | 0.65913 | 1.0233  | 0.65139 |
| 0.65358 | 1.03575 | 0.65936 | 1.00258 | 0.6772  | 1.02395 | 0.66927 |
| 0.67155 | 1.04355 | 0.67751 | 1.02188 | 0.69476 | 1.02341 | 0.68708 |
| 0.68939 | 1.04235 | 0.69523 | 1.04095 | 0.71172 | 1.02386 | 0.70442 |
| 0.70649 | 1.04029 | 0.71219 | 1.03337 | 0.7282  | 1.04824 | 0.72116 |
| 0.72296 | 1.03896 | 0.72878 | 1.02615 | 0.74494 | 1.05258 | 0.73771 |
| 0.73952 | 1.04163 | 0.74541 | 1.02558 | 0.76241 | 1.03066 | 0.75442 |
| 0.75643 | 1.04674 | 0.76257 | 1.01743 | 0.77955 | 1.03558 | 0.77203 |
| 0.77413 | 1.05595 | 0.77978 | 1.01991 | 0.79648 | 1.03403 | 0.7893  |
| 0.79151 | 1.05668 | 0.7969  | 1.03577 | 0.81426 | 1.02752 | 0.8064  |
| 0.8087  | 1.04096 | 0.81481 | 1.04329 | 0.83153 | 1.02052 | 0.82389 |
| 0.82596 | 1.03728 | 0.83208 | 1.0374  | 0.84832 | 1.0266  | 0.84128 |
| 0.84315 | 1.05487 | 0.84866 | 1.02337 | 0.86577 | 1.03833 | 0.85816 |
| 0.86024 | 1.05726 | 0.86587 | 1.02487 | 0.88272 | 1.03431 | 0.87533 |
| 0.87739 | 1.03651 | 0.88326 | 1.03359 | 0.89948 | 1.0318  | 0.89215 |
| 0.89429 | 1.02775 | 0.89988 | 1.03105 | 0.91686 | 1.03094 | 0.90938 |
| 0.91144 | 1.04423 | 0.9175  | 1.0458  | 0.93451 | 1.02875 | 0.92688 |
| 0.92909 | 1.04018 | 0.93508 | 1.04487 | 0.95165 | 1.0259  | 0.94436 |
| 0.94631 | 1.03701 | 0.95201 | 1.0245  | 0.96857 | 1.02103 | 0.96125 |
| 0.96324 | 1.04956 | 0.96875 | 1.01906 | 0.98527 | 1.02232 | 0.97817 |
| 0.98011 | 1.05513 | 0.98592 | 1.01916 | 1.00244 | 1.01834 | 0.99506 |

|         |         |         |         |         |         |         |
|---------|---------|---------|---------|---------|---------|---------|
| 0.99717 | 1.05997 | 1.00307 | 1.03294 | 1.01976 | 1.01509 | 1.01245 |
| 1.01459 | 1.04412 | 1.02047 | 1.03127 | 1.03721 | 1.02474 | 1.02972 |
| 1.03196 | 1.04658 | 1.03765 | 1.02511 | 1.0547  | 1.02561 | 1.04702 |
| 1.04882 | 1.06206 | 1.05454 | 1.04054 | 1.07191 | 1.02882 | 1.06445 |
| 1.06612 | 1.0588  | 1.07198 | 1.04779 | 1.08886 | 1.0309  | 1.08151 |
| 1.08322 | 1.0503  | 1.08915 | 1.03028 | 1.10575 | 1.02755 | 1.09843 |
| 1.10035 | 1.04478 | 1.10605 | 1.02993 | 1.12327 | 1.01911 | 1.11595 |
| 1.11765 | 1.04929 | 1.12351 | 1.04847 | 1.14069 | 1.03044 | 1.1335  |
| 1.1353  | 1.05402 | 1.14105 | 1.04494 | 1.15816 | 1.04407 | 1.15126 |
| 1.15303 | 1.05682 | 1.15883 | 1.03417 | 1.17571 | 1.04139 | 1.1688  |
| 1.17067 | 1.05988 | 1.17633 | 1.04475 | 1.19341 | 1.041   | 1.18655 |
| 1.18826 | 1.07038 | 1.19394 | 1.05158 | 1.21064 | 1.03505 | 1.20428 |
| 1.20585 | 1.07711 | 1.21111 | 1.0407  | 1.22712 | 1.02092 | 1.22056 |
| 1.22213 | 1.05541 | 1.22738 | 1.03449 | 1.24381 | 1.02559 | 1.23683 |
| 1.23826 | 1.0497  | 1.24415 | 1.03013 | 1.26133 | 1.03325 | 1.2543  |
| 1.25592 | 1.05659 | 1.26174 | 1.03913 | 1.27881 | 1.02416 | 1.27176 |
| 1.27359 | 1.05601 | 1.27921 | 1.04671 | 1.29613 | 1.03241 | 1.28935 |
| 1.29078 | 1.04665 | 1.2966  | 1.03912 | 1.31247 | 1.03212 | 1.30649 |
| 1.30741 | 1.04469 | 1.31304 | 1.03335 | 1.32903 | 1.01907 | 1.32248 |
| 1.32363 | 1.06797 | 1.32924 | 1.03209 | 1.34562 | 1.01491 | 1.33847 |
| 1.34016 | 1.07309 | 1.34596 | 1.0214  | 1.36177 | 1.0314  | 1.35512 |
| 1.35664 | 1.06484 | 1.36222 | 1.02969 | 1.37792 | 1.03463 | 1.37158 |
| 1.37304 | 1.04826 | 1.37869 | 1.03516 | 1.39422 | 1.01951 | 1.38758 |
| 1.38926 | 1.04272 | 1.39511 | 1.01202 | 1.41402 | 1.0216  | 1.40637 |
| 1.40797 | 1.05501 | 1.4141  | 1.02346 | 1.43299 | 1.01393 | 1.42535 |
| 1.42734 | 1.05408 | 1.43301 | 1.03507 | 1.45005 | 1.02312 | 1.44335 |
| 1.44475 | 1.04605 | 1.45059 | 1.02617 | 1.46737 | 1.02889 | 1.46041 |
| 1.46208 | 1.05976 | 1.46785 | 1.03689 | 1.48458 | 1.01204 | 1.47777 |
| 1.4792  | 1.04308 | 1.48527 | 1.03669 | 1.50155 | 1.02336 | 1.49526 |
| 1.49652 | 1.03783 | 1.50242 | 1.02688 | 1.51938 | 1.03308 | 1.51233 |
| 1.51413 | 1.06864 | 1.51955 | 1.03663 | 1.53764 | 1.02336 | 1.53006 |
| 1.53181 | 1.0699  | 1.5377  | 1.03573 | 1.5562  | 1.01994 | 1.54878 |
| 1.54995 | 1.06732 | 1.55615 | 1.04555 | 1.57465 | 1.03011 | 1.5671  |
| 1.56875 | 1.07455 | 1.57447 | 1.05213 | 1.59294 | 1.03289 | 1.58561 |
| 1.58732 | 1.07107 | 1.59335 | 1.03768 | 1.60789 | 1.02142 | 1.60383 |
| 1.60358 | 1.04988 | 1.60917 | 1.0419  | 1.62253 | 1.00997 | 1.61755 |
| 1.61783 | 1.03098 | 1.62334 | 1.0414  | 1.63973 | 1.02403 | 1.63213 |
| 1.6337  | 1.03642 | 1.64017 | 1.02659 | 1.65749 | 1.0331  | 1.65013 |
| 1.65171 | 1.05443 | 1.65791 | 1.01843 | 1.67521 | 1.01543 | 1.66788 |
| 1.66964 | 1.06235 | 1.67559 | 1.02775 | 1.69296 | 1.00931 | 1.68584 |
| 1.68764 | 1.05399 | 1.6933  | 1.0349  | 1.71005 | 1.02949 | 1.70365 |
| 1.7053  | 1.05472 | 1.71106 | 1.04398 | 1.72529 | 1.03335 | 1.71912 |
| 1.72052 | 1.0588  | 1.72623 | 1.03912 | 1.74099 | 1.01746 | 1.73456 |
| 1.73575 | 1.0529  | 1.7415  | 1.04107 | 1.7579  | 1.01335 | 1.75112 |
| 1.75245 | 1.03779 | 1.75841 | 1.03778 | 1.77444 | 1.01519 | 1.76759 |
| 1.76903 | 1.03603 | 1.77508 | 1.02672 | 1.79086 | 1.01019 | 1.7844  |
| 1.78579 | 1.03105 | 1.79147 | 1.02003 | 1.80966 | 1.00501 | 1.80229 |

|         |         |         |         |         |         |         |
|---------|---------|---------|---------|---------|---------|---------|
| 1.80378 | 1.03687 | 1.81028 | 1.03688 | 1.82865 | 1.02215 | 1.82113 |
| 1.82269 | 1.04767 | 1.82925 | 1.04901 | 1.84645 | 1.02511 | 1.83902 |
| 1.84076 | 1.04484 | 1.84654 | 1.02846 | 1.86382 | 1.01825 | 1.85668 |
| 1.85824 | 1.07237 | 1.86418 | 1.03298 | 1.88119 | 1.00643 | 1.8742  |
| 1.87572 | 1.06602 | 1.88201 | 1.03251 | 1.89878 | 0.99895 | 1.89181 |
| 1.89346 | 1.05186 | 1.89956 | 1.02662 | 1.91421 | 0.99768 | 1.9073  |
| 1.90919 | 1.05758 | 1.91519 | 1.02571 | 1.93067 | 0.98572 | 1.92369 |
| 1.92547 | 1.043   | 1.93125 | 1.04277 | 1.94844 | 0.98771 | 1.9414  |
| 1.94319 | 1.04351 | 1.94905 | 1.04105 | 1.96635 | 1.00086 | 1.95924 |
| 1.96091 | 1.04241 | 1.96693 | 1.02265 | 1.98396 | 1.0037  | 1.97683 |
| 1.97844 | 1.03787 | 1.98437 | 1.03486 | 1.99956 | 1.0044  | 1.99461 |
| 1.99529 | 1.04677 | 2.00063 | 1.0329  | 2.00812 | 0.99178 | 2.00594 |
| 2.00502 | 1.02714 | 2.0089  | 1.01421 | 2.01002 | 0.97015 | 2.01009 |
| 2.00802 | 1.01167 | 2.01128 | 1.01818 | 2.01074 | 0.97784 | 2.0111  |
| 2.00886 | 1.02458 | 2.01193 | 1.02025 | 2.01094 | 0.98479 | 2.01146 |
| 2.0091  | 1.035   | 2.01218 | 1.00941 | 2.01096 | 0.97951 | 2.01157 |
| 2.00919 | 1.03495 | 2.01223 | 0.99525 | 2.01097 | 0.96047 | 2.01161 |
| 2.00923 | 1.02481 | 2.01227 | 1.00447 | 2.01099 | 0.9658  | 2.01163 |
| 2.00923 | 1.01573 | 2.01231 | 1.02067 | 2.011   | 0.99646 | 2.01166 |

| T120K-PA | moH     | T150K-PA | moH     | T200K-PA | moH     | T300K-PA |
|----------|---------|----------|---------|----------|---------|----------|
| 1.01429  | 2.01034 | 1.00493  | 2.01013 | 1.01259  | 2.01105 | 1.0208   |
| 1.00309  | 2.01036 | 1.01282  | 2.01009 | 1.00257  | 2.01104 | 1.00988  |
| 0.99998  | 2.01038 | 1.02787  | 2.01006 | 0.99611  | 2.01107 | 0.99363  |
| 1.01756  | 2.00912 | 1.0258   | 2.00877 | 1.0074   | 2.01026 | 1.01058  |
| 1.00024  | 2.0012  | 1.00139  | 1.99947 | 1.01093  | 2.00224 | 1.00936  |
| 0.9856   | 1.98611 | 0.98172  | 1.984   | 1.00711  | 1.98716 | 0.98747  |
| 0.99472  | 1.96883 | 0.96906  | 1.96723 | 0.98115  | 1.97007 | 0.98381  |
| 0.99519  | 1.95158 | 0.97858  | 1.95013 | 0.97637  | 1.95296 | 0.99619  |
| 0.99841  | 1.93459 | 1.00521  | 1.93266 | 0.98946  | 1.9353  | 1.00985  |
| 1.00978  | 1.91732 | 0.99744  | 1.91572 | 1.009    | 1.91853 | 0.99832  |
| 1.00534  | 1.90186 | 0.99922  | 1.90042 | 1.02348  | 1.90335 | 0.9949   |
| 0.99949  | 1.88562 | 1.00306  | 1.88416 | 1.00259  | 1.88727 | 1.00156  |
| 0.99399  | 1.86797 | 0.98919  | 1.86628 | 0.99305  | 1.86966 | 0.9862   |
| 0.98232  | 1.85065 | 1.00372  | 1.849   | 0.98819  | 1.85209 | 0.99745  |
| 0.9853   | 1.83353 | 1.01175  | 1.83182 | 0.98769  | 1.83476 | 1.00458  |
| 1.00203  | 1.81416 | 0.98571  | 1.81266 | 0.98081  | 1.81542 | 0.99487  |
| 1.01714  | 1.79546 | 0.98033  | 1.79403 | 0.97731  | 1.79678 | 1.01317  |
| 0.99791  | 1.77856 | 0.99055  | 1.77683 | 0.97624  | 1.77988 | 1.015    |
| 0.99011  | 1.76192 | 0.99672  | 1.76024 | 0.9811   | 1.76298 | 0.99376  |
| 1.00338  | 1.74522 | 0.98999  | 1.7439  | 0.99345  | 1.74641 | 1.00066  |
| 1.00379  | 1.72866 | 0.97196  | 1.72732 | 0.97772  | 1.73016 | 1.01409  |
| 0.99647  | 1.71356 | 0.98882  | 1.71213 | 0.98772  | 1.71555 | 1.00873  |
| 0.98874  | 1.69773 | 1.01565  | 1.69595 | 0.99074  | 1.69959 | 1.00469  |
| 0.99671  | 1.67991 | 1.01167  | 1.67817 | 0.9863   | 1.68126 | 1.00803  |
| 0.99491  | 1.66187 | 1.00368  | 1.6599  | 1.00452  | 1.66324 | 1.00268  |
| 0.9808   | 1.64384 | 1.00355  | 1.64194 | 0.99713  | 1.64508 | 0.98845  |
| 0.97376  | 1.62597 | 0.98454  | 1.62394 | 0.98263  | 1.62708 | 0.98352  |
| 0.98054  | 1.61239 | 0.98917  | 1.61044 | 0.99202  | 1.61388 | 0.99978  |
| 0.98854  | 1.59781 | 0.98739  | 1.59578 | 1.01002  | 1.59961 | 1.00711  |
| 0.98962  | 1.57963 | 1.00136  | 1.57752 | 1.02253  | 1.58135 | 1.0031   |
| 0.99325  | 1.5609  | 1.00883  | 1.55938 | 1.01641  | 1.5626  | 1.00411  |
| 0.99484  | 1.5421  | 0.98652  | 1.54046 | 1.00121  | 1.54368 | 0.99649  |
| 0.99844  | 1.52376 | 0.98209  | 1.5222  | 0.9913   | 1.5252  | 0.99181  |
| 0.98331  | 1.50606 | 0.98353  | 1.50444 | 0.99015  | 1.50807 | 0.99734  |
| 0.98313  | 1.48902 | 1.00457  | 1.48718 | 0.99887  | 1.49068 | 0.99543  |
| 1.00673  | 1.47173 | 1.00635  | 1.46995 | 0.99291  | 1.4734  | 0.99218  |
| 0.99204  | 1.45464 | 0.99347  | 1.45256 | 0.9928   | 1.45604 | 0.97598  |
| 0.97672  | 1.43745 | 0.99921  | 1.43563 | 1.00338  | 1.43877 | 0.98168  |
| 0.98617  | 1.41861 | 0.99954  | 1.41591 | 0.98717  | 1.41905 | 0.99854  |
| 0.97637  | 1.39928 | 0.98241  | 1.39697 | 0.99636  | 1.40029 | 0.99367  |
| 0.9703   | 1.38204 | 0.98609  | 1.38041 | 0.99024  | 1.38371 | 0.98501  |
| 1.00034  | 1.36569 | 0.9861   | 1.36389 | 0.97864  | 1.36694 | 0.98643  |
| 1.00207  | 1.34907 | 1.00146  | 1.34774 | 1.00041  | 1.35081 | 1.01167  |
| 0.99275  | 1.33286 | 1.0134   | 1.33133 | 1.00356  | 1.33456 | 1.0081   |
| 1.00873  | 1.31747 | 1.00047  | 1.31555 | 0.99698  | 1.31927 | 1.00969  |
| 1.02223  | 1.30096 | 1.00738  | 1.2994  | 0.9882   | 1.30286 | 1.02025  |

|         |         |         |         |         |         |         |
|---------|---------|---------|---------|---------|---------|---------|
| 1.01852 | 1.28354 | 1.0057  | 1.28169 | 0.99656 | 1.2856  | 1.0015  |
| 1.0069  | 1.26631 | 0.99402 | 1.26414 | 0.99062 | 1.26815 | 0.98178 |
| 1.00143 | 1.24867 | 0.98809 | 1.24687 | 0.9811  | 1.25023 | 0.99187 |
| 0.99259 | 1.23124 | 0.99109 | 1.22961 | 0.99665 | 1.23268 | 1.0241  |
| 0.99027 | 1.21509 | 1.00063 | 1.21323 | 1.00865 | 1.21675 | 1.03258 |
| 1.00013 | 1.19812 | 0.98912 | 1.19674 | 1.00854 | 1.20004 | 1.01189 |
| 0.99824 | 1.18055 | 0.99383 | 1.17908 | 0.99411 | 1.18268 | 1.00055 |
| 1.00129 | 1.16273 | 1.00409 | 1.16085 | 0.98717 | 1.16496 | 0.99993 |
| 1.0049  | 1.1449  | 0.99937 | 1.14319 | 0.99699 | 1.14728 | 0.99497 |
| 1.01055 | 1.12754 | 1.00761 | 1.12553 | 1.00746 | 1.12939 | 0.99787 |
| 1.01112 | 1.10993 | 1.00809 | 1.10809 | 1.00496 | 1.11188 | 0.99651 |
| 0.98874 | 1.09279 | 1.00397 | 1.09084 | 0.98984 | 1.09451 | 1.00229 |
| 0.98844 | 1.0758  | 0.99452 | 1.07392 | 0.9923  | 1.07755 | 1.01132 |
| 0.99955 | 1.05823 | 0.98215 | 1.05664 | 1.01048 | 1.06014 | 1.00485 |
| 1.001   | 1.04101 | 0.99465 | 1.03931 | 0.99648 | 1.04301 | 1.01006 |
| 0.99234 | 1.02374 | 1.01205 | 1.02191 | 0.98142 | 1.02559 | 0.9927  |
| 0.97994 | 1.00628 | 1.00265 | 1.00444 | 0.98908 | 1.00822 | 0.96955 |
| 0.98501 | 0.98935 | 1.00324 | 0.98745 | 0.99898 | 0.99096 | 0.98506 |
| 0.99045 | 0.97254 | 1.01365 | 0.97064 | 1.00449 | 0.97394 | 0.99066 |
| 0.98705 | 0.95541 | 1.01081 | 0.95366 | 1.01281 | 0.95741 | 0.98858 |
| 0.99635 | 0.93829 | 0.99764 | 0.93655 | 1.01365 | 0.9405  | 0.9933  |
| 1.00908 | 0.92056 | 0.99595 | 0.91875 | 0.99945 | 0.92237 | 0.98553 |
| 0.99245 | 0.90326 | 0.99859 | 0.90144 | 0.99758 | 0.90481 | 0.98266 |
| 0.97977 | 0.88652 | 1.00259 | 0.88496 | 0.99487 | 0.88853 | 0.99037 |
| 0.99102 | 0.86946 | 1.00646 | 0.86785 | 0.99075 | 0.87128 | 0.99945 |
| 0.98549 | 0.85223 | 1.00539 | 0.85042 | 0.98102 | 0.85408 | 0.98986 |
| 0.96977 | 0.83543 | 1.00863 | 0.83386 | 0.99516 | 0.8376  | 0.9871  |
| 0.97695 | 0.81789 | 1.00133 | 0.81639 | 1.00876 | 0.82021 | 1.00073 |
| 0.98403 | 0.80031 | 1.00283 | 0.79853 | 0.98829 | 0.80276 | 1.00723 |
| 0.98531 | 0.78335 | 0.99001 | 0.78159 | 0.98387 | 0.78578 | 0.99713 |
| 1.00687 | 0.76576 | 0.98558 | 0.76436 | 0.99967 | 0.76814 | 0.9913  |
| 1.00097 | 0.74831 | 0.99035 | 0.74691 | 0.99476 | 0.75091 | 0.99525 |
| 0.99603 | 0.73179 | 0.98408 | 0.73032 | 0.97747 | 0.73414 | 0.98644 |
| 0.9929  | 0.71521 | 0.99539 | 0.71388 | 0.99529 | 0.7175  | 0.97614 |
| 0.98109 | 0.69826 | 0.99487 | 0.69661 | 1.00765 | 0.70052 | 0.98698 |
| 0.97992 | 0.68122 | 0.9861  | 0.6792  | 1.00732 | 0.68309 | 0.98813 |
| 0.96924 | 0.66295 | 0.99155 | 0.66102 | 1.00005 | 0.66517 | 0.97579 |
| 0.98006 | 0.64507 | 0.99634 | 0.64379 | 1.00083 | 0.64719 | 0.98178 |
| 0.98733 | 0.62843 | 0.97985 | 0.627   | 0.99486 | 0.63056 | 0.9855  |
| 0.98014 | 0.61228 | 0.97345 | 0.61097 | 0.97958 | 0.61455 | 0.99273 |
| 0.9728  | 0.5958  | 0.97913 | 0.59401 | 0.97688 | 0.59802 | 0.99158 |
| 0.96363 | 0.57817 | 0.98352 | 0.57663 | 0.98487 | 0.58058 | 0.98559 |
| 0.97378 | 0.56125 | 0.986   | 0.55964 | 1.00433 | 0.56318 | 0.9718  |
| 0.98013 | 0.544   | 0.97519 | 0.5424  | 0.99889 | 0.54618 | 0.95537 |
| 0.97459 | 0.52648 | 0.96959 | 0.52527 | 0.97177 | 0.52897 | 0.9716  |
| 0.98004 | 0.50973 | 0.97581 | 0.50848 | 0.96947 | 0.51235 | 0.9846  |
| 0.96851 | 0.49272 | 0.97656 | 0.49126 | 0.96912 | 0.49511 | 0.96489 |

|          |          |          |          |          |          |          |
|----------|----------|----------|----------|----------|----------|----------|
| 0.95198  | 0.47442  | 0.96576  | 0.47257  | 0.96202  | 0.47656  | 0.95425  |
| 0.9571   | 0.45604  | 0.96687  | 0.45432  | 0.97664  | 0.45788  | 0.96904  |
| 0.95565  | 0.43868  | 0.96533  | 0.43713  | 0.98872  | 0.4405   | 0.96152  |
| 0.93944  | 0.42191  | 0.95897  | 0.42002  | 0.96858  | 0.4236   | 0.96009  |
| 0.95097  | 0.40489  | 0.96248  | 0.40338  | 0.95697  | 0.40698  | 0.95446  |
| 0.95935  | 0.3883   | 0.96104  | 0.38664  | 0.96295  | 0.39029  | 0.93944  |
| 0.93389  | 0.37138  | 0.95246  | 0.36954  | 0.94182  | 0.37357  | 0.93292  |
| 0.94009  | 0.35423  | 0.93831  | 0.35224  | 0.93678  | 0.35609  | 0.9244   |
| 0.94186  | 0.33689  | 0.94534  | 0.33514  | 0.95127  | 0.33868  | 0.93608  |
| 0.93016  | 0.31939  | 0.95673  | 0.31734  | 0.92503  | 0.32087  | 0.93026  |
| 0.91527  | 0.30175  | 0.93843  | 0.29985  | 0.9007   | 0.30333  | 0.90364  |
| 0.89155  | 0.28434  | 0.912    | 0.28245  | 0.90788  | 0.28579  | 0.89581  |
| 0.88649  | 0.26728  | 0.90089  | 0.26531  | 0.91363  | 0.26894  | 0.89751  |
| 0.89033  | 0.25032  | 0.89389  | 0.24838  | 0.90112  | 0.25186  | 0.88817  |
| 0.8778   | 0.23271  | 0.8845   | 0.23111  | 0.87366  | 0.23439  | 0.87102  |
| 0.86445  | 0.21474  | 0.86275  | 0.21297  | 0.84851  | 0.21631  | 0.85724  |
| 0.86585  | 0.19696  | 0.837    | 0.1953   | 0.84379  | 0.19861  | 0.83657  |
| 0.84022  | 0.17969  | 0.82009  | 0.17787  | 0.82976  | 0.18113  | 0.82227  |
| 0.80269  | 0.16247  | 0.80116  | 0.16076  | 0.80126  | 0.16381  | 0.82161  |
| 0.79547  | 0.14542  | 0.78121  | 0.14342  | 0.77943  | 0.14703  | 0.78926  |
| 0.76669  | 0.12781  | 0.7515   | 0.12557  | 0.75765  | 0.12936  | 0.75483  |
| 0.73304  | 0.11007  | 0.72489  | 0.10803  | 0.72906  | 0.11145  | 0.71889  |
| 0.69805  | 0.09291  | 0.68726  | 0.08997  | 0.68884  | 0.09396  | 0.68713  |
| 0.64618  | 0.07489  | 0.64184  | 0.07222  | 0.64322  | 0.0757   | 0.65229  |
| 0.59862  | 0.05685  | 0.58434  | 0.05483  | 0.59728  | 0.05776  | 0.61001  |
| 0.54765  | 0.04005  | 0.50785  | 0.03809  | 0.53778  | 0.04116  | 0.5416   |
| 0.47632  | 0.02371  | 0.44056  | 0.02195  | 0.44942  | 0.0253   | 0.44564  |
| 0.37474  | 0.00361  | 0.35991  | 0.00235  | 0.33957  | 0.00574  | 0.36494  |
| 0.25957  | -0.01696 | 0.25731  | -0.01805 | 0.23881  | -0.01413 | 0.26083  |
| 0.14788  | -0.03544 | 0.13589  | -0.03647 | 0.12972  | -0.03212 | 0.13577  |
| 0.04376  | -0.05457 | 0.02823  | -0.05613 | -0.00553 | -0.05173 | 0.00392  |
| -0.05253 | -0.07037 | -0.0753  | -0.07194 | -0.10786 | -0.06799 | -0.11473 |
| -0.15944 | -0.08563 | -0.17827 | -0.08679 | -0.19815 | -0.08347 | -0.19128 |
| -0.26493 | -0.10168 | -0.26465 | -0.1031  | -0.29615 | -0.09931 | -0.2789  |
| -0.34799 | -0.11814 | -0.36157 | -0.11937 | -0.36926 | -0.11504 | -0.39238 |
| -0.42652 | -0.13545 | -0.45634 | -0.1364  | -0.46076 | -0.13212 | -0.48512 |
| -0.49935 | -0.15187 | -0.53844 | -0.15201 | -0.55111 | -0.1496  | -0.56748 |
| -0.5794  | -0.16709 | -0.60064 | -0.16814 | -0.62139 | -0.16564 | -0.63927 |
| -0.65081 | -0.18375 | -0.67675 | -0.18518 | -0.70399 | -0.18226 | -0.7054  |
| -0.70326 | -0.20099 | -0.74236 | -0.20233 | -0.76988 | -0.1997  | -0.77308 |
| -0.76675 | -0.21769 | -0.79936 | -0.21936 | -0.82005 | -0.21645 | -0.82992 |
| -0.82481 | -0.23517 | -0.85949 | -0.23692 | -0.85953 | -0.23389 | -0.87287 |
| -0.86267 | -0.25269 | -0.89263 | -0.25439 | -0.88257 | -0.25168 | -0.89883 |
| -0.89536 | -0.27023 | -0.91306 | -0.27185 | -0.91584 | -0.26883 | -0.90977 |
| -0.92439 | -0.28774 | -0.92764 | -0.2896  | -0.93358 | -0.28638 | -0.92913 |
| -0.93474 | -0.30491 | -0.9382  | -0.3064  | -0.95889 | -0.30391 | -0.94342 |
| -0.93279 | -0.3221  | -0.94302 | -0.32332 | -0.96513 | -0.32058 | -0.9467  |

|          |          |          |          |          |          |          |
|----------|----------|----------|----------|----------|----------|----------|
| -0.9498  | -0.33888 | -0.94222 | -0.34032 | -0.95026 | -0.33744 | -0.95851 |
| -0.96734 | -0.35599 | -0.9601  | -0.3575  | -0.9677  | -0.35422 | -0.96311 |
| -0.99296 | -0.37317 | -0.97661 | -0.37454 | -0.99012 | -0.37128 | -0.968   |
| -1.00331 | -0.39032 | -0.98269 | -0.39169 | -0.98824 | -0.38857 | -0.97541 |
| -0.99332 | -0.40781 | -0.99608 | -0.40895 | -0.98379 | -0.40586 | -0.99388 |
| -0.98944 | -0.42494 | -1.00364 | -0.42638 | -0.97764 | -0.42314 | -0.98669 |
| -0.98158 | -0.44194 | -1.00214 | -0.44323 | -0.98501 | -0.44031 | -0.96995 |
| -0.99208 | -0.45861 | -0.99693 | -0.46032 | -1.00916 | -0.45726 | -0.99141 |
| -1.00637 | -0.47567 | -1.0052  | -0.47771 | -1.00865 | -0.47472 | -0.99132 |
| -1.01659 | -0.49252 | -1.00947 | -0.4947  | -1.01267 | -0.49178 | -0.98896 |
| -1.02962 | -0.51014 | -1.01394 | -0.5123  | -1.02055 | -0.50879 | -1.01153 |
| -1.03929 | -0.52751 | -1.0288  | -0.52966 | -1.01409 | -0.52683 | -1.00692 |
| -1.03722 | -0.5447  | -1.02956 | -0.54646 | -1.01088 | -0.54443 | -0.99214 |
| -1.01099 | -0.56219 | -1.02489 | -0.56376 | -1.01989 | -0.56119 | -0.98984 |
| -0.99341 | -0.57969 | -1.03554 | -0.5817  | -1.01484 | -0.57853 | -1.00851 |
| -1.01131 | -0.59707 | -1.0349  | -0.59913 | -1.00199 | -0.59634 | -1.01949 |
| -1.016   | -0.61311 | -1.02212 | -0.61501 | -1.01136 | -0.61232 | -1.01053 |
| -1.00988 | -0.62907 | -1.01012 | -0.63117 | -1.03311 | -0.62793 | -1.00593 |
| -1.02076 | -0.64608 | -1.01196 | -0.64808 | -1.03232 | -0.64503 | -1.00075 |
| -1.02077 | -0.66379 | -1.024   | -0.66524 | -1.00709 | -0.66243 | -1.01096 |
| -1.01865 | -0.68074 | -1.02812 | -0.68254 | -1.0039  | -0.67958 | -1.01897 |
| -1.01924 | -0.69784 | -1.03586 | -0.69987 | -1.0193  | -0.69661 | -1.01052 |
| -1.01928 | -0.71568 | -1.03274 | -0.71749 | -1.03167 | -0.71451 | -1.0075  |
| -1.01289 | -0.73337 | -1.0313  | -0.73513 | -1.03718 | -0.73247 | -1.00473 |
| -1.00306 | -0.7503  | -1.02725 | -0.75215 | -1.02788 | -0.74944 | -1.00872 |
| -1.02316 | -0.767   | -1.00922 | -0.76898 | -1.02409 | -0.76577 | -1.01446 |
| -1.04801 | -0.78425 | -1.01397 | -0.78609 | -1.03021 | -0.78275 | -1.00508 |
| -1.05106 | -0.80113 | -1.03452 | -0.80274 | -1.04072 | -0.79999 | -1.01442 |
| -1.03614 | -0.81811 | -1.03522 | -0.81984 | -1.04212 | -0.81675 | -1.02555 |
| -1.01608 | -0.83544 | -1.02302 | -0.83724 | -1.03213 | -0.83408 | -1.0219  |
| -1.02308 | -0.85274 | -1.01193 | -0.85418 | -1.03796 | -0.85149 | -1.01242 |
| -1.0331  | -0.86981 | -1.02167 | -0.8713  | -1.03079 | -0.86866 | -1.0001  |
| -1.03859 | -0.88722 | -1.04417 | -0.8889  | -1.02131 | -0.8858  | -1.0015  |
| -1.03801 | -0.90378 | -1.03874 | -0.90549 | -1.02247 | -0.90254 | -1.02603 |
| -1.02865 | -0.9203  | -1.03738 | -0.92191 | -1.01673 | -0.91885 | -1.03774 |
| -1.0257  | -0.93724 | -1.05404 | -0.93915 | -1.02568 | -0.93583 | -1.02887 |
| -1.03272 | -0.95531 | -1.05367 | -0.95748 | -1.02899 | -0.95405 | -1.03627 |
| -1.03851 | -0.97342 | -1.03945 | -0.97535 | -1.02926 | -0.97224 | -1.04431 |
| -1.03433 | -0.99127 | -1.03364 | -0.99272 | -1.04004 | -0.99014 | -1.03104 |
| -1.02629 | -1.00733 | -1.02499 | -1.00907 | -1.05354 | -1.0064  | -1.0245  |
| -1.01581 | -1.02346 | -1.00702 | -1.02545 | -1.05313 | -1.02229 | -1.02862 |
| -1.01799 | -1.04046 | -1.00931 | -1.04234 | -1.04183 | -1.03914 | -1.02258 |
| -1.03576 | -1.05748 | -1.01667 | -1.05898 | -1.02946 | -1.05595 | -1.00785 |
| -1.03446 | -1.07441 | -1.01213 | -1.07569 | -1.01487 | -1.07259 | -1.00823 |
| -1.02351 | -1.09145 | -1.0217  | -1.09298 | -1.02891 | -1.0895  | -1.01252 |
| -1.01613 | -1.10934 | -1.03723 | -1.11114 | -1.03684 | -1.10773 | -1.00179 |
| -1.012   | -1.12726 | -1.0406  | -1.12874 | -1.02348 | -1.12567 | -1.00981 |



|          |          |          |          |          |          |          |
|----------|----------|----------|----------|----------|----------|----------|
| -1.02981 | -1.14466 | -1.0406  | -1.14586 | -1.02576 | -1.14304 | -1.03577 |
| -1.04441 | -1.16203 | -1.03791 | -1.16332 | -1.02141 | -1.16035 | -1.03172 |
| -1.04276 | -1.17927 | -1.02986 | -1.18098 | -1.02205 | -1.1779  | -1.02276 |
| -1.05306 | -1.19649 | -1.03216 | -1.19821 | -1.01611 | -1.19508 | -1.02147 |
| -1.05821 | -1.21274 | -1.04306 | -1.21438 | -1.02192 | -1.21094 | -1.00878 |
| -1.03282 | -1.22934 | -1.04277 | -1.23106 | -1.02801 | -1.22758 | -1.02467 |
| -1.0233  | -1.24649 | -1.0354  | -1.24821 | -1.02259 | -1.24467 | -1.03951 |
| -1.02128 | -1.2638  | -1.03851 | -1.26523 | -1.03567 | -1.26215 | -1.03392 |
| -1.01941 | -1.28104 | -1.03553 | -1.28261 | -1.05197 | -1.27955 | -1.02938 |
| -1.03395 | -1.29819 | -1.02923 | -1.30041 | -1.04806 | -1.29693 | -1.03449 |
| -1.04434 | -1.31618 | -1.04173 | -1.31816 | -1.03614 | -1.31505 | -1.03745 |
| -1.0493  | -1.33391 | -1.05315 | -1.33568 | -1.04445 | -1.33278 | -1.02528 |
| -1.04186 | -1.35181 | -1.04697 | -1.35345 | -1.03553 | -1.3507  | -1.03649 |
| -1.03918 | -1.36991 | -1.04221 | -1.37166 | -1.02843 | -1.36883 | -1.03742 |
| -1.04298 | -1.38783 | -1.03751 | -1.38947 | -1.03621 | -1.38689 | -1.03799 |
| -1.04626 | -1.40304 | -1.02978 | -1.40468 | -1.03733 | -1.4031  | -1.04589 |
| -1.03448 | -1.41864 | -1.03438 | -1.42041 | -1.03547 | -1.41798 | -1.01916 |
| -1.02048 | -1.436   | -1.02575 | -1.43734 | -1.02695 | -1.4342  | -1.02414 |
| -1.0422  | -1.45316 | -1.02224 | -1.45455 | -1.0243  | -1.45122 | -1.02652 |
| -1.0427  | -1.47044 | -1.03053 | -1.47178 | -1.0251  | -1.46866 | -1.01698 |
| -1.0319  | -1.4874  | -1.02347 | -1.48896 | -1.02053 | -1.48587 | -1.01472 |
| -1.03522 | -1.50449 | -1.01712 | -1.50604 | -1.02634 | -1.50276 | -1.01866 |
| -1.02865 | -1.52193 | -1.03468 | -1.52332 | -1.03213 | -1.51987 | -1.02709 |
| -1.02389 | -1.53958 | -1.05309 | -1.54117 | -1.02716 | -1.53755 | -1.0183  |
| -1.02492 | -1.55717 | -1.02923 | -1.55865 | -1.02549 | -1.55517 | -1.03012 |
| -1.02633 | -1.57467 | -1.01591 | -1.57613 | -1.02564 | -1.57317 | -1.0379  |
| -1.02905 | -1.5919  | -1.02745 | -1.59363 | -1.02239 | -1.59083 | -1.03535 |
| -1.03544 | -1.60767 | -1.02736 | -1.60919 | -1.02857 | -1.60634 | -1.02828 |
| -1.03224 | -1.6235  | -1.02238 | -1.62526 | -1.0244  | -1.62204 | -1.0135  |
| -1.03325 | -1.64034 | -1.01877 | -1.64185 | -1.0157  | -1.63852 | -1.02038 |
| -1.03744 | -1.65685 | -1.02124 | -1.65835 | -1.01955 | -1.65536 | -1.0362  |
| -1.03671 | -1.6735  | -1.01799 | -1.67523 | -1.03208 | -1.672   | -1.03554 |
| -1.03147 | -1.69113 | -1.01098 | -1.69297 | -1.03744 | -1.6887  | -1.03095 |
| -1.02659 | -1.70956 | -1.01428 | -1.71108 | -1.01948 | -1.70754 | -1.01951 |
| -1.01987 | -1.72676 | -1.02896 | -1.72849 | -1.01715 | -1.72537 | -1.00633 |
| -1.01084 | -1.74351 | -1.02714 | -1.74511 | -1.02128 | -1.74206 | -1.00655 |
| -1.01597 | -1.76029 | -1.01799 | -1.76175 | -1.02143 | -1.75866 | -1.01221 |
| -1.02288 | -1.77689 | -1.02421 | -1.77844 | -1.02432 | -1.77559 | -1.01706 |
| -1.02043 | -1.79433 | -1.02167 | -1.79594 | -1.0241  | -1.79266 | -1.02314 |
| -1.02815 | -1.81298 | -1.0279  | -1.81438 | -1.0297  | -1.81109 | -1.04198 |
| -1.04305 | -1.83081 | -1.04106 | -1.83273 | -1.02473 | -1.82965 | -1.03693 |
| -1.02911 | -1.84831 | -1.04077 | -1.85002 | -1.0101  | -1.84699 | -1.02445 |
| -1.02226 | -1.86562 | -1.03624 | -1.86732 | -1.0161  | -1.86415 | -1.02879 |
| -1.01832 | -1.883   | -1.04048 | -1.88451 | -1.03437 | -1.88181 | -1.02087 |
| -1.00594 | -1.89977 | -1.03664 | -1.90124 | -1.02172 | -1.89875 | -1.03748 |
| -1.03112 | -1.91672 | -1.02017 | -1.91843 | -1.0113  | -1.91548 | -1.04516 |
| -1.04342 | -1.93408 | -1.01202 | -1.93554 | -1.02013 | -1.93252 | -1.02711 |

|          |          |          |          |          |          |          |
|----------|----------|----------|----------|----------|----------|----------|
| -1.03414 | -1.95151 | -1.00794 | -1.95283 | -1.02284 | -1.9499  | -1.02462 |
| -1.03429 | -1.96886 | -1.01307 | -1.97057 | -1.02524 | -1.96733 | -1.03288 |
| -1.03164 | -1.986   | -1.016   | -1.98736 | -1.01671 | -1.98475 | -1.02557 |
| -1.01429 | -1.99691 | -1.00493 | -1.99814 | -1.01259 | -1.99728 | -1.0208  |
| -1.00737 | -2.00109 | -0.99997 | -2.00225 | -1.0083  | -2.00198 | -1.01346 |
| -1.01878 | -2.00212 | -0.9929  | -2.00333 | -0.99622 | -2.00372 | -1.01822 |
| -1.01189 | -2.0025  | -0.99111 | -2.00357 | -0.9936  | -2.00413 | -1.02453 |
| -0.99432 | -2.00261 | -1.01315 | -2.00368 | -0.99351 | -2.00421 | -1.00004 |
| -0.98763 | -2.00264 | -1.01333 | -2.00375 | -0.99713 | -2.00426 | -0.99135 |
| -1.0098  | -2.0026  | -0.99095 | -2.00375 | -1.00259 | -2.00427 | -1.00545 |
| -1.02383 | -2.00258 | -1.00037 | -2.00377 | -0.99853 | -2.00425 | -1.00962 |
| -1.01564 | -2.00258 | -1.01414 | -2.00374 | -1.00174 | -2.00431 | -0.99871 |
| -1.0142  | -2.00256 | -1.00453 | -2.00364 | -1.00051 | -2.00427 | -1.00397 |
| -1.01404 | -1.99661 | -0.98557 | -1.99756 | -0.99006 | -1.99858 | -0.99908 |
| -0.99388 | -1.98316 | -0.98202 | -1.98465 | -0.98786 | -1.98506 | -1.00021 |
| -0.98584 | -1.96668 | -0.97824 | -1.96843 | -0.98512 | -1.96858 | -1.01626 |
| -0.991   | -1.94962 | -0.98515 | -1.95125 | -0.99235 | -1.95171 | -1.00389 |
| -0.99619 | -1.93247 | -0.98791 | -1.93421 | -0.99483 | -1.93468 | -0.99628 |
| -0.99958 | -1.9158  | -0.99159 | -1.9174  | -1.0005  | -1.91765 | -1.00221 |
| -0.99414 | -1.89921 | -1.00327 | -1.90096 | -0.99644 | -1.90107 | -0.98751 |
| -0.97994 | -1.88263 | -0.9879  | -1.88415 | -0.98097 | -1.88455 | -0.99734 |
| -0.98035 | -1.86552 | -0.97679 | -1.86713 | -0.98897 | -1.86752 | -1.01262 |
| -0.9945  | -1.84795 | -0.99214 | -1.84983 | -0.9846  | -1.84994 | -0.99579 |
| -0.98917 | -1.83062 | -1.00871 | -1.83237 | -0.97469 | -1.8324  | -1.00173 |
| -0.98463 | -1.81329 | -0.99752 | -1.81484 | -0.99117 | -1.81484 | -0.99826 |
| -0.98322 | -1.79459 | -0.98584 | -1.79613 | -0.98832 | -1.79634 | -0.99535 |
| -0.9728  | -1.77684 | -0.98961 | -1.77831 | -0.9864  | -1.77854 | -0.99816 |
| -0.97933 | -1.76016 | -1.00859 | -1.76168 | -0.993   | -1.7618  | -0.99677 |
| -0.99107 | -1.74348 | -0.99273 | -1.74471 | -0.98602 | -1.74498 | -1.0024  |
| -0.99404 | -1.72667 | -0.97758 | -1.72815 | -0.98737 | -1.72848 | -0.99111 |
| -1.00009 | -1.70939 | -0.97342 | -1.7108  | -0.98914 | -1.71114 | -0.98602 |
| -0.98225 | -1.69099 | -0.96102 | -1.69249 | -0.98932 | -1.69267 | -0.97585 |
| -0.98209 | -1.67355 | -0.97737 | -1.67486 | -0.98963 | -1.67524 | -0.97026 |
| -0.99267 | -1.65684 | -0.97605 | -1.65789 | -0.98157 | -1.65828 | -0.97608 |
| -0.99671 | -1.6402  | -0.96231 | -1.64145 | -0.97794 | -1.64166 | -0.98115 |
| -1.00352 | -1.62341 | -0.97805 | -1.62501 | -0.98858 | -1.62509 | -0.98809 |
| -0.99508 | -1.60743 | -0.98831 | -1.6088  | -0.98804 | -1.60931 | -0.99035 |
| -0.99146 | -1.59179 | -1.00594 | -1.59296 | -0.97427 | -1.59337 | -0.99956 |
| -0.9921  | -1.57458 | -1.01261 | -1.57608 | -0.97728 | -1.57623 | -0.99086 |
| -0.99393 | -1.55669 | -1.00457 | -1.55819 | -0.99409 | -1.55851 | -0.96859 |
| -0.99588 | -1.53942 | -1.00207 | -1.54063 | -0.99458 | -1.54098 | -0.9744  |
| -0.99071 | -1.52165 | -0.9812  | -1.52292 | -0.98297 | -1.52321 | -0.98286 |
| -0.98783 | -1.50439 | -0.97518 | -1.50571 | -0.977   | -1.50588 | -0.98006 |
| -0.99726 | -1.48722 | -0.97701 | -1.48874 | -0.98297 | -1.48878 | -0.99181 |
| -1.01297 | -1.47019 | -0.99153 | -1.47159 | -0.98318 | -1.47159 | -0.99424 |
| -1.00519 | -1.4528  | -0.99823 | -1.45441 | -0.99861 | -1.45424 | -0.9852  |
| -1.00303 | -1.43523 | -1.00268 | -1.43675 | -1.00869 | -1.43711 | -1.00355 |

|          |          |          |          |          |          |          |
|----------|----------|----------|----------|----------|----------|----------|
| -1.00975 | -1.41817 | -0.99882 | -1.4193  | -0.98069 | -1.41967 | -0.99998 |
| -1.00367 | -1.40297 | -0.99137 | -1.40457 | -0.98805 | -1.40524 | -0.98842 |
| -1.00346 | -1.38724 | -1.00986 | -1.38904 | -1.01131 | -1.38959 | -1.0002  |
| -1.00463 | -1.3699  | -1.005   | -1.37144 | -1.00191 | -1.37202 | -1.00124 |
| -1.01328 | -1.35192 | -0.9928  | -1.35341 | -1.0029  | -1.35406 | -0.99427 |
| -1.00247 | -1.3341  | -0.99288 | -1.33568 | -0.98872 | -1.33608 | -0.99781 |
| -0.9862  | -1.3163  | -0.99659 | -1.31801 | -0.9757  | -1.31824 | -0.99534 |
| -1.00241 | -1.2985  | -0.99553 | -1.29978 | -0.98545 | -1.30022 | -0.98013 |
| -1.01507 | -1.28089 | -0.9878  | -1.28227 | -0.99012 | -1.28251 | -0.97397 |
| -1.00653 | -1.2636  | -0.99461 | -1.26515 | -0.98859 | -1.26522 | -0.99116 |
| -0.99626 | -1.24622 | -0.99113 | -1.24757 | -0.99129 | -1.24778 | -0.98943 |
| -0.98932 | -1.22921 | -0.99071 | -1.23036 | -0.99565 | -1.23063 | -0.9946  |
| -0.99504 | -1.21232 | -0.99558 | -1.21373 | -0.99064 | -1.21417 | -1.00042 |
| -0.99775 | -1.19579 | -0.98871 | -1.19732 | -0.99801 | -1.19796 | -0.98146 |
| -1.0011  | -1.1787  | -0.97891 | -1.18028 | -0.99814 | -1.18057 | -0.98223 |
| -1.00368 | -1.16137 | -0.98392 | -1.16299 | -0.9846  | -1.16313 | -0.98974 |
| -1.00513 | -1.14388 | -0.99569 | -1.14552 | -0.99805 | -1.14556 | -1.00279 |
| -1.01561 | -1.12644 | -0.99378 | -1.12806 | -1.00673 | -1.12828 | -1.00948 |
| -1.00103 | -1.10858 | -0.99355 | -1.11016 | -0.99736 | -1.1101  | -1.00122 |
| -0.9888  | -1.09095 | -0.99318 | -1.09242 | -1.00148 | -1.09233 | -0.99834 |
| -1.00282 | -1.07383 | -0.98984 | -1.07527 | -0.99231 | -1.07527 | -0.99134 |
| -0.99662 | -1.05691 | -0.98831 | -1.05832 | -0.98916 | -1.05828 | -0.9854  |
| -0.99034 | -1.03982 | -1.00517 | -1.04132 | -1.00194 | -1.04138 | -0.98036 |
| -0.98858 | -1.02299 | -1.01621 | -1.02441 | -1.00608 | -1.02448 | -0.98057 |
| -0.97822 | -1.00706 | -1.00235 | -1.00849 | -0.99849 | -1.00878 | -1.00022 |
| -0.9964  | -0.99044 | -0.99954 | -0.99218 | -0.99876 | -0.99271 | -0.98634 |
| -0.99112 | -0.97314 | -1.00736 | -0.97447 | -1.0019  | -0.97525 | -0.98346 |
| -0.97843 | -0.95501 | -1.00687 | -0.95609 | -1.0087  | -0.95652 | -0.99949 |
| -0.98311 | -0.9369  | -1.01132 | -0.938   | -1.01296 | -0.93845 | -0.97953 |
| -0.99246 | -0.91995 | -1.01048 | -0.92091 | -0.99956 | -0.92105 | -0.97329 |
| -1.00349 | -0.90362 | -0.99719 | -0.90446 | -0.97888 | -0.90499 | -0.97638 |
| -0.9934  | -0.88681 | -0.99058 | -0.88791 | -0.97716 | -0.88831 | -0.96644 |
| -0.99155 | -0.86912 | -0.99434 | -0.87067 | -1.00007 | -0.87106 | -0.97993 |
| -0.99783 | -0.85198 | -1.008   | -0.85344 | -1.00496 | -0.85377 | -1.00083 |
| -1.00198 | -0.83452 | -1.01314 | -0.83634 | -1.0023  | -0.8365  | -1.00853 |
| -0.99374 | -0.81705 | -1.00918 | -0.81869 | -0.99645 | -0.81925 | -0.99231 |
| -0.99536 | -0.80057 | -1.00563 | -0.80185 | -0.98813 | -0.80237 | -0.9705  |
| -0.99448 | -0.78354 | -1.00163 | -0.78479 | -0.99206 | -0.78512 | -0.97338 |
| -0.98506 | -0.76624 | -0.99261 | -0.76754 | -0.98937 | -0.76792 | -0.97986 |
| -0.9967  | -0.74935 | -0.98346 | -0.7508  | -0.98751 | -0.75143 | -0.97699 |
| -1.00684 | -0.73261 | -0.97979 | -0.734   | -0.99685 | -0.73483 | -0.95986 |
| -1.009   | -0.71487 | -0.98691 | -0.71644 | -1.00349 | -0.71694 | -0.96586 |
| -0.9951  | -0.69718 | -0.98168 | -0.69869 | -0.992   | -0.69909 | -0.97526 |
| -0.9744  | -0.6799  | -0.97874 | -0.68125 | -0.97879 | -0.682   | -0.96076 |
| -0.96692 | -0.66264 | -0.99145 | -0.66378 | -0.99058 | -0.66461 | -0.96657 |
| -0.97977 | -0.64514 | -0.98767 | -0.6467  | -0.98971 | -0.64707 | -0.98715 |
| -0.98968 | -0.62808 | -0.97512 | -0.62965 | -0.9841  | -0.63009 | -0.98683 |

|          |          |          |          |          |          |          |
|----------|----------|----------|----------|----------|----------|----------|
| -0.99007 | -0.61272 | -0.98528 | -0.61384 | -0.99069 | -0.61464 | -0.98157 |
| -0.97608 | -0.59632 | -0.9984  | -0.5976  | -0.99124 | -0.59856 | -0.97891 |
| -0.97189 | -0.57869 | -0.98774 | -0.58005 | -0.98945 | -0.58076 | -0.97574 |
| -0.96682 | -0.56103 | -0.98511 | -0.56264 | -0.97508 | -0.56315 | -0.9803  |
| -0.9667  | -0.54374 | -0.98596 | -0.54517 | -0.96584 | -0.5461  | -0.97629 |
| -0.971   | -0.52685 | -0.98504 | -0.52806 | -0.97181 | -0.529   | -0.98419 |
| -0.96936 | -0.50892 | -0.98739 | -0.51025 | -0.96623 | -0.51127 | -0.98118 |
| -0.96993 | -0.49157 | -0.97435 | -0.493   | -0.9693  | -0.49396 | -0.96573 |
| -0.96913 | -0.47456 | -0.95482 | -0.47587 | -0.98059 | -0.47726 | -0.96771 |
| -0.96969 | -0.45702 | -0.95746 | -0.45853 | -0.97522 | -0.45994 | -0.97992 |
| -0.94683 | -0.44015 | -0.95976 | -0.44157 | -0.96722 | -0.4428  | -0.97236 |
| -0.93114 | -0.42344 | -0.956   | -0.42475 | -0.95908 | -0.42545 | -0.95008 |
| -0.94963 | -0.40606 | -0.9514  | -0.40717 | -0.95543 | -0.40763 | -0.94172 |
| -0.96336 | -0.38909 | -0.95814 | -0.39003 | -0.95334 | -0.39047 | -0.93803 |
| -0.94851 | -0.37194 | -0.96947 | -0.37289 | -0.95458 | -0.3734  | -0.94862 |
| -0.93899 | -0.35468 | -0.95356 | -0.35575 | -0.94941 | -0.35596 | -0.93771 |
| -0.94573 | -0.33746 | -0.93668 | -0.33855 | -0.95059 | -0.33911 | -0.91557 |
| -0.94074 | -0.32048 | -0.92841 | -0.32124 | -0.95552 | -0.32229 | -0.91122 |
| -0.93009 | -0.30392 | -0.93778 | -0.30442 | -0.93742 | -0.30554 | -0.90941 |
| -0.92182 | -0.28653 | -0.92281 | -0.28755 | -0.92598 | -0.2882  | -0.90683 |
| -0.91193 | -0.26902 | -0.90199 | -0.26999 | -0.90721 | -0.27074 | -0.89285 |
| -0.89368 | -0.2517  | -0.90131 | -0.25267 | -0.88865 | -0.25344 | -0.88058 |
| -0.88155 | -0.23427 | -0.88974 | -0.23513 | -0.88444 | -0.23575 | -0.89053 |
| -0.87343 | -0.2168  | -0.86478 | -0.21754 | -0.86862 | -0.21835 | -0.87745 |
| -0.84493 | -0.19955 | -0.84703 | -0.20049 | -0.8587  | -0.20128 | -0.84469 |
| -0.81844 | -0.18246 | -0.85368 | -0.18353 | -0.85419 | -0.18411 | -0.8331  |
| -0.8054  | -0.16471 | -0.83859 | -0.16582 | -0.83254 | -0.16644 | -0.81191 |
| -0.79119 | -0.14949 | -0.8079  | -0.1504  | -0.80745 | -0.14872 | -0.78075 |
| -0.78054 | -0.13356 | -0.78352 | -0.13422 | -0.78233 | -0.13228 | -0.76081 |
| -0.76575 | -0.11592 | -0.76271 | -0.11643 | -0.75292 | -0.1155  | -0.74665 |
| -0.70558 | -0.09904 | -0.73409 | -0.09967 | -0.7168  | -0.09941 | -0.71867 |
| -0.6574  | -0.08227 | -0.6813  | -0.08312 | -0.66612 | -0.08328 | -0.67984 |
| -0.63375 | -0.06733 | -0.62385 | -0.06831 | -0.63031 | -0.068   | -0.64181 |
| -0.57169 | -0.04998 | -0.55868 | -0.05092 | -0.58177 | -0.05032 | -0.58486 |
| -0.48479 | -0.0308  | -0.48605 | -0.03174 | -0.51722 | -0.03097 | -0.49578 |
| -0.38463 | -0.01317 | -0.40246 | -0.01419 | -0.42993 | -0.01364 | -0.38587 |
| -0.27296 | 0.00538  | -0.32194 | 0.00401  | -0.30439 | 0.00441  | -0.27584 |
| -0.15009 | 0.02513  | -0.22461 | 0.02402  | -0.19147 | 0.02425  | -0.18524 |
| -0.04653 | 0.04324  | -0.10704 | 0.04225  | -0.08871 | 0.0423   | -0.08062 |
| 0.04521  | 0.06037  | 0.0102   | 0.05891  | 0.02433  | 0.05882  | 0.05304  |
| 0.15657  | 0.0775   | 0.12134  | 0.07586  | 0.12881  | 0.07571  | 0.1618   |
| 0.24949  | 0.09451  | 0.21849  | 0.09311  | 0.22722  | 0.09259  | 0.24905  |
| 0.33463  | 0.11222  | 0.31487  | 0.11104  | 0.34111  | 0.11069  | 0.33313  |
| 0.41523  | 0.12974  | 0.40306  | 0.12851  | 0.43742  | 0.12868  | 0.41183  |
| 0.50028  | 0.1467   | 0.49205  | 0.14581  | 0.50034  | 0.14574  | 0.52251  |
| 0.58457  | 0.16338  | 0.5766   | 0.16254  | 0.57551  | 0.1624   | 0.61846  |
| 0.64912  | 0.1807   | 0.64002  | 0.17929  | 0.66208  | 0.17947  | 0.68823  |

|         |         |         |         |         |         |         |
|---------|---------|---------|---------|---------|---------|---------|
| 0.72619 | 0.19799 | 0.69462 | 0.19652 | 0.74174 | 0.19663 | 0.75411 |
| 0.78637 | 0.21583 | 0.7753  | 0.21449 | 0.79726 | 0.21423 | 0.79946 |
| 0.82696 | 0.23381 | 0.84698 | 0.23253 | 0.83036 | 0.23222 | 0.8427  |
| 0.85556 | 0.2512  | 0.87973 | 0.25022 | 0.86858 | 0.25007 | 0.87929 |
| 0.87807 | 0.26813 | 0.91825 | 0.26725 | 0.90514 | 0.2673  | 0.89912 |
| 0.9101  | 0.28503 | 0.92825 | 0.2842  | 0.95023 | 0.28412 | 0.92564 |
| 0.9245  | 0.30255 | 0.93261 | 0.30119 | 0.94693 | 0.30146 | 0.94772 |
| 0.94392 | 0.32009 | 0.94349 | 0.31863 | 0.95945 | 0.31904 | 0.94015 |
| 0.96071 | 0.33769 | 0.94135 | 0.33655 | 0.98632 | 0.33628 | 0.95056 |
| 0.95854 | 0.35493 | 0.95629 | 0.3538  | 0.97175 | 0.35365 | 0.9675  |
| 0.95966 | 0.37175 | 0.96144 | 0.37062 | 0.99    | 0.37074 | 0.96128 |
| 0.97287 | 0.38846 | 0.96181 | 0.38752 | 0.99286 | 0.38752 | 0.95899 |
| 0.97763 | 0.40554 | 0.97994 | 0.40461 | 0.97738 | 0.40451 | 0.9704  |
| 0.97497 | 0.42236 | 0.99118 | 0.42176 | 0.99178 | 0.42185 | 0.98741 |
| 0.98704 | 0.43927 | 1.00225 | 0.43838 | 1.00959 | 0.43885 | 0.99151 |
| 0.98837 | 0.45645 | 1.0044  | 0.45564 | 1.01421 | 0.45545 | 0.99958 |
| 0.98912 | 0.47454 | 0.9986  | 0.47405 | 1.02017 | 0.47418 | 0.99826 |
| 0.99814 | 0.49275 | 1.00686 | 0.49241 | 1.01218 | 0.49269 | 0.99445 |
| 0.99634 | 0.51009 | 1.02028 | 0.50959 | 0.99592 | 0.51014 | 1.00098 |
| 0.98364 | 0.52684 | 1.03395 | 0.5264  | 1.01529 | 0.52702 | 1.00183 |
| 0.98215 | 0.54434 | 1.02353 | 0.5435  | 1.03036 | 0.5441  | 1.00406 |
| 0.99882 | 0.56133 | 1.00294 | 0.56056 | 1.02195 | 0.56162 | 1.00795 |
| 1.01213 | 0.57826 | 1.01073 | 0.57757 | 1.01925 | 0.57848 | 1.01433 |
| 1.02902 | 0.59608 | 1.01624 | 0.59518 | 1.02056 | 0.59551 | 1.02713 |
| 1.03027 | 0.61255 | 1.01723 | 0.61182 | 1.01671 | 0.61259 | 1.02882 |
| 1.01901 | 0.62886 | 1.03136 | 0.6281  | 1.02618 | 0.62884 | 1.01569 |
| 1.02046 | 0.64554 | 1.03664 | 0.64491 | 1.0362  | 0.645   | 1.00818 |
| 1.01428 | 0.66304 | 1.02469 | 0.66255 | 1.02193 | 0.66254 | 1.02019 |
| 1.01815 | 0.681   | 1.02015 | 0.68024 | 1.01862 | 0.68086 | 1.02891 |
| 1.03213 | 0.6987  | 1.0314  | 0.69767 | 1.03535 | 0.69866 | 1.02112 |
| 1.02415 | 0.71539 | 1.02171 | 0.71479 | 1.03493 | 0.71513 | 1.0209  |
| 1.02319 | 0.73181 | 1.02143 | 0.73105 | 1.01969 | 0.73158 | 1.01757 |
| 1.03193 | 0.74839 | 1.0385  | 0.74754 | 1.01837 | 0.74801 | 1.00662 |
| 1.03904 | 0.7661  | 1.01986 | 0.76521 | 1.02465 | 0.76553 | 1.01515 |
| 1.02857 | 0.78358 | 0.99712 | 0.78283 | 1.02318 | 0.78286 | 1.02146 |
| 1.01845 | 0.8006  | 1.01034 | 0.79992 | 1.02503 | 0.80001 | 1.02142 |
| 1.02043 | 0.81812 | 1.02734 | 0.81728 | 1.02117 | 0.81752 | 1.02418 |
| 1.02571 | 0.83516 | 1.03283 | 0.83469 | 1.03216 | 0.83498 | 1.01719 |
| 1.02169 | 0.85232 | 1.02692 | 0.8516  | 1.04179 | 0.8521  | 1.02284 |
| 1.01829 | 0.86961 | 1.01682 | 0.86877 | 1.0247  | 0.86922 | 1.03895 |
| 1.02818 | 0.88633 | 1.01985 | 0.88549 | 1.01933 | 0.88581 | 1.04078 |
| 1.03083 | 0.90282 | 1.03269 | 0.90214 | 1.03492 | 0.90266 | 1.03675 |
| 1.0396  | 0.92068 | 1.03859 | 0.9197  | 1.04025 | 0.92018 | 1.0462  |
| 1.04795 | 0.93839 | 1.0399  | 0.93738 | 1.02796 | 0.9378  | 1.04766 |
| 1.03143 | 0.95517 | 1.0325  | 0.95441 | 1.01922 | 0.9547  | 1.03634 |
| 1.02631 | 0.97201 | 1.01736 | 0.9712  | 1.0159  | 0.97155 | 1.03689 |
| 1.0329  | 0.98917 | 1.0187  | 0.98832 | 1.02858 | 0.98859 | 1.02875 |

|         |         |         |         |         |         |         |
|---------|---------|---------|---------|---------|---------|---------|
| 1.03037 | 1.00629 | 1.03204 | 1.00539 | 1.04579 | 1.00555 | 1.01097 |
| 1.03094 | 1.02369 | 1.03806 | 1.02273 | 1.04283 | 1.02292 | 1.01922 |
| 1.03269 | 1.04082 | 1.04189 | 1.03989 | 1.03581 | 1.0404  | 1.05447 |
| 1.02669 | 1.05824 | 1.03771 | 1.05738 | 1.03737 | 1.05727 | 1.06962 |
| 1.01652 | 1.07548 | 1.03977 | 1.07476 | 1.03107 | 1.07469 | 1.04546 |
| 1.01998 | 1.09223 | 1.0397  | 1.09176 | 1.02741 | 1.09171 | 1.02351 |
| 1.03026 | 1.10948 | 1.03013 | 1.10873 | 1.02999 | 1.10897 | 1.03774 |
| 1.03637 | 1.12733 | 1.03439 | 1.12621 | 1.03563 | 1.12658 | 1.04228 |
| 1.0378  | 1.14482 | 1.03299 | 1.14379 | 1.03437 | 1.14394 | 1.03253 |
| 1.02818 | 1.16256 | 1.02946 | 1.16134 | 1.03416 | 1.16156 | 1.04475 |
| 1.0324  | 1.18012 | 1.03682 | 1.17897 | 1.04024 | 1.17955 | 1.05178 |
| 1.04527 | 1.19771 | 1.03064 | 1.19651 | 1.03087 | 1.19743 | 1.03427 |
| 1.043   | 1.21429 | 1.04554 | 1.2135  | 1.02766 | 1.21345 | 1.02177 |
| 1.03492 | 1.23071 | 1.04403 | 1.22987 | 1.02175 | 1.22962 | 1.02229 |
| 1.03394 | 1.24786 | 1.0303  | 1.24685 | 1.03353 | 1.24688 | 1.03282 |
| 1.04839 | 1.26533 | 1.04019 | 1.26423 | 1.04402 | 1.26453 | 1.04098 |
| 1.05466 | 1.28273 | 1.02908 | 1.28196 | 1.02514 | 1.28204 | 1.05148 |
| 1.04228 | 1.30041 | 1.02243 | 1.29947 | 1.03421 | 1.29984 | 1.05786 |
| 1.04057 | 1.3162  | 1.01857 | 1.31593 | 1.03532 | 1.31596 | 1.04257 |
| 1.03291 | 1.33256 | 1.02495 | 1.33194 | 1.01997 | 1.33178 | 1.03167 |
| 1.02428 | 1.34903 | 1.03376 | 1.34816 | 1.02239 | 1.34797 | 1.03769 |
| 1.01941 | 1.36539 | 1.03737 | 1.36424 | 1.00781 | 1.36437 | 1.05884 |
| 1.02226 | 1.38161 | 1.03775 | 1.38037 | 1.0044  | 1.38038 | 1.03636 |
| 1.03086 | 1.39896 | 1.02987 | 1.39718 | 1.02132 | 1.39736 | 1.02133 |
| 1.03733 | 1.41825 | 1.03292 | 1.41675 | 1.02942 | 1.4167  | 1.04722 |
| 1.03566 | 1.43687 | 1.03467 | 1.43598 | 1.02046 | 1.4358  | 1.05115 |
| 1.0315  | 1.45412 | 1.02941 | 1.45309 | 1.00796 | 1.45298 | 1.03539 |
| 1.039   | 1.47109 | 1.0298  | 1.47009 | 1.00767 | 1.47026 | 1.0379  |
| 1.03272 | 1.48828 | 1.02818 | 1.48718 | 1.02215 | 1.48766 | 1.04195 |
| 1.03802 | 1.50568 | 1.03714 | 1.50444 | 1.0236  | 1.50511 | 1.05263 |
| 1.03371 | 1.52323 | 1.04173 | 1.52216 | 1.01258 | 1.52263 | 1.05275 |
| 1.04322 | 1.54163 | 1.03552 | 1.5407  | 1.02565 | 1.54073 | 1.04464 |
| 1.05078 | 1.56021 | 1.03734 | 1.55914 | 1.05244 | 1.55912 | 1.0493  |
| 1.04909 | 1.57885 | 1.02419 | 1.57774 | 1.0603  | 1.57793 | 1.06089 |
| 1.05362 | 1.59753 | 1.02229 | 1.59654 | 1.04603 | 1.59637 | 1.05836 |
| 1.03978 | 1.61094 | 1.02345 | 1.61023 | 1.04244 | 1.61001 | 1.04154 |
| 1.03059 | 1.62512 | 1.02581 | 1.62411 | 1.03189 | 1.62419 | 1.04643 |
| 1.03387 | 1.64308 | 1.03666 | 1.64207 | 1.02166 | 1.64179 | 1.04843 |
| 1.03599 | 1.66095 | 1.02456 | 1.66005 | 1.02972 | 1.65969 | 1.05674 |
| 1.0408  | 1.67913 | 1.01962 | 1.67812 | 1.03724 | 1.67772 | 1.05969 |
| 1.03824 | 1.69706 | 1.02776 | 1.69631 | 1.03635 | 1.69609 | 1.0561  |
| 1.02279 | 1.71298 | 1.03503 | 1.7127  | 1.03505 | 1.71271 | 1.06048 |
| 1.02266 | 1.72838 | 1.03267 | 1.72792 | 1.02956 | 1.72797 | 1.05657 |
| 1.01835 | 1.74488 | 1.0234  | 1.74379 | 1.02721 | 1.74373 | 1.05212 |
| 1.01449 | 1.76137 | 1.00522 | 1.76045 | 1.02668 | 1.76021 | 1.05225 |
| 1.02274 | 1.778   | 1.00308 | 1.77695 | 1.021   | 1.77725 | 1.05505 |
| 1.02964 | 1.79476 | 1.02172 | 1.79381 | 1.0163  | 1.79404 | 1.04938 |

|         |         |         |         |         |         |         |
|---------|---------|---------|---------|---------|---------|---------|
| 1.03717 | 1.81353 | 1.02444 | 1.81263 | 1.01883 | 1.81312 | 1.0347  |
| 1.04631 | 1.83238 | 1.01243 | 1.83152 | 1.02751 | 1.83174 | 1.04472 |
| 1.04131 | 1.85014 | 1.02219 | 1.84932 | 1.01855 | 1.84929 | 1.04988 |
| 1.05069 | 1.86774 | 1.04043 | 1.86688 | 1.01608 | 1.86669 | 1.04877 |
| 1.06048 | 1.88547 | 1.0379  | 1.88451 | 1.02798 | 1.88432 | 1.06183 |
| 1.04469 | 1.90172 | 1.02374 | 1.90102 | 1.02837 | 1.90148 | 1.049   |
| 1.04431 | 1.91774 | 1.00651 | 1.91666 | 1.02306 | 1.91669 | 1.03684 |
| 1.04174 | 1.93495 | 1.00315 | 1.93373 | 1.00651 | 1.93322 | 1.04787 |
| 1.033   | 1.95265 | 1.00293 | 1.9514  | 1.01406 | 1.95099 | 1.05541 |
| 1.02625 | 1.97021 | 1.00633 | 1.96924 | 1.03084 | 1.96893 | 1.03643 |
| 1.01595 | 1.98815 | 1.00994 | 1.98715 | 1.02757 | 1.98683 | 1.0408  |
| 1.01209 | 2.00235 | 1.00963 | 2.00179 | 1.01394 | 2.0019  | 1.04699 |
| 1.01128 | 2.00812 | 0.99696 | 2.00779 | 1.01176 | 2.00871 | 1.03007 |
| 1.00757 | 2.00976 | 0.99121 | 2.00927 | 1.01738 | 2.01032 | 1.02003 |
| 1.00573 | 2.01019 | 1.00417 | 2.00975 | 1.00758 | 2.01083 | 1.02251 |
| 1.00961 | 2.01032 | 0.99906 | 2.00992 | 1.00087 | 2.01099 | 1.03475 |
| 1.00859 | 2.01037 | 0.98281 | 2.00996 | 1.00586 | 2.01101 | 1.03643 |
| 1.00061 | 2.01038 | 0.97398 | 2.00998 | 1.01635 | 2.01098 | 1.02299 |
| 0.99674 | 2.01039 | 0.98052 | 2.01    | 1.01319 | 2.01104 | 1.0159  |

| moH     | T350K-PA | moH     | T400K-PA | moH     | T500K-PA | moH     |
|---------|----------|---------|----------|---------|----------|---------|
| 2.01678 | 1.00651  | 7.00015 | 1.00595  | 7.005   | 0.98565  | 7.00002 |
| 2.01232 | 0.99709  | 6.80017 | 1.01105  | 6.80501 | 1.0224   | 6.80004 |
| 1.99914 | 0.997    | 6.60016 | 1.00495  | 6.605   | 1.02204  | 6.60004 |
| 1.98217 | 0.99485  | 6.40017 | 1.00869  | 6.405   | 1.02957  | 6.40003 |
| 1.96486 | 1.00081  | 6.20016 | 1.00708  | 6.205   | 1.02228  | 6.20005 |
| 1.94758 | 0.99543  | 6.00018 | 1.01469  | 6.00499 | 1.02171  | 6.00002 |
| 1.93018 | 0.97975  | 5.80014 | 1.0222   | 5.80498 | 1.02482  | 5.80004 |
| 1.91497 | 0.99469  | 5.60016 | 1.00759  | 5.60498 | 1.02628  | 5.60004 |
| 1.89935 | 1.00985  | 5.40017 | 1.01452  | 5.40501 | 1.02283  | 5.40004 |
| 1.88196 | 1.0056   | 5.20015 | 1.01106  | 5.20501 | 1.02696  | 5.20004 |
| 1.86469 | 1.00024  | 5.00017 | 1.00283  | 5.00501 | 1.02671  | 5.00004 |
| 1.84728 | 1.01063  | 4.80016 | 0.99401  | 4.80501 | 1.0324   | 4.80004 |
| 1.82874 | 1.0123   | 4.60015 | 1.0114   | 4.60502 | 1.02716  | 4.60004 |
| 1.80976 | 0.99523  | 4.40015 | 1.00893  | 4.40501 | 1.02478  | 4.40005 |
| 1.79233 | 0.97867  | 4.20016 | 1.01008  | 4.20502 | 1.02961  | 4.20006 |
| 1.7755  | 0.98205  | 4.00015 | 1.01249  | 4.00501 | 1.03634  | 4.00005 |
| 1.75849 | 0.98785  | 3.80017 | 1.01127  | 3.80499 | 1.02304  | 3.80002 |
| 1.74208 | 0.99372  | 3.60017 | 1.00923  | 3.60502 | 1.02881  | 3.60005 |
| 1.7277  | 1.00138  | 3.40017 | 1.01042  | 3.405   | 1.02599  | 3.40004 |
| 1.71202 | 1.00081  | 3.20017 | 1.01127  | 3.20501 | 1.02558  | 3.20006 |
| 1.69358 | 0.99965  | 3.00017 | 1.01061  | 3.005   | 1.02799  | 3.00003 |
| 1.67542 | 0.99479  | 2.80016 | 1.01266  | 2.805   | 1.02595  | 2.80004 |
| 1.65723 | 0.99478  | 2.60016 | 1.00969  | 2.605   | 1.02898  | 2.60005 |
| 1.63926 | 1.00427  | 2.40015 | 1.00766  | 2.40502 | 1.02412  | 2.40004 |
| 1.62514 | 1.02187  | 2.20016 | 1.00734  | 2.20501 | 1.02469  | 2.20004 |
| 1.61098 | 1.01721  | 2.00016 | 1.00749  | 2.00501 | 1.01814  | 2.00004 |
| 1.59365 | 1.00682  | 1.80015 | 1.00734  | 1.80501 | 1.0213   | 1.80003 |
| 1.57525 | 1.0186   | 1.60017 | 1.00455  | 1.60501 | 1.01668  | 1.60004 |
| 1.55675 | 1.00821  | 1.40015 | 0.99999  | 1.40502 | 0.99521  | 1.40003 |
| 1.53789 | 0.9973   | 1.30015 | 0.99726  | 1.30501 | 0.99879  | 1.30003 |
| 1.52027 | 1.0051   | 1.20016 | 0.99637  | 1.205   | 1.008    | 1.20004 |
| 1.50327 | 0.99153  | 1.10018 | 0.99819  | 1.10502 | 1.00452  | 1.10004 |
| 1.48539 | 0.98919  | 1.00017 | 0.98566  | 1.00501 | 1.00433  | 1.00002 |
| 1.46812 | 0.98621  | 0.90014 | 0.97965  | 0.90499 | 0.98295  | 0.90003 |
| 1.45087 | 0.97876  | 0.80015 | 0.96963  | 0.80499 | 0.98734  | 0.80005 |
| 1.43253 | 0.98014  | 0.70016 | 0.95628  | 0.70498 | 0.97639  | 0.70005 |
| 1.41336 | 0.98802  | 0.60015 | 0.94291  | 0.60502 | 0.96271  | 0.60003 |
| 1.39541 | 0.99815  | 0.50016 | 0.91412  | 0.505   | 0.94262  | 0.50004 |
| 1.37871 | 1.00228  | 0.40015 | 0.87246  | 0.40499 | 0.90514  | 0.40002 |
| 1.36256 | 0.99339  | 0.30017 | 0.79765  | 0.30501 | 0.83754  | 0.30004 |
| 1.34653 | 0.97987  | 0.28017 | 0.76958  | 0.20502 | 0.70862  | 0.20005 |
| 1.33061 | 0.99903  | 0.26015 | 0.74824  | 0.18501 | 0.65436  | 0.18004 |
| 1.31498 | 1.01945  | 0.24016 | 0.72102  | 0.16499 | 0.62236  | 0.16002 |
| 1.29786 | 1.03006  | 0.22015 | 0.6856   | 0.14498 | 0.57769  | 0.14001 |
| 1.28019 | 1.02402  | 0.20016 | 0.65901  | 0.12499 | 0.52889  | 0.12005 |
| 1.26247 | 1.00298  | 0.18018 | 0.62623  | 0.10498 | 0.47614  | 0.10004 |



|         |         |          |          |          |          |          |
|---------|---------|----------|----------|----------|----------|----------|
| 1.24511 | 1.00266 | 0.16017  | 0.57532  | 0.08502  | 0.41642  | 0.08003  |
| 1.22891 | 1.00038 | 0.14013  | 0.53191  | 0.065    | 0.34804  | 0.06003  |
| 1.21234 | 0.98179 | 0.12017  | 0.49308  | 0.045    | 0.27637  | 0.04003  |
| 1.19489 | 1.00141 | 0.10017  | 0.43373  | 0.02503  | 0.20369  | 0.02005  |
| 1.17742 | 1.00743 | 0.08017  | 0.38377  | 0.00499  | 0.12128  | 2.33E-05 |
| 1.15989 | 0.9973  | 0.06014  | 0.32505  | -0.01501 | 0.03024  | -0.02    |
| 1.14192 | 1.00107 | 0.04017  | 0.24311  | -0.03502 | -0.06125 | -0.03996 |
| 1.12402 | 0.99182 | 0.02016  | 0.19961  | -0.05502 | -0.16357 | -0.05997 |
| 1.10674 | 0.98595 | 1.55E-04 | 0.1133   | -0.07504 | -0.2532  | -0.07998 |
| 1.08981 | 0.98946 | -0.01987 | 0.03002  | -0.09499 | -0.3262  | -0.09995 |
| 1.07249 | 1.00246 | -0.03984 | -0.05476 | -0.11502 | -0.40097 | -0.11996 |
| 1.0552  | 0.99504 | -0.05985 | -0.14073 | -0.13502 | -0.45639 | -0.13996 |
| 1.03806 | 0.98017 | -0.07986 | -0.224   | -0.155   | -0.51713 | -0.15997 |
| 1.02026 | 0.98135 | -0.09985 | -0.29316 | -0.175   | -0.56831 | -0.17997 |
| 1.00301 | 0.99645 | -0.11986 | -0.35693 | -0.19507 | -0.61401 | -0.19998 |
| 0.98608 | 0.99381 | -0.13985 | -0.41691 | -0.295   | -0.77841 | -0.29998 |
| 0.96947 | 0.9872  | -0.15982 | -0.4711  | -0.395   | -0.86666 | -0.39996 |
| 0.9528  | 0.99757 | -0.17985 | -0.52184 | -0.495   | -0.89918 | -0.49996 |
| 0.93553 | 0.99992 | -0.19989 | -0.57155 | -0.59504 | -0.92894 | -0.59994 |
| 0.91766 | 0.99823 | -0.21986 | -0.61577 | -0.695   | -0.94111 | -0.69997 |
| 0.90067 | 0.99759 | -0.23987 | -0.65731 | -0.795   | -0.95146 | -0.79996 |
| 0.88371 | 0.99787 | -0.25988 | -0.69548 | -0.89498 | -0.96531 | -0.89997 |
| 0.86663 | 0.99998 | -0.27984 | -0.72917 | -0.99501 | -0.9653  | -0.99998 |
| 0.8498  | 0.99528 | -0.29985 | -0.76073 | -1.09499 | -0.96845 | -1.09995 |
| 0.83259 | 0.98934 | -0.39983 | -0.85202 | -1.19498 | -0.97047 | -1.19995 |
| 0.81514 | 0.99688 | -0.49985 | -0.9022  | -1.29498 | -0.97379 | -1.29997 |
| 0.7979  | 0.99729 | -0.59982 | -0.93146 | -1.39498 | -0.9761  | -1.39996 |
| 0.78025 | 0.96941 | -0.69985 | -0.95125 | -1.59498 | -0.97658 | -1.59997 |
| 0.7629  | 0.978   | -0.79984 | -0.9656  | -1.795   | -0.97918 | -1.79996 |
| 0.74601 | 0.99027 | -0.89986 | -0.9747  | -1.995   | -0.97986 | -1.99994 |
| 0.72942 | 0.98128 | -0.99986 | -0.98192 | -2.195   | -0.98294 | -2.19995 |
| 0.71304 | 0.97877 | -1.09984 | -0.98566 | -2.395   | -0.98311 | -2.39996 |
| 0.69589 | 0.97698 | -1.19983 | -0.99091 | -2.595   | -0.98295 | -2.59995 |
| 0.67757 | 0.98091 | -1.29982 | -0.99347 | -2.79498 | -0.9858  | -2.79996 |
| 0.65976 | 0.98642 | -1.39983 | -0.99423 | -2.995   | -0.98365 | -2.99995 |
| 0.6426  | 0.98255 | -1.59985 | -0.99719 | -3.195   | -0.98575 | -3.19996 |
| 0.62669 | 0.98446 | -1.79985 | -0.99887 | -3.39498 | -0.98466 | -3.39996 |
| 0.61031 | 0.99774 | -1.99986 | -1.00084 | -3.59498 | -0.98439 | -3.59998 |
| 0.59286 | 0.98524 | -2.19983 | -1.00132 | -3.795   | -0.98486 | -3.79996 |
| 0.5759  | 0.98034 | -2.39984 | -1.00317 | -3.99499 | -0.98404 | -3.99996 |
| 0.55843 | 0.98432 | -2.59983 | -1.00342 | -4.19498 | -0.98344 | -4.19995 |
| 0.54095 | 0.96933 | -2.79984 | -1.00172 | -4.39499 | -0.98111 | -4.39996 |
| 0.5248  | 0.96146 | -2.99984 | -1.00512 | -4.59499 | -0.98375 | -4.59998 |
| 0.50757 | 0.97116 | -3.19983 | -1.00498 | -4.79499 | -0.97999 | -4.79994 |
| 0.48955 | 0.9676  | -3.39983 | -1.00366 | -4.99499 | -0.98423 | -4.99995 |
| 0.47093 | 0.9566  | -3.59985 | -1.00347 | -5.19499 | -0.98221 | -5.19997 |
| 0.45294 | 0.94736 | -3.79983 | -1.00319 | -5.395   | -0.98395 | -5.39994 |

|          |          |          |          |          |          |          |
|----------|----------|----------|----------|----------|----------|----------|
| 0.43615  | 0.95071  | -3.99984 | -1.00436 | -5.59501 | -0.97979 | -5.59995 |
| 0.41937  | 0.96186  | -4.19983 | -1.00447 | -5.795   | -0.97807 | -5.79997 |
| 0.40254  | 0.94424  | -4.39983 | -1.0022  | -5.99499 | -0.98788 | -5.99997 |
| 0.38564  | 0.92423  | -4.59985 | -1.00342 | -6.195   | -0.97722 | -6.19996 |
| 0.36863  | 0.92407  | -4.79983 | -1.00144 | -6.39499 | -0.98084 | -6.39995 |
| 0.35133  | 0.92634  | -4.99984 | -1.00041 | -6.59498 | -0.97653 | -6.59994 |
| 0.33364  | 0.91948  | -5.19985 | -1.00016 | -6.795   | -0.98058 | -6.79997 |
| 0.31565  | 0.90254  | -5.39982 | -0.99914 | -6.99498 | -0.97868 | -6.99998 |
| 0.2982   | 0.89664  | -5.59985 | -0.99838 | -6.99501 | -0.98011 | -6.99997 |
| 0.28096  | 0.89499  | -5.79986 | -1.00014 | -6.79499 | -0.98082 | -6.79995 |
| 0.26425  | 0.87747  | -5.99983 | -1.00033 | -6.59501 | -0.97998 | -6.59995 |
| 0.24693  | 0.87521  | -6.19984 | -0.99763 | -6.395   | -0.97871 | -6.39996 |
| 0.22894  | 0.86743  | -6.39984 | -0.99576 | -6.195   | -0.98176 | -6.19997 |
| 0.21122  | 0.8545   | -6.59984 | -0.99922 | -5.995   | -0.983   | -5.99994 |
| 0.19349  | 0.8237   | -6.79983 | -0.9995  | -5.79498 | -0.97124 | -5.79995 |
| 0.17572  | 0.77979  | -6.99985 | -1.00393 | -5.595   | -0.9833  | -5.59994 |
| 0.15877  | 0.77727  | -6.99985 | -0.997   | -5.39498 | -0.97115 | -5.39995 |
| 0.14188  | 0.75939  | -6.79983 | -1.00332 | -5.19498 | -0.98556 | -5.19996 |
| 0.12403  | 0.73481  | -6.59984 | -0.99908 | -4.99497 | -0.98501 | -4.99997 |
| 0.10615  | 0.71141  | -6.39983 | -1.00748 | -4.795   | -0.97841 | -4.79996 |
| 0.08787  | 0.65287  | -6.19982 | -1.00415 | -4.59499 | -0.987   | -4.59995 |
| 0.07012  | 0.61421  | -5.99983 | -1.00086 | -4.39499 | -0.98596 | -4.39996 |
| 0.05315  | 0.56474  | -5.79983 | -1.00452 | -4.19499 | -0.99025 | -4.19996 |
| 0.03669  | 0.472    | -5.59984 | -1.00116 | -3.99498 | -0.98073 | -3.99995 |
| 0.01784  | 0.38154  | -5.39984 | -1.0044  | -3.79498 | -0.96    | -3.79995 |
| -0.00202 | 0.28978  | -5.19983 | -1.00355 | -3.595   | -0.98543 | -3.59994 |
| -0.02006 | 0.19828  | -4.99984 | -1.00469 | -3.395   | -0.99477 | -3.39994 |
| -0.03903 | 0.0896   | -4.79984 | -1.0145  | -3.19499 | -0.98679 | -3.19995 |
| -0.05846 | -0.03975 | -4.59984 | -1.003   | -2.99501 | -0.98773 | -2.99998 |
| -0.07409 | -0.14735 | -4.39986 | -1.00671 | -2.79498 | -0.98489 | -2.79995 |
| -0.08842 | -0.23701 | -4.19984 | -1.00315 | -2.59501 | -0.98749 | -2.59998 |
| -0.10403 | -0.32527 | -3.99984 | -1.00225 | -2.39498 | -0.98325 | -2.39995 |
| -0.12031 | -0.42115 | -3.79985 | -1.00599 | -2.19502 | -0.97427 | -2.19999 |
| -0.13757 | -0.50079 | -3.59986 | -1.00672 | -1.99501 | -0.97476 | -1.99997 |
| -0.15452 | -0.57914 | -3.39983 | -1.00442 | -1.79502 | -0.99582 | -1.79998 |
| -0.17145 | -0.65158 | -3.19982 | -1.00448 | -1.59502 | -0.96787 | -1.59999 |
| -0.18873 | -0.71767 | -2.99985 | -1.00555 | -1.39507 | -0.97098 | -1.40003 |
| -0.20557 | -0.78154 | -2.79989 | -0.99955 | -1.29503 | -0.96134 | -1.3     |
| -0.22248 | -0.81961 | -2.5999  | -0.99011 | -1.19501 | -0.96829 | -1.19998 |
| -0.24033 | -0.82353 | -2.39988 | -1.0041  | -1.09503 | -0.96244 | -1.1     |
| -0.25769 | -0.83536 | -2.19991 | -0.99031 | -0.99505 | -0.95857 | -1.00002 |
| -0.27514 | -0.8595  | -1.9999  | -0.99984 | -0.89501 | -0.95764 | -0.89998 |
| -0.29274 | -0.8569  | -1.79991 | -1.00152 | -0.79503 | -0.93793 | -0.8     |
| -0.30932 | -0.86422 | -1.59991 | -0.99573 | -0.69507 | -0.93446 | -0.70003 |
| -0.32633 | -0.88236 | -1.39989 | -0.99453 | -0.59506 | -0.9188  | -0.60003 |
| -0.34342 | -0.88085 | -1.2999  | -0.98905 | -0.49502 | -0.89663 | -0.5     |
| -0.36055 | -0.88024 | -1.19986 | -0.98619 | -0.39504 | -0.83773 | -0.39999 |

|          |          |          |          |          |          |           |
|----------|----------|----------|----------|----------|----------|-----------|
| -0.37768 | -0.90399 | -1.09988 | -0.98576 | -0.29505 | -0.79235 | -0.30002  |
| -0.39463 | -0.92601 | -0.99989 | -0.98682 | -0.19506 | -0.68334 | -0.20004  |
| -0.41203 | -0.91722 | -0.89986 | -0.97532 | -0.17506 | -0.62292 | -0.18003  |
| -0.42934 | -0.90929 | -0.79989 | -0.95919 | -0.15505 | -0.58596 | -0.16002  |
| -0.44635 | -0.91673 | -0.69991 | -0.95493 | -0.13502 | -0.53906 | -0.13999  |
| -0.46371 | -0.9343  | -0.59991 | -0.92851 | -0.11507 | -0.4893  | -0.12004  |
| -0.48062 | -0.94592 | -0.49988 | -0.90822 | -0.09505 | -0.43535 | -0.10003  |
| -0.49735 | -0.92861 | -0.39991 | -0.86494 | -0.07505 | -0.37643 | -0.08002  |
| -0.51542 | -0.93028 | -0.29991 | -0.79367 | -0.05506 | -0.32395 | -0.06001  |
| -0.53325 | -0.94756 | -0.27991 | -0.76316 | -0.03504 | -0.24691 | -0.04003  |
| -0.55006 | -0.95231 | -0.25992 | -0.74278 | -0.01506 | -0.17233 | -0.02004  |
| -0.5674  | -0.95773 | -0.2399  | -0.71065 | 0.00494  | -0.08546 | -2.29E-05 |
| -0.58514 | -0.9495  | -0.21992 | -0.68908 | 0.02496  | 0.01716  | 0.02001   |
| -0.60192 | -0.95175 | -0.19989 | -0.65568 | 0.04497  | 0.09987  | 0.03997   |
| -0.61763 | -0.95197 | -0.17991 | -0.61873 | 0.06492  | 0.19706  | 0.05999   |
| -0.6337  | -0.95272 | -0.1599  | -0.57407 | 0.08497  | 0.2802   | 0.08001   |
| -0.65074 | -0.96239 | -0.13988 | -0.53842 | 0.10494  | 0.3623   | 0.09997   |
| -0.66816 | -0.96132 | -0.11992 | -0.48922 | 0.12494  | 0.42214  | 0.11998   |
| -0.68556 | -0.95923 | -0.0999  | -0.45985 | 0.14496  | 0.48994  | 0.13998   |
| -0.70321 | -0.96087 | -0.07989 | -0.37754 | 0.16493  | 0.54723  | 0.15997   |
| -0.72081 | -0.96248 | -0.0599  | -0.32114 | 0.18495  | 0.59905  | 0.17999   |
| -0.73818 | -0.96029 | -0.03991 | -0.2574  | 0.205    | 0.65018  | 0.20004   |
| -0.75441 | -0.96496 | -0.01992 | -0.19109 | 0.30501  | 0.8109   | 0.30004   |
| -0.77116 | -0.96467 | 7.99E-05 | -0.1091  | 0.40496  | 0.89621  | 0.39999   |
| -0.78865 | -0.94956 | 0.02011  | -0.02452 | 0.50499  | 0.93391  | 0.50003   |
| -0.80573 | -0.95126 | 0.04012  | 0.04727  | 0.60501  | 0.95649  | 0.60003   |
| -0.82247 | -0.96864 | 0.06012  | 0.14465  | 0.70499  | 0.96898  | 0.70005   |
| -0.84003 | -0.97473 | 0.08009  | 0.22726  | 0.80497  | 0.97595  | 0.80002   |
| -0.85697 | -0.97687 | 0.10012  | 0.29957  | 0.90499  | 0.98935  | 0.89997   |
| -0.87428 | -0.99263 | 0.12013  | 0.35858  | 1.00499  | 0.99388  | 1.00004   |
| -0.8914  | -1.00244 | 0.14008  | 0.41742  | 1.10499  | 0.99803  | 1.10002   |
| -0.9078  | -0.98453 | 0.1601   | 0.47202  | 1.205    | 1.00199  | 1.20003   |
| -0.92457 | -0.98191 |          |          | 1.30498  | 1.00296  | 1.30004   |
| -0.94206 | -0.98473 |          |          | 1.40501  | 1.00657  | 1.40004   |
| -0.96007 | -0.98205 |          |          | 1.60498  | 1.00756  | 1.60002   |
| -0.9785  | -0.99698 |          |          | 1.80502  | 1.00997  | 1.80004   |
| -0.99599 | -0.99647 |          |          | 2.00499  | 1.01126  | 2.00002   |
| -1.01172 | -0.98898 |          |          | 2.20502  | 1.01462  | 2.20005   |
| -1.02779 | -0.98748 |          |          | 2.40502  | 1.01349  | 2.40005   |
| -1.04462 | -0.94578 |          |          | 2.605    | 1.01468  | 2.60004   |
| -1.06152 | -0.9367  |          |          | 2.805    | 1.01689  | 2.80004   |
| -1.07844 | -0.96524 |          |          | 3.00501  | 1.01574  | 3.00004   |
| -1.09573 | -0.96918 |          |          | 3.20502  | 1.01333  | 3.20005   |
| -1.1138  | -0.98806 |          |          | 3.405    | 1.01619  | 3.40004   |
| -1.13158 | -0.97923 |          |          | 3.605    | 1.01547  | 3.60003   |
| -1.14885 | -0.96776 |          |          | 3.805    | 1.01629  | 3.80005   |
| -1.16629 | -0.99562 |          |          | 4.00501  | 1.01469  | 4.00004   |

|          |          |         |         |         |
|----------|----------|---------|---------|---------|
| -1.18371 | -1.01219 | 4.205   | 1.01563 | 4.20003 |
| -1.20016 | -0.99987 | 4.40503 | 1.01568 | 4.40004 |
| -1.21643 | -0.97951 | 4.60502 | 1.01966 | 4.60004 |
| -1.23337 | -0.97339 | 4.80502 | 1.01321 | 4.80005 |
| -1.25041 | -0.97888 | 5.005   | 1.011   | 5.00004 |
| -1.26784 | -0.9779  | 5.205   | 1.0112  | 5.20003 |
| -1.28521 | -0.97048 | 5.405   | 1.01397 | 5.40004 |
| -1.30318 | -0.97465 | 5.605   | 1.01187 | 5.60004 |
| -1.3211  | -0.99358 | 5.80501 | 1.01124 | 5.80005 |
| -1.33899 | -0.99343 | 6.00501 | 1.01253 | 6.00005 |
| -1.35705 | -0.99724 | 6.20501 | 1.01011 | 6.20005 |
| -1.37527 | -1.00603 | 6.40499 | 1.00735 | 6.40005 |
| -1.39268 | -1.00475 | 6.605   | 1.01035 | 6.60005 |
| -1.40731 | -1.01248 | 6.80502 | 1.00743 | 6.80004 |
| -1.42241 | -0.99763 | 7.00502 | 1.00566 | 7.00006 |
| -1.43982 | -0.98455 |         |         |         |
| -1.45693 | -0.98859 |         |         |         |
| -1.47434 | -1.00737 |         |         |         |
| -1.4914  | -1.01114 |         |         |         |
| -1.50875 | -1.00934 |         |         |         |
| -1.52608 | -1.00179 |         |         |         |
| -1.54374 | -0.98824 |         |         |         |
| -1.56138 | -0.99536 |         |         |         |
| -1.57908 | -0.98036 |         |         |         |
| -1.59512 | -0.97663 |         |         |         |
| -1.61088 | -1.0067  |         |         |         |
| -1.62727 | -1.00477 |         |         |         |
| -1.64412 | -0.99649 |         |         |         |
| -1.66052 | -0.99574 |         |         |         |
| -1.67715 | -0.99576 |         |         |         |
| -1.69585 | -1.00852 |         |         |         |
| -1.71426 | -0.99322 |         |         |         |
| -1.73115 | -0.98287 |         |         |         |
| -1.7476  | -0.99235 |         |         |         |
| -1.76426 | -0.99663 |         |         |         |
| -1.78072 | -1.00053 |         |         |         |
| -1.79908 | -1.00448 |         |         |         |
| -1.81764 | -1.00909 |         |         |         |
| -1.83551 | -1.0117  |         |         |         |
| -1.85308 | -1.01659 |         |         |         |
| -1.87018 | -1.02105 |         |         |         |
| -1.88763 | -1.00184 |         |         |         |
| -1.9042  | -0.99243 |         |         |         |
| -1.92108 | -1.01392 |         |         |         |
| -1.93847 | -1.01558 |         |         |         |
| -1.95607 | -1.0043  |         |         |         |
| -1.97356 | -0.99459 |         |         |         |

|          |          |
|----------|----------|
| -1.98758 | -1.00154 |
| -1.99545 | -1.01032 |
| -1.99766 | -1.00599 |
| -1.99844 | -1.00651 |
| -1.99864 | -1.01223 |
| -1.99866 | -1.01086 |
| -1.99868 | -1.00174 |
| -1.99871 | -0.99855 |
| -1.99873 | -0.99828 |
| -1.99875 | -0.99608 |
| -1.99716 | -0.99424 |
| -1.9883  | -0.98704 |
| -1.97268 | -0.98515 |
| -1.95596 | -0.99295 |
| -1.93922 | -0.98638 |
| -1.92232 | -0.968   |
| -1.9056  | -0.97062 |
| -1.88867 | -0.98651 |
| -1.87189 | -0.98953 |
| -1.85462 | -0.98933 |
| -1.83694 | -0.99391 |
| -1.81979 | -0.98444 |
| -1.8009  | -0.97402 |
| -1.78283 | -0.96379 |
| -1.76605 | -0.95731 |
| -1.74948 | -0.97205 |
| -1.73258 | -0.97566 |
| -1.7158  | -0.96807 |
| -1.69737 | -0.95987 |
| -1.67909 | -0.96348 |
| -1.6626  | -0.97055 |
| -1.64624 | -0.96448 |
| -1.62945 | -0.9509  |
| -1.61239 | -0.96475 |
| -1.59688 | -0.97565 |
| -1.58111 | -0.96601 |
| -1.56353 | -0.96931 |
| -1.54561 | -0.96667 |
| -1.52786 | -0.98357 |
| -1.51045 | -0.98716 |
| -1.49344 | -0.97378 |
| -1.47609 | -0.97253 |
| -1.4588  | -0.95394 |
| -1.44141 | -0.95088 |
| -1.42404 | -0.97449 |
| -1.40874 | -0.99193 |
| -1.39389 | -0.97421 |

|          |          |
|----------|----------|
| -1.3768  | -0.96866 |
| -1.35867 | -0.97426 |
| -1.34087 | -0.96414 |
| -1.32299 | -0.95287 |
| -1.30494 | -0.9638  |
| -1.28734 | -0.97711 |
| -1.26984 | -0.98072 |
| -1.25257 | -0.97807 |
| -1.23513 | -0.97254 |
| -1.21785 | -0.96992 |
| -1.20206 | -0.96056 |
| -1.18551 | -0.96147 |
| -1.16802 | -0.96642 |
| -1.15029 | -0.9737  |
| -1.13294 | -0.97704 |
| -1.11554 | -0.96577 |
| -1.09746 | -0.96827 |
| -1.07953 | -0.9783  |
| -1.06255 | -0.96325 |
| -1.04573 | -0.93618 |
| -1.02894 | -0.91714 |
| -1.01278 | -0.93143 |
| -0.99686 | -0.9652  |
| -0.97998 | -0.96992 |
| -0.96158 | -0.95144 |
| -0.94314 | -0.93362 |
| -0.92589 | -0.94415 |
| -0.90944 | -0.95122 |
| -0.89295 | -0.9406  |
| -0.8756  | -0.9417  |
| -0.85854 | -0.95807 |
| -0.8414  | -0.95736 |
| -0.82373 | -0.94122 |
| -0.80694 | -0.95009 |
| -0.79    | -0.95103 |
| -0.77265 | -0.92779 |
| -0.75598 | -0.93398 |
| -0.73916 | -0.94357 |
| -0.72227 | -0.94488 |
| -0.70425 | -0.94355 |
| -0.68647 | -0.92562 |
| -0.66956 | -0.93636 |
| -0.65215 | -0.93978 |
| -0.63493 | -0.93571 |
| -0.61865 | -0.92949 |
| -0.60298 | -0.92378 |
| -0.58602 | -0.91976 |

|           |          |
|-----------|----------|
| -0.56843  | -0.92168 |
| -0.55105  | -0.93219 |
| -0.53393  | -0.92922 |
| -0.51616  | -0.92565 |
| -0.49838  | -0.92128 |
| -0.48173  | -0.91521 |
| -0.46456  | -0.90522 |
| -0.44738  | -0.90321 |
| -0.43073  | -0.90012 |
| -0.41324  | -0.90161 |
| -0.39545  | -0.91067 |
| -0.37806  | -0.89888 |
| -0.36089  | -0.88517 |
| -0.34377  | -0.87897 |
| -0.32691  | -0.85963 |
| -0.31025  | -0.8602  |
| -0.29293  | -0.8665  |
| -0.27562  | -0.84094 |
| -0.25821  | -0.82982 |
| -0.2407   | -0.82441 |
| -0.22323  | -0.80623 |
| -0.20627  | -0.80159 |
| -0.18935  | -0.78723 |
| -0.17193  | -0.7593  |
| -0.15396  | -0.7415  |
| -0.13707  | -0.71622 |
| -0.12022  | -0.70389 |
| -0.1038   | -0.68086 |
| -0.0876   | -0.6397  |
| -0.0709   | -0.60365 |
| -0.05488  | -0.54929 |
| -0.03662  | -0.48963 |
| -0.0177   | -0.40013 |
| -4.76E-04 | -0.29074 |
| 0.01757   | -0.18931 |
| 0.03698   | -0.08801 |
| 0.05464   | 0.01225  |
| 0.07162   | 0.12619  |
| 0.08874   | 0.24101  |
| 0.10661   | 0.33841  |
| 0.1243    | 0.44003  |
| 0.14181   | 0.52901  |
| 0.15855   | 0.59168  |
| 0.17529   | 0.66832  |
| 0.1927    | 0.74238  |
| 0.21012   | 0.80688  |
| 0.2281    | 0.84624  |

|         |         |
|---------|---------|
| 0.24642 | 0.87095 |
| 0.26362 | 0.90149 |
| 0.28046 | 0.91707 |
| 0.29748 | 0.9311  |
| 0.31498 | 0.94075 |
| 0.33259 | 0.94136 |
| 0.35017 | 0.95553 |
| 0.36721 | 0.9916  |
| 0.38377 | 1.00444 |
| 0.3994  | 0.98167 |
| 0.41731 | 0.98156 |
| 0.435   | 0.99435 |
| 0.45193 | 0.99152 |
| 0.46991 | 1.00478 |
| 0.48834 | 1.00984 |
| 0.50657 | 1.00327 |
| 0.52321 | 1.01157 |
| 0.54    | 1.01145 |
| 0.55739 | 1.01015 |
| 0.57425 | 1.0292  |
| 0.59135 | 1.03522 |
| 0.60904 | 1.03806 |
| 0.62526 | 1.03034 |
| 0.64125 | 1.02235 |
| 0.6581  | 1.03435 |
| 0.67632 | 1.02757 |
| 0.69433 | 1.03494 |
| 0.71154 | 1.04194 |
| 0.72849 | 1.04277 |
| 0.74489 | 1.04975 |
| 0.7614  | 1.04186 |
| 0.77879 | 1.04756 |
| 0.7963  | 1.06052 |
| 0.81319 | 1.04891 |
| 0.83085 | 1.05706 |
| 0.84818 | 1.06483 |
| 0.86464 | 1.05415 |
| 0.88174 | 1.05173 |
| 0.89908 | 1.05944 |
| 0.91612 | 1.06591 |
| 0.93361 | 1.06114 |
| 0.9513  | 1.05932 |
| 0.96795 | 1.05961 |
| 0.98445 | 1.0481  |
| 1.0016  | 1.04531 |
| 1.01877 | 1.04855 |
| 1.03646 | 1.04991 |



|         |         |
|---------|---------|
| 1.05359 | 1.07072 |
| 1.07079 | 1.07589 |
| 1.08796 | 1.06733 |
| 1.1048  | 1.07495 |
| 1.12241 | 1.08196 |
| 1.14001 | 1.08043 |
| 1.15767 | 1.08342 |
| 1.17529 | 1.08334 |
| 1.19303 | 1.07448 |
| 1.21055 | 1.07985 |
| 1.22649 | 1.08599 |
| 1.24281 | 1.0779  |
| 1.26031 | 1.07354 |
| 1.27768 | 1.06893 |
| 1.29541 | 1.06735 |
| 1.31318 | 1.09564 |
| 1.32919 | 1.10995 |
| 1.3445  | 1.09397 |
| 1.36057 | 1.08687 |
| 1.37694 | 1.07568 |
| 1.39391 | 1.06803 |
| 1.41104 | 1.07832 |
| 1.43    | 1.08807 |
| 1.4491  | 1.0962  |
| 1.46617 | 1.09641 |
| 1.48349 | 1.08539 |
| 1.50092 | 1.08937 |
| 1.51793 | 1.09617 |
| 1.53598 | 1.093   |
| 1.55437 | 1.10973 |
| 1.57309 | 1.12546 |
| 1.59179 | 1.12311 |
| 1.60982 | 1.13313 |
| 1.62303 | 1.12273 |
| 1.63699 | 1.10761 |
| 1.65483 | 1.11128 |
| 1.67302 | 1.11006 |
| 1.6912  | 1.11003 |
| 1.70942 | 1.12102 |
| 1.7249  | 1.10833 |
| 1.74019 | 1.09934 |
| 1.75633 | 1.09197 |
| 1.77304 | 1.08426 |
| 1.79016 | 1.09268 |
| 1.80696 | 1.08987 |
| 1.82586 | 1.10014 |
| 1.84517 | 1.1191  |

|         |         |
|---------|---------|
| 1.86261 | 1.12172 |
| 1.88011 | 1.12525 |
| 1.89758 | 1.13736 |
| 1.91273 | 1.13467 |
| 1.92842 | 1.12825 |
| 1.94645 | 1.1386  |
| 1.96452 | 1.12939 |
| 1.98227 | 1.10912 |
| 1.99981 | 1.11388 |
| 2.01147 | 1.1307  |
| 2.01558 | 1.12047 |
| 2.0165  | 1.10386 |
| 2.01672 | 1.09722 |
| 2.01685 | 1.09371 |
| 2.01691 | 1.09816 |
| 2.0169  | 1.11131 |
| 2.01691 | 1.11408 |
| 2.01692 | 1.1002  |
| 2.0159  | 1.11297 |

--

| T550K-PA | moH     | T600K-PA | moH     | T650K-PA | moH     | T700K-PA |
|----------|---------|----------|---------|----------|---------|----------|
| 0.99049  | 7.00081 | 1.0205   | 6.99978 | 1.03616  | 6.99823 | 1.02672  |
| 0.99306  | 6.80081 | 1.02645  | 6.79979 | 1.03747  | 6.79825 | 1.04034  |
| 0.99584  | 6.6008  | 1.02693  | 6.59978 | 1.0364   | 6.59825 | 1.03889  |
| 0.99694  | 6.40081 | 1.02404  | 6.39977 | 1.0363   | 6.39825 | 1.05658  |
| 0.99685  | 6.20083 | 0.9975   | 6.19978 | 1.03436  | 6.19826 | 1.03896  |
| 0.99708  | 6.00079 | 1.02497  | 5.99978 | 1.03716  | 5.99826 | 1.05132  |
| 0.99953  | 5.80083 | 1.02088  | 5.79978 | 1.03939  | 5.79823 | 1.0552   |
| 0.99881  | 5.60082 | 1.01818  | 5.59977 | 1.03964  | 5.59825 | 1.04945  |
| 1.00402  | 5.40082 | 1.02355  | 5.39979 | 1.03871  | 5.39826 | 1.05292  |
| 1.001    | 5.20081 | 1.03167  | 5.19978 | 1.03886  | 5.19826 | 1.05264  |
| 1.0018   | 5.00082 | 1.02545  | 4.99978 | 1.04068  | 4.99826 | 1.06667  |
| 1.00507  | 4.80082 | 1.02838  | 4.79978 | 1.04371  | 4.79825 | 1.05009  |
| 1.00307  | 4.60082 | 1.03288  | 4.59979 | 1.04356  | 4.59824 | 1.04766  |
| 1.00558  | 4.40083 | 1.02619  | 4.39977 | 1.04057  | 4.39826 | 1.05796  |
| 1.00449  | 4.20084 | 1.02832  | 4.19979 | 1.04196  | 4.19825 | 1.0621   |
| 1.00423  | 4.00083 | 1.02876  | 3.9998  | 1.04102  | 3.99826 | 1.05749  |
| 1.00407  | 3.80082 | 1.04675  | 3.79979 | 1.0488   | 3.79826 | 1.05731  |
| 1.00768  | 3.60083 | 1.03729  | 3.59977 | 1.03905  | 3.59826 | 1.04427  |
| 1.00306  | 3.40082 | 1.02152  | 3.39979 | 1.05195  | 3.39826 | 1.06535  |
| 1.00208  | 3.20082 | 1.02081  | 3.19978 | 1.04062  | 3.19824 | 1.05668  |
| 1.00159  | 3.00083 | 1.04045  | 2.99977 | 1.04189  | 2.99826 | 1.06011  |
| 1.00128  | 2.80082 | 1.02062  | 2.79978 | 1.04199  | 2.79825 | 1.05725  |
| 0.99977  | 2.60082 | 1.02078  | 2.59978 | 1.03915  | 2.59824 | 1.05582  |
| 1.00616  | 2.40081 | 1.03255  | 2.3998  | 1.0351   | 2.39823 | 1.06106  |
| 1.00014  | 2.20082 | 1.01593  | 2.19978 | 1.03359  | 2.19826 | 1.01566  |
| 0.9718   | 2.00082 | 1.01564  | 1.99978 | 1.03928  | 1.99825 | 1.0428   |
| 0.99966  | 1.80081 | 1.00671  | 1.79978 | 1.02662  | 1.79824 | 1.04175  |
| 0.99447  | 1.60083 | 1.0108   | 1.59978 | 1.02023  | 1.59824 | 1.03027  |
| 0.99187  | 1.40081 | 0.97951  | 1.39978 | 1.01642  | 1.39825 | 1.02979  |
| 0.99552  | 1.30081 | 0.99399  | 1.29979 | 1.00995  | 1.29826 | 1.02154  |
| 0.94869  | 1.20082 | 0.99233  | 1.19975 | 1.00684  | 1.19823 | 1.02281  |
| 0.99048  | 1.10082 | 1.00262  | 1.09976 | 1.00222  | 1.09822 | 0.99922  |
| 0.97988  | 1.00083 | 0.98544  | 0.9998  | 0.99763  | 0.99824 | 1.00036  |
| 0.98031  | 0.90081 | 0.97973  | 0.89977 | 0.99164  | 0.89821 | 0.9809   |
| 0.96496  | 0.80081 | 0.95344  | 0.79977 | 0.98841  | 0.79824 | 0.97478  |
| 0.97962  | 0.70081 | 0.96494  | 0.6998  | 0.96532  | 0.69825 | 0.96842  |
| 0.94838  | 0.60082 | 0.95873  | 0.59979 | 0.96614  | 0.59826 | 0.94622  |
| 0.92864  | 0.5008  | 0.94304  | 0.49977 | 0.94153  | 0.49824 | 0.93254  |
| 0.89934  | 0.40084 | 0.91147  | 0.39977 | 0.92086  | 0.39824 | 0.89413  |
| 0.83948  | 0.30081 | 0.86017  | 0.29978 | 0.91323  | 0.29823 | 0.83171  |
| 0.70155  | 0.2008  | 0.7452   | 0.19979 | 0.7788   | 0.19826 | 0.76443  |
| 0.66315  | 0.18083 | 0.71081  | 0.17974 | 0.77542  | 0.17824 | 0.70318  |
| 0.62717  | 0.16081 | 0.66664  | 0.15977 | 0.70296  | 0.15822 | 0.67995  |
| 0.58065  | 0.14078 | 0.60931  | 0.13974 | 0.64881  | 0.1382  | 0.63736  |
| 0.53243  | 0.12082 | 0.56803  | 0.11974 | 0.60057  | 0.11821 | 0.60403  |
| 0.47758  | 0.10081 | 0.50381  | 0.09977 | 0.53474  | 0.09824 | 0.54175  |

|          |          |          |           |          |          |          |
|----------|----------|----------|-----------|----------|----------|----------|
| 0.42728  | 0.0808   | 0.44616  | 0.07976   | 0.45962  | 0.07823  | 0.44554  |
| 0.34511  | 0.06083  | 0.36413  | 0.05975   | 0.38217  | 0.05822  | 0.3998   |
| 0.26878  | 0.0408   | 0.28519  | 0.0398    | 0.29206  | 0.03825  | 0.33499  |
| 0.18779  | 0.0208   | 0.19418  | 0.01977   | 0.19395  | 0.01824  | 0.21     |
| 0.1027   | 8.27E-04 | 0.09754  | -2.56E-04 | 0.07654  | -0.00178 | 0.07522  |
| 0.00312  | -0.01919 | -0.0178  | -0.02023  | -0.04752 | -0.02176 | -0.06785 |
| -0.09819 | -0.03921 | -0.12472 | -0.04024  | -0.15902 | -0.04177 | -0.18717 |
| -0.19706 | -0.05921 | -0.22695 | -0.06024  | -0.28292 | -0.06178 | -0.32246 |
| -0.28825 | -0.07918 | -0.3288  | -0.08021  | -0.39067 | -0.08175 | -0.42505 |
| -0.37099 | -0.09919 | -0.41012 | -0.10022  | -0.47953 | -0.10175 | -0.51339 |
| -0.43437 | -0.1192  | -0.4789  | -0.12025  | -0.54783 | -0.12177 | -0.5647  |
| -0.50299 | -0.13919 | -0.54354 | -0.14022  | -0.61132 | -0.14175 | -0.61187 |
| -0.56065 | -0.15917 | -0.60769 | -0.1602   | -0.67357 | -0.16174 | -0.66548 |
| -0.61796 | -0.1792  | -0.65884 | -0.18021  | -0.7213  | -0.18175 | -0.70312 |
| -0.67083 | -0.19924 | -0.70727 | -0.20026  | -0.76055 | -0.2018  | -0.72604 |
| -0.81242 | -0.29921 | -0.83107 | -0.30025  | -0.84476 | -0.30179 | -0.79329 |
| -0.88466 | -0.39919 | -0.88207 | -0.40021  | -0.89272 | -0.40174 | -0.84251 |
| -0.91799 | -0.49919 | -0.91209 | -0.50021  | -0.91839 | -0.50175 | -0.87079 |
| -0.93535 | -0.59919 | -0.92733 | -0.60023  | -0.93213 | -0.60174 | -0.89134 |
| -0.94876 | -0.69919 | -0.93918 | -0.70023  | -0.94469 | -0.70175 | -0.90328 |
| -0.95571 | -0.79918 | -0.94595 | -0.80022  | -0.9363  | -0.80175 | -0.90154 |
| -0.95476 | -0.89917 | -0.95153 | -0.90024  | -0.9801  | -0.90176 | -0.91484 |
| -0.96153 | -0.99917 | -0.95587 | -1.00024  | -0.96486 | -1.00176 | -0.93914 |
| -0.95292 | -1.09918 | -0.95878 | -1.1002   | -0.97037 | -1.10174 | -0.94191 |
| -0.9685  | -1.1992  | -0.9623  | -1.20022  | -0.97141 | -1.20176 | -0.94196 |
| -0.97225 | -1.29918 | -0.96509 | -1.30021  | -0.97913 | -1.30175 | -0.95084 |
| -0.97374 | -1.39918 | -0.96689 | -1.40021  | -0.97928 | -1.40176 | -0.95706 |
| -0.97377 | -1.59916 | -0.96863 | -1.60023  | -0.97891 | -1.60175 | -0.95533 |
| -0.9781  | -1.79916 | -0.97069 | -1.80023  | -0.98507 | -1.80175 | -0.96527 |
| -0.97946 | -1.99919 | -0.97377 | -2.00023  | -0.98735 | -2.00176 | -0.96669 |
| -0.97966 | -2.19918 | -0.97767 | -2.20021  | -0.98701 | -2.20175 | -0.97345 |
| -0.98021 | -2.39918 | -0.97629 | -2.40022  | -0.98938 | -2.40174 | -0.97996 |
| -0.98031 | -2.59918 | -0.97973 | -2.60022  | -0.99164 | -2.60174 | -0.9809  |
| -0.9816  | -2.79918 | -0.98212 | -2.80023  | -0.99115 | -2.80175 | -0.9847  |
| -0.98192 | -2.99917 | -0.98188 | -3.00022  | -0.99391 | -3.00174 | -0.98323 |
| -0.97805 | -3.19917 | -0.98124 | -3.20022  | -0.99062 | -3.20176 | -0.98388 |
| -0.9816  | -3.39917 | -0.98286 | -3.40021  | -0.9977  | -3.40175 | -0.98156 |
| -0.98055 | -3.59917 | -0.98286 | -3.60022  | -0.9957  | -3.60173 | -0.98596 |
| -0.98233 | -3.79918 | -0.98477 | -3.80022  | -0.99603 | -3.80174 | -0.9848  |
| -0.97832 | -3.99918 | -0.98318 | -4.00022  | -0.99935 | -4.00176 | -0.98899 |
| -0.97985 | -4.19918 | -0.98103 | -4.20022  | -1.00061 | -4.20174 | -0.98337 |
| -0.97915 | -4.39917 | -0.98233 | -4.40022  | -0.99654 | -4.40176 | -0.98017 |
| -0.9781  | -4.59917 | -0.98279 | -4.6002   | -0.99909 | -4.60177 | -0.98061 |
| -0.97747 | -4.79917 | -0.98261 | -4.80023  | -1.00027 | -4.80176 | -0.97775 |
| -0.97722 | -4.99919 | -0.98356 | -5.00021  | -1.0014  | -5.00174 | -0.97865 |
| -0.97592 | -5.19919 | -0.98287 | -5.20022  | -1.00003 | -5.20173 | -0.96986 |
| -0.97496 | -5.39918 | -0.98335 | -5.40022  | -0.99656 | -5.40174 | -0.96618 |

|          |          |          |          |          |          |          |
|----------|----------|----------|----------|----------|----------|----------|
| -0.9742  | -5.59919 | -0.98398 | -5.60021 | -0.99575 | -5.60177 | -0.96626 |
| -0.97062 | -5.79918 | -0.9865  | -5.80022 | -0.99578 | -5.80174 | -0.95726 |
| -0.97349 | -5.99918 | -0.98736 | -6.00021 | -0.99517 | -6.00175 | -0.96239 |
| -0.96906 | -6.19919 | -0.9854  | -6.20022 | -0.98729 | -6.20175 | -0.96983 |
| -0.97072 | -6.39917 | -0.98121 | -6.40021 | -0.99346 | -6.40175 | -0.96117 |
| -0.97005 | -6.59916 | -0.98636 | -6.60022 | -0.99514 | -6.60177 | -0.96014 |
| -0.97013 | -6.79917 | -0.98599 | -6.80022 | -0.99035 | -6.80174 | -0.96073 |
| -0.97494 | -6.99919 | -0.98399 | -7.00021 | -0.9913  | -7.00175 | -0.9558  |
| -0.96817 | -6.9992  | -0.98242 | -7.00021 | -0.98752 | -7.00175 | -0.94435 |
| -0.97029 | -6.79917 | -0.98573 | -6.80021 | -0.99252 | -6.80175 | -0.95501 |
| -0.96854 | -6.59917 | -0.98584 | -6.60021 | -0.99104 | -6.60175 | -0.96067 |
| -0.97046 | -6.39918 | -0.9899  | -6.40022 | -0.99176 | -6.40176 | -0.95884 |
| -0.97645 | -6.19919 | -0.99273 | -6.2002  | -0.99563 | -6.20176 | -0.95604 |
| -0.95337 | -5.99918 | -0.98665 | -6.0002  | -0.9892  | -6.00174 | -0.96807 |
| -0.97568 | -5.79917 | -0.98728 | -5.80021 | -0.99353 | -5.80173 | -0.97966 |
| -0.97818 | -5.5992  | -0.99026 | -5.6002  | -0.99036 | -5.60175 | -0.97273 |
| -0.97748 | -5.39919 | -0.9856  | -5.40021 | -0.99879 | -5.40175 | -0.9813  |
| -0.97958 | -5.19919 | -0.99436 | -5.20022 | -0.99732 | -5.20175 | -0.97557 |
| -0.97872 | -4.99919 | -0.98643 | -5.00023 | -0.99282 | -5.00174 | -0.97901 |
| -0.98231 | -4.79918 | -0.98547 | -4.8002  | -1.00227 | -4.80176 | -0.97897 |
| -0.98133 | -4.59917 | -0.98494 | -4.60023 | -1.00318 | -4.60173 | -0.97956 |
| -0.98095 | -4.39918 | -1.00601 | -4.40021 | -1.00087 | -4.40176 | -0.98546 |
| -1.05869 | -4.19916 | -0.99555 | -4.20021 | -0.99968 | -4.20176 | -1.00745 |
| -0.97544 | -3.99918 | -0.99594 | -4.00022 | -0.99942 | -4.00175 | -0.98465 |
| -0.98242 | -3.79917 | -0.97545 | -3.80022 | -0.99897 | -3.80176 | -0.98534 |
| -0.98449 | -3.59918 | -0.9875  | -3.60024 | -1.0037  | -3.60178 | -0.98365 |
| -0.9915  | -3.39921 | -0.98358 | -3.40026 | -1.01025 | -3.40175 | -0.96443 |
| -0.98234 | -3.19918 | -0.9835  | -3.20023 | -1.00047 | -3.20181 | -0.98209 |
| -0.98534 | -2.99919 | -0.98168 | -3.00025 | -1.00416 | -3.00176 | -0.97835 |
| -0.98161 | -2.79917 | -0.99859 | -2.80028 | -0.99774 | -2.8018  | -1.01963 |
| -0.97021 | -2.5992  | -0.98343 | -2.60023 | -0.99335 | -2.60182 | -0.97727 |
| -0.97814 | -2.39917 | -0.9811  | -2.40027 | -0.98985 | -2.40179 | -0.96115 |
| -0.9857  | -2.19917 | -0.97488 | -2.20027 | -1.00287 | -2.20176 | -0.97951 |
| -0.97806 | -1.99919 | -0.98234 | -2.00026 | -0.9877  | -2.00182 | -0.97067 |
| -0.9775  | -1.79919 | -0.97059 | -1.80028 | -0.9598  | -1.80181 | -0.9759  |
| -0.9728  | -1.59919 | -0.96849 | -1.60027 | -0.97207 | -1.6018  | -0.95749 |
| -0.97401 | -1.39926 | -0.96582 | -1.40027 | -0.96595 | -1.40183 | -0.94658 |
| -0.96783 | -1.29922 | -0.94237 | -1.30028 | -0.97353 | -1.30181 | -0.93198 |
| -0.96578 | -1.19919 | -0.95868 | -1.20025 | -0.96552 | -1.20178 | -0.92793 |
| -0.96315 | -1.09921 | -0.95515 | -1.10026 | -0.95875 | -1.10179 | -0.92196 |
| -0.95235 | -0.99923 | -0.94615 | -1.00027 | -0.96419 | -1.0018  | -0.91824 |
| -0.96103 | -0.8992  | -0.95144 | -0.90023 | -0.96333 | -0.90177 | -0.90551 |
| -0.95106 | -0.79922 | -0.93773 | -0.80026 | -0.94647 | -0.8018  | -0.87199 |
| -0.94119 | -0.69925 | -0.93477 | -0.70028 | -0.94008 | -0.70181 | -0.8878  |
| -0.93135 | -0.59925 | -0.92541 | -0.60029 | -0.92601 | -0.60181 | -0.85883 |
| -0.90919 | -0.49922 | -0.90789 | -0.50028 | -0.9193  | -0.50179 | -0.86577 |
| -0.86268 | -0.39921 | -0.87407 | -0.40029 | -0.92725 | -0.4018  | -0.82832 |

|          |          |          |           |          |          |          |
|----------|----------|----------|-----------|----------|----------|----------|
| -0.81647 | -0.29924 | -0.82452 | -0.3003   | -0.83471 | -0.30181 | -0.77859 |
| -0.70068 | -0.19925 | -0.71565 | -0.20027  | -0.73752 | -0.20182 | -0.70783 |
| -0.64671 | -0.17925 | -0.66812 | -0.18026  | -0.69788 | -0.18182 | -0.63338 |
| -0.61122 | -0.15924 | -0.6298  | -0.16027  | -0.65942 | -0.16181 | -0.61407 |
| -0.5659  | -0.13921 | -0.58082 | -0.14024  | -0.61374 | -0.14178 | -0.56736 |
| -0.51366 | -0.11926 | -0.5263  | -0.12028  | -0.55642 | -0.12182 | -0.53256 |
| -0.46018 | -0.09925 | -0.45635 | -0.10028  | -0.49853 | -0.10181 | -0.46415 |
| -0.39954 | -0.07922 | -0.4029  | -0.08027  | -0.4209  | -0.0818  | -0.41717 |
| -0.32894 | -0.05926 | -0.32713 | -0.06028  | -0.35243 | -0.06181 | -0.34706 |
| -0.25678 | -0.03923 | -0.2494  | -0.04027  | -0.25895 | -0.0418  | -0.28514 |
| -0.18038 | -0.01925 | -0.16497 | -0.02029  | -0.16355 | -0.0218  | -0.23553 |
| -0.10828 | 7.61E-04 | -0.06537 | -2.45E-04 | -0.04325 | -0.00183 | -0.01174 |
| 0.00899  | 0.02078  | 0.0452   | 0.01971   | 0.08131  | 0.01819  | 0.12802  |
| 0.11621  | 0.04075  | 0.15076  | 0.03974   | 0.20064  | 0.03823  | 0.25802  |
| 0.21296  | 0.06077  | 0.25675  | 0.05974   | 0.31632  | 0.05818  | 0.38257  |
| 0.30434  | 0.08079  | 0.35643  | 0.07971   | 0.42195  | 0.0782   | 0.4981   |
| 0.37738  | 0.10075  | 0.4387   | 0.09972   | 0.51675  | 0.0982   | 0.57188  |
| 0.45202  | 0.12077  | 0.51109  | 0.11976   | 0.58233  | 0.11822  | 0.64113  |
| 0.51651  | 0.14076  | 0.57825  | 0.1397    | 0.65792  | 0.13819  | 0.68411  |
| 0.57527  | 0.16075  | 0.64122  | 0.15972   | 0.70933  | 0.15821  | 0.72478  |
| 0.6328   | 0.18077  | 0.6948   | 0.17974   | 0.75849  | 0.17823  | 0.7633   |
| 0.67993  | 0.20082  | 0.73636  | 0.19975   | 0.78832  | 0.19823  | 0.80592  |
| 0.82103  | 0.30082  | 0.8552   | 0.29978   | 0.87016  | 0.29825  | 0.84804  |
| 0.89354  | 0.4008   | 0.91386  | 0.39978   | 0.92486  | 0.39824  | 0.89656  |
| 0.92816  | 0.50082  | 0.94073  | 0.49973   | 0.94651  | 0.49825  | 0.92909  |
| 0.94371  | 0.60082  | 0.95479  | 0.59978   | 0.95745  | 0.59826  | 0.9434   |
| 0.95678  | 0.70083  | 0.96716  | 0.69977   | 0.9699   | 0.69826  | 0.96119  |
| 0.96468  | 0.8008   | 0.97203  | 0.79976   | 0.97857  | 0.79824  | 0.9719   |
| 0.97397  | 0.90077  | 0.98148  | 0.89978   | 0.98715  | 0.89825  | 0.98917  |
| 0.97641  | 1.0008   | 0.98332  | 0.99977   | 0.98989  | 0.99824  | 0.98637  |
| 0.98297  | 1.1008   | 0.99181  | 1.09976   | 0.99322  | 1.09823  | 0.99719  |
| 0.9846   | 1.20082  | 0.99255  | 1.19977   | 1.00051  | 1.19825  | 1.00157  |
| 0.98697  | 1.30082  | 0.99588  | 1.29978   | 1.00684  | 1.29826  | 1.00687  |
| 0.98671  | 1.40082  | 0.99781  | 1.39978   | 1.00751  | 1.39825  | 1.01181  |
| 0.98775  | 1.60081  | 0.9995   | 1.59977   | 1.00819  | 1.59824  | 1.01442  |
| 0.99007  | 1.80081  | 1.00265  | 1.79977   | 1.01053  | 1.79824  | 1.01959  |
| 0.99157  | 2.00081  | 1.00455  | 1.99977   | 1.01353  | 1.99824  | 1.02232  |
| 0.99282  | 2.20084  | 1.00708  | 2.19978   | 1.01683  | 2.19825  | 1.02617  |
| 0.99239  | 2.40082  | 1.01067  | 2.3998    | 1.01996  | 2.39826  | 1.03156  |
| 0.99459  | 2.60082  | 1.01115  | 2.59978   | 1.02004  | 2.59824  | 1.0306   |
| 0.99345  | 2.80081  | 1.01216  | 2.79978   | 1.02479  | 2.79825  | 1.03437  |
| 0.99444  | 3.00081  | 1.0149   | 2.99978   | 1.02084  | 2.99825  | 1.03339  |
| 0.99275  | 3.20084  | 1.01441  | 3.19977   | 1.0233   | 3.19826  | 1.03755  |
| 0.99139  | 3.40084  | 1.01534  | 3.39977   | 1.02095  | 3.39824  | 1.03423  |
| 0.98955  | 3.60082  | 1.01586  | 3.59978   | 1.02335  | 3.59824  | 1.03781  |
| 0.98975  | 3.80082  | 1.01325  | 3.79979   | 1.02777  | 3.79825  | 1.03154  |
| 0.99169  | 4.00081  | 1.0134   | 3.99978   | 1.01693  | 3.99826  | 1.0331   |

|         |         |         |         |         |         |         |
|---------|---------|---------|---------|---------|---------|---------|
| 0.98606 | 4.20082 | 1.01682 | 4.19977 | 1.02629 | 4.19824 | 1.02501 |
| 0.98059 | 4.40083 | 1.01821 | 4.3998  | 1.02571 | 4.39825 | 1.02401 |
| 0.98687 | 4.60084 | 1.01255 | 4.59978 | 1.03228 | 4.59826 | 1.02586 |
| 0.9863  | 4.80083 | 1.00896 | 4.7998  | 1.02552 | 4.79824 | 1.02643 |
| 0.98388 | 5.00081 | 1.01394 | 4.99978 | 1.01713 | 4.99825 | 1.02987 |
| 0.98299 | 5.20081 | 1.01966 | 5.19979 | 1.019   | 5.19825 | 1.01745 |
| 0.98323 | 5.40082 | 1.01405 | 5.39979 | 1.0207  | 5.39824 | 1.02274 |
| 0.98241 | 5.60082 | 1.01825 | 5.59978 | 1.01812 | 5.59825 | 1.00839 |
| 0.98542 | 5.80083 | 1.01528 | 5.79979 | 1.01474 | 5.79826 | 1.01064 |
| 0.98341 | 6.00083 | 1.0171  | 5.99979 | 1.01605 | 5.99826 | 1.01204 |
| 0.98418 | 6.20082 | 1.01475 | 6.19978 | 1.01033 | 6.19826 | 1.00783 |
| 0.9836  | 6.40084 | 1.01637 | 6.39977 | 1.0121  | 6.39824 | 1.00503 |
| 0.98074 | 6.60083 | 1.02034 | 6.59979 | 1.00864 | 6.59824 | 1.00628 |
| 0.97837 | 6.80082 | 1.01598 | 6.79978 | 1.00832 | 6.79825 | 0.99853 |
| 0.98184 | 7.00082 | 1.01801 | 6.99978 | 1.01364 | 6.99825 | 0.99421 |















| moH     | T750K-PA | moH     | T800K-PA |
|---------|----------|---------|----------|
| 6.99326 | 0.99165  | 7.00745 | 1.05222  |
| 6.79326 | 1.023    | 6.80744 | 1.08246  |
| 6.59327 | 1.02578  | 6.60745 | 1.05259  |
| 6.39326 | 1.0574   | 6.40744 | 1.0634   |
| 6.19327 | 1.01804  | 6.20747 | 1.05787  |
| 5.99326 | 1.03105  | 6.00745 | 1.04921  |
| 5.79324 | 1.05084  | 5.80745 | 1.05419  |
| 5.59327 | 1.0306   | 5.60746 | 1.06749  |
| 5.39327 | 1.05614  | 5.40747 | 1.05139  |
| 5.19326 | 1.05019  | 5.20746 | 1.05002  |
| 4.99326 | 1.00189  | 5.00746 | 1.06288  |
| 4.79326 | 1.05804  | 4.80744 | 1.03534  |
| 4.59326 | 1.0335   | 4.60745 | 1.0631   |
| 4.39327 | 1.06237  | 4.40747 | 1.02631  |
| 4.19327 | 1.03298  | 4.20746 | 1.0548   |
| 3.99325 | 1.06836  | 4.00745 | 1.04692  |
| 3.79327 | 1.06605  | 3.80745 | 0.99781  |
| 3.59327 | 1.07862  | 3.60744 | 1.06362  |
| 3.39327 | 1.05842  | 3.40745 | 1.03532  |
| 3.19325 | 1.0617   | 3.20746 | 1.04787  |
| 2.99327 | 1.05122  | 3.00747 | 1.05738  |
| 2.79325 | 1.04532  | 2.80745 | 1.04839  |
| 2.59325 | 1.04351  | 2.60746 | 1.07739  |
| 2.39327 | 1.04182  | 2.40747 | 1.05564  |
| 2.19326 | 1.03181  | 2.20746 | 1.03583  |
| 1.99325 | 1.00611  | 2.00745 | 1.03005  |
| 1.79327 | 0.99713  | 1.80745 | 1.13257  |
| 1.59325 | 1.01062  | 1.60744 | 1.02152  |
| 1.39328 | 0.94097  | 1.40745 | 1.02384  |
| 1.29325 | 0.98655  | 1.30745 | 1.00276  |
| 1.19326 | 0.97437  | 1.20744 | 1.02761  |
| 1.09326 | 0.97724  | 1.10744 | 0.99155  |
| 0.99326 | 0.9955   | 1.00745 | 0.99294  |
| 0.89327 | 0.94683  | 0.90745 | 0.98518  |
| 0.79327 | 0.92711  | 0.80745 | 0.97279  |
| 0.69325 | 0.91431  | 0.70746 | 0.99727  |
| 0.59327 | 0.8885   | 0.60745 | 0.95443  |
| 0.49327 | 0.86044  | 0.50746 | 0.93817  |
| 0.39325 | 0.83447  | 0.40746 | 0.90474  |
| 0.29327 | 0.77804  | 0.30746 | 0.84735  |
| 0.19325 | 0.63872  | 0.20746 | 0.74714  |
| 0.17325 | 0.56829  | 0.18746 | 0.65209  |
| 0.15327 | 0.54409  | 0.16744 | 0.62835  |
| 0.13326 | 0.50739  | 0.14742 | 0.77342  |
| 0.11325 | 0.47128  | 0.12743 | 0.4766   |
| 0.09327 | 0.41703  | 0.10744 | 0.54596  |

|          |          |          |          |
|----------|----------|----------|----------|
| 0.07327  | 0.37468  | 0.08743  | 0.40841  |
| 0.05325  | 0.3137   | 0.06747  | 0.36421  |
| 0.03327  | 0.24163  | 0.04746  | 0.27065  |
| 0.01325  | 0.22588  | 0.02744  | 0.19713  |
| -0.00672 | 0.07454  | 0.00746  | 0.03834  |
| -0.02676 | -0.05593 | -0.01255 | -0.08595 |
| -0.04679 | -0.15863 | -0.03256 | -0.20502 |
| -0.06674 | -0.27562 | -0.05256 | -0.35545 |
| -0.08675 | -0.39343 | -0.07256 | -0.47651 |
| -0.10676 | -0.46963 | -0.09254 | -0.56283 |
| -0.12673 | -0.52049 | -0.11255 | -0.62282 |
| -0.14674 | -0.55971 | -0.13255 | -0.66828 |
| -0.16677 | -0.60877 | -0.15253 | -0.7038  |
| -0.18672 | -0.64084 | -0.17256 | -0.73892 |
| -0.20681 | -0.67261 | -0.19256 | -0.78213 |
| -0.30673 | -0.73453 | -0.29257 | -0.81968 |
| -0.40673 | -0.77421 | -0.39255 | -0.88475 |
| -0.50674 | -0.83147 | -0.49256 | -0.89118 |
| -0.60674 | -0.85739 | -0.59255 | -0.91837 |
| -0.70675 | -0.88172 | -0.69255 | -0.94549 |
| -0.80674 | -0.89451 | -0.79255 | -0.94507 |
| -0.90674 | -0.90193 | -0.89256 | -0.9482  |
| -1.00674 | -0.92685 | -0.99257 | -0.94404 |
| -1.10675 | -0.92065 | -1.09255 | -0.93829 |
| -1.20674 | -0.94249 | -1.19258 | -0.97295 |
| -1.30672 | -0.9248  | -1.29257 | -0.97579 |
| -1.40675 | -0.95585 | -1.39255 | -0.9732  |
| -1.60673 | -0.95905 | -1.59254 | -0.98445 |
| -1.80673 | -0.97098 | -1.79254 | -0.98108 |
| -2.00674 | -0.97933 | -1.99256 | -0.98232 |
| -2.20673 | -0.98272 | -2.19255 | -0.98514 |
| -2.40674 | -0.99501 | -2.39257 | -0.98855 |
| -2.60673 | -0.99683 | -2.59254 | -0.98518 |
| -2.80675 | -1.001   | -2.79255 | -0.99834 |
| -3.00674 | -0.99996 | -2.99255 | -0.99541 |
| -3.20675 | -0.99985 | -3.19256 | -0.99225 |
| -3.40673 | -1.0013  | -3.39253 | -0.9893  |
| -3.60673 | -1.00724 | -3.59255 | -0.99751 |
| -3.80674 | -1.00209 | -3.79254 | -0.9948  |
| -4.00673 | -1.00408 | -3.99254 | -0.9974  |
| -4.20672 | -0.99324 | -4.19254 | -0.98676 |
| -4.40674 | -0.98989 | -4.39254 | -1.00953 |
| -4.60675 | -0.98502 | -4.59255 | -1.00072 |
| -4.80673 | -0.99177 | -4.79257 | -0.97875 |
| -5.00674 | -0.98765 | -4.99257 | -0.99529 |
| -5.20672 | -0.97645 | -5.19254 | -0.99596 |
| -5.40672 | -0.99114 | -5.39255 | -1.00999 |

|          |          |          |          |
|----------|----------|----------|----------|
| -5.60675 | -0.96983 | -5.59255 | -0.99996 |
| -5.80674 | -0.96846 | -5.79256 | -0.9925  |
| -6.00674 | -0.96954 | -5.99255 | -1.00152 |
| -6.20674 | -0.96427 | -6.19256 | -1.00409 |
| -6.40675 | -0.96186 | -6.39255 | -1.01743 |
| -6.60676 | -0.9473  | -6.59257 | -1.00011 |
| -6.80673 | -0.93899 | -6.79254 | -1.00272 |
| -7.00676 | -0.94821 | -6.99254 | -1.01693 |
| -7.00676 | -0.9388  | -6.99254 | -0.99975 |
| -6.80674 | -0.96177 | -6.79256 | -1.00494 |
| -6.60673 | -0.96053 | -6.59257 | -1.00967 |
| -6.40675 | -0.97363 | -6.39253 | -0.93306 |
| -6.20675 | -1.01334 | -6.19254 | -0.99399 |
| -6.00673 | -0.9709  | -5.99253 | -1.02922 |
| -5.80673 | -0.97432 | -5.79254 | -1.01769 |
| -5.60673 | -0.99095 | -5.59254 | -1.00555 |
| -5.40674 | -0.93319 | -5.39255 | -1.068   |
| -5.20675 | -0.99335 | -5.19256 | -0.93909 |
| -5.00673 | -1.01286 | -4.99253 | -1.02    |
| -4.80673 | -0.99835 | -4.79255 | -1.00908 |
| -4.60675 | -1.01781 | -4.59256 | -0.96336 |
| -4.40673 | -1.01016 | -4.39255 | -1.0071  |
| -4.20674 | -0.98948 | -4.19255 | -1.00496 |
| -4.00674 | -1.00468 | -3.99255 | -1.00478 |
| -3.80672 | -1.00201 | -3.79257 | -1.01393 |
| -3.60675 | -1.01001 | -3.59257 | -1.02297 |
| -3.40678 | -1.0024  | -3.39256 | -1.02618 |
| -3.20675 | -0.99894 | -3.19253 | -0.82699 |
| -3.00677 | -1.01202 | -2.99258 | -0.99884 |
| -2.80681 | -0.95968 | -2.79262 | -0.99103 |
| -2.60674 | -1.09332 | -2.59254 | -0.997   |
| -2.40677 | -0.99731 | -2.39262 | -1.00282 |
| -2.20682 | -0.95753 | -2.19255 | -0.94608 |
| -2.00679 | -0.98727 | -1.99262 | -0.98629 |
| -1.8068  | -1.01196 | -1.79263 | -0.96815 |
| -1.60679 | -0.92813 | -1.5926  | -1.06852 |
| -1.40682 | -0.99505 | -1.39259 | -0.97092 |
| -1.30681 | -0.94787 | -1.29262 | -0.97863 |
| -1.20677 | -0.97088 | -1.1926  | -0.9355  |
| -1.10678 | -0.92565 | -1.0926  | -0.94458 |
| -1.00681 | -0.91866 | -0.99263 | -0.94084 |
| -0.90677 | -0.90185 | -0.89258 | -0.94938 |
| -0.80679 | -0.88137 | -0.7926  | -0.9284  |
| -0.70681 | -0.88861 | -0.69262 | -0.85779 |
| -0.60679 | -0.8569  | -0.59263 | -0.90299 |
| -0.50681 | -0.82716 | -0.4926  | -0.86488 |
| -0.40681 | -0.78996 | -0.39259 | -0.84796 |



|          |          |          |          |
|----------|----------|----------|----------|
| -0.30679 | -0.73003 | -0.29262 | -0.79569 |
| -0.20682 | -0.62661 | -0.19261 | -0.71438 |
| -0.1868  | -0.5539  | -0.17262 | -0.61766 |
| -0.16681 | -0.38778 | -0.15261 | -0.59452 |
| -0.1468  | -0.48391 | -0.13258 | -0.55682 |
| -0.12681 | -0.4402  | -0.11261 | -0.48975 |
| -0.10681 | -0.38159 | -0.0926  | -0.44865 |
| -0.0868  | -0.27928 | -0.07259 | -0.40767 |
| -0.06679 | -0.2821  | -0.05263 | -0.32577 |
| -0.0468  | -0.20498 | -0.03259 | -0.23159 |
| -0.02681 | -0.14152 | -0.01263 | -0.14033 |
| -0.0068  | -0.03004 | 0.00738  | -0.00871 |
| 0.01322  | 0.09991  | 0.02741  | 0.11367  |
| 0.03321  | 0.20989  | 0.04742  | 0.25128  |
| 0.05321  | 0.33096  | 0.06737  | 0.36462  |
| 0.07323  | 0.40822  | 0.08739  | 0.497    |
| 0.09319  | 0.50177  | 0.10742  | 0.61101  |
| 0.1132   | 0.55285  | 0.12738  | 0.64532  |
| 0.13322  | 0.60481  | 0.14738  | 0.69245  |
| 0.15324  | 0.65134  | 0.16739  | 0.73004  |
| 0.17321  | 0.69455  | 0.18739  | 0.77799  |
| 0.19326  | 0.72164  | 0.20744  | 0.80643  |
| 0.29327  | 0.78366  | 0.30744  | 0.8467   |
| 0.39325  | 0.84426  | 0.40741  | 0.90202  |
| 0.49327  | 0.8811   | 0.50744  | 0.93921  |
| 0.59327  | 0.88311  | 0.60745  | 0.95277  |
| 0.69327  | 0.92986  | 0.70745  | 0.96051  |
| 0.79324  | 0.97767  | 0.80744  | 0.97669  |
| 0.89326  | 0.95766  | 0.90739  | 0.99495  |
| 0.99325  | 0.96775  | 1.00746  | 0.97281  |
| 1.09326  | 0.97557  | 1.10744  | 0.99688  |
| 1.19327  | 0.97777  | 1.20746  | 1.00315  |
| 1.29327  | 0.99037  | 1.30746  | 1.00303  |
| 1.39327  | 0.99809  | 1.40746  | 0.99896  |
| 1.59325  | 1.00211  | 1.60745  | 1.00024  |
| 1.79326  | 1.00805  | 1.80745  | 1.00238  |
| 1.99326  | 1.01677  | 2.00745  | 1.01006  |
| 2.19325  | 1.02807  | 2.20744  | 1.01289  |
| 2.39327  | 1.0236   | 2.40746  | 1.01361  |
| 2.59326  | 1.02881  | 2.60744  | 1.01958  |
| 2.79326  | 1.02879  | 2.80746  | 1.02212  |
| 2.99327  | 1.03354  | 3.00746  | 1.01358  |
| 3.19326  | 1.032    | 3.20746  | 1.01541  |
| 3.39324  | 1.02817  | 3.40746  | 1.01598  |
| 3.59326  | 1.03185  | 3.60745  | 1.01838  |
| 3.79326  | 1.0278   | 3.80745  | 1.02806  |
| 3.99327  | 1.02354  | 4.00746  | 1.05325  |

|         |         |         |         |
|---------|---------|---------|---------|
| 4.19326 | 1.02889 | 4.20745 | 1.01533 |
| 4.39326 | 1.01935 | 4.40746 | 1.02305 |
| 4.59325 | 1.0324  | 4.60744 | 1.04047 |
| 4.79325 | 1.00089 | 4.80746 | 1.02759 |
| 4.99325 | 1.00964 | 5.00746 | 1.03609 |
| 5.19326 | 1.01393 | 5.20746 | 1.03364 |
| 5.39327 | 1.00048 | 5.40746 | 1.02392 |
| 5.59326 | 0.99573 | 5.60745 | 1.03209 |
| 5.79324 | 0.99875 | 5.80747 | 1.01736 |
| 5.99327 | 0.98946 | 6.00746 | 1.35416 |
| 6.19327 | 0.98473 | 6.20746 | 1.00781 |
| 6.39325 | 0.97615 | 6.40745 | 1.01905 |
| 6.59325 | 0.97986 | 6.60744 | 1.01712 |
| 6.79326 | 0.97734 | 6.80745 | 1.02379 |
| 6.99326 | 0.97821 | 7.00745 | 1.02333 |

**Figure 7**

| T   | Hc       | S       |
|-----|----------|---------|
| 5   | 77.26942 | 0.3945  |
| 10  | 76.36645 | 0.41404 |
| 20  | 72.22066 | 0.39932 |
| 40  | 65.70018 | 0.37081 |
| 50  | 62.38682 | 0.3614  |
| 60  | 60.81031 | 0.34912 |
| 80  | 60.34203 | 0.34554 |
| 100 | 60.56196 | 0.34122 |
| 120 | 58.5     | 0.33238 |
| 150 | 58.90667 | 0.33665 |
| 200 | 55.75816 | 0.32879 |
| 300 | 51.98058 | 0.31611 |
| 350 | 51.8     | 0.29016 |
| 400 | 50.1427  | 0.2812  |
| 500 | 44.8247  | 0.27337 |
| 550 | 43.8304  | 0.27549 |
| 600 | 40.8874  | 0.25145 |
| 650 | 35.2812  | 0.2299  |
| 700 | 31.91855 | 0.21348 |
| 750 | 31.69002 | 0.22229 |
| 800 | 29.73964 | 0.19352 |

**Figure 8**

| T | Ms  | T_fit   | Ms_fit     |
|---|-----|---------|------------|
|   | 60  | 0.89772 | 1 0.98789  |
|   | 80  | 0.88811 | 2 0.9858   |
|   | 100 | 0.86888 | 3 0.98374  |
|   | 120 | 0.86367 | 4 0.98171  |
|   | 150 | 0.84952 | 5 0.9797   |
|   | 200 | 0.83083 | 6 0.97772  |
|   | 300 | 0.80641 | 7 0.97576  |
|   | 350 | 0.80042 | 8 0.97382  |
|   | 400 | 0.77296 | 9 0.97191  |
|   | 500 | 0.65664 | 10 0.97002 |
|   | 550 | 0.57472 | 11 0.96816 |
|   | 600 | 0.48845 | 12 0.96632 |
|   | 650 | 0.36096 | 13 0.9645  |
|   | 700 | 0.21885 | 14 0.96271 |
|   | 750 | 0.08555 | 15 0.96093 |
|   | 800 | 0.02799 | 16 0.95918 |
|   |     |         | 17 0.95746 |
|   |     |         | 18 0.95575 |
|   |     |         | 19 0.95406 |
|   |     |         | 20 0.9524  |
|   |     |         | 21 0.95075 |
|   |     |         | 22 0.94913 |
|   |     |         | 23 0.94752 |
|   |     |         | 24 0.94594 |
|   |     |         | 25 0.94437 |
|   |     |         | 26 0.94283 |
|   |     |         | 27 0.9413  |
|   |     |         | 28 0.9398  |
|   |     |         | 29 0.93831 |
|   |     |         | 30 0.93684 |
|   |     |         | 31 0.93539 |
|   |     |         | 32 0.93395 |
|   |     |         | 33 0.93254 |
|   |     |         | 34 0.93114 |
|   |     |         | 35 0.92976 |
|   |     |         | 36 0.9284  |
|   |     |         | 37 0.92705 |
|   |     |         | 38 0.92572 |
|   |     |         | 39 0.92441 |
|   |     |         | 40 0.92311 |
|   |     |         | 41 0.92183 |
|   |     |         | 42 0.92056 |
|   |     |         | 43 0.91931 |
|   |     |         | 44 0.91808 |
|   |     |         | 45 0.91686 |

|    |         |
|----|---------|
| 46 | 0.91566 |
| 47 | 0.91447 |
| 48 | 0.9133  |
| 49 | 0.91214 |
| 50 | 0.91099 |
| 51 | 0.90986 |
| 52 | 0.90874 |
| 53 | 0.90764 |
| 54 | 0.90655 |
| 55 | 0.90548 |
| 56 | 0.90441 |
| 57 | 0.90337 |
| 58 | 0.90233 |
| 59 | 0.90131 |
| 60 | 0.9003  |
| 61 | 0.8993  |
| 62 | 0.89831 |
| 63 | 0.89734 |
| 64 | 0.89638 |
| 65 | 0.89543 |
| 66 | 0.89449 |
| 67 | 0.89356 |
| 68 | 0.89265 |
| 69 | 0.89175 |
| 70 | 0.89085 |
| 71 | 0.88997 |
| 72 | 0.8891  |
| 73 | 0.88824 |
| 74 | 0.88739 |
| 75 | 0.88655 |
| 76 | 0.88573 |
| 77 | 0.88491 |
| 78 | 0.8841  |
| 79 | 0.8833  |
| 80 | 0.88251 |
| 81 | 0.88173 |
| 82 | 0.88097 |
| 83 | 0.88021 |
| 84 | 0.87946 |
| 85 | 0.87872 |
| 86 | 0.87798 |
| 87 | 0.87726 |
| 88 | 0.87655 |
| 89 | 0.87584 |
| 90 | 0.87514 |
| 91 | 0.87446 |
| 92 | 0.87378 |

|     |         |
|-----|---------|
| 93  | 0.87311 |
| 94  | 0.87244 |
| 95  | 0.87179 |
| 96  | 0.87114 |
| 97  | 0.8705  |
| 98  | 0.86987 |
| 99  | 0.86925 |
| 100 | 0.86863 |
| 101 | 0.86802 |
| 102 | 0.86742 |
| 103 | 0.86683 |
| 104 | 0.86624 |
| 105 | 0.86566 |
| 106 | 0.86509 |
| 107 | 0.86452 |
| 108 | 0.86396 |
| 109 | 0.86341 |
| 110 | 0.86286 |
| 111 | 0.86232 |
| 112 | 0.86179 |
| 113 | 0.86126 |
| 114 | 0.86074 |
| 115 | 0.86023 |
| 116 | 0.85972 |
| 117 | 0.85922 |
| 118 | 0.85872 |
| 119 | 0.85823 |
| 120 | 0.85775 |
| 121 | 0.85727 |
| 122 | 0.8568  |
| 123 | 0.85633 |
| 124 | 0.85587 |
| 125 | 0.85541 |
| 126 | 0.85496 |
| 127 | 0.85451 |
| 128 | 0.85407 |
| 129 | 0.85364 |
| 130 | 0.85321 |
| 131 | 0.85278 |
| 132 | 0.85236 |
| 133 | 0.85194 |
| 134 | 0.85153 |
| 135 | 0.85112 |
| 136 | 0.85072 |
| 137 | 0.85032 |
| 138 | 0.84993 |
| 139 | 0.84954 |

|     |         |
|-----|---------|
| 140 | 0.84916 |
| 141 | 0.84878 |
| 142 | 0.8484  |
| 143 | 0.84803 |
| 144 | 0.84766 |
| 145 | 0.8473  |
| 146 | 0.84694 |
| 147 | 0.84658 |
| 148 | 0.84623 |
| 149 | 0.84588 |
| 150 | 0.84554 |
| 151 | 0.8452  |
| 152 | 0.84486 |
| 153 | 0.84452 |
| 154 | 0.84419 |
| 155 | 0.84387 |
| 156 | 0.84354 |
| 157 | 0.84322 |
| 158 | 0.8429  |
| 159 | 0.84259 |
| 160 | 0.84228 |
| 161 | 0.84197 |
| 162 | 0.84167 |
| 163 | 0.84136 |
| 164 | 0.84107 |
| 165 | 0.84077 |
| 166 | 0.84048 |
| 167 | 0.84019 |
| 168 | 0.8399  |
| 169 | 0.83961 |
| 170 | 0.83933 |
| 171 | 0.83905 |
| 172 | 0.83877 |
| 173 | 0.8385  |
| 174 | 0.83822 |
| 175 | 0.83795 |
| 176 | 0.83769 |
| 177 | 0.83742 |
| 178 | 0.83716 |
| 179 | 0.8369  |
| 180 | 0.83664 |
| 181 | 0.83638 |
| 182 | 0.83612 |
| 183 | 0.83587 |
| 184 | 0.83562 |
| 185 | 0.83537 |
| 186 | 0.83512 |

|     |         |
|-----|---------|
| 187 | 0.83488 |
| 188 | 0.83463 |
| 189 | 0.83439 |
| 190 | 0.83415 |
| 191 | 0.83391 |
| 192 | 0.83368 |
| 193 | 0.83344 |
| 194 | 0.83321 |
| 195 | 0.83297 |
| 196 | 0.83274 |
| 197 | 0.83251 |
| 198 | 0.83228 |
| 199 | 0.83206 |
| 200 | 0.83183 |
| 201 | 0.83161 |
| 202 | 0.83138 |
| 203 | 0.83116 |
| 204 | 0.83094 |
| 205 | 0.83072 |
| 206 | 0.8305  |
| 207 | 0.83028 |
| 208 | 0.83006 |
| 209 | 0.82985 |
| 210 | 0.82963 |
| 211 | 0.82942 |
| 212 | 0.8292  |
| 213 | 0.82899 |
| 214 | 0.82878 |
| 215 | 0.82856 |
| 216 | 0.82835 |
| 217 | 0.82814 |
| 218 | 0.82793 |
| 219 | 0.82772 |
| 220 | 0.82751 |
| 221 | 0.82731 |
| 222 | 0.8271  |
| 223 | 0.82689 |
| 224 | 0.82668 |
| 225 | 0.82647 |
| 226 | 0.82627 |
| 227 | 0.82606 |
| 228 | 0.82585 |
| 229 | 0.82565 |
| 230 | 0.82544 |
| 231 | 0.82523 |
| 232 | 0.82503 |
| 233 | 0.82482 |



|     |         |
|-----|---------|
| 234 | 0.82461 |
| 235 | 0.82441 |
| 236 | 0.8242  |
| 237 | 0.824   |
| 238 | 0.82379 |
| 239 | 0.82358 |
| 240 | 0.82337 |
| 241 | 0.82317 |
| 242 | 0.82296 |
| 243 | 0.82275 |
| 244 | 0.82254 |
| 245 | 0.82233 |
| 246 | 0.82212 |
| 247 | 0.82191 |
| 248 | 0.8217  |
| 249 | 0.82149 |
| 250 | 0.82128 |
| 251 | 0.82107 |
| 252 | 0.82086 |
| 253 | 0.82064 |
| 254 | 0.82043 |
| 255 | 0.82021 |
| 256 | 0.82    |
| 257 | 0.81978 |
| 258 | 0.81956 |
| 259 | 0.81934 |
| 260 | 0.81912 |
| 261 | 0.8189  |
| 262 | 0.81868 |
| 263 | 0.81846 |
| 264 | 0.81824 |
| 265 | 0.81801 |
| 266 | 0.81779 |
| 267 | 0.81756 |
| 268 | 0.81733 |
| 269 | 0.8171  |
| 270 | 0.81687 |
| 271 | 0.81664 |
| 272 | 0.81641 |
| 273 | 0.81617 |
| 274 | 0.81594 |
| 275 | 0.8157  |
| 276 | 0.81546 |
| 277 | 0.81522 |
| 278 | 0.81498 |
| 279 | 0.81473 |
| 280 | 0.81449 |

|     |         |
|-----|---------|
| 281 | 0.81424 |
| 282 | 0.81399 |
| 283 | 0.81374 |
| 284 | 0.81349 |
| 285 | 0.81324 |
| 286 | 0.81298 |
| 287 | 0.81272 |
| 288 | 0.81247 |
| 289 | 0.8122  |
| 290 | 0.81194 |
| 291 | 0.81168 |
| 292 | 0.81141 |
| 293 | 0.81114 |
| 294 | 0.81087 |
| 295 | 0.8106  |
| 296 | 0.81032 |
| 297 | 0.81004 |
| 298 | 0.80976 |
| 299 | 0.80948 |
| 300 | 0.8092  |
| 301 | 0.80891 |
| 302 | 0.80862 |
| 303 | 0.80833 |
| 304 | 0.80803 |
| 305 | 0.80774 |
| 306 | 0.80744 |
| 307 | 0.80714 |
| 308 | 0.80683 |
| 309 | 0.80653 |
| 310 | 0.80622 |
| 311 | 0.80591 |
| 312 | 0.80559 |
| 313 | 0.80527 |
| 314 | 0.80495 |
| 315 | 0.80463 |
| 316 | 0.80431 |
| 317 | 0.80398 |
| 318 | 0.80365 |
| 319 | 0.80331 |
| 320 | 0.80298 |
| 321 | 0.80263 |
| 322 | 0.80229 |
| 323 | 0.80194 |
| 324 | 0.8016  |
| 325 | 0.80124 |
| 326 | 0.80089 |
| 327 | 0.80053 |

|     |         |
|-----|---------|
| 328 | 0.80017 |
| 329 | 0.7998  |
| 330 | 0.79943 |
| 331 | 0.79906 |
| 332 | 0.79868 |
| 333 | 0.7983  |
| 334 | 0.79792 |
| 335 | 0.79753 |
| 336 | 0.79714 |
| 337 | 0.79675 |
| 338 | 0.79635 |
| 339 | 0.79595 |
| 340 | 0.79555 |
| 341 | 0.79514 |
| 342 | 0.79473 |
| 343 | 0.79432 |
| 344 | 0.7939  |
| 345 | 0.79347 |
| 346 | 0.79305 |
| 347 | 0.79261 |
| 348 | 0.79218 |
| 349 | 0.79174 |
| 350 | 0.7913  |
| 351 | 0.79085 |
| 352 | 0.7904  |
| 353 | 0.78994 |
| 354 | 0.78948 |
| 355 | 0.78902 |
| 356 | 0.78855 |
| 357 | 0.78808 |
| 358 | 0.7876  |
| 359 | 0.78712 |
| 360 | 0.78664 |
| 361 | 0.78615 |
| 362 | 0.78565 |
| 363 | 0.78516 |
| 364 | 0.78465 |
| 365 | 0.78414 |
| 366 | 0.78363 |
| 367 | 0.78311 |
| 368 | 0.78259 |
| 369 | 0.78207 |
| 370 | 0.78153 |
| 371 | 0.781   |
| 372 | 0.78046 |
| 373 | 0.77991 |
| 374 | 0.77936 |

|     |         |
|-----|---------|
| 375 | 0.7788  |
| 376 | 0.77824 |
| 377 | 0.77768 |
| 378 | 0.77711 |
| 379 | 0.77653 |
| 380 | 0.77595 |
| 381 | 0.77536 |
| 382 | 0.77477 |
| 383 | 0.77417 |
| 384 | 0.77357 |
| 385 | 0.77296 |
| 386 | 0.77235 |
| 387 | 0.77173 |
| 388 | 0.77111 |
| 389 | 0.77048 |
| 390 | 0.76984 |
| 391 | 0.7692  |
| 392 | 0.76856 |
| 393 | 0.76791 |
| 394 | 0.76725 |
| 395 | 0.76659 |
| 396 | 0.76592 |
| 397 | 0.76524 |
| 398 | 0.76456 |
| 399 | 0.76388 |
| 400 | 0.76318 |
| 401 | 0.76249 |
| 402 | 0.76178 |
| 403 | 0.76107 |
| 404 | 0.76036 |
| 405 | 0.75963 |
| 406 | 0.75891 |
| 407 | 0.75817 |
| 408 | 0.75743 |
| 409 | 0.75668 |
| 410 | 0.75593 |
| 411 | 0.75517 |
| 412 | 0.75441 |
| 413 | 0.75363 |
| 414 | 0.75286 |
| 415 | 0.75207 |
| 416 | 0.75128 |
| 417 | 0.75048 |
| 418 | 0.74968 |
| 419 | 0.74887 |
| 420 | 0.74805 |
| 421 | 0.74722 |

|     |         |
|-----|---------|
| 422 | 0.74639 |
| 423 | 0.74555 |
| 424 | 0.74471 |
| 425 | 0.74386 |
| 426 | 0.743   |
| 427 | 0.74213 |
| 428 | 0.74126 |
| 429 | 0.74038 |
| 430 | 0.7395  |
| 431 | 0.7386  |
| 432 | 0.7377  |
| 433 | 0.7368  |
| 434 | 0.73588 |
| 435 | 0.73496 |
| 436 | 0.73403 |
| 437 | 0.73309 |
| 438 | 0.73215 |
| 439 | 0.7312  |
| 440 | 0.73024 |
| 441 | 0.72928 |
| 442 | 0.7283  |
| 443 | 0.72732 |
| 444 | 0.72633 |
| 445 | 0.72534 |
| 446 | 0.72434 |
| 447 | 0.72333 |
| 448 | 0.72231 |
| 449 | 0.72128 |
| 450 | 0.72025 |
| 451 | 0.71921 |
| 452 | 0.71816 |
| 453 | 0.7171  |
| 454 | 0.71603 |
| 455 | 0.71496 |
| 456 | 0.71388 |
| 457 | 0.71279 |
| 458 | 0.7117  |
| 459 | 0.71059 |
| 460 | 0.70948 |
| 461 | 0.70836 |
| 462 | 0.70723 |
| 463 | 0.70609 |
| 464 | 0.70495 |
| 465 | 0.70379 |
| 466 | 0.70263 |
| 467 | 0.70146 |
| 468 | 0.70028 |

|     |         |
|-----|---------|
| 469 | 0.6991  |
| 470 | 0.6979  |
| 471 | 0.6967  |
| 472 | 0.69549 |
| 473 | 0.69427 |
| 474 | 0.69304 |
| 475 | 0.6918  |
| 476 | 0.69056 |
| 477 | 0.6893  |
| 478 | 0.68804 |
| 479 | 0.68677 |
| 480 | 0.68549 |
| 481 | 0.6842  |
| 482 | 0.6829  |
| 483 | 0.6816  |
| 484 | 0.68028 |
| 485 | 0.67896 |
| 486 | 0.67763 |
| 487 | 0.67628 |
| 488 | 0.67493 |
| 489 | 0.67358 |
| 490 | 0.67221 |
| 491 | 0.67083 |
| 492 | 0.66945 |
| 493 | 0.66805 |
| 494 | 0.66665 |
| 495 | 0.66524 |
| 496 | 0.66381 |
| 497 | 0.66238 |
| 498 | 0.66094 |
| 499 | 0.65949 |
| 500 | 0.65804 |
| 501 | 0.65657 |
| 502 | 0.65509 |
| 503 | 0.65361 |
| 504 | 0.65211 |
| 505 | 0.65061 |
| 506 | 0.6491  |
| 507 | 0.64757 |
| 508 | 0.64604 |
| 509 | 0.6445  |
| 510 | 0.64295 |
| 511 | 0.64139 |
| 512 | 0.63982 |
| 513 | 0.63824 |
| 514 | 0.63665 |
| 515 | 0.63506 |

|     |         |
|-----|---------|
| 516 | 0.63345 |
| 517 | 0.63184 |
| 518 | 0.63021 |
| 519 | 0.62857 |
| 520 | 0.62693 |
| 521 | 0.62528 |
| 522 | 0.62361 |
| 523 | 0.62194 |
| 524 | 0.62026 |
| 525 | 0.61857 |
| 526 | 0.61687 |
| 527 | 0.61515 |
| 528 | 0.61343 |
| 529 | 0.6117  |
| 530 | 0.60997 |
| 531 | 0.60822 |
| 532 | 0.60646 |
| 533 | 0.60469 |
| 534 | 0.60291 |
| 535 | 0.60112 |
| 536 | 0.59933 |
| 537 | 0.59752 |
| 538 | 0.59571 |
| 539 | 0.59388 |
| 540 | 0.59205 |
| 541 | 0.5902  |
| 542 | 0.58835 |
| 543 | 0.58648 |
| 544 | 0.58461 |
| 545 | 0.58273 |
| 546 | 0.58083 |
| 547 | 0.57893 |
| 548 | 0.57702 |
| 549 | 0.5751  |
| 550 | 0.57317 |
| 551 | 0.57123 |
| 552 | 0.56928 |
| 553 | 0.56732 |
| 554 | 0.56535 |
| 555 | 0.56337 |
| 556 | 0.56139 |
| 557 | 0.55939 |
| 558 | 0.55738 |
| 559 | 0.55537 |
| 560 | 0.55334 |
| 561 | 0.55131 |
| 562 | 0.54926 |

|     |         |
|-----|---------|
| 563 | 0.54721 |
| 564 | 0.54515 |
| 565 | 0.54307 |
| 566 | 0.54099 |
| 567 | 0.5389  |
| 568 | 0.5368  |
| 569 | 0.53469 |
| 570 | 0.53257 |
| 571 | 0.53045 |
| 572 | 0.52831 |
| 573 | 0.52616 |
| 574 | 0.52401 |
| 575 | 0.52184 |
| 576 | 0.51967 |
| 577 | 0.51749 |
| 578 | 0.5153  |
| 579 | 0.5131  |
| 580 | 0.51089 |
| 581 | 0.50867 |
| 582 | 0.50644 |
| 583 | 0.50421 |
| 584 | 0.50196 |
| 585 | 0.49971 |
| 586 | 0.49745 |
| 587 | 0.49518 |
| 588 | 0.4929  |
| 589 | 0.49061 |
| 590 | 0.48832 |
| 591 | 0.48601 |
| 592 | 0.4837  |
| 593 | 0.48138 |
| 594 | 0.47905 |
| 595 | 0.47671 |
| 596 | 0.47436 |
| 597 | 0.47201 |
| 598 | 0.46964 |
| 599 | 0.46727 |
| 600 | 0.4649  |
| 601 | 0.46251 |
| 602 | 0.46011 |
| 603 | 0.45771 |
| 604 | 0.4553  |
| 605 | 0.45288 |
| 606 | 0.45046 |
| 607 | 0.44803 |
| 608 | 0.44559 |
| 609 | 0.44314 |



|     |         |
|-----|---------|
| 610 | 0.44068 |
| 611 | 0.43822 |
| 612 | 0.43575 |
| 613 | 0.43327 |
| 614 | 0.43079 |
| 615 | 0.4283  |
| 616 | 0.4258  |
| 617 | 0.42329 |
| 618 | 0.42078 |
| 619 | 0.41826 |
| 620 | 0.41574 |
| 621 | 0.41321 |
| 622 | 0.41067 |
| 623 | 0.40813 |
| 624 | 0.40557 |
| 625 | 0.40302 |
| 626 | 0.40046 |
| 627 | 0.39789 |
| 628 | 0.39531 |
| 629 | 0.39273 |
| 630 | 0.39015 |
| 631 | 0.38755 |
| 632 | 0.38496 |
| 633 | 0.38235 |
| 634 | 0.37975 |
| 635 | 0.37713 |
| 636 | 0.37452 |
| 637 | 0.37189 |
| 638 | 0.36927 |
| 639 | 0.36663 |
| 640 | 0.364   |
| 641 | 0.36135 |
| 642 | 0.35871 |
| 643 | 0.35606 |
| 644 | 0.3534  |
| 645 | 0.35075 |
| 646 | 0.34808 |
| 647 | 0.34542 |
| 648 | 0.34275 |
| 649 | 0.34007 |
| 650 | 0.3374  |
| 651 | 0.33472 |
| 652 | 0.33203 |
| 653 | 0.32935 |
| 654 | 0.32666 |
| 655 | 0.32397 |
| 656 | 0.32127 |

|     |         |
|-----|---------|
| 657 | 0.31858 |
| 658 | 0.31588 |
| 659 | 0.31318 |
| 660 | 0.31048 |
| 661 | 0.30777 |
| 662 | 0.30506 |
| 663 | 0.30236 |
| 664 | 0.29965 |
| 665 | 0.29694 |
| 666 | 0.29423 |
| 667 | 0.29151 |
| 668 | 0.2888  |
| 669 | 0.28609 |
| 670 | 0.28337 |
| 671 | 0.28066 |
| 672 | 0.27794 |
| 673 | 0.27523 |
| 674 | 0.27252 |
| 675 | 0.2698  |
| 676 | 0.26709 |
| 677 | 0.26438 |
| 678 | 0.26167 |
| 679 | 0.25896 |
| 680 | 0.25625 |
| 681 | 0.25354 |
| 682 | 0.25084 |
| 683 | 0.24813 |
| 684 | 0.24543 |
| 685 | 0.24273 |
| 686 | 0.24004 |
| 687 | 0.23734 |
| 688 | 0.23465 |
| 689 | 0.23197 |
| 690 | 0.22928 |
| 691 | 0.2266  |
| 692 | 0.22393 |
| 693 | 0.22125 |
| 694 | 0.21858 |
| 695 | 0.21592 |
| 696 | 0.21326 |
| 697 | 0.21061 |
| 698 | 0.20796 |
| 699 | 0.20531 |
| 700 | 0.20267 |
| 701 | 0.20004 |
| 702 | 0.19741 |
| 703 | 0.19479 |

|     |         |
|-----|---------|
| 704 | 0.19217 |
| 705 | 0.18957 |
| 706 | 0.18696 |
| 707 | 0.18437 |
| 708 | 0.18178 |
| 709 | 0.1792  |
| 710 | 0.17663 |
| 711 | 0.17407 |
| 712 | 0.17151 |
| 713 | 0.16897 |
| 714 | 0.16643 |
| 715 | 0.1639  |
| 716 | 0.16138 |
| 717 | 0.15887 |
| 718 | 0.15637 |
| 719 | 0.15388 |
| 720 | 0.1514  |
| 721 | 0.14893 |
| 722 | 0.14647 |
| 723 | 0.14402 |
| 724 | 0.14158 |
| 725 | 0.13916 |
| 726 | 0.13675 |
| 727 | 0.13435 |
| 728 | 0.13196 |
| 729 | 0.12958 |
| 730 | 0.12722 |
| 731 | 0.12487 |
| 732 | 0.12253 |
| 733 | 0.12021 |
| 734 | 0.1179  |
| 735 | 0.11561 |
| 736 | 0.11333 |
| 737 | 0.11106 |
| 738 | 0.10881 |
| 739 | 0.10658 |
| 740 | 0.10436 |
| 741 | 0.10216 |
| 742 | 0.09997 |
| 743 | 0.0978  |
| 744 | 0.09565 |
| 745 | 0.09351 |
| 746 | 0.09139 |
| 747 | 0.08929 |
| 748 | 0.08721 |
| 749 | 0.08514 |
| 750 | 0.0831  |

|     |         |
|-----|---------|
| 751 | 0.08107 |
| 752 | 0.07906 |
| 753 | 0.07707 |
| 754 | 0.0751  |
| 755 | 0.07316 |
| 756 | 0.07123 |
| 757 | 0.06932 |
| 758 | 0.06743 |
| 759 | 0.06556 |
| 760 | 0.06372 |
| 761 | 0.06189 |
| 762 | 0.06009 |
| 763 | 0.05831 |
| 764 | 0.05656 |
| 765 | 0.05482 |
| 766 | 0.05311 |
| 767 | 0.05142 |
| 768 | 0.04976 |
| 769 | 0.04812 |
| 770 | 0.0465  |
| 771 | 0.04491 |
| 772 | 0.04334 |
| 773 | 0.0418  |
| 774 | 0.04028 |
| 775 | 0.03879 |
| 776 | 0.03732 |
| 777 | 0.03588 |
| 778 | 0.03447 |
| 779 | 0.03308 |
| 780 | 0.03172 |
| 781 | 0.03038 |
| 782 | 0.02908 |
| 783 | 0.0278  |
| 784 | 0.02654 |
| 785 | 0.02532 |
| 786 | 0.02412 |
| 787 | 0.02295 |
| 788 | 0.02181 |
| 789 | 0.0207  |
| 790 | 0.01962 |
| 791 | 0.01856 |
| 792 | 0.01754 |
| 793 | 0.01654 |
| 794 | 0.01558 |
| 795 | 0.01464 |
| 796 | 0.01373 |
| 797 | 0.01285 |

|     |         |
|-----|---------|
| 798 | 0.012   |
| 799 | 0.01118 |
| 800 | 0.01039 |

## Code

```
from dataclasses import dataclass
from typing import Callable
import numpy as np
from scipy.optimize import curve_fit
from matplotlib import pyplot as plt

def subplot() -> tuple[plt.FigureBase, plt.Axes]:
    fig, ax = plt.subplots()
    assert type(ax) == plt.Axes
    return fig, ax

@dataclass(frozen=True)
class ParamFunction:
    f: Callable
    name: str
    params: list[str]
    def __call__(self, *args, **kwds):
        return self.f(*args, **kwds)

f1 = ParamFunction(lambda x, a, m0, tc: m0 * (1 - np.power(x/tc, a)),
                   'f1',
                   ['a', 'm0', 'tc'])
f2 = ParamFunction(lambda x, a, m0, tc, b: m0 * np.power(1 - np.power(x/tc, a), b),
                   'f2',
                   ['a', 'm0', 'tc', 'b'])
f3 = ParamFunction(lambda x, A, tf: A * np.exp(-x / tf),
                   'f3',
                   ['A', 'tf'])

F1 = ParamFunction(lambda x, a, m0, tc, A, tf: f1(x, a, m0, tc) + f3(x, A, tf),
                   'F1',
                   ['a', 'm0', 'tc', 'A', 'tf'])
F2 = ParamFunction(lambda x, a, m0, tc, b, A, tf: f2(x, a, m0, tc, b) + f3(x, A, tf),
                   'F2',
                   ['a', 'm0', 'tc', 'b', 'A', 'tf'])

Hc = ParamFunction(lambda x, h0, tb, h: h0 * (1 - np.power(x / tb, h)),
                   'Hc',
                   ['h0', 'tb', 'h'])

def fit_and_show(f, x, y, p0, ls):
    p, cv = curve_fit(f, x, y, p0=p0)
    ax.plot(ls, f(ls, *p), label=f.name)

    print(f"{f.name}:")
    for pi, vi, ci in zip(f.params, p, np.sqrt(np.diag(cv))):
        print(f"\t{pi} = {vi} ({ci})")

dat = [
    (5, 1),
```

```

(10, 0.953779564841234),
(20, 0.948273767764934),
(40, 0.92586138083705),
(50, 0.916032256385212),
(60, 0.897720089342155),
(80, 0.88810911443679),
(100, 0.868882206681821),
(120, 0.863668928315563),
(150, 0.849516476488189),
(200, 0.830829984655163),
(300, 0.806414588255126),
(350, 0.800417954699263),
(400, 0.772961039904446),
(500, 0.656636402866549),
(550, 0.574722076129099),
(600, 0.488448919564356),
(650, 0.36096009563337),
(700, 0.218849097312668),
(750, 0.0855452003272218),
(800, 0.0279856413461573),
]
l = np.linspace(1, 820, num=500)
fig, ax = subplot()

x = [xi for (xi, _) in dat]
y = [yi for (_, yi) in dat]
ax.plot(x, y, 'o', label='data')

fit_and_show(f1, x[10:], y[10:], [1., 1., 800], 1)
fit_and_show(f2, x[10:], y[10:], [1., 1., 800, 1.], 1)
fit_and_show(F1, x, y, [.5, 1., 800, 1., 23], 1)
fit_and_show(F2, x, y, [.5, 1., 800, 1., 1., 23], 1)

fig.legend()

dat = [
(5, 77.26942),
(10, 76.36645),
(20, 72.22066),
(40, 65.70018),
(50, 62.38682),
(60, 60.81031),
(80, 60.34203),
(100, 60.56196),
]
l = np.linspace(1, 120, num=500)
fig, ax = subplot()

x = [xi for (xi, _) in dat]
y = [yi for (_, yi) in dat]
ax.plot(x, y, 'o', label='data')

```

```
fit_and_show(Hc, x[:-2], y[:-2], [80, 23, .5], 1)
```

```
fig.legend()
```

```
dat = [  
    (5, 67.18867),  
    (10, 67.20117),  
    (30, 67.11772),  
    (50, 67.09355),  
    (100, 67.10245),  
    (150, 66.61136),  
    (200, 64.98436),  
    (250, 61.87217),  
    (300, 57.99963),
```

```
]
```

```
l = np.linspace(1, 310, num=500)
```

```
fig, ax = subplot()
```

```
x = [xi for (xi, _) in dat]
```

```
y = [yi for (_, yi) in dat]
```

```
ax.plot(x, y, 'o', label='data')
```

```
fit_and_show(f1, x, y, [1., 60, 500], 1)
```

```
fit_and_show(f2, x, y, [1., 60, 500, 1.], 1)
```

```
fig.legend()
```

```
dat = [  
    (5, 86.56108),  
    (10, 70.2632),  
    (30, 65.3259),  
    (50, 63.14271),  
    (100, 62.19026),  
    (150, 62.48279),  
    (200, 62.4871),  
    (250, 61.02536),  
    (300, 57.982),
```

```
]
```

```
l = np.linspace(3, 50, num=500)
```

```
fig, ax = subplot()
```

```
x = [xi for (xi, _) in dat]
```

```
y = [yi for (_, yi) in dat]
```

```
ax.plot(x, y, 'o', label='data')
```

```
fit_and_show(f3, x, y, [80, 4], 1)
```

```
fig.legend()
```

```
plt.show()
```
